# Supplementary material for: Shared genetic architecture between inflammatory proteins and eGFR difference identifies chronic inflammation risk factors for kidney function impairment
Source: Research Square preprint supplement (doi:10.21203/rs.3.rs-8627406/v1), 2026-01-27
Supplement: Supplementary file 1 [file fa158dd2f64e217535e8c3fa.xlsx]

## Sheet: Content
Supplementary Tables: Proteomic Signatures of Inflammation for Early Identification of Kidney Function Impairment
ST1	Summary of Top Associated SNPs, Mapped Genes, and Genomic Statistics for Kidney Function Traits Identified by GWAS and FUMA Annottation.
ST2	Frequency of Non-Kidney-Related Traits Across Derived eGFR Metrics (eGFRdiff, eGFRmean, eGFRdiff.mean, and eGFRdiff.pct.cr)
ST3	839 Inflammation biomarkers and UniProt ID.
ST4	Genetic correlation (rg) estimates from LD score regression analysis.
ST5	P value from z scores from LDSC analysis.
ST6	Causal effect of inflammation protein on kidney function based on 5 Mendelian Randomization
ST7	Causal effect of kidney function on inflammation protein based on 5 Mendelian Randomization
ST8	Proteins repeatedly validated across 4 MR methods.
ST9	Proteins repeatedly validated across all 5 MR methods.
ST10	Protein Baseline Characteristics by CKD.
ST11	Causal Proteins in Chronic Kidney Disease and Non-CKD Groups.
ST12	Protein-Level Outcome Data for CKD and Non-CKD Groups.
ST13	Genetic Baseline Characteristics by CKD.
ST14	Correlation coeffecient of prediction using PRS.

## Sheet: ST1
Supplementary Table 1. Summary of Top Associated SNPs, Mapped Genes, and Genomic Statistics for Kidney Function Traits Identified by GWAS and FUMA Annottation.
This table summarizes the lead SNPs and corresponding genes identified across multiple kidney-related traits, along with the number of genomic risk loci, lead SNPs, mapped genes, and GWAS Catalog-tagged candidate SNPs derived from FUMA analysis.
Category	Trait	Equation	Sample size of UK Biobank	TOP SNP	Gene	Genetic risk loci	lead SNPs	candidate GWAS tagged SNPs	mapped genes	Heritability (h2)	Reported heritability in literature
eGFR based	eGFRcys	based on cystatin C (2012 version, NEJM)	389282	rs76725003	CST2	538	1537	115646	2665	0.263	0.24-0.58
	eGFRcr	based on serum creatinine (2021 version, NEJM)	389282	rs2433601	SPATA5L1	520	1345	107269	2684	0.2067	0.098-0.54
	eGFRcc	combined both（2021 version, NEJM）	389282	rs1398018	SHROOM3	612	1835	141912	3160	0.3424	0.19-0.48
eGFR derived	eGFRmean	(egfr12 +egfr21)/2	389282	rs1538908	CST4	608	1819	139427	3103	0.3337	——
	eGFRdiff	egfr12 – egfr21	389282	rs76308965	CSTL1	300	822	64617	1465	0.2395	——
	eGFRdiff.mean	(egfr21 – egfr12)/((egfr12 +egfr21)/2)	389282	rs6049099	CST1	301	808	61788	1467	0.235	——
	eGFRdiff.pct.cr	(egfr12 - egfr21) / egfr21 × 100 (%)	389282	rs6049099	CST1	301	808	61788	1467	0.184	——
Metabolic Waste	Urate	-	390481	rs4697691	SLC2A9	389	1115	85707	2068	0.2191	0.47-0.48
	Urea	-	390685	rs45480797	PTGER4,TTC33	233	553	42860	1141	0.1157	0.31
Urinary ratio	UK/UCR	urinary potassium / creatinine	396227	rs1047891	CPS1	30	39	3704	111	0.0636	0.053
	UNA/UK	urinary sodium / potassium	395394	rs1260326	GCKR	35	39	4586	110	0.0614	0.051
	UNA/UCR	urinary sodium / creatinine	396264	rs1260326	GCKR	39	41	4217	115	0.0526	0.042
	UACR	urinary microalbumin / creatinine	397190	rs45551835	CUBN	40	59	4565	148	0.0517	0.053-0.211
Trait names are grouped by biological relevance into categories such as eGFR-based, eGFR-derived, urinary ratios, and metabolic waste indicators. Heritability (h²) was calculated using LD Score Regression, and previously reported ranges are provided where available.

## Sheet: ST2
Supplementary Table 2.Frequency of Non-Kidney-Related Traits Across Derived eGFR Metrics (eGFRdiff, eGFRmean, eGFRdiff.mean, and eGFRdiff.pct.cr)
Trait	eGFRdiff.pct.cr_Frequency	eGFRdiff_Frequency	eGFRmean_Frequency	eGFRdiff.mean_Frequency
Body mass index	319	298	317	319
Electrocardiogram morphology (amplitude at temporal datapoints)	111	148	113	111
Type 2 diabetes	135	137	180	135
Height	128	131	305	128
Waist circumference adjusted for body mass index	119	127	212	119
Total cholesterol levels	119	120	113	119
Sex hormone-binding globulin levels	122	114	127	122
Platelet count	120	109	178	120
Low density lipoprotein cholesterol levels	98	104	92	98
Waist-to-hip ratio adjusted for BMI	97	102	186	97
High density lipoprotein cholesterol levels	102	102	87	102
White blood cell count	95	98	128	95
Asthma and cardiovascular disease	96	96	41	96
Lymphocyte count	96	95	65	96
Inguinal hernia	94	94	55	94
Heel bone mineral density	95	93	148	95
Blood protein levels	95	91	87	95
Hip circumference adjusted for BMI	79	88	167	79
Triglyceride levels	88	88	93	88
Insomnia	78	86	128	78
Schizophrenia	81	84	89	81
Mean corpuscular hemoglobin	72	70	83	72
Mean corpuscular volume	79	70	71	79
Eosinophil counts	65	68	76	65
Systolic blood pressure	60	65	143	60
Waist-hip ratio	63	64	86	63
Asthma	64	64	37	64
Pulse pressure	57	63	63	57
Red blood cell count	60	62	125	60
Monocyte count	65	62	81	65
Appendicular lean mass	57	62	61	57
Waist-hip index	59	61	110	59
HDL cholesterol levels	59	60	48	59
Educational attainment	55	57	102	55
Educational attainment (years of education)	54	57	60	54
Red cell distribution width	55	56	79	55
Neutrophil count	52	54	82	52
Coronary artery disease	53	54	74	53
Sex hormone-binding globulin levels adjusted for BMI	57	54	60	57
Systemic lupus erythematosus	51	51	59	51
Rheumatoid arthritis	41	50	26	41
Diastolic blood pressure	43	48	126	43
C-reactive protein levels	50	47	84	50
Body fat percentage	47	47	29	47
Triglycerides	43	43	43	43
Mean platelet volume	39	41	57	39
HDL cholesterol	39	39	26	39
Aspartate aminotransferase levels	36	39	23	36
Apolipoprotein A1 levels	36	36	39	36
A body shape index	32	35	61	32
Brain morphology (MOSTest)	35	35	55	35
Non-HDL cholesterol levels	37	35	29	37
Hip index	31	34	31	31
Hematocrit	31	33	90	31
Educational attainment (MTAG)	31	33	36	31
Alanine aminotransferase levels	30	33	22	30
Waist circumference	33	33	12	33
Plateletcrit	31	32	42	31
Neuroticism	34	32	34	34
Weight	32	32	33	32
Body mass index (joint analysis main effects and physical activity interaction)	36	32	17	36
Intelligence (MTAG)	30	31	26	30
White matter microstructure (radial diusivities)	21	31	4	21
Waist-to-hip ratio adjusted for body mass index	30	30	26	30
General cognitive ability	27	28	53	27
Asthma (childhood onset)	28	28	16	28
Body mass index in physically active individuals	31	28	14	31
Glycine levels	23	28	1	23
Serum alkaline phosphatase levels	26	27	39	26
Prostate cancer	22	27	39	22
LDL cholesterol levels	27	27	33	27
Apolipoprotein B levels	24	26	27	24
Type 1 diabetes	27	26	25	27
Inflammatory bowel disease	28	26	17	28
Cortical surface area	24	25	40	24
Crohn's disease	24	24	29	24
Hip circumference	26	24	11	26
Vertex-wise sulcal depth	21	23	45	21
Menarche (age at onset)	22	23	22	22
LDL cholesterol	23	23	21	23
Primary biliary cholangitis	27	23	13	27
Post bronchodilator FEV1	22	22	71	22
Lung function (FVC)	20	22	29	20
Monocyte percentage of white cells	24	22	23	24
Neutrophil percentage of white cells	23	22	18	23
Atopic dermatitis	21	22	16	21
Hypothyroidism	21	22	11	21
Multiple sclerosis	20	21	17	20
White matter microstructure (fractional anisotropy)	13	21	12	13
Total testosterone levels	22	20	25	22
Birth weight	20	20	23	20
Adult body size	20	20	22	20
Serum albumin levels	21	20	21	21
Schizophrenia (MTAG)	20	20	16	20
circulating leptin levels adjusted for BMI	20	20		20
Hemoglobin concentration	17	19	50	17
Vertex-wise cortical surface area	18	19	31	18
Highest math class taken (MTAG)	18	19	25	18
Lymphocyte percentage of white cells	20	19	22	20
Smoking initiation (ever regular vs never regular) (MTAG)	16	19	22	16
Hemoglobin	17	18	45	17
Vertex-wise cortical thickness	18	18	36	18
Breast cancer	18	18	28	18
Cognitive performance (MTAG)	15	18	16	15
Brain region volumes	16	17	28	16
Fat-free mass	17	17	27	17
Predicted visceral adipose tissue	19	17	17	19
Systemic sclerosis	17	17	15	17
White matter microstructure (mean diusivities)	10	17	1	10
Alcohol dependence	25	17		25
Basophil count	13	16	35	13
Cortical thickness	16	16	31	16
Serum total protein level	18	16	18	18
Reaction time	17	16	17	17
Protein quantitative trait loci (liver)	19	16	13	19
Male-pattern baldness	15	15	45	15
Waist-to-hip ratio adjusted for BMI (additive genetic model)	15	15	33	15
Mean corpuscular hemoglobin concentration	12	15	31	12
Platelet distribution width	14	15	27	14
Serum 25-Hydroxyvitamin D levels	15	15	19	15
Smoking initiation (ever regular vs never regular)	13	15	17	13
Metabolic biomarkers (multivariate analysis)	15	15	15	15
Ulcerative colitis	15	15	14	15
Eczema	14	15	12	14
Platelet-to-lymphocyte ratio	15	15	9	15
Lung adenocarcinoma	15	15	7	15
circulating leptin levels	15	15		15
Intelligence	13	14	39	13
Hemoglobin levels	14	14	28	14
C-reactive protein	14	14	13	14
Hand grip strength	14	14	11	14
Externalizing behaviour (multivariate analysis)	12	14	11	12
Body fat distribution (arm fat ratio)	14	14	8	14
Adolescent idiopathic scoliosis	8	14	5	8
HDL cholesterol levels x alcohol consumption (drinkers vs non-drinkers) interaction (2df)	14	14	4	14
HDL cholesterol levels x alcohol consumption (regular vs non-regular drinkers) interaction (2df)	14	14	4	14
Glycated hemoglobin levels	10	13	23	10
Lung function (FEV1/FVC)	10	13	21	10
Mean spheric corpuscular volume	13	13	18	13
Refractive error	11	13	17	11
Highest math class taken	12	13	10	12
BMI (adjusted for smoking behaviour)	15	13	9	15
Rheumatoid arthritis (rheumatoid factor and/or anti-cyclic citrullinated peptide seropositive)	10	13	6	10
Fasting insulin	13	13	4	13
HDL cholesterol levels in current drinkers	13	13	3	13
Venous thromboembolism	13	13	3	13
Thyroid stimulating hormone levels	11	13	2	11
Thyroid hormone levels	10	13		10
Calcium levels	11	12	33	11
Attention deficit hyperactivity disorder or autism spectrum disorder or intelligence (pleiotropy)	11	12	28	11
Reticulocyte count	10	12	28	10
Albumin levels	11	12	25	11
Mean arterial pressure	9	12	25	9
High light scatter reticulocyte count	11	12	23	11
QT interval	10	12	19	10
Liver enzyme levels (gamma-glutamyl transferase)	12	12	15	12
Medication use (thyroid preparations)	12	12	14	12
Allergic disease (asthma, hay fever or eczema)	10	12	14	10
Body mass index (joint analysis main effects and smoking interaction)	14	12	10	14
Cognitive ability, years of educational attainment or schizophrenia (pleiotropy)	10	12	10	10
Total bilirubin levels	10	12	9	10
BMI in non-smokers	14	12	8	14
Lymphocyte-to-monocyte ratio	12	12	7	12
Non-albumin protein levels	12	12	7	12
LDL cholesterol levels x alcohol consumption (regular vs non-regular drinkers) interaction (2df)	12	12	6	12
Metabolite levels	11	11	24	11
Eosinophil percentage of white cells	10	11	17	10
Gamma glutamyl transpeptidase	11	11	16	11
Myocardial infarction	11	11	16	11
QRS duration	11	11	14	11
Obesity-related traits	11	11	12	11
Cholesterol, total	11	11	10	11
Medication use (HMG CoA reductase inhibitors)	11	11	10	11
Neurociticism	11	11	10	11
Offspring birth weight	10	11	10	10
Lung cancer	11	11	9	11
Chronotype	10	11	8	10
Alcohol consumption (drinks per week) (MTAG)	11	11	7	11
Neutrophil-to-lymphocyte ratio	11	11	5	11
Waist-to-hip ratio adjusted for BMI in active individuals	11	11	4	11
Household income (MTAG)	9	10	17	9
Cardiovascular disease	9	10	15	9
Autism spectrum disorder or schizophrenia	9	10	12	9
Body fat distribution (leg fat ratio)	10	10	11	10
Age of smoking initiation (MTAG)	8	10	10	8
Lifetime smoking index	10	10	9	10
Noncognitive aspects of educational attainment	11	10	8	11
LDL cholesterol levels x alcohol consumption (drinkers vs non-drinkers) interaction (2df)	10	10	6	10
Waist-to-hip ratio adjusted for BMI (joint analysis for main effect and physical activity interaction)	10	10	5	10
Childhood body mass index	10	10	2	10
Vertical cup-disc ratio	9	9	37	9
Reticulocyte fraction of red cells	7	9	23	7
Hemoglobin A1c levels	9	9	19	9
Whole brain restricted isotropic diffusion (multivariate analysis)	8	9	19	8
High light scatter reticulocyte percentage of red cells	9	9	16	9
Waist circumference adjusted for BMI (joint analysis main effects and physical activity interaction)	9	9	15	9
Waist circumference adjusted for BMI in active individuals	9	9	15	9
Depression	13	9	10	13
Cystatin-D levels	9	9	9	9
Waist-to-hip ratio adjusted for BMI (adjusted for smoking behaviour)	9	9	7	9
Atrial fibrillation	9	9	6	9
Atopic asthma	9	9	5	9
Psoriasis	9	9	5	9
Lipoprotein (a) levels	7	9	5	7
Rheumatoid arthritis (ACPA-positive)	9	9	2	9
Celiac disease	8	9	2	8
Thyroid cancer	9	9		9
Intraocular pressure	7	8	51	7
Serum metabolite levels	6	8	30	6
Whole brain restricted directional diffusion (multivariate analysis)	7	8	17	7
Mean reticulocyte volume	8	8	16	8
Bipolar disorder	8	8	15	8
Self-reported math ability (MTAG)	8	8	15	8
Liver enzyme levels (alkaline phosphatase)	8	8	14	8
Body size at age 10	8	8	12	8
Hair color	8	8	12	8
Bioavailable testosterone levels	7	8	12	7
Waist circumference adjusted for BMI (adjusted for smoking behaviour)	8	8	11	8
Waist circumference adjusted for BMI (joint analysis main effects and smoking interaction)	8	8	11	8
Age at first sexual intercourse	10	8	10	10
Worry	8	8	9	8
Medication use (calcium channel blockers)	6	8	9	6
Sex hormone-binding globulin levels in postmenopausal women	9	8	8	9
Body fat distribution (trunk fat ratio)	8	8	8	8
Cystatin-SN levels	8	8	7	8
Anorexia nervosa, attention-deficit/hyperactivity disorder, autism spectrum disorder, bipolar disorder, major depression, obsessive-compulsive disorder, schizophrenia, or Tourette syndrome (pleiotropy)	8	8	6	8
LDL cholesterol levels in current drinkers	8	8	5	8
Cholesteryl esters to total lipids ratio in medium HDL	8	8	3	8
Walking pace	7	7	15	7
Testosterone levels	7	7	14	7
Corneal resistance factor (MTAG)	4	7	13	4
JT interval	7	7	12	7
Whole brain free water diffusion (multivariate analysis)	6	7	12	6
Subcortical volume (MOSTest)	7	7	10	7
Chronic inflammatory diseases (ankylosing spondylitis, Crohn's disease, psoriasis, primary sclerosing cholangitis, ulcerative colitis) (pleiotropy)	8	7	9	8
Bipolar disorder (MTAG)	7	7	9	7
Feeling nervous	7	7	8	7
Alcohol consumption (drinks per week)	6	7	8	6
Self-reported math ability	6	7	8	6
Major depressive disorder	7	7	7	7
Smoking cessation (MTAG)	7	7	7	7
Smoking status	7	7	7	7
Cholesterol levels in large HDL	7	7	6	7
Metabolic syndrome	7	7	6	7
Brain shape (segment 1)	6	7	6	6
Liver enzyme levels (alanine transaminase)	6	7	6	6
Total triglycerides levels	7	7	4	7
Fish- and plant-related diet	5	7	4	5
Free cholesterol levels in very large VLDL	7	7	3	7
Triglycerides to total lipids ratio in medium HDL	7	7	3	7
Triglyceride levels in small VLDL	7	7	1	7
Plasma free amino acid levels (adjusted for twenty other PFAAs)	3	7		3
Plasma free amino acid levels (adjusted for one other PFAA)		7
Alzheimer‚Äôs disease polygenic risk score (upper quantile vs lower quantile)	5	6	16	5
Balding type 1	5	6	12	5
Cataracts	6	6	11	6
Insulin-like growth factor 1 levels	4	6	11	4
Hay fever and/or eczema	6	6	10	6
Total body bone mineral density	6	6	10	6
Waist circumference adjusted for BMI in non-smokers	6	6	10	6
Smoking status (ever vs never smokers)	5	6	10	5
Central corneal thickness (MTAG)	3	6	9	3
Migraine	6	6	8	6
Type 2 diabetes (adjusted for BMI)	6	6	8	6
General risk tolerance (MTAG)	6	6	7	6
N-glycan levels	6	6	6	6
Obesity	8	6	5	8
Alcohol consumption	6	6	5	6
Coronary artery disease (myocardial infarction, percutaneous transluminal coronary angioplasty, coronary artery bypass grafting, angina or chromic ischemic heart disease)	6	6	5	6
Worry too long after an embarrassing experience	6	6	5	6
Alzheimer's disease or educational attainment (pleiotropy)	6	6	4	6
Diastolic blood pressure x smoking status (current vs non-current) interaction (2df test)	6	6	4	6
Diastolic blood pressure x smoking status (ever vs never) interaction (2df test)	6	6	4	6
Systolic blood pressure x smoking status (current vs non-current) interaction (2df test)	6	6	4	6
Systolic blood pressure x smoking status (ever vs never) interaction (2df test)	6	6	4	6
Cholesterol levels in very large VLDL	6	6	3	6
Cholesterol to total lipids ratio in medium HDL	6	6	3	6
Nonatopic asthma	6	6	3	6
Phospholipid levels in VLDL	6	6	3	6
Ratio of polyunsaturated fatty acids to total fatty acids	6	6	3	6
Total lipid levels in VLDL	6	6	3	6
Triglycerides to total lipids ratio in small HDL	6	6	3	6
Alopecia areata	5	6	3	5
Cognitive ability (MTAG)	5	6	3	5
Irritable mood	2	6	3	2
Autoimmune traits	6	6	2	6
Concentration of large VLDL particles	6	6	2	6
Concentration of very large VLDL particles	6	6	2	6
Free cholesterol levels in large VLDL	6	6	2	6
Monounsaturated fatty acid levels	6	6	2	6
Pancreatic cancer	6	6	2	6
Phospholipid levels in large VLDL	6	6	2	6
Phospholipid levels in very large VLDL	6	6	2	6
Total lipid levels in large VLDL	6	6	2	6
Total lipid levels in very large VLDL	6	6	2	6
Triglyceride levels in VLDL	6	6	2	6
Triglyceride levels x alcohol consumption (drinkers vs non-drinkers) interaction (2df)	6	6	2	6
Sleep duration	4	6	2	4
Ratio of triglycerides to phosphoglycerides	6	6	1	6
Triglyceride levels in small LDL	6	6	1	6
Triglyceride levels in very small VLDL	6	6	1	6
Femoral hernia	6	6		6
Iron status biomarkers	6	6		6
Waist-to-hip ratio adjusted for BMI (recessive genetic model)	6	6		6
Liver iron content	5	6		5
Optic cup area	5	5	18	5
Gamma glutamyl transferase levels	4	5	15	4
Hypertension	4	5	14	4
Medication use (drugs used in diabetes)	5	5	12	5
Tonsillectomy	5	5	11	5
Varicose veins	5	5	10	5
FEV1	5	5	8	5
Granulocyte percentage of myeloid white cells	5	5	8	5
Cholesteryl ester levels in large HDL	5	5	7	5
Concentration of large HDL particles	5	5	7	5
Parkinson's disease	5	5	7	5
Depressive symptoms	6	5	6	6
Cystatin-SA levels	5	5	6	5
Multisite chronic pain	5	5	6	5
Allergic rhinitis	4	5	6	4
Osteoarthritis (hip)	4	5	6	4
Concentration of large LDL particles	5	5	5	5
Phospholipid levels in small LDL	5	5	5	5
Protein quantitative trait loci	5	5	5	5
Leisure sedentary behaviour (television watching)	4	5	5	4
Concentration of VLDL particles	5	5	4	5
Concentration of medium VLDL particles	5	5	4	5
Cortical surface area (MOSTest)	5	5	4	5
Free cholesterol levels in VLDL	5	5	4	5
Free cholesterol levels in medium VLDL	5	5	4	5
Phospholipid levels in medium VLDL	5	5	4	5
Ratio of omega-6 fatty acids to total fatty acids	5	5	4	5
VLDL cholesterol levels	5	5	4	5
White blood cell count (neutrophil)	5	5	4	5
Smoking initiation	4	5	4	4
Central corneal thickness		5	4
Cholesterol to total lipids ratio in large HDL	5	5	3	5
Cholesteryl ester levels in small VLDL	5	5	3	5
Phospholipids to total lipids ratio in large VLDL	5	5	3	5
Ratio of apolipoprotein B to apolipoprotein A1 levels	5	5	3	5
Ratio of polyunsaturated fatty acids to monounsaturated fatty acids	5	5	3	5
Remnant cholesterol (non-HDL, non-LDL -cholesterol)	5	5	3	5
Dentures	4	5	3	4
Number of decayed, missing and filled tooth surfaces or use of dentures	4	5	3	4
Risk-taking behavior (multivariate analysis)	4	5	3	4
Allergic disease (asthma, hay fever and/or eczema) (age of onset)	5	5	2	5
Ankylosing spondylitis	5	5	2	5
Cholesterol levels in medium VLDL	5	5	2	5
Cholesteryl ester levels in very large VLDL	5	5	2	5
Concentration of small VLDL particles	5	5	2	5
Lung function (FEV1)	5	5	2	5
Medication use (adrenergics, inhalants)	5	5	2	5
Phospholipid levels in chylomicrons and extremely large VLDL	5	5	2	5
Schizophrenia vs ADHD (ordinary least squares (OLS))	5	5	2	5
Triglyceride levels in IDL	5	5	2	5
Triglyceride levels in LDL	5	5	2	5
Triglyceride levels in large VLDL	5	5	2	5
Triglyceride levels in medium LDL	5	5	2	5
Triglyceride levels in small HDL	5	5	2	5
Triglyceride levels in very large VLDL	5	5	2	5
Risk-taking tendency (4-domain principal component model)	4	5	2	4
Juvenile idiopathic arthritis (oligoarticular or rheumatoid factor-negative polyarticular)	5	5	1	5
Medication use (glucocorticoids)	5	5	1	5
Triglyceride levels in medium VLDL	5	5	1	5
Anthropometric traits in newborns	5	5		5
BMI at 1 year old	5	5		5
Body mass index in physically inactive individuals	5	5		5
Non-lobar intracerebral hemorrhage (MTAG)	5	5		5
Triglycerides to total lipids ratio in large HDL	5	5		5
Number of sexual partners	4	5		4
Serum thyroid-stimulating hormone levels	4	5		4
Plasma free amino acid levels	2	5		2
Post bronchodilator FEV1/FVC ratio	4	4	93	4
Medication use (agents acting on the renin-angiotensin system)	2	4	20	2
Cognitive aspects of educational attainment	3	4	18	3
Morning person	1	4	18	1
PR interval	3	4	13	3
Spherical equivalent	4	4	11	4
Feeling worry	5	4	8	5
White blood cell count (basophil)	2	4	8	2
Cigarettes smoked per day (MTAG)	4	4	7	4
Free cholesterol to total lipids ratio in medium HDL	4	4	7	4
Aerodigestive squamous cell cancer (pleiotropy)	4	4	6	4
Bitter alcoholic beverage consumption	4	4	6	4
Cholesterol levels in very large HDL	4	4	6	4
Cholesteryl ester levels in very large HDL	4	4	6	4
Chronic obstructive pulmonary disease	4	4	6	4
Coronary artery disease or fibrinogen levels (pleiotropy)	4	4	6	4
Lung cancer in ever smokers	4	4	6	4
Bipolar I disorder	3	4	6	3
General factor of neuroticism	3	4	6	3
Neutrophil percentage of granulocytes	3	4	6	3
Alcohol use disorder (consumption score)	4	4	5	4
Blood protein levels in cardiovascular risk	4	4	5	4
Cholesterol to total lipids ratio in very small VLDL	4	4	5	4
Cholesteryl ester levels in HDL	4	4	5	4
Cholesteryl esters to total lipids ratio in medium VLDL	4	4	5	4
Coronary artery disease or plasminogen activator inhibitor 1 levels (pleiotropy)	4	4	5	4
Coronary artery disease or von Willebrand factor levels (pleiotropy)	4	4	5	4
Phospholipid levels in large HDL	4	4	5	4
Phospholipids to total lipids ratio in medium HDL	4	4	5	4
Respiratory diseases	4	4	5	4
Total lipid levels in large HDL	4	4	5	4
Adventurousness	5	4	4	5
Parental longevity (mother's age at death or mother's attained age)	5	4	4	5
Well-being spectrum (multivariate analysis)	5	4	4	5
Cholesteryl ester levels in VLDL	4	4	4	4
Cholesteryl ester levels in medium LDL	4	4	4	4
Coffee consumption	4	4	4	4
Coronary artery disease or factor VIII levels (pleiotropy)	4	4	4	4
Coronary artery disease or tissue plasminogen activator levels (pleiotropy)	4	4	4	4
Diffuse cutaneous systemic sclerosis	4	4	4	4
Fibrinogen levels	4	4	4	4
Free cholesterol levels in small LDL	4	4	4	4
Linoleic acid levels	4	4	4	4
Phosphatidylcholine-O_44:5_[M+OAc]1-/Phosphatidylcholine-P_44:4_[M+OAc]1- levels	4	4	4	4
Phospholipid levels in small VLDL	4	4	4	4
Total cholesterol minus HDL-C levels	4	4	4	4
Eosinophil percentage of granulocytes	3	4	4	3
Blood metabolite levels	2	4	4	2
Coffee consumption (cups per day)	5	4	3	5
Cerebrospinal fluid biomarker levels	4	4	3	4
Cholesterol levels in chylomicrons and extremely large VLDL	4	4	3	4
Cholesterol levels in small VLDL	4	4	3	4
Cholesteryl ester levels in chylomicrons and extremely large VLDL	4	4	3	4
Cholesteryl esters to total lipids ratio in very large VLDL	4	4	3	4
Chronic elevation of alanine aminotransferase (cALT) levels	4	4	3	4
Free cholesterol levels in small VLDL	4	4	3	4
Free cholesterol to total lipids ratio in large LDL	4	4	3	4
Haemorrhoidal disease	4	4	3	4
Limited cutaneous systemic scleroderma	4	4	3	4
Mental health study participation (completed survey)	4	4	3	4
Ratio of monounsaturated fatty acids to total fatty acids	4	4	3	4
Total lipid levels in small VLDL	4	4	3	4
White matter hyperintensity volume	4	4	3	4
Oily fish consumption	3	4	3	3
Diverticular disease	5	4	2	5
Allergic disease (asthma, hay fever and/or eczema) (multivariate analysis)	4	4	2	4
Asthma (adult onset)	4	4	2	4
Asthma onset (childhood vs adult)	4	4	2	4
Atrial fibrillation (MTAG)	4	4	2	4
Childhood asthma with severe exacerbations	4	4	2	4
Cholesterol levels in large VLDL	4	4	2	4
Cholesteryl ester levels in large VLDL	4	4	2	4
Concentration of HDL particles	4	4	2	4
Pediatric autoimmune diseases	4	4	2	4
Ratio of linoleic acid to total fatty acids	4	4	2	4
Saturated fatty acid levels	4	4	2	4
Total fatty acid levels	4	4	2	4
Triglyceride levels in HDL	4	4	2	4
Triglyceride levels in medium HDL	4	4	2	4
Triglyceride levels x alcohol consumption (regular vs non-regular drinkers) interaction (2df)	4	4	2	4
hemolysis of donated blood (osmotic)	4	4	2	4
Prostate cancer (SNP x SNP interaction)	3	4	2	3
Smoking status (current vs never)	3	4	2	3
Primary biliary cirrhosis	6	4	1	6
Cholesteryl esters to total lipids ratio in large HDL	4	4	1	4
Cholesteryl esters to total lipids ratio in small HDL	4	4	1	4
Concentration of medium HDL particles	4	4	1	4
Creatine kinase levels	4	4	1	4
Free cholesterol to total lipids ratio in medium LDL	4	4	1	4
Hyperthyroidism	4	4	1	4
Phospholipids to total lipids ratio in large HDL	4	4	1	4
Self-reported allergy	4	4	1	4
Triglyceride levels in current drinkers	4	4	1	4
Triglyceride levels in large LDL	4	4	1	4
Triglycerides to total lipids ratio in very large HDL	4	4	1	4
Waist-to-hip ratio adjusted for BMI x sex interaction	4	4	1	4
Urinary sodium excretion	3	4	1	3
Mean arterial pressure x depressive symptoms interaction (2df test)	2	4	1	2
Free thyroxine concentration	5	4		5
Anxiety	4	4		4
BMI at 2 years old	4	4		4
BMI at 3 years old	4	4		4
BMI at 5 years old	4	4		4
BMI at 7 years old	4	4		4
BMI at 8 years old	4	4		4
Body mass index (adult)	4	4		4
COVID-19 (critical illness vs population)	4	4		4
Experiencing mood swings	4	4		4
Factor VIII levels	4	4		4
Haptoglobin levels	4	4		4
Pediatric asthma	4	4		4
Putamen volume	4	4		4
White matter hyperintensities	4	4		4
White matter integrity (fractional anisotropy)	3	4		3
Serum levels of protein ICAM4	2	4		2
Glaucoma (primary open-angle)	3	3	15	3
Cognitive performance	2	3	13	2
Immature fraction of reticulocytes	3	3	12	3
Alzheimer's disease or gastroesophageal reflux disease	3	3	10	3
Basophil percentage of white cells	2	3	10	2
Vertical cup-disc ratio (multi-trait analysis)	2	3	10	2
Medication use (beta blocking agents)	1	3	9	1
Mosquito bite size	3	3	8	3
Optic disc size	3	3	8	3
Low tan response		3	8
Mitochondrial DNA levels	4	3	7	4
Phospholipid levels in very large HDL	3	3	7	3
Average diameter for HDL particles	3	3	6	3
Concentration of very large HDL particles	3	3	6	3
Corneal curvature	3	3	6	3
Knee osteoarthritis	3	3	6	3
Spherical equivalent or myopia (age of diagnosis)	3	3	6	3
Total lipid levels in very large HDL	3	3	6	3
Mitochondrial DNA copy number	4	3	5	4
Birth weight (MTAG)	3	3	5	3
Free cholesterol to total lipids ratio in very large HDL	3	3	5	3
Gastroesophageal reflux disease	3	3	5	3
Macular thickness	3	3	5	3
Periventricular white matter hyperintensities	3	3	5	3
Phospholipid levels in IDL	3	3	5	3
Polycystic ovary syndrome	3	3	5	3
Uric acid levels	3	3	5	3
Coronary artery disease or factor VII levels (pleiotropy)	4	3	4	4
Birth length (MTAG)	3	3	4	3
Blood glucose levels	3	3	4	3
Cholesterol levels in small LDL	3	3	4	3
Cholesteryl ester levels in LDL	3	3	4	3
Cholesteryl ester levels in medium VLDL	3	3	4	3
Concentration of LDL particles	3	3	4	3
Coronary artery disease or factor XI levels (pleiotropy)	3	3	4	3
HDL cholesterol levels x long total sleep time interaction (2df test)	3	3	4	3
Myeloid white cell count	3	3	4	3
Parkinson's disease or first degree relation to individual with Parkinson's disease	3	3	4	3
Systemic seropositive rheumatic diseases (Systemic sclerosis or systemic lupus erythematosus or rheumatoid arthritis or idiopathic inflammatory myopathies)	3	3	4	3
Total lipid levels in IDL	3	3	4	3
Total lipid levels in lipoprotein particles	3	3	4	3
Total lipid levels in small LDL	3	3	4	3
Waist-to-hip ratio adjusted for BMI (joint analysis main effects and smoking interaction)	3	3	4	3
Waist-to-hip ratio adjusted for BMI x sex x age interaction (4df test)	3	3	4	3
Depressed affect	2	3	4	2
Schizophrenia vs autism spectrum disorder (ordinary least squares (OLS))	4	3	3	4
Acetate levels	3	3	3	3
Cholesterol levels in IDL	3	3	3	3
Cholesterol levels in very small VLDL	3	3	3	3
Cholesterol to total lipids ratio in very large VLDL	3	3	3	3
Cholesteryl ester levels in small LDL	3	3	3	3
Cholesteryl ester levels in very small VLDL	3	3	3	3
Concentration of IDL particles	3	3	3	3
Degree of unsaturation	3	3	3	3
Familial combined hyperlipidemia defined by Consensus criteria	3	3	3	3
Familial combined hyperlipidemia defined by Dutch criteria	3	3	3	3
Free cholesterol levels in HDL	3	3	3	3
Gastric cancer	3	3	3	3
Graves' disease	3	3	3	3
HDL cholesterol x physical activity interaction (2df test)	3	3	3	3
Phospholipid levels in very small VLDL	3	3	3	3
Schizophrenia vs anorexia nervosa (ordinary least squares (OLS))	3	3	3	3
Serum levels of protein CST1	3	3	3	3
Sex hormone-binding globulin levels in premenopausal women	3	3	3	3
Sum eosinophil basophil counts	3	3	3	3
Total lipid levels in HDL	3	3	3	3
Total lipid levels in medium VLDL	3	3	3	3
Total phospholipid levels in lipoprotein particles	3	3	3	3
Triglycerides to total lipids ratio in large VLDL	3	3	3	3
Cognitive ability	2	3	3	2
Ratio of docosahexaenoic acid to total fatty acid levels	2	3	3	2
Systolic blood pressure x alcohol consumption interaction (2df test)	1	3	3	1
Male puberty timing (age at voice breaking MTAG)	4	3	2	4
Anxiety/tension (special factor of neuroticism)	3	3	2	3
Asthma with severe exacerbations	3	3	2	3
Autoimmune thyroid disease	3	3	2	3
Cholesterol levels in medium HDL	3	3	2	3
Cholesteryl ester levels in medium HDL	3	3	2	3
Concentration of chylomicrons and extremely large VLDL particles	3	3	2	3
Concentration of small LDL particles	3	3	2	3
Free cholesterol levels in medium HDL	3	3	2	3
Major depression and alcohol dependence	3	3	2	3
Phosphatidylcholine levels	3	3	2	3
Phospholipid levels in HDL	3	3	2	3
Pubertal anthropometrics	3	3	2	3
Sarcoidosis	3	3	2	3
Small cell lung carcinoma	3	3	2	3
Total free cholesterol levels	3	3	2	3
Total lipid levels in chylomicrons and extremely large VLDL	3	3	2	3
Triglyceride levels in chylomicrons and extremely large VLDL	3	3	2	3
Waist-to-hip ratio adjusted for BMI in non-smokers	3	3	2	3
White matter hyperintensity volume (adjusted for hypertension)	3	3	2	3
beta-nerve growth factor levels	3	3	2	3
Pork consumption	2	3	2	2
Sj√∂gren's syndrome	2	3	2	2
Arthritis (juvenile idiopathic)	3	3	1	3
Asthma (age of onset)	3	3	1	3
Asthma (moderate or severe)	3	3	1	3
Autoimmune traits (pleiotropy)	3	3	1	3
Average diameter for VLDL particles	3	3	1	3
Cannabis dependence symptom count	3	3	1	3
Cardioembolic stroke (MTAG)	3	3	1	3
Carpal tunnel syndrome	3	3	1	3
Childhood obesity	3	3	1	3
Cholesteryl esters to total lipids ratio in medium LDL	3	3	1	3
Feeling miserable	3	3	1	3
Free cholesterol to total lipids ratio in very small VLDL	3	3	1	3
Lean body mass	3	3	1	3
Meat-related diet	3	3	1	3
Non-small cell lung cancer	3	3	1	3
Pancreas volume	3	3	1	3
Primary sclerosing cholangitis	3	3	1	3
Psoriasis or type 2 diabetes (trans-disease meta-analysis)	3	3	1	3
Total concentration of lipoprotein particles	3	3	1	3
Total omega-6 fatty acid levels	3	3	1	3
Triglyceride levels in very large HDL	3	3	1	3
White matter hyperintensity volume x hypertension interaction (2df)	3	3	1	3
Allergy	2	3	1	2
Intracranial aneurysm	2	3	1	2
Mouth ulcers	2	3	1	2
Type 2 diabetes or prostate cancer (pleiotropy)	2	3	1	2
Mosaic loss of chromosome Y (Y chromosome dosage)	5	3		5
BMI at 1.5 years old	3	3		3
BMI at 8 months old	3	3		3
Body mass index variance	3	3		3
Breast cancer (estrogen-receptor negative)	3	3		3
COVID-19 (hospitalized vs population)	3	3		3
Caudate nucleus volume	3	3		3
Eosinophilic esophagitis	3	3		3
Feeling guilty	3	3		3
Immune reponse to smallpox (secreted IL-2)	3	3		3
Lysophosphatidylcholine levels	3	3		3
Parental longevity (father's age at death or father's attained age)	3	3		3
Peginterferon alfa-2a treatment response in chronic hepatitis B infection	3	3		3
Principal component-derived dietary pattern 3	3	3		3
Problematic alcohol use (MTAG)	3	3		3
Psoriasis vulgaris	3	3		3
Red blood cell traits	3	3		3
Strep throat	3	3		3
Survival in pancreatic cancer	3	3		3
Thyroid volume	3	3		3
Urinary metabolites (H-NMR features)	3	3		3
Venous thromboembolism or fibrinogen levels (pleiotropy)	3	3		3
interleukin-18 receptor 1 levels	3	3		3
Selective IgA deficiency	2	3		2
Feeling tense	1	3		1
White matter microstructure (axial diusivities)	1	3		1
Colorectal cancer	1	2	17	1
Uterine fibroids	2	2	10	2
Blond vs. brown/black hair color	2	2	9	2
Morningness	2	2	9	2
Non-melanoma skin cancer	2	2	8	2
Medication use (diuretics)		2	8
Coronary heart disease	3	2	7	3
Free cholesterol levels in large HDL	3	2	7	3
Descending thoracic aortic diameter	2	2	7	2
Free testosterone levels	2	2	7	2
Glucose levels	2	2	7	2
Menopause (age at onset)	1	2	7	1
Free cholesterol to total lipids ratio in large HDL	2	2	6	2
Leisure screen time	2	2	6	2
Verbal-numerical reasoning	2	2	6	2
Corneal resistance factor		2	6
Biological sex	3	2	5	3
Cholesteryl esters to total lipids ratio in very small VLDL	3	2	5	3
Free cholesterol levels in very large HDL	3	2	5	3
Bone stiffness index	2	2	5	2
C-reactive protein levels or LDL-cholesterol levels (pleiotropy)	2	2	5	2
Common executive function	2	2	5	2
Ease of getting up in the morning	2	2	5	2
Estradiol levels	2	2	5	2
LDL cholesterol levels x long total sleep time interaction (2df test)	2	2	5	2
Low myopia vs hyperopia	2	2	5	2
Phosphatidylcholine_32:2_[M+H]1+/Phosphatidylethanolamine_35:2_[M+H]1+/Phosphatidate_37:3_[M+NH4]1+ levels	2	2	5	2
Vitiligo	2	2	5	2
Childhood ear infection	1	2	5	1
AFP levels	2	2	4	2
Aspartate aminotransferase to alanine aminotransferase ratio	2	2	4	2
Breast size	2	2	4	2
Cancer (pleiotropy)	2	2	4	2
Cholesterol levels in large LDL	2	2	4	2
Cholesterol levels in medium LDL	2	2	4	2
Cholesteryl ester levels in large LDL	2	2	4	2
Chronic lymphocytic leukemia	2	2	4	2
Clinical LDL cholesterol levels	2	2	4	2
Cognitive function	2	2	4	2
Folate pathway vitamin levels	2	2	4	2
Free cholesterol levels in IDL	2	2	4	2
Free cholesterol levels in LDL	2	2	4	2
Free cholesterol levels in large LDL	2	2	4	2
Free cholesterol levels in medium LDL	2	2	4	2
Free cholesterol levels in very small VLDL	2	2	4	2
Free cholesterol to total lipids ratio in small VLDL	2	2	4	2
Longevity	2	2	4	2
Omega-6 fatty acid levels	2	2	4	2
Phospholipid levels in LDL	2	2	4	2
Phospholipid levels in large LDL	2	2	4	2
Phospholipid levels in medium LDL	2	2	4	2
Phospholipids to total lipids ratio in small VLDL	2	2	4	2
Polyunsaturated fatty acid levels	2	2	4	2
Retinal vascular fractal density	2	2	4	2
Total lipid levels in LDL	2	2	4	2
Total lipid levels in large LDL	2	2	4	2
Total lipid levels in medium LDL	2	2	4	2
Total lipid levels in very small VLDL	2	2	4	2
Youthful appearance (self-reported)	2	2	4	2
Blood metabolite ratios	1	2	4	1
Nasal polyps	1	2	4	1
Feeling hurt	3	2	3	3
Average diameter for LDL particles	2	2	3	2
Cholesterol to total lipids ratio in IDL	2	2	3	2
Cholesterol to total lipids ratio in medium VLDL	2	2	3	2
Cholesteryl ester levels in IDL	2	2	3	2
Concentration of medium LDL particles	2	2	3	2
Fatty acid(20:4)_[M-H]1- levels	2	2	3	2
Fatty acid(22:4)_[M-H]1- levels	2	2	3	2
Fatty acid(22:5)_[M-H]1- levels	2	2	3	2
Free cholesterol to total lipids ratio in small HDL	2	2	3	2
Free cholesterol to total lipids ratio in small LDL	2	2	3	2
Household income	2	2	3	2
Magnesium levels	2	2	3	2
Phospholipids to total lipids ratio in very small VLDL	2	2	3	2
Sum basophil neutrophil counts	2	2	3	2
Sum neutrophil eosinophil counts	2	2	3	2
Triglycerides to total lipids ratio in IDL	2	2	3	2
Triglycerides to total lipids ratio in medium VLDL	2	2	3	2
White matter microstructure (mode of anisotropy)	2	2	3	2
Carotid intima media thickness (maximum)	1	2	3	1
Carotid intima media thickness (mean)	1	2	3	1
Carotid intima media thickness (minimum)	1	2	3	1
Osteoarthritis of the hip or knee	1	2	3	1
Diastolic blood pressure x alcohol consumption interaction (2df test)		2	3
Acute lymphoblastic leukemia (childhood)	2	2	2	2
Androgen levels	2	2	2	2
BMI in smokers	2	2	2	2
COVID-19 or hypertension (pleiotropy)	2	2	2	2
Caffeine consumption from coffee or tea	2	2	2	2
Cataracts (operation)	2	2	2	2
Cholesterol levels in small HDL	2	2	2	2
Cholesteryl esters to total lipids ratio in large LDL	2	2	2	2
Chromosomal aberration frequency (chromosome type)	2	2	2	2
Colon polyp	2	2	2	2
Cystatin-F levels	2	2	2	2
Essential hypertension (time to event)	2	2	2	2
Excessive alcohol consumption	2	2	2	2
Facial morphology (factor 15, philtrum width)	2	2	2	2
Free cholesterol levels in chylomicrons and extremely large VLDL	2	2	2	2
Free cholesterol to total lipids ratio in IDL	2	2	2	2
Free cholesterol to total lipids ratio in very large VLDL	2	2	2	2
Granulocyte count	2	2	2	2
Hashimoto thyroiditis	2	2	2	2
Hodgkin's lymphoma	2	2	2	2
LDL cholesterol x physical activity interaction (2df test)	2	2	2	2
Lipid traits (pleiotropy) (HIPO component 1)	2	2	2	2
Liver enzyme levels	2	2	2	2
Metabolic traits	2	2	2	2
Neuritic plaque	2	2	2	2
Pancreatic ductal adenocarcinoma	2	2	2	2
Pelvic organ prolapse	2	2	2	2
Phosphoglycerides levels	2	2	2	2
Phospholipids to total lipids ratio in medium VLDL	2	2	2	2
Serum levels of protein CST2	2	2	2	2
Smoking behaviour (cigarettes smoked per day)	2	2	2	2
Systemic lupus erythematosus and Systemic sclerosis	2	2	2	2
Systemic lupus erythematosus or rheumatoid arthritis	2	2	2	2
Systemic sclerosis (anti-topoisomerase-positive)	2	2	2	2
Total esterified cholesterol levels	2	2	2	2
Triglycerides to total lipids ratio in small LDL	2	2	2	2
Trunk fat mass	2	2	2	2
Cutaneous melanoma or hair colour	1	2	2	1
Docosahexaenoic acid levels	1	2	2	1
Prostate-specific antigen levels	1	2	2	1
Direct bilirubin levels		2	2
Bipolar disorder or major depressive disorder	3	2	1	3
Neuroticism conditioned on Townsend deprivation index (multi-trait conditioning and joint analysis)	3	2	1	3
Adult asthma	2	2	1	2
Albumin-globulin ratio	2	2	1	2
Alcohol use disorder	2	2	1	2
Asthma or allergic disease (pleiotropy)	2	2	1	2
Body fat mass	2	2	1	2
Body fat percentage or coronary artery disease (MTAG)	2	2	1	2
COVID-19 (critical illness vs population or mild symptoms)	2	2	1	2
Cerebellum cortex volume	2	2	1	2
Cervical cancer	2	2	1	2
Childhood body fatness	2	2	1	2
Cholelithiasis	2	2	1	2
Cholesterol to total lipids ratio in small HDL	2	2	1	2
Cholesteryl ester_20:5_[M+NH4]1+ levels	2	2	1	2
Cholesteryl ester_22:6_[M+NH4]1+ levels	2	2	1	2
Cholesteryl esters to total lipids ratio in IDL	2	2	1	2
Chronic obstructive pulmonary disease or high blood pressure (pleiotropy)	2	2	1	2
DNA methylation PhenoAge acceleration	2	2	1	2
Diacylglycerol_38:3_[M+H-H2O]1+ levels	2	2	1	2
Diacylglycerol_38:4_[M+H-H2O]1+ levels	2	2	1	2
Diacylglycerol_38:5_[M+H-H2O]1+ levels	2	2	1	2
Early-onset ischemic stroke	2	2	1	2
Erectile dysfunction	2	2	1	2
Essential tremor	2	2	1	2
Fasting blood insulin	2	2	1	2
Feeling fed-up	2	2	1	2
Free cholesterol to total lipids ratio in large VLDL	2	2	1	2
Glycoprotein acetyls levels	2	2	1	2
Goiter	2	2	1	2
Heart rate variability traits (RMSSD)	2	2	1	2
IgM levels	2	2	1	2
Lysophosphatidylcholine_20:4_[M+H]1+ levels	2	2	1	2
Lysophosphatidylethanolamine_18:2_[M-H]1- levels	2	2	1	2
Lysophosphatidylethanolamine_20:4_[M-H]1- levels	2	2	1	2
Lysophosphatidylethanolamine_22:4_[M-H]1- levels	2	2	1	2
Oral cavity and pharyngeal cancer	2	2	1	2
Pallidum volume	2	2	1	2
Percent mammographic density	2	2	1	2
Phosphatidylcholine-O_36:4_[M+H]1+/Phosphatidylcholine-P_36:3_[M+H]1+ levels	2	2	1	2
Phosphatidylcholine-O_38:5_[M+H]1+/Phosphatidylcholine-P_38:4_[M+H]1+ levels	2	2	1	2
Phosphatidylcholine-O_40:5_[M+H]1+/Phosphatidylcholine-P_40:4_[M+H]1+ levels	2	2	1	2
Phosphatidylcholine-O_44:5_[M+H]1+/Phosphatidylcholine-P_44:4_[M+H]1+ levels	2	2	1	2
Phosphatidylcholine_31:2_[M+H]1+/Phosphatidylethanolamine_34:2_[M+H]1+/Phosphatidate_36:3_[M+NH4]1+ levels	2	2	1	2
Phosphatidylcholine_32:0_[M+H]1+/Phosphatidylethanolamine_35:0_[M+H]1+/Phosphatidate_37:1_[M+NH4]1+ levels	2	2	1	2
Phosphatidylcholine_34:2_[M+H]1+/Phosphatidylethanolamine_37:2_[M+H]1+/Phosphatidate_39:3_[M+NH4]1+ levels	2	2	1	2
Phosphatidylcholine_34:2_[M+OAc]1-/Phosphatidylserine_38:1_[M-H]1- levels	2	2	1	2
Phosphatidylcholine_34:3_[M+H]1+/Phosphatidylethanolamine_37:3_[M+H]1+/Phosphatidate_39:4_[M+NH4]1+ levels	2	2	1	2
Phosphatidylcholine_35:2_[M+H]1+/Phosphatidylethanolamine_38:2_[M+H]1+/Phosphatidate_40:3_[M+NH4]1+ levels	2	2	1	2
Phosphatidylcholine_35:3_[M+H]1+/Phosphatidylethanolamine_38:3_[M+H]1+/Phosphatidate_40:4_[M+NH4]1+ levels	2	2	1	2
Phosphatidylcholine_35:4_[M+H]1+/Phosphatidylethanolamine_38:4_[M+H]1+/Phosphatidate_40:5_[M+NH4]1+ levels	2	2	1	2
Phosphatidylcholine_36:3_[M+H]1+/Phosphatidylethanolamine_39:3_[M+H]1+/Phosphatidate_41:4_[M+NH4]1+ levels	2	2	1	2
Phosphatidylcholine_37:4_[M+H]1+/Phosphatidylethanolamine_40:4_[M+H]1+/Phosphatidate_42:5_[M+NH4]1+ levels	2	2	1	2
Phosphatidylcholine_38:5_[M+H]1+/Phosphatidylethanolamine_41:5_[M+H]1+/Phosphatidate_43:6_[M+NH4]1+ levels	2	2	1	2
Phosphatidylcholine_40:4_[M+H]1+/Phosphatidylethanolamine_43:4_[M+H]1+ levels	2	2	1	2
Phosphatidylcholine_40:5_[M+H]1+ levels	2	2	1	2
Phosphatidylcholine_42:4_[M+OAc]1- levels	2	2	1	2
Phosphatidylethanolamine-O_36:5_[M-H]1-/Phosphatidylethanolamine-P_36:4_[M-H]1- levels	2	2	1	2
Phosphatidylethanolamine-O_38:3_[M-H]1-/Phosphatidylethanolamine-P_38:2_[M-H]1- levels	2	2	1	2
Phosphatidylethanolamine-O_38:5_[M-H]1-/Phosphatidylethanolamine-P_38:4_[M-H]1- levels	2	2	1	2
Phosphatidylethanolamine-O_40:5_[M-H]1-/Phosphatidylethanolamine-P_40:4_[M-H]1- levels	2	2	1	2
Phosphatidylethanolamine_34:2_[M-H]1- levels	2	2	1	2
Phosphatidylethanolamine_35:2_[M-H]1- levels	2	2	1	2
Phosphatidylethanolamine_36:2_[M-H]1- levels	2	2	1	2
Phosphatidylethanolamine_36:3_[M-H]1- levels	2	2	1	2
Phosphatidylethanolamine_38:3_[M-H]1- levels	2	2	1	2
Phosphatidylethanolamine_38:4_[M-H]1- levels	2	2	1	2
Phosphatidylethanolamine_38:5_[M-H]1- levels	2	2	1	2
Phosphatidylethanolamine_39:4_[M-H]1- levels	2	2	1	2
Phosphatidylglycerol_35:3_[M-H]1- levels	2	2	1	2
Phosphatidylinositol-O_36:0_[M-H]1- levels	2	2	1	2
Phosphatidylinositol_34:0_[M+H]1+ levels	2	2	1	2
Phosphatidylinositol_36:2_[M-H]1- levels	2	2	1	2
Phosphatidylinositol_36:3_[M-H]1- levels	2	2	1	2
Phosphatidylserine_40:5_[M+H]1+/Phosphatidylglycerol_40:7_[M+NH4]1+ levels	2	2	1	2
Phospholipid levels in medium HDL	2	2	1	2
Phospholipids to total lipids ratio in medium LDL	2	2	1	2
Psoriasis or type 2 diabetes (trans-disease meta-analysis)(opposite effect)	2	2	1	2
Rosacea symptom severity	2	2	1	2
Schizophrenia vs bipolar disorder (ordinary least squares (OLS))	2	2	1	2
Serum levels of protein CST7	2	2	1	2
Smoking behaviour (cigarette pack-years)	2	2	1	2
Smoking cessation	2	2	1	2
Total cholines levels	2	2	1	2
Triacylglycerol_56:6_[M+NH4]1+ levels	2	2	1	2
Triacylglycerol_58:10_[M+NH4]1+ levels	2	2	1	2
Triglyceride levels in large HDL	2	2	1	2
Vitamin D levels	2	2	1	2
F-strong flavour liking (derived food-liking factor)	1	2	1	1
F-strong vegetable liking (derived food-liking factor)	1	2	1	1
Percent liver fat	1	2	1	1
Sensitivity to environmental stress and adversity	1	2	1	1
Decanoylcarnitine levels		2	1
Dodecanoylcarnitine levels		2	1
Tetradecenoylcarnitine levels		2	1
Tyrosine levels	3	2		3
Acceptance of an invitation to participate in a mental health questionnaire	2	2		2
Activated partial thromboplastin time	2	2		2
Alanine aminotransferase (ALT) levels after remission induction therapy in actute lymphoblastic leukemia (ALL)	2	2		2
Apolipoprotein A-IV levels	2	2		2
Asthma (time to onset)	2	2		2
Asthma and hay fever	2	2		2
BMI at 6 months old	2	2		2
Body fat percentage variance	2	2		2
Body mass index and type 2 diabetes (pairwise)	2	2		2
Body mass index in non-asthmatics	2	2		2
Celiac disease or Rheumatoid arthritis	2	2		2
Citrulline levels	2	2		2
Cortical amyloid beta load	2	2		2
Creatine kinase levels in statin users	2	2		2
DNA methylation variation (age effect)	2	2		2
Emphysema imaging phenotypes	2	2		2
End-stage coagulation	2	2		2
Erythrocyte sedimentation rate	2	2		2
Fractional exhaled nitric oxide (childhood)	2	2		2
Glycated haemoglobin HbA1c levels adjusted for BMI	2	2		2
Heparin cofactor 2 levels	2	2		2
IgE levels	2	2		2
Lactate dehydrogenase levels	2	2		2
Lacunar stroke	2	2		2
Language functional connectivity	2	2		2
Lipoprotein-associated phospholipase A2 activity and mass	2	2		2
Maximum creatine kinase levels in statin users	2	2		2
Myeloproliferative neoplasms	2	2		2
Obese vs. thin	2	2		2
Obesity (extreme)	2	2		2
Opioid use disorder (MTAG)	2	2		2
Peripheral artery disease	2	2		2
Phosphatidylcholine_37:3_[M+OAc]1-/Phosphatidylserine_41:2_[M-H]1- levels	2	2		2
Phosphatidylcholine_38:3_[M+H]1+/Phosphatidylethanolamine_41:3_[M+H]1+/Phosphatidate_43:4_[M+NH4]1+ levels	2	2		2
Platelet-activating factor levels	2	2		2
Postoperative survival time in hepatocellular carcinoma	2	2		2
SARS-CoV-2 infection	2	2		2
SSC-A on monocyte	2	2		2
Serine to glycine ratio	2	2		2
Serum levels of protein HP	2	2		2
Serum levels of protein IL18R1	2	2		2
Sphingomyelin_36:2_[M+H]1+ levels	2	2		2
Stool frequency	2	2		2
Suicide attempts in major depressive disorder or bipolar disorder or schizophrenia	2	2		2
TB-LM or TBLH-BMD (pleiotropy)	2	2		2
Thrombomodulin levels	2	2		2
Total lipid levels in medium HDL	2	2		2
Venous thromboembolism or factor XI levels (pleiotropy)	2	2		2
Venous thromboembolism or plasminogen activator inhibitor 1 levels (pleiotropy)	2	2		2
Venous thromboembolism or tissue plasminogen activator levels (pleiotropy)	2	2		2
Waist circumference variance	2	2		2
Waist-to-hip ratio adjusted for BMI in inactive individuals	2	2		2
White matter fractional anisotropy x age interaction (2df)	2	2		2
White matter hyperintensity burden	2	2		2
vWF levels	2	2		2
Baked/steamed fish liking	1	2		1
Ethylmalonate levels in elite athletes	1	2		1
F-healthy breakfast food liking (derived food-liking factor)	1	2		1
F-healthy food liking (derived food-liking factor)	1	2		1
Globe artichoke liking	1	2		1
IDP dMRI ProbtrackX ICVF ptr l	1	2		1
Loneliness	1	2		1
Regular attendance at a religious group	1	2		1
Serum levels of protein LILRB5	1	2		1
Shellfish liking	1	2		1
Acylcarnitine (12:0) levels		2
Diastolic blood pressure x alcohol consumption (light vs heavy) interaction (2df test)		2
Dodecenoylcarnitine levels		2
Mean arterial pressure x alcohol consumption (light vs heavy) interaction (2df test)		2
Octanoylcarnitine levels		2
Systolic blood pressure x alcohol consumption (light vs heavy) interaction (2df test)		2
Alzheimer's disease	1	1	39	1
Alzheimer's disease or family history of Alzheimer's disease		1	22
Total PHF-tau (SNP x SNP interaction)	1	1	17	1
Age at menopause	1	1	15	1
Urolithiasis	1	1	11	1
Age at first birth	1	1	9	1
Myopia	1	1	8	1
Nonalcoholic fatty liver disease (imputed)	1	1	8	1
Itch intensity from mosquito bite		1	8
Angina pectoris	1	1	7	1
LDL cholesterol levels x short total sleep time interaction (2df test)	1	1	6	1
Vertical cup-disc ratio (adjusted for vertical disc diameter)		1	6
Glaucoma	1	1	5	1
Myopia (age of diagnosis)	1	1	5	1
Neurofibrillary tangles (SNP x SNP interaction)	1	1	5	1
Serum phosphate levels	1	1	5	1
Sunburns	1	1	5	1
Triglycerides to total lipids ratio in small VLDL	1	1	5	1
Age-related hearing impairment	1	1	4	1
Cancer	1	1	4	1
Concentration of small HDL particles	1	1	4	1
Endometrial cancer	1	1	4	1
Epithelial ovarian cancer	1	1	4	1
Fruit consumption	1	1	4	1
Glutamine levels	1	1	4	1
High myopia	1	1	4	1
High-grade serous ovarian cancer	1	1	4	1
Lobe attachment (rater-scored or self-reported)	1	1	4	1
Occupational attainment	1	1	4	1
Osteoarthritis	1	1	4	1
Phospholipids to total lipids ratio in very large HDL	1	1	4	1
Positive affect	1	1	4	1
Retinal vascular fractal dimension	1	1	4	1
Tea consumption	1	1	4	1
Telomere length	1	1	4	1
Triglyceride levels x short total sleep time interaction (2df test)	1	1	4	1
Mean arterial pressure x alcohol consumption interaction (2df test)		1	4
Acylcarnitine (16:0) levels	1	1	3	1
Alzheimer's disease or HDL levels (pleiotropy)	1	1	3	1
Ascending aorta maximum area (MTAG)	1	1	3	1
Cholesterol to total lipids ratio in large LDL	1	1	3	1
Cholesteryl ester levels in small HDL	1	1	3	1
Cholesteryl esters to total lipids ratio in small LDL	1	1	3	1
Concentration of very small VLDL particles	1	1	3	1
Corneal astigmatism	1	1	3	1
DNA methylation-estimated granulocyte proportions	1	1	3	1
Gastroesophageal reflux disease, peptic ulcer disease and/or corresponding medications and treatment	1	1	3	1
Glomerular filtration rate	1	1	3	1
Hearing loss	1	1	3	1
Infant head circumference (MTAG)	1	1	3	1
Male puberty timing (late vs. average onset facial hair)	1	1	3	1
N-acetylarginine levels in elite athletes	1	1	3	1
Number of common colds	1	1	3	1
Peak expiratory flow	1	1	3	1
Phospholipid levels in small HDL	1	1	3	1
Regular attendance at a pub or social club	1	1	3	1
Retinal nerve fibre layer thickness or ganglion cell inner plexiform layer thickness (MTAG)	1	1	3	1
Serous invasive ovarian cancer	1	1	3	1
Serum protein levels (sST2)	1	1	3	1
Sphingomyelin levels	1	1	3	1
Spleen volume	1	1	3	1
Total amyloid (SNP x SNP interaction)	1	1	3	1
Triglycerides to total lipids ratio in medium LDL	1	1	3	1
Triglycerides to total lipids ratio in very large VLDL	1	1	3	1
Triglycerides to total lipids ratio in very small VLDL	1	1	3	1
Vertigo	1	1	3	1
Horseradish liking		1	3
Depressive symptoms (MTAG)	2	1	2	2
3-hydroxyisobutyrate levels in elite athletes	1	1	2	1
3-hydroxypropylmercapturic acid levels in smokers	1	1	2	1
Acylcarnitine (18:1) levels	1	1	2	1
Acylcarnitine (18:2) levels	1	1	2	1
Alanine levels	1	1	2	1
Aspartate aminotransferase platelet ratio index in high alcohol intake	1	1	2	1
Brain shape (segment 5)	1	1	2	1
Cholesterol to total lipids ratio in very large HDL	1	1	2	1
Cholesteryl ester_20:3_[M+NH4]1+ levels	1	1	2	1
Circulating docosahexaenoic acid levels	1	1	2	1
Cognitive impairment test score	1	1	2	1
Cryptic phenotype that captures alpha-1-antitrypsin deficiency severity	1	1	2	1
Descending aorta minimum area	1	1	2	1
Diastolic blood pressure x depressive symptoms interaction (2df test)	1	1	2	1
Extremely high intelligence	1	1	2	1
F-sharp flavour liking (derived food-liking factor)	1	1	2	1
Fibrosis-4 index in high alcohol intake	1	1	2	1
Forns index in high alcohol intake	1	1	2	1
Gout	1	1	2	1
Heel bone mineral density (MTAG)	1	1	2	1
Hippocampal volume	1	1	2	1
Ideal cardiovascular health score (clinical and behavioral)	1	1	2	1
Insomnia symptoms (never/rarely vs. sometimes/usually)	1	1	2	1
Insomnia symptoms (never/rarely vs. usually)	1	1	2	1
Iron status biomarkers (total iron binding capacity)	1	1	2	1
Iron status biomarkers (transferrin saturation)	1	1	2	1
Ischemic stroke	1	1	2	1
Lipid traits (pleiotropy) (HIPO component 2)	1	1	2	1
Lumbar spine bone mineral density (integral)	1	1	2	1
Mammographic density (dense area)	1	1	2	1
Migraine and/or diastolic blood pressure	1	1	2	1
Mitochondrial heteroplasmy measurement	1	1	2	1
Nonsyndromic orofacial cleft x sex interaction	1	1	2	1
Nonsyndromic orofacial cleft x sex interaction (2df)	1	1	2	1
Parental longevity (father's age at death)	1	1	2	1
Peptic ulcer disease	1	1	2	1
Phosphatidylcholine (18:0_22:5) (n6) levels	1	1	2	1
Physical activity	1	1	2	1
Resistin levels	1	1	2	1
Resting heart rate	1	1	2	1
Retinal nerve fibre layer (RNFL) thickness	1	1	2	1
Schizophrenia vs Tourette's syndrome and other tic disorders (ordinary least squares (OLS))	1	1	2	1
Secreted and transmembrane protein 1 levels	1	1	2	1
Total lipid levels in small HDL	1	1	2	1
Triglycerides to total lipids ratio in large LDL	1	1	2	1
Vitamin B12 levels	1	1	2	1
Waist circumference adjusted for BMI in smokers	1	1	2	1
White blood cell types	1	1	2	1
Blood pressure		1	2
Ratio of omega-3 fatty acids to total fatty acids		1	2
Depression (broad)	3	1	1	3
Iron status biomarkers (ferritin levels)	2	1	1	2
Neuroticism conditioned on highest math class (multi-trait conditioning and joint analysis)	2	1	1	2
Neuroticism conditioned on self-rated math ability (multi-trait conditioning and joint analysis)	2	1	1	2
Relative fat intake	2	1	1	2
1-methylnicotinamide levels in elite athletes	1	1	1	1
10-undecenoate (11:1n1) levels in elite athletes	1	1	1	1
3-hydroxy-1-methylpropylmercapturic acid levels in smokers	1	1	1	1
Aconitate [cis or trans] levels in elite athletes	1	1	1	1
Acylcarnitine (16:1) levels	1	1	1	1
Age at adiposity rebound	1	1	1	1
Alcohol dependence (age at onset)	1	1	1	1
Alcohol liking	1	1	1	1
Allergic sensitization	1	1	1	1
Anti-JC polyomavirus IgG seropositivity	1	1	1	1
Anti-polyomavirus 2 IgG seropositivity	1	1	1	1
Anti-saccharomyces cerevisiae IgA levels	1	1	1	1
Antibody level in response to infection	1	1	1	1
Antineutrophil cytoplasmic antibody-associated vasculitis	1	1	1	1
Aortic root size	1	1	1	1
Asthma (sex interaction)	1	1	1	1
Asthma control x inhaled corticosteroid treatment interaction (2df)	1	1	1	1
Atopic march	1	1	1	1
Atrial fibrillation/atrial flutter	1	1	1	1
Autism spectrum disorder, attention deficit-hyperactivity disorder, bipolar disorder, major depressive disorder, and schizophrenia (combined)	1	1	1	1
BMI at birth	1	1	1	1
Bipolar disorder and schizophrenia	1	1	1	1
Bisphosphonate-associated atypical femoral fracture	1	1	1	1
Bitter beverage consumption	1	1	1	1
Blood osmolality (transformed sodium)	1	1	1	1
Blood sugar levels	1	1	1	1
Body fat percentage and HDL-C (pairwise)	1	1	1	1
Body fat percentage or heart failure (MTAG)	1	1	1	1
Body mass index and triglycerides (pairwise)	1	1	1	1
Brain morphology (min-P)	1	1	1	1
Brain shape (segment 2)	1	1	1	1
Breakfast cereal skipping frequency	1	1	1	1
Breakfast skipping	1	1	1	1
Breast cancer (estrogen-receptor negative, progesterone-receptor negative, and human epidermal growth factor-receptor negative)	1	1	1	1
Broad bean liking	1	1	1	1
Broad depression or schizophrenia	1	1	1	1
CD80 on CD62L+ myeloid Dendritic Cell	1	1	1	1
CD80 on monocyte	1	1	1	1
CD80 on myeloid Dendritic Cell	1	1	1	1
C_Negativicutes prevalence	1	1	1	1
Cancer (pleiotropy)(bidirectional)	1	1	1	1
Cardiac hypertrophy	1	1	1	1
Carnitine levels	1	1	1	1
Celiac disease and Rheumatoid arthritis	1	1	1	1
Cerebrospinal fluid amyloid beta 42 levels (12 month visit)	1	1	1	1
Chenodeoxycholate levels in elite athletes	1	1	1	1
Childhood aggressive behavior	1	1	1	1
Cholesteryl ester_16:0_[M+NH4]1+ levels	1	1	1	1
Cholesteryl ester_18:3_[M+NH4]1+ levels	1	1	1	1
Cholesteryl esters to total lipids ratio in very large HDL	1	1	1	1
Chronic obstructive pulmonary disease x ever smoker interaction (2df)	1	1	1	1
Circulating fibroblast growth factor 23 levels	1	1	1	1
Citrate levels	1	1	1	1
Cleft lip with or without cleft palate or cleft palate (pleiotropy)	1	1	1	1
Colon cancer	1	1	1	1
Corpus callosum posterior volume	1	1	1	1
Cutaneous melanoma (MTAG)	1	1	1	1
Cystatin D levels	1	1	1	1
Dentate gyrus molecular layer volume	1	1	1	1
Disease progression in age-related macular degeneration (adjusted for baseline)	1	1	1	1
Driving (hours per day)	1	1	1	1
Dyslipidemia	1	1	1	1
Endometrial cancer (endometrioid histology)	1	1	1	1
Eotaxin levels	1	1	1	1
F-acquired taste liking (derived food-liking factor)	1	1	1	1
F-coffee/alcohol liking (derived food-liking factor)	1	1	1	1
FSC-A on monocyte	1	1	1	1
FSC-A on myeloid Dendritic Cell	1	1	1	1
Facial morphology (factor 21, depth of nasal alae)	1	1	1	1
Fasting blood glucose adjusted for BMI	1	1	1	1
Fasting blood insulin (BMI interaction)	1	1	1	1
Fear of severe pain	1	1	1	1
Free cholesterol levels in small HDL	1	1	1	1
Fresh fruit consumption	1	1	1	1
Gamma glutamyl transferase levels in low alcohol consumption	1	1	1	1
Gestational age at birth (child effect)	1	1	1	1
Gut microbiota (bacterial taxa)	1	1	1	1
Headache	1	1	1	1
Hematological parameters	1	1	1	1
Hippocampal subfield CA1 volume	1	1	1	1
Hippocampal subfield CA3 volume	1	1	1	1
Human milk oligosaccharide concentration (lacto-N-tetrose)	1	1	1	1
Human milk oligosaccharide concentration (sialyl-lacto-N-tetraose b)	1	1	1	1
Hypertrophic cardiomyopathy (sarcomere negative)	1	1	1	1
IDP T1 FAST ROIs R subcallosal cortex	1	1	1	1
Ideal cardiovascular health (clinical and behavioral)	1	1	1	1
Idiopathic inflammatory myopathy	1	1	1	1
Immunoglobulin A	1	1	1	1
Interleukin-6 levels	1	1	1	1
Intrinsic epigenetic age acceleration	1	1	1	1
Invasive epithelial ovarian cancer	1	1	1	1
Iris color (L* coordinate)	1	1	1	1
Iris color (b* coordinate)	1	1	1	1
Ischemic stroke (small artery occlusion)	1	1	1	1
Joint mobility (Beighton score)	1	1	1	1
Lactate levels	1	1	1	1
Left-handedness	1	1	1	1
Lipid traits	1	1	1	1
Lipoprotein (a) levels in coronary artery disease (percutaneous coronary intervention)	1	1	1	1
Low high density lipoprotein cholesterol levels	1	1	1	1
Lp (a) levels	1	1	1	1
Lysoalkylphosphatidylcholine (O-24:1) levels	1	1	1	1
Mental health study participation (provided email address)	1	1	1	1
Migraine and/or pulse pressure	1	1	1	1
Multiple myeloma (hyperdiploidy)	1	1	1	1
Myeloperoxidase levels	1	1	1	1
Neonatal abstinence syndrome	1	1	1	1
Never eat sugar vs no sugar restrictions (UKB data field 6144)	1	1	1	1
Nonsyndromic cleft lip with cleft palate	1	1	1	1
OTU97_27 (Bacteroides) prevalence	1	1	1	1
OTU99_1 (Bacteroides) prevalence	1	1	1	1
O_Selenomonadales prevalence	1	1	1	1
Obstructive sleep apnea trait (apnea hypopnea index, change over time)	1	1	1	1
Omega-3 fatty acid levels	1	1	1	1
Pantothenate levels	1	1	1	1
Parental longevity (combined parental attained age, Martingale residuals)	1	1	1	1
Phosphatidylcholine_36:2_[M+OAc]1-/Phosphatidylserine_40:1_[M-H]1- levels	1	1	1	1
Phosphatidylcholine_37:5_[M+H]1+/Phosphatidylethanolamine_40:5_[M+H]1+/Phosphatidate_42:6_[M+NH4]1+ levels	1	1	1	1
Phosphatidylcholine_40:6_[M+OAc]1-/Phosphatidylserine_44:5_[M-H]1- levels	1	1	1	1
Phosphatidylcholine_40:7_[M+H]1+ levels	1	1	1	1
Phosphatidylethanolamine-O_34:3_[M-H]1-/Phosphatidylethanolamine-P_34:2_[M-H]1- levels	1	1	1	1
Phosphatidylethanolamine_37:2_[M-H]1- levels	1	1	1	1
Phosphatidylethanolamine_38:2_[M-H]1- levels	1	1	1	1
Phosphatidylinositol_34:2_[M-H]1- levels	1	1	1	1
Phospholipids to total lipids ratio in large LDL	1	1	1	1
Phospholipids to total lipids ratio in small LDL	1	1	1	1
Phospholipids to total lipids ratio in very large VLDL	1	1	1	1
Pneumonia	1	1	1	1
Premature menopause in childhood cancer survivors	1	1	1	1
Principal component-derived dietary pattern 11	1	1	1	1
Prostate cancer (advanced)	1	1	1	1
Protein level change in low calorie diet obesity intervention	1	1	1	1
Protein levels in obesity	1	1	1	1
Pulmonary function	1	1	1	1
Rate of cognitive decline in Alzheimer's disease	1	1	1	1
Ratio of saturated fatty acids to total fatty acids	1	1	1	1
Raw carrot liking	1	1	1	1
Relative carbohydrate intake	1	1	1	1
Response to fenofibrate (adiponectin levels)	1	1	1	1
Rheumatoid arthritis (rheumatoid factor and anti-cyclic citrullinated peptide seronegative)	1	1	1	1
SSC-A on myeloid Dendritic Cell	1	1	1	1
Schizophrenia or bipolar disorder	1	1	1	1
Self-reported risk-taking behaviour	1	1	1	1
Serum levels of protein BTNL8	1	1	1	1
Serum levels of protein CRP	1	1	1	1
Serum levels of protein CST4	1	1	1	1
Serum levels of protein CST5	1	1	1	1
Serum levels of protein DLK1	1	1	1	1
Serum levels of protein FUT5	1	1	1	1
Serum levels of protein GOLM1	1	1	1	1
Serum levels of protein GPC3	1	1	1	1
Serum levels of protein PLG	1	1	1	1
Serum levels of protein SEMG2	1	1	1	1
Serum lipase activity	1	1	1	1
Small vessel stroke	1	1	1	1
Stroke (ischemic)	1	1	1	1
Subcortical volume (min-P)	1	1	1	1
Survival in rectal cancer	1	1	1	1
Systemic sclerosis (anti-centromere-positive)	1	1	1	1
TestASV_1 (Bacteroides) prevalence	1	1	1	1
Thrombomodulin levels in ischemic stroke	1	1	1	1
Total Sulfatide levels	1	1	1	1
Total body bone mineral density (MTAG)	1	1	1	1
Total omega-3 fatty acid levels	1	1	1	1
Trans fatty acid levels	1	1	1	1
Triacylglycerol_56:5_[M+NH4]1+ levels	1	1	1	1
Triacylglycerol_56:7_[M+NH4]1+ levels	1	1	1	1
Triacylglycerol_58:9_[M+NH4]1+ levels	1	1	1	1
Trigger finger	1	1	1	1
Tumor necrosis factor levels	1	1	1	1
Two-hour glucose	1	1	1	1
Type ii diabetes	1	1	1	1
Urinary albumin excretion	1	1	1	1
Very long-chain saturated fatty acid levels (fatty acid 20:0)	1	1	1	1
Waist-to-hip ratio adjusted for BMI (age <50)	1	1	1	1
Waist-to-hip ratio adjusted for BMI (age >50)	1	1	1	1
White blood cell count (monocyte)	1	1	1	1
acne vulgaris	1	1	1	1
aseg rh volume Pallidum	1	1	1	1
wg lh intensity-contrast fusiform	1	1	1	1
wg lh intensity-contrast inferiorparietal	1	1	1	1
wg lh intensity-contrast middletemporal	1	1	1	1
wg lh intensity-contrast supramarginal	1	1	1	1
wg rh intensity-contrast inferiorparietal	1	1	1	1
wg rh intensity-contrast middletemporal	1	1	1	1
wg rh intensity-contrast supramarginal	1	1	1	1
Arterial stiffness index		1	1
Capers liking		1	1
Corneal structure		1	1
Cysteinylglycine levels		1	1
Diastolic blood pressure (cigarette smoking interaction)		1	1
F-fish liking (derived food-liking factor)		1	1
F-glutamate liking (derived food-liking factor)		1	1
F-low caloric food liking (derived food-liking factor)		1	1
Glutarylcarnitine (c5-dc) levels		1	1
IDP SWI T2star left putamen		1	1
IDP SWI T2star right putamen		1	1
IDP dMRI ProbtrackX FA fmi		1	1
IDP dMRI ProbtrackX ICVF cgc r		1	1
IDP dMRI ProbtrackX ICVF fmi		1	1
IDP dMRI ProbtrackX ICVF ilf r		1	1
IDP dMRI ProbtrackX L3 fmi		1	1
IDP dMRI TBSS FA Genu of corpus callosum		1	1
IDP dMRI TBSS ICVF Body of corpus callosum		1	1
IDP dMRI TBSS ICVF Fornix cres+Stria terminalis R		1	1
IDP dMRI TBSS ICVF Genu of corpus callosum		1	1
IDP dMRI TBSS ICVF Splenium of corpus callosum		1	1
Intake of total sugars		1	1
Osteoporosis		1	1
Phenylalanylphenylalanine levels		1	1
Pulse pressure x alcohol consumption interaction (2df test)		1	1
Succinylcarnitine (c4-dc) levels		1	1
Systolic blood pressure (cigarette smoking interaction)		1	1
Triglyceride levels x loop diuretics use interaction		1	1
Fibrinogen levels or factor VII levels (pleiotropy)	2	1		2
Fibrinogen levels or factor VII levels or factor XI levels or tissue plasminogen activator levels (pleiotropy)	2	1		2
Neuroticism (MTAG)	2	1		2
Venous thromboembolism or factor VII levels (pleiotropy)	2	1		2
1-(1-enyl-stearoyl)-2-arachidonoyl-GPE (P-18:0/20:4) levels in elite athletes	1	1		1
1-methylnicotinamide levels	1	1		1
3-methoxytyrosine levels in elite athletes	1	1		1
5alpha-androstan-3beta,17beta-diol monosulfate (2) levels in elite athletes	1	1		1
ABO blood group (AB vs non-AB)	1	1		1
ABO blood group (B vs O)	1	1		1
ABO blood group (O vs non-O)	1	1		1
Acceptance of an invitation to wear a physical activity monitor	1	1		1
Acute anterior uveitis (with or without ankylosing spondylitis)	1	1		1
Acute graft versus host disease in bone marrow transplantation (recipient effect)	1	1		1
Acute insulin response	1	1		1
Acylcarnitine (17:0) (a) levels	1	1		1
Acylcarnitine (17:0) (b) levels	1	1		1
Adiponectin levels	1	1		1
Adiponectin levels in pregnancy	1	1		1
Adult onset asthma and/or BMI	1	1		1
Adverse response to chemotherapy (neutropenia/leucopenia) (paclitaxel)	1	1		1
Age-related macular degeneration (MTAG)	1	1		1
Alcohol consumption (drinkers vs non-drinkers)	1	1		1
Alcohol consumption in current drinkers	1	1		1
Alcohol dependence symptom count	1	1		1
Alcohol-associated liver disease in light drinkers	1	1		1
Alkaline phosphatase (UKB data field 30610)	1	1		1
Alzheimer disease and age of onset	1	1		1
Amygdala volume change rate x age interaction (1df)	1	1		1
Amyotrophic lateral sclerosis (age of onset)	1	1		1
Angiostatin levels	1	1		1
Anorexia nervosa or obsessive-compulsive disorder	1	1		1
Anti-saccade response	1	1		1
Anxiety and stress-related disorders	1	1		1
Arrhythmia	1	1		1
Asthma (time to event)	1	1		1
Asthma-COPD overlap syndrome	1	1		1
Attention deficit hyperactivity disorder (childhood)	1	1		1
Attention deficit hyperactivity disorder or autism spectrum disorder (pleiotropy)	1	1		1
Attention deficit hyperactivity disorder or caudate nucleus volume (pleiotropy)	1	1		1
Average oral glucocorticoid dose in mepolizumab-treated eosinophilic granulomatosis with polyangiitis	1	1		1
Avocado liking	1	1		1
BMI at 3 months old	1	1		1
BMI at 6 weeks old	1	1		1
Bipolar disorder lithium response (categorical) or schizophrenia	1	1		1
Bipolar disorder or body mass index	1	1		1
Birdshot chorioretinopathy	1	1		1
Birth weight variance	1	1		1
Bitter ale liking	1	1		1
Bitter non-alcoholic beverage consumption	1	1		1
Blood trace element (Se levels)	1	1		1
Body fat percentage and LDL-C (pairwise)	1	1		1
Body fat percentage and fasting insulin (pairwise)	1	1		1
Body fat percentage and triglycerides (pairwise)	1	1		1
Body fat percentage and type 2 diabetes (pairwise)	1	1		1
Body mass index (SNP x SNP interaction)	1	1		1
Body mass index (age <50)	1	1		1
Body mass index (age>50)	1	1		1
Body mass index and HDL-C (pairwise)	1	1		1
Body mass index and LDL-C (pairwise)	1	1		1
Body mass index and diastolic blood pressure (bivariate analysis)	1	1		1
Body mass index and fasting insulin (pairwise)	1	1		1
Body mass index in asthmatics	1	1		1
Body mass index x sex x age interaction (4df test)	1	1		1
Brain imaging in schizophrenia (dorsolateral prefrontal cortex interaction)	1	1		1
Brain rsFMRI measurement (amplitude of low frequency fluctations) (Net100_Node1)	1	1		1
Brain rsFMRI measurement (amplitude of low frequency fluctations) (Net100_Node10)	1	1		1
Brain rsFMRI measurement (amplitude of low frequency fluctations) (Net100_Node11)	1	1		1
Brain rsFMRI measurement (amplitude of low frequency fluctations) (Net100_Node12)	1	1		1
Brain rsFMRI measurement (amplitude of low frequency fluctations) (Net100_Node13)	1	1		1
Brain rsFMRI measurement (amplitude of low frequency fluctations) (Net100_Node15)	1	1		1
Brain rsFMRI measurement (amplitude of low frequency fluctations) (Net100_Node17)	1	1		1
Brain rsFMRI measurement (amplitude of low frequency fluctations) (Net100_Node18)	1	1		1
Brain rsFMRI measurement (amplitude of low frequency fluctations) (Net100_Node2)	1	1		1
Brain rsFMRI measurement (amplitude of low frequency fluctations) (Net100_Node22)	1	1		1
Brain rsFMRI measurement (amplitude of low frequency fluctations) (Net100_Node24)	1	1		1
Brain rsFMRI measurement (amplitude of low frequency fluctations) (Net100_Node25)	1	1		1
Brain rsFMRI measurement (amplitude of low frequency fluctations) (Net100_Node27)	1	1		1
Brain rsFMRI measurement (amplitude of low frequency fluctations) (Net100_Node29)	1	1		1
Brain rsFMRI measurement (amplitude of low frequency fluctations) (Net100_Node31)	1	1		1
Brain rsFMRI measurement (amplitude of low frequency fluctations) (Net100_Node37)	1	1		1
Brain rsFMRI measurement (amplitude of low frequency fluctations) (Net100_Node40)	1	1		1
Brain rsFMRI measurement (amplitude of low frequency fluctations) (Net100_Node42)	1	1		1
Brain rsFMRI measurement (amplitude of low frequency fluctations) (Net100_Node44)	1	1		1
Brain rsFMRI measurement (amplitude of low frequency fluctations) (Net100_Node46)	1	1		1
Brain rsFMRI measurement (amplitude of low frequency fluctations) (Net100_Node48)	1	1		1
Brain rsFMRI measurement (amplitude of low frequency fluctations) (Net100_Node49)	1	1		1
Brain rsFMRI measurement (amplitude of low frequency fluctations) (Net100_Node51)	1	1		1
Brain rsFMRI measurement (amplitude of low frequency fluctations) (Net100_Node55)	1	1		1
Brain rsFMRI measurement (amplitude of low frequency fluctations) (Net100_Node7)	1	1		1
Brain rsFMRI measurement (amplitude of low frequency fluctations) (Net25_Node1)	1	1		1
Brain rsFMRI measurement (amplitude of low frequency fluctations) (Net25_Node11)	1	1		1
Brain rsFMRI measurement (amplitude of low frequency fluctations) (Net25_Node13)	1	1		1
Brain rsFMRI measurement (amplitude of low frequency fluctations) (Net25_Node14)	1	1		1
Brain rsFMRI measurement (amplitude of low frequency fluctations) (Net25_Node16)	1	1		1
Brain rsFMRI measurement (amplitude of low frequency fluctations) (Net25_Node17)	1	1		1
Brain rsFMRI measurement (amplitude of low frequency fluctations) (Net25_Node18)	1	1		1
Brain rsFMRI measurement (amplitude of low frequency fluctations) (Net25_Node2)	1	1		1
Brain rsFMRI measurement (amplitude of low frequency fluctations) (Net25_Node20)	1	1		1
Brain rsFMRI measurement (amplitude of low frequency fluctations) (Net25_Node21)	1	1		1
Brain rsFMRI measurement (amplitude of low frequency fluctations) (Net25_Node3)	1	1		1
Brain rsFMRI measurement (amplitude of low frequency fluctations) (Net25_Node5)	1	1		1
Brain rsFMRI measurement (amplitude of low frequency fluctations) (Net25_Node7)	1	1		1
Brain rsFMRI measurement (amplitude of low frequency fluctations) (Net25_Node9)	1	1		1
Brain rsFMRI measurement (functional connectivity) (Net_Edge_ICA3)	1	1		1
Brain shape (segment 63)	1	1		1
Breast cancer specific mortality in breast cancer	1	1		1
Bronchial hyperresponsiveness in asthma	1	1		1
C-X-C motif chemokine 16 levels	1	1		1
C-reactive protein levels or triglyceride levels (pleiotropy)	1	1		1
CD14 on CD14+ CD16+ monocyte	1	1		1
CD19 on B cell	1	1		1
CD209 antigen levels	1	1		1
CD28- CD8dim T cell %T cell	1	1		1
CD28- CD8dim T cell Absolute Count	1	1		1
COVID-19 (covid pneumonia vs population)	1	1		1
COVID-19 (covid respiratory support vs population)	1	1		1
COVID-19 (critical illness vs mild symptoms)	1	1		1
COVID-19 (hospitalized covid vs population)	1	1		1
COVID-19 (severe respiratory symptoms vs population)	1	1		1
COVID-19 or obesity (pleiotropy)	1	1		1
Caffeine consumption from coffee	1	1		1
Caffeine consumption from tea	1	1		1
Cake icing liking	1	1		1
Calcific aortic valve stenosis	1	1		1
Carotene diol (1) levels	1	1		1
Carotene diol (2) levels	1	1		1
Carotid artery external diameter	1	1		1
Carotid artery internal diameter	1	1		1
Cerebral venous thrombosis	1	1		1
Cerebrospinal fluid clusterin levels in APOEe4- carriers	1	1		1
Cervical artery dissection	1	1		1
Childhood asthma	1	1		1
Cholesteryl ester_17:0_[M+NH4]1+ levels	1	1		1
Cholesteryl esters to total lipids ratio in small VLDL	1	1		1
Chronic central serous retinopathy	1	1		1
Chronic obstructive pulmonary disease in ever smokers	1	1		1
Chronic obstructive pulmonary disease in never smokers	1	1		1
Chronic obstructive pulmonary disease x ever smoker interaction (main effect)	1	1		1
Chronic pain	1	1		1
Circulating leptin levels or type 2 diabetes	1	1		1
Circulating myeloperoxidase levels (serum)	1	1		1
Cisplatin-induced ototoxicity	1	1		1
Clinical depression	1	1		1
Clinical laboratory measurements	1	1		1
Coagulation factor levels	1	1		1
Complement factor B levels	1	1		1
Conduct disorder (maternal expressed emotions interaction)	1	1		1
Congenital left-sided heart lesions	1	1		1
Coronary artery disease or ischemic stroke	1	1		1
Coronary artery disease or large artery stroke	1	1		1
Corpus callosum central volume	1	1		1
Creatine kinase levels in off-statin users	1	1		1
Crohn's disease x smoking status (never vs ever smoking) interaction	1	1		1
Cutaneous psoriasis	1	1		1
D-dimer levels	1	1		1
Daytime sleep phenotypes	1	1		1
Depressive and manic episodes in bipolar disorder	1	1		1
Dermatomyositis or juvenile dermatomyositis	1	1		1
Developmental language disorder (linguistic errors)	1	1		1
Differentiated thyroid cancer	1	1		1
Distal colorectal cancer	1	1		1
Drinking behavior	1	1		1
Duodenal ulcer	1	1		1
EGFR mutation-positive lung adenocarcinoma	1	1		1
Educational attainment (college completion)	1	1		1
Endometriosis or migraine	1	1		1
Epilepsy (remission after treatment)	1	1		1
Esophageal cancer	1	1		1
Esophageal squamous cell carcinoma	1	1		1
Eudaimonic well-being	1	1		1
Extranodal natural killer T-cell lymphoma (nasal type)	1	1		1
F-bitter food liking (derived food-liking factor)	1	1		1
F-deep fried food liking (derived food-liking factor)	1	1		1
F-salty food liking (derived food-liking factor)	1	1		1
F-strong alcohol liking (derived food-liking factor)	1	1		1
FAS plasma levels	1	1		1
Facial morphology (factor 20)	1	1		1
Facial skin colour (CIELAB index b* value)	1	1		1
Faecalicatena lactaris abundance in stool	1	1		1
Fasting insulin (adjusted for BMI) or polycystic ovary syndrome (pleiotropy)	1	1		1
Fasting insulin adjusted for BMI	1	1		1
Fatty acids (20:3)W6 levels	1	1		1
Fibrinogen	1	1		1
Fibrinogen levels or plasminogen activator inhibitor 1 levels (pleiotropy)	1	1		1
Fibrinogen levels or tissue plasminogen activator levels (pleiotropy)	1	1		1
Fibroblast growth factor 23 levels	1	1		1
Follistatin levels	1	1		1
Free cholesterol to total lipids ratio in chylomicrons and extremely large VLDL	1	1		1
GCA-900199385 sp900320755 abundance in stool	1	1		1
G_Ruminococcus prevalence	1	1		1
G_Sutterella prevalence	1	1		1
Gamma-glutamylphenylalanine levels in elite athletes	1	1		1
Gamma-glutamyltyrosine levels	1	1		1
Gamma-glutamyltyrosine levels in elite athletes	1	1		1
Gastric parietal cell autoantibody levels in type 1 diabetes	1	1		1
Glycerol 3-phosphate levels in elite athletes	1	1		1
Group IIA secretory phospholipase A2 levels in individuals with elevated hsCRP	1	1		1
Gut microbiota (beta diversity)	1	1		1
Gut microbiota abundance (k_Bacteria.p_Actinobacteria.c_Actinobacteria.o_Bifidobacteriales.f_Bifidobacteriaceae.g_Bifidobacterium.s_Bifidobacterium_bifidum)	1	1		1
Hallux valgus	1	1		1
Heart rate variability traits (SDNN)	1	1		1
Heart rate variability traits (pvRSA/HF)	1	1		1
Height adjusted BMI	1	1		1
Hepatitis B	1	1		1
Hernia abdominopelvic cavity	1	1		1
Hip circumference variance	1	1		1
Honey liking	1	1		1
Hyperopia	1	1		1
IDP T1 FAST ROIs L thalamus	1	1		1
IDP T1 FAST ROIs R thalamus	1	1		1
IDP dMRI ProbtrackX ICVF ar l	1	1		1
IDP dMRI TBSS ICVF Cerebral peduncle R	1	1		1
IDP dMRI TBSS ICVF Superior corona radiata R	1	1		1
IDP dMRI TBSS L1 External capsule R	1	1		1
IDP dMRI TBSS L2 Anterior limb of internal capsule R	1	1		1
Idiopathic central precocious puberty	1	1		1
IgD on IgD+ CD38+ B cell	1	1		1
IgD+ B cell Absolute Count	1	1		1
IgD+ CD24- B cell Absolute Count	1	1		1
Inflammatory biomarkers	1	1		1
Insulin disposition index	1	1		1
Insulin-related traits (multivariate analysis)	1	1		1
Iron status biomarkers (iron levels)	1	1		1
Ischemic stroke (small-vessel)	1	1		1
Ischemic stroke or factor VIII levels (pleiotropy)	1	1		1
Ischemic stroke or fibrinogen levels (pleiotropy)	1	1		1
Isobutyrylcarnitine (C4) levels in elite athletes	1	1		1
Kallikrein-6 levels	1	1		1
Kallikrein-7 levels	1	1		1
LDL cholesterol levels in HIV infection	1	1		1
Lactate dehydrogenase levels in off-statin users	1	1		1
Lateral ventricle volume	1	1		1
Left unilateral cleft lip	1	1		1
Leisure sedentary behaviour (computer use)	1	1		1
Leukocyte immunoglobulin-like receptor subfamily B member 2 levels	1	1		1
Lipoprotein phospholipase A2 activity in cardiovascular disease	1	1		1
Lipoprotein(a) levels adjusted for apolipoprotein(a) isoforms	1	1		1
Lung function (FVC) and body mass index	1	1		1
Lymphocytic leukemia	1	1		1
Lysine levels	1	1		1
Macrophage colony-stimulating factor 1 levels	1	1		1
Major depressive disorder (MTAG)	1	1		1
Male puberty timing (late vs. average onset voice breaking)	1	1		1
Mammographic density (non-dense area)	1	1		1
Mannose-binding protein C levels	1	1		1
Mastocytosis (KIT D816V positive)	1	1		1
Matrix metalloproteinase-12 levels	1	1		1
Matrix metalloproteinase-3 levels	1	1		1
Matrix metalloproteinase-7 levels	1	1		1
Matrix metalloproteinase-8 levels	1	1		1
Maximum habitual alcohol consumption	1	1		1
Maximum indexed left atrial volume	1	1		1
Medication use (antithrombotic agents)	1	1		1
Memory T-cell telomere length	1	1		1
Mental composite score	1	1		1
Metabolic syndrome (multivariate analysis)	1	1		1
Metabolite levels (Dihydroxy docosatrienoic acid)	1	1		1
Methotrexate pharmacokinetics (acute lymphoblastic leukemia)	1	1		1
Migraine and/or systolic blood pressure	1	1		1
Mood instability	1	1		1
Multiple myeloma (IgH translocation)	1	1		1
Myocardial infarction (early onset)	1	1		1
Myopia (pathological)	1	1		1
Myringotomy	1	1		1
N1-methyl-2-pyridone-5-carboxamide levels	1	1		1
NAD-dependent protein deacetylase sirtuin-2 levels	1	1		1
Naive CD8+ T cell %T cell	1	1		1
Naive-mature B cell Absolute Count	1	1		1
Natural Killer T %T cell	1	1		1
Natural Killer T %lymphocyte	1	1		1
Natural Killer T Absolute Count	1	1		1
Neovascular age-related macular degeneration	1	1		1
Nicotine dependence	1	1		1
Nodular sclerosis Hodgkin lymphoma	1	1		1
Non-oily fish consumption	1	1		1
Ornithine levels	1	1		1
Orofacial clefts	1	1		1
Osteoarthritis of the hip (hospital diagnosed)	1	1		1
Osteoarthrosis (time to event)	1	1		1
Otitis media	1	1		1
PDL-1 on CD14+ CD16- monocyte	1	1		1
Pallidum volume change rate	1	1		1
Parental lifespan	1	1		1
Peak insulin response	1	1		1
Peanut allergy	1	1		1
Percentage of invited food questionnaires completed	1	1		1
Phosphatidylcholine-O_42:6_[M+OAc]1-/Phosphatidylcholine-P_42:5_[M+OAc]1- levels	1	1		1
Phosphatidylcholine_38:2_[M+H]1+/Phosphatidylethanolamine_41:2_[M+H]1+ levels	1	1		1
Phosphatidylcholine_40:7_[M+OAc]1-/Phosphatidylserine_44:6_[M-H]1- levels	1	1		1
Phosphatidylethanolamine_37:3_[M-H]1- levels	1	1		1
Phosphatidylinositol_38:4_[M-H]1- levels	1	1		1
Phospholipids to total lipids ratio in chylomicrons and extremely large VLDL	1	1		1
Phytosterol levels	1	1		1
Placenta growth factor levels	1	1		1
Plasma alpha-amino-N-butyric acid levels in alcohol use disorder treated with acamprosate	1	1		1
Plasma thyroid-stimulating hormone levels	1	1		1
Plasma titanium levels	1	1		1
Platelet reactivity measurement (collagen-ADP)	1	1		1
Post-traumatic stress disorder (phenotype risk score)	1	1		1
Posterior thalamic nuclei volume	1	1		1
Postoperative atrial fibrillation after cardiac surgery	1	1		1
Postoperative venous thromboembolism	1	1		1
Principal component-derived dietary pattern 1	1	1		1
Principal component-derived dietary pattern 26	1	1		1
Principal component-derived dietary pattern 43	1	1		1
Protein biomarker	1	1		1
QRS complex (Cornell)	1	1		1
Quantitative traits	1	1		1
Renin levels	1	1		1
Response to hepatitis B vaccine	1	1		1
Response to paliperidone in schizophrenia (Multivariate)	1	1		1
Response to zileuton treatment in asthma (FEV1 change interaction)	1	1		1
Risky sexual behaviors (alcohol dependence interaction)	1	1		1
S-7-hydroxywarfarin levels	1	1		1
S-warfarin levels	1	1		1
SSC-A on CD14+ monocyte	1	1		1
Serum levels of protein C3	1	1		1
Serum levels of protein CAMP	1	1		1
Serum levels of protein CASC4	1	1		1
Serum levels of protein CEACAM7	1	1		1
Serum levels of protein CEL	1	1		1
Serum levels of protein CFB	1	1		1
Serum levels of protein CXCL16	1	1		1
Serum levels of protein EDIL3	1	1		1
Serum levels of protein EFEMP1	1	1		1
Serum levels of protein EGFLAM	1	1		1
Serum levels of protein F8	1	1		1
Serum levels of protein FGF7	1	1		1
Serum levels of protein GDI2	1	1		1
Serum levels of protein KLK7	1	1		1
Serum levels of protein LDHB	1	1		1
Serum levels of protein LILRA6	1	1		1
Serum levels of protein LRRC32	1	1		1
Serum levels of protein MBL2	1	1		1
Serum levels of protein MDH1	1	1		1
Serum levels of protein MRPL33	1	1		1
Serum levels of protein NCF2	1	1		1
Serum levels of protein NEO1	1	1		1
Serum levels of protein PNPLA2	1	1		1
Serum levels of protein PPY	1	1		1
Serum levels of protein REXO2	1	1		1
Serum levels of protein SEMA3G	1	1		1
Serum levels of protein SERPIND1	1	1		1
Serum levels of protein SERPINE2	1	1		1
Serum levels of protein SHANK3	1	1		1
Serum levels of protein TIMP3	1	1		1
Serum levels of protein TNFSF12	1	1		1
Serum levels of protein TXNRD1	1	1		1
Severe COVID-19 infection with respiratory failure (analysis I)	1	1		1
Severe COVID-19 infection with respiratory failure (analysis II)	1	1		1
Sexual dimorphism in anthropometric traits	1	1		1
Sib-shared facial trait 548; Facial segment 21; 3D morphology of the nose sides	1	1		1
Sleep duration (long sleep)	1	1		1
Small vessel stroke (MTAG)	1	1		1
Smoked fish liking	1	1		1
Soluble VCAM-1 levels	1	1		1
Sphingolipid levels	1	1		1
Sphingomyelin (34:3) levels	1	1		1
Sphingomyelin (d18:2/14:0) levels	1	1		1
Sphingomyelin_34:2_[M+H]1+ levels	1	1		1
Sphingomyelin_38:2_[M+H]1+ levels	1	1		1
Spinal canal stenosis	1	1		1
Spleen iron concentration	1	1		1
Spread type: Butter vs never use spread (UKB data field 1428)	1	1		1
Sub-foveal choroidal thickness	1	1		1
Subcortical brain region volumes	1	1		1
Suicide attempts in schizophrenia	1	1		1
Systolic blood pressure x low social support interaction (2df test)	1	1		1
T-Cell Immunoglobulin and Mucin domain 1 levels	1	1		1
T/B cell	1	1		1
Tea without sugar liking	1	1		1
Testosterone levels in postmenopausal women	1	1		1
Testosterone levels in premenopausal women	1	1		1
Thrombosis	1	1		1
Thyroid cancer (Papillary, radiation-related)	1	1		1
Thyroid function	1	1		1
Total body bone mineral density (age over 60)	1	1		1
Total carotid plaque area (excess vs minimal atherosclerosis)	1	1		1
Total sitosterol	1	1		1
Treatment response for severe sepsis	1	1		1
Triacylglycerol_56:8_[M+NH4]1+ levels	1	1		1
Triacylglycerol_58:7_[M+NH4]1+ levels	1	1		1
Type 1 diabetes (age at diagnosis)	1	1		1
Type 2 diabetes or polycystic ovary syndrome (pleiotropy)	1	1		1
UBA2821 abundance in stool	1	1		1
Vaginal microbiome MetaCyc pathway (FERMENTATION-PWY|mixed acid fermentation)	1	1		1
Vaginal microbiome relative abundance (c_Clostridia)	1	1		1
Valine levels	1	1		1
Venous thromboembolism or factor VIII levels (pleiotropy)	1	1		1
Venous thromboembolism or von Willebrand factor levels (pleiotropy)	1	1		1
Verbal memory performance (immediate recall level)	1	1		1
Vitamin E levels	1	1		1
Whiskey liking	1	1		1
White matter mean diffusivity x age interaction (2df)	1	1		1
X-25790 levels	1	1		1
aparc-DKTatlas rh area insula	1	1		1
aseg lh volume Putamen	1	1		1
aseg rh intensity Cerebellum-Cortex	1	1		1
body mass index x cabbage consumption interaction	1	1		1
rfMRI amplitudes (ICA100 node 11)	1	1		1
rfMRI amplitudes (ICA100 node 12)	1	1		1
rfMRI amplitudes (ICA100 node 44)	1	1		1
rfMRI amplitudes (ICA100 node 45)	1	1		1
vWF levels in ischaemic stroke and hyperhomocysteinaemia	1	1		1
von Willebrand factor levels	1	1		1
wg rh intensity-contrast parsopercularis	1	1		1
3-decenoylcarnitine levels		1
3-hydroxydecanoylcarnitine levels		1
Anticoagulant levels		1
Butternut squash liking		1
Cauliflower liking		1
Cis-4-decenoylcarnitine (C10:1) levels		1
Cocaine dependence		1
Composite immunoglobulin trait (IgA/IgG)		1
Cys-gly, oxidized levels		1
Decanoylcarnitine (C10) levels		1
Decenoylcarnitine levels		1
F-cooking flavour liking (derived food-liking factor)		1
F-cooking vegetables liking (derived food-liking factor)		1
F-oily fish liking (derived food-liking factor)		1
F-sauces liking (derived food-liking factor)		1
F-seafood liking (derived food-liking factor)		1
Gamma-glutamyltryptophan levels		1
HOMA-B (corrected for HOMA-IR)		1
Haddock liking		1
Hexanoylglycine levels in elite athletes		1
IDP dMRI ProbtrackX ICVF cgc l		1
IDP dMRI ProbtrackX ICVF cst l		1
IDP dMRI ProbtrackX ICVF cst r		1
IDP dMRI ProbtrackX ICVF fma		1
IDP dMRI ProbtrackX ICVF ilf l		1
IDP dMRI ProbtrackX ICVF ptr r		1
IDP dMRI ProbtrackX L2 fmi		1
IDP dMRI ProbtrackX MD fmi		1
IDP dMRI TBSS FA Posterior limb of internal capsule R		1
IDP dMRI TBSS FA Splenium of corpus callosum		1
IDP dMRI TBSS ICVF Anterior corona radiata R		1
IDP dMRI TBSS ICVF Cingulum cingulate gyrus L		1
IDP dMRI TBSS ICVF Cingulum cingulate gyrus R		1
IDP dMRI TBSS ICVF Fornix cres+Stria terminalis L		1
IDP dMRI TBSS ICVF Posterior limb of internal capsule L		1
IDP dMRI TBSS ICVF Posterior limb of internal capsule R		1
IDP dMRI TBSS ICVF Posterior thalamic radiation R		1
IDP dMRI TBSS ICVF Superior longitudinal fasciculus R		1
IDP dMRI TBSS L2 Genu of corpus callosum		1
IDP dMRI TBSS L2 Posterior limb of internal capsule L		1
IDP dMRI TBSS L2 Posterior limb of internal capsule R		1
IDP dMRI TBSS L2 Splenium of corpus callosum		1
IDP dMRI TBSS L3 Genu of corpus callosum		1
IDP dMRI TBSS L3 Posterior limb of internal capsule R		1
IDP dMRI TBSS L3 Splenium of corpus callosum		1
IDP dMRI TBSS MD Genu of corpus callosum		1
Lamb consumption		1
Laurylcarnitine (C12) levels		1
Leisure screen time (MTAG)		1
Loneliness (MTAG)		1
Lung Cancer (DNA repair capacity)		1
Midregional pro atrial natriuretic peptide levels		1
Moderate-to-vigorous intensity physical activity during leisure time (MTAG)		1
Moyamoya disease		1
Nonanoylcarnitine (C9) levels		1
Octanoylcarnitine (c8) levels		1
Pimelylcarnitine levels		1
Pollock liking		1
QRS complex (12-leadsum)		1
Red blood cell folate levels		1
Response to platinum-based chemotherapy (cisplatin)		1
Salad dressing liking		1
Sardines liking		1
Scoliosis		1
Serum levels of protein LILRA3		1
Serum levels of protein SHMT1		1
Temporomandibular joint disorder		1
Tetradecadienylcarnitine levels		1
Thalamus volume change rate x age interaction (1df)		1
Total protein levels x insomnia interaction		1
Turnip liking		1
White matter integrity (mean diffusivity)		1
Whole brain grey matter density		1
Verbal learning			83
Itch intensity from mosquito bite adjusted by bite size			26
Core binding factor acute myeloid leukemia			23
Vaginal microbiome MetaCyc pathway (PWY-5695|urate biosynthesis/inosine 5'-phosphate degradation)			21
Vaginal microbiome MetaCyc pathway (PWY-6608|guanosine nucleotides degradation III)			21
Vaginal microbiome MetaCyc pathway (PWY0-1298|superpathway of pyrimidine deoxyribonucleosides degradation)			21
Vaginal microbiome MetaCyc pathway (PWY-6609|adenine and adenosine salvage III)			20
Snoring			17
High IL-1beta levels in gingival crevicular fluid			16
Basal cell carcinoma			13
Ascending aorta minimum area			11
Fasting glucose			11
Glioma			10
Serum metabolite levels (CMS)			10
Family history of Alzheimer's disease			9
Macrophage inflammatory protein 1b levels			8
Ascending aorta maximum area			7
Ascending thoracic aortic diameter			7
Cerebral amyloid deposition (PET imaging)			7
Circulating odd-numbered chain saturated fatty acid levels (C15:0)			7
Keratinocyte cancer (MTAG)			7
Melanoma			7
Red vs. brown/black hair color			7
Age-related macular degeneration			6
Cortical thickness (MOSTest)			6
Femoral neck bone mineral density			6
Hepatocyte growth factor-like protein levels			6
IgG glycosylation			6
Morning vs. evening chronotype			6
Optic disc area			6
Stable angina pectoris			6
Testicular germ cell tumor			6
Extracellular matrix protein 1 levels			5
Fasting blood glucose			5
Glioblastoma			5
Life satisfaction			5
Urinary uromodulin levels (indexed to creatinine)			5
Vaginal microbiome relative abundance (s_Dialister micraerophilus)			5
Visceral adipose tissue adjusted for BMI			5
Alzheimer's disease (onset between ages 58 and 79)			4
Alzheimer's disease biomarkers			4
Attention deficit hyperactivity disorder (inattention symptoms)			4
Descending aorta maximum area			4
Descending aorta maximum area (MTAG)			4
Lifetime smoking			4
Non-glioblastoma glioma			4
Spontaneous coronary artery dissection			4
Tenofovir clearance in HIV infection			4
Triglyceride levels x long total sleep time interaction (2df test)			4
Type 1 diabetes autoantibodies in high risk HLA genotype individuals (time to event)			4
Vaginal microbiome MetaCyc pathway (FAO-PWY|fatty acid &beta;-oxidation I)	3		3	3
Vaginal microbiome MetaCyc pathway (P221-PWY|octane oxidation)	3		3	3
Vaginal microbiome MetaCyc pathway (PWY-5180|toluene degradation I (aerobic) (via o-cresol))	3		3	3
Vaginal microbiome MetaCyc pathway (PWY-5182|toluene degradation II (aerobic) (via 4-methylcatechol))	3		3	3
Vaginal microbiome MetaCyc pathway (PWY-5415|catechol degradation I (meta-cleavage pathway))	3		3	3
Vaginal microbiome MetaCyc pathway (PWY-6507|4-deoxy-L-threo-hex-4-enopyranuronate degradation)	3		3	3
Vaginal microbiome MetaCyc pathway (PWY-7094|fatty acid salvage)	3		3	3
Vaginal microbiome relative abundance (p_Proteobacteria)	3		3	3
Advanced age-related macular degeneration			3
Age-related disease endophenotypes			3
Age-related diseases, mortality and associated endophenotypes			3
Age-related hearing impairment (high frequency)			3
Agouti-related protein levels			3
Anthropometric traits			3
Anthropometric traits (multi-trait analysis)			3
Basophil percentage of granulocytes			3
Bone mineral density (femoral neck)			3
Brown vs. black hair color			3
Cerebrospinal fluid t-tau:AB1-42 ratio			3
Colorectal cancer or advanced adenoma			3
Copine-1 levels			3
Disc degeneration (lumbar)			3
Endostatin levels			3
Facial morphology			3
Fractures			3
Glioblastoma (age-stratified)			3
Hair morphology traits			3
Heart rate			3
Infant length			3
Late-onset Alzheimer's disease			3
Lifetime smoking (without educational attainment)			3
Low-grade serous and serous borderline ovarian cancer			3
Male puberty timing (early vs. average onset facial hair)			3
Membranous nephropathy			3
N-acylethanolamine-hydrolyzing acid amidase levels			3
Nasopharyngeal carcinoma			3
Neurofibrillary tangles			3
Nonsyndromic cleft palate			3
Orbital telorism			3
QRS interval (sulfonylurea treatment interaction)			3
Sitting height ratio			3
Skin cancer			3
Urinary uromodulin levels (raw)			3
Uterine fibroids (MTAG)			3
Verbal learning (visual presentation)			3
White blood cell count (eosinophil)			3
interferon-related traits			3
Triptolide cytotoxicity	1		2	1
2-aminooctanoate levels			2
Acne (severe)			2
Actinic keratosis			2
Age-related hearing impairment (MTAG)			2
Alcohol consumption x experiences in childhood (felt loved by family member) interaction			2
Ascending aorta diameter			2
Ascending aorta distensibility (MTAG)			2
Attention deficit hyperactivity disorder			2
Autism spectrum disorder			2
BK polyomavirus VP1 antibody levels			2
Behcet's disease			2
Bell's palsy			2
Biliary atresia			2
Birth length			2
Bone mineral density (paediatric, lower limb)			2
Bread consumption (slices per week) (UKB data field 1438)			2
Broad depression or bipolar disorder			2
Butyrylcarnitine levels			2
C-reactive protein and white blood cell count			2
C-reactive protein levels or total cholesterol levels (pleiotropy)			2
Caffeine metabolism (plasma 1,3,7-trimethylxanthine (caffeine) level)			2
Caffeine metabolism (plasma 1,7-dimethylxanthine (paraxanthine) to 1,3,7-trimethylxanthine (caffeine) ratio)			2
Cereal consumption (bowls per week) (UKB data field 1458)			2
Cerebrospinal fluid AB1-42 levels			2
Cerebrospinal fluid p-Tau181p:AB1-42 ratio			2
Change in neurofilament light levels			2
Chin dimples			2
Cholesterol			2
Cholesteryl ester(18:3)_[M+NH4]1+ levels			2
Cholesteryl ester(20:4)_[M+NH4]1+ levels			2
Cholesteryl ester(20:5)_[M+NH4]1+ levels			2
Cholesteryl esters to total lipids ratio in large VLDL			2
Cognitive decline rate in late mild cognitive impairment			2
Cognitive empathy			2
Cognitive traits (MTAG)			2
Coronary artery calcification			2
Cortical surface area (global PC1)			2
DNA methylation Hannum age acceleration			2
Daytime nap			2
Dementia and core Alzheimer's disease neuropathologic changes			2
Developmental dysplasia of the hip			2
Diabetic kidney disease			2
Digit length ratio (left hand)			2
Energy expenditure			2
Facial morphology (factor 12, vertical position of sublabial sulcus relative to central midface)			2
Facial morphology (segment 1)			2
Familial combined hyperlipidemia defined by Goldstein criteria			2
Familial combined hyperlipidemia defined by Mexico criteria			2
Fasting blood glucose (BMI interaction)			2
Femoral neck bone geometry and menarche (age at onset)			2
Femoral neck bone mineral density and trunk fat mass adjusted by trunk lean mass			2
Fibroblast growth factor basic levels			2
Free cholesterol to total lipids ratio in medium VLDL			2
Ganglion cell inner plexiform layer (GCIPL) thickness			2
Glioma (high-grade)			2
Glucose homeostasis traits			2
Granulins levels			2
Gynecologic disease			2
Heart rate response to recovery post exercise (10 sec)			2
Hip bone size			2
Histidine-rich glycoprotein levels			2
Idiopathic pulmonary fibrosis			2
Immunoglobulin superfamily containing leucine-rich repeat protein 2 levels			2
Interleukin-1 receptor-like 1 levels			2
Latent autoimmune diabetes vs. type 2 diabetes			2
Lectin-like oxidized LDL receptor 1 levels			2
Low hand grip strength (60 years and older) (EWGSOP)			2
Low molecular weight phosphotyrosine protein phosphatase levels			2
Lysophosphatidylcholine (22:5) [sn1] (n6) levels			2
Lysophosphatidylcholine(20:4)_[M+H]1+ levels			2
Medication use (immunosuppressants)			2
Medication use (opioids)			2
Methotrexate-related central neurotoxicity in children treated for acute lymphoblastic leukemia			2
Myasthenia gravis			2
N-acetyl-1-methylhistidine levels in elite athletes			2
N-acetylasparagine levels in elite athletes			2
N-acetylglutamine levels in elite athletes			2
N2-acetyllysine levels in elite athletes			2
Neck circumference (BMI adjusted)			2
Nevus count or cutaneous melanoma			2
Nonalcoholic fatty liver disease			2
Ocular disease			2
Oleoyl-oleoyl-glycerol (18:1/18:1) [1] levels in elite athletes			2
Osteoarthritis (with total hip replacement)			2
Osteoarthritis of the hip or knee (with total joint replacement)			2
Ovarian clear cell cancer			2
Paclitaxel disposition in epithelial ovarian cancer			2
Parental longevity (combined parental age at death)			2
Perceived unattractiveness to mosquitoes			2
Periodontal microbiota			2
Phosphatidate(39:1)_[M+H]1+ levels			2
Phosphatidate(43:4)_[M-H]1- levels			2
Phosphatidylcholine(32:0)_[M+H]1+/Phosphatidylethanolamine(35:0)_[M+H]1+/Phosphatidate(37:1)_[M+NH4]1+ levels			2
Phosphatidylcholine(33:2)_[M+H]1+/Phosphatidylethanolamine(36:2)_[M+H]1+/Phosphatidate(38:3)_[M+NH4]1+ levels			2
Phosphatidylcholine(33:3)_[M+H]1+/Phosphatidylethanolamine(36:3)_[M+H]1+/Phosphatidate(38:4)_[M+NH4]1+ levels			2
Phosphatidylcholine(34:2)_[M+H]1+/Phosphatidylethanolamine(37:2)_[M+H]1+/Phosphatidate(39:3)_[M+NH4]1+ levels			2
Phosphatidylcholine(35:4)_[M+H]1+/Phosphatidylethanolamine(38:4)_[M+H]1+/Phosphatidate(40:5)_[M+NH4]1+ levels			2
Phosphatidylcholine(36:2)_[M+H]1+/Phosphatidylethanolamine(39:2)_[M+H]1+/Phosphatidate(41:3)_[M+NH4]1+ levels			2
Phosphatidylcholine(36:3)_[M+H]1+/Phosphatidylethanolamine(39:3)_[M+H]1+/Phosphatidate(41:4)_[M+NH4]1+ levels			2
Phosphatidylcholine(36:3)_[M+OAc]1-/Phosphatidylserine(40:2)_[M-H]1- levels			2
Phosphatidylcholine(36:5)_[M+OAc]1-/Phosphatidylserine(40:4)_[M-H]1- levels			2
Phosphatidylcholine(37:4)_[M+H]1+/Phosphatidylethanolamine(40:4)_[M+H]1+/Phosphatidate(42:5)_[M+NH4]1+ levels			2
Phosphatidylcholine(38:4)_[M+H]1+/Phosphatidylethanolamine(41:4)_[M+H]1+ levels			2
Phosphatidylcholine(38:4)_[M+OAc]1-/Phosphatidylserine(42:3)_[M-H]1- levels			2
Phosphatidylcholine(38:5)_[M+H]1+/Phosphatidylethanolamine(41:5)_[M+H]1+/Phosphatidate(43:6)_[M+NH4]1+ levels			2
Phosphatidylcholine(40:4)_[M+OAc]1-/Phosphatidylserine(44:3)_[M-H]1- levels			2
Phosphatidylcholine(40:5)_[M+H]1+ levels			2
Phosphatidylcholine(40:5)_[M+OAc]1-/Phosphatidylserine(44:4)_[M-H]1- levels			2
Phosphatidylcholine(42:4)_[M+OAc]1- levels			2
Phosphatidylcholine-O(36:3)_M+H]1+/Phosphatidylcholine-P(36:2)_M+H]1+ levels			2
Phosphatidylcholine-O(36:5)_[M+H]1+/Phosphatidylcholine-P(36:4)_[M+H]1+ levels			2
Phosphatidylcholine-O(38:5)_[M+H]1+/Phosphatidylcholine-P(38:4)_[M+H]1+ levels			2
Phosphatidylcholine-O(40:5)_[M+H]1+/Phosphatidylcholine-P(40:4)_[M+H]1+ levels			2
Phosphatidylethanolamine(34:2)_[M+H]1+ levels			2
Phosphatidylethanolamine(38:5)_[M-H]1- levels			2
Phosphatidylethanolamine-O(38:4)_[M-H]1-/Phosphatidylcholine-O(35:4)_[M-H]1-/Phosphatidylcholine-P(35:3)_[M-H]1- levels			2
Phosphatidylethanolamine-O(38:6)_[M+H]1+/Phosphatidylcholine-P(35:5)_[M+H]1+ levels			2
Phosphatidylglycerol (36:2) levels			2
Phosphatidylglycerol(34:0)_[M-H]1- levels			2
Phosphatidylglycerol(36:0)_[M-H]1- levels			2
Phosphatidylinositol(36:1)_[M+OAc]1- levels			2
Phosphatidylinositol(36:2)_[M-H]1- levels			2
Phosphatidylinositol(38:4)_[M-H]1- levels			2
Phosphatidylinositol-O(36:0)_[M-H]1-/Phosphatidylglycerol(37:0)_[M+OAc]1- levels			2
Phosphatidylserine(44:6)_[M+OAc]1- levels			2
Phosphorus levels			2
Plasma kallikrein levels			2
Plasma omega-3 polyunsaturated fatty acid level (eicosapentaenoic acid)			2
Plasma omega-6 polyunsaturated fatty acid levels (linoleic acid)			2
Processed meat consumption			2
Protein FAM3D levels			2
QTc interval			2
Refractive astigmatism			2
Resistant hypertension			2
Response to bronchodilator in chronic obstructive pulmonary disease (change in FEV1)			2
Response to fluoro-deoxyuridine			2
Response to paliperidone in schizophrenia (positive Marder score)			2
Response to serotonin-norepinephrine reuptake inhibitors (responders vs non-responders)			2
Serous borderline ovarian cancer			2
Serum levels of protein DPEP1			2
Serum levels of protein FGF19			2
Serum levels of protein FN1			2
Serum levels of protein KNG1			2
Serum levels of protein OLR1			2
Severe autoimmune type 2 diabetes			2
Spherical equivalent (joint analysis main effects and education interaction)			2
Sphingomyelin(44:9)_[M+H]1- levels			2
Sphingomyelin_36:1_[M+H]1+ levels			2
Sphingomyelin_38:1_[M+H]1+ levels			2
Sphingomyelin_42:2_[M+H]1+ levels			2
Sphingomyelin_42:2_[M+OAc]1- levels			2
Spine bone size			2
Squamous cell carcinoma			2
Stromal-cell-derived factor 1 alpha levels			2
Thioredoxin domain-containing protein 12 levels			2
Total cerebellar volume (excluding Crus I vermis)			2
[truncated: 716 more rows]

## Sheet: ST3
Supplementary Table 3. 839 Inflammation biomarkers and UniProt ID.
Number	p2	UniProt	p_Assay
1	uniprot.A2VDF0_ukb.OID30626_decode.NA	A2VDF0	FUOM
2	uniprot.A6NC86_ukb.OID30651_decode.NA	A6NC86	PINLYP
3	uniprot.B1AKI9_ukb.OID20538_decode.8355_80	B1AKI9	ISM1
4	uniprot.O00148_ukb.OID30494_decode.NA	O00148	DDX39A
5	uniprot.O00175_ukb.OID20772_decode.4128_27	O00175	CCL24
6	uniprot.O00182_ukb.OID20781_decode.9197_4	O00182	LGALS9
7	uniprot.O00206_ukb.OID30428_decode.11101_18	O00206	TLR4
8	uniprot.O00220_ukb.OID20967_decode.4832_75	O00220	TNFRSF10A
9	uniprot.O00241_ukb.OID20739_decode.6247_9	O00241	SIRPB1
10	uniprot.O00253_ukb.OID20658_decode.2813_11	O00253	AGRP
11	uniprot.O00273_ukb.OID20620_decode.NA	O00273	DFFA
12	uniprot.O00300_ukb.OID20735_decode.8304_50	O00300	TNFRSF11B
13	uniprot.O00339_ukb.OID20767_decode.3325_2	O00339	MATN2
14	uniprot.O00391_ukb.OID30729_decode.NA	O00391	QSOX1
15	uniprot.O00401_ukb.OID30467_decode.NA	O00401	WASL
16	uniprot.O00468_ukb.OID20786_decode.15483_377	O00468	AGRN
17	uniprot.O00585_ukb.OID20686_decode.2516_57	O00585	CCL21
18	uniprot.O00602_ukb.OID30690_decode.15582_25	O00602	FCN1
19	uniprot.O00626_ukb.OID20765_decode.3508_78	O00626	CCL22
20	uniprot.O14625_ukb.OID21042_decode.3038_9	O14625	CXCL11
21	uniprot.O14745_ukb.OID30630_decode.NA	O14745	SLC9A3R1
22	uniprot.O14763_ukb.OID20981_decode.5534_49	O14763	TNFRSF10B
23	uniprot.O14763_ukb.OID20981_decode.8529_1	O14763	TNFRSF10B
24	uniprot.O14773_ukb.OID20750_decode.17691_1	O14773	TPP1
25	uniprot.O14788_ukb.OID20592_decode.14061_48	O14788	TNFSF11
26	uniprot.O14791_ukb.OID30708_decode.11510_31	O14791	APOL1
27	uniprot.O14791_ukb.OID30708_decode.9506_10	O14791	APOL1
28	uniprot.O14836_ukb.OID20702_decode.2704_74	O14836	TNFRSF13B
29	uniprot.O14867_ukb.OID20505_decode.12451_62	O14867	BACH1
30	uniprot.O14904_ukb.OID20460_decode.NA	O14904	WNT9A
31	uniprot.O15169_ukb.OID20582_decode.NA	O15169	AXIN1
32	uniprot.O15335_ukb.OID30660_decode.13460_4	O15335	CHAD
33	uniprot.O15400_ukb.OID30560_decode.8274_64	O15400	STX7
34	uniprot.O15444_ukb.OID20674_decode.2705_5	O15444	CCL25
35	uniprot.O15444_ukb.NA_decode.2705_5	O15444	CCL25
36	uniprot.O15455_ukb.OID20612_decode.16918_198	O15455	TLR3
37	uniprot.O43184_ukb.OID30491_decode.4420_7	O43184	ADAM12
38	uniprot.O43291_ukb.OID20720_decode.2843_13	O43291	SPINT2
39	uniprot.O43320_ukb.OID30535_decode.4393_3	O43320	FGF16
40	uniprot.O43399_ukb.OID30609_decode.NA	O43399	TPD52L2
41	uniprot.O43493_ukb.OID30691_decode.NA	O43493	TGOLN2
42	uniprot.O43508_ukb.OID20624_decode.5939_42	O43508	TNFSF12
43	uniprot.O43521-2_ukb.OID20513_decode.NA	O43521-2	BCL2L11
44	uniprot.O43557_ukb.NA_decode.5988_49	O43557	TNFSF14
45	uniprot.O43557_ukb.NA_decode.5355_69	O43557	TNFSF14
46	uniprot.O43561_ukb.OID20640_decode.10551_7	O43561	LAT
47	uniprot.O43583_ukb.OID30493_decode.19287_59	O43583	DENR
48	uniprot.O43597_ukb.OID20475_decode.NA	O43597	SPRY2
49	uniprot.O43598_ukb.OID20744_decode.17785_11	O43598	DNPH1
50	uniprot.O43639_ukb.OID20683_decode.13615_60	O43639	NCK2
51	uniprot.O43707_ukb.OID20435_decode.NA	O43707	ACTN4
52	uniprot.O43736_ukb.OID20504_decode.7765_15	O43736	ITM2A
53	uniprot.O43866_ukb.OID30775_decode.3293_2	O43866	CD5L
54	uniprot.O43915_ukb.OID20662_decode.14705_1	O43915	VEGFD
55	uniprot.O43915_ukb.OID20662_decode.13098_93	O43915	VEGFD
56	uniprot.O60238_ukb.OID30525_decode.7835_2	O60238	BNIP3L
57	uniprot.O60279_ukb.OID30650_decode.NA	O60279	SUSD5
58	uniprot.O60437_ukb.OID30564_decode.NA	O60437	PPL
59	uniprot.O60447_ukb.OID30519_decode.NA	O60447	EVI5
60	uniprot.O60449_ukb.OID20580_decode.16620_26	O60449	LY75
61	uniprot.O60500_ukb.OID30540_decode.NA	O60500	NPHS1
62	uniprot.O60542_ukb.OID20511_decode.2696_87	O60542	PSPN
63	uniprot.O60575_ukb.OID20509_decode.19213_1	O60575	SPINK4
64	uniprot.O60880_ukb.OID20514_decode.4567_82	O60880	SH2D1A
65	uniprot.O60884_ukb.OID20627_decode.11582_63	O60884	DNAJA2
66	uniprot.O60934_ukb.OID20442_decode.NA	O60934	NBN
67	uniprot.O75077_ukb.OID20651_decode.7049_2	O75077	ADAM23
68	uniprot.O75173_ukb.OID30471_decode.2809_25	O75173	ADAMTS4
69	uniprot.O75190_ukb.OID30613_decode.11606_22	O75190	DNAJB6
70	uniprot.O75347_ukb.OID30616_decode.12501_10	O75347	TBCA
71	uniprot.O75365_ukb.OID30469_decode.19231_22	O75365	PTP4A3
72	uniprot.O75462_ukb.OID20699_decode.14747_9	O75462	CRLF1
73	uniprot.O75475_ukb.OID20534_decode.17176_13	O75475	PSIP1
74	uniprot.O75563_ukb.OID20761_decode.NA	O75563	SKAP2
75	uniprot.O75688_ukb.OID30548_decode.NA	O75688	PPM1B
76	uniprot.O75882-2_ukb.OID30735_decode.NA	O75882-2	ATRN
77	uniprot.O75888_ukb.OID20733_decode.NA	O75888	TNFSF13
78	uniprot.O76036_ukb.OID20566_decode.8360_169	O76036	NCR1
79	uniprot.O76038_ukb.OID20457_decode.15305_7	O76038	SCGN
80	uniprot.O76074_ukb.OID30584_decode.16805_5	O76074	PDE5A
81	uniprot.O76074_ukb.OID30584_decode.5256_86	O76074	PDE5A
82	uniprot.O76096_ukb.OID20704_decode.3302_58	O76096	CST7
83	uniprot.O94856_ukb.OID20634_decode.7179_69	O94856	NFASC
84	uniprot.O94916_ukb.OID30522_decode.NA	O94916	NFAT5
85	uniprot.O94992_ukb.OID20589_decode.15596_7	O94992	HEXIM1
86	uniprot.O95157_ukb.OID30565_decode.6054_6	O95157	NXPH3
87	uniprot.O95379_ukb.OID20433_decode.12563_2	O95379	TNFAIP8
88	uniprot.O95393_ukb.OID30575_decode.3587_53	O95393	BMP10
89	uniprot.O95429_ukb.OID30474_decode.12844_10	O95429	BAG4
90	uniprot.O95497_ukb.OID30711_decode.NA	O95497	VNN1
91	uniprot.O95633_ukb.OID20782_decode.3438_10	O95633	FSTL3
92	uniprot.O95644_ukb.OID20545_decode.14286_2	O95644	NFATC1
93	uniprot.O95715_ukb.OID20458_decode.5730_60	O95715	CXCL14
94	uniprot.O95750_ukb.OID20715_decode.13724_27	O95750	FGF19
95	uniprot.O95760_ukb.OID20428_decode.NA	O95760	IL33
96	uniprot.O95835_ukb.OID30523_decode.NA	O95835	LATS1
97	uniprot.O95866_ukb.OID20779_decode.8659_68	O95866	MPIG6B
98	uniprot.O95866_ukb.OID20779_decode.7065_1	O95866	MPIG6B
99	uniprot.O95971_ukb.OID20647_decode.17677_47	O95971	CD160
100	uniprot.O95998_ukb.OID20348_decode.3073_51	O95998	IL18BP
101	uniprot.O96007_ukb.OID30638_decode.NA	O96007	MOCS2
102	uniprot.P00325_ukb.OID30612_decode.9834_62	P00325	ADH1B
103	uniprot.P00390_ukb.OID30700_decode.19273_3	P00390	GSR
104	uniprot.P00734_ukb.OID30723_decode.4157_2	P00734	F2
105	uniprot.P00734_ukb.OID30723_decode.5316_54	P00734	F2
106	uniprot.P00736_ukb.OID30753_decode.3285_23	P00736	C1R
107	uniprot.P00742_ukb.OID30684_decode.3077_66	P00742	F10
108	uniprot.P00742_ukb.OID30684_decode.4878_3	P00742	F10
109	uniprot.P00746_ukb.OID30738_decode.2946_52	P00746	CFD
110	uniprot.P00747_ukb.OID30785_decode.4151_6	P00747	PLG
111	uniprot.P00747_ukb.OID30785_decode.4150_75	P00747	PLG
112	uniprot.P00747_ukb.OID30785_decode.3710_49	P00747	PLG
113	uniprot.P00748_ukb.OID30739_decode.NA	P00748	F12
114	uniprot.P00749_ukb.NA_decode.4158_54	P00749	PLAU
115	uniprot.P00751_ukb.OID30755_decode.4129_72	P00751	CFB
116	uniprot.P00813_ukb.OID20645_decode.NA	P00813	ADA
117	uniprot.P01008_ukb.OID30789_decode.3344_60	P01008	SERPINC1
118	uniprot.P01009_ukb.OID30750_decode.3580_25	P01009	SERPINA1
119	uniprot.P01011_ukb.OID30786_decode.4153_11	P01011	SERPINA3
120	uniprot.P01011_ukb.OID30786_decode.2879_9	P01011	SERPINA3
121	uniprot.P01019_ukb.OID30709_decode.3484_60	P01019	AGT
122	uniprot.P01024_ukb.OID30776_decode.5803_24	P01024	C3
123	uniprot.P01024_ukb.OID30776_decode.2754_50	P01024	C3
124	uniprot.P01024_ukb.OID30776_decode.2683_1	P01024	C3
125	uniprot.P01024_ukb.OID30776_decode.4480_59	P01024	C3
126	uniprot.P01024_ukb.OID30776_decode.4900_8	P01024	C3
127	uniprot.P01031_ukb.OID30744_decode.2851_63	P01031	C5
128	uniprot.P01031_ukb.OID30744_decode.2381_52	P01031	C5
129	uniprot.P01037_ukb.OID30581_decode.5459_33	P01037	CST1
130	uniprot.P01127_ukb.OID20741_decode.4149_8	P01127	PDGFB
131	uniprot.P01133_ukb.OID20698_decode.5509_7	P01133	EGF
132	uniprot.P01135_ukb.OID20600_decode.NA	P01135	TGFA
133	uniprot.P01137_ukb.OID20621_decode.2333_72	P01137	TGFB1
134	uniprot.P01138_ukb.OID20920_decode.5801_72	P01138	NGF
135	uniprot.P01210_ukb.OID30666_decode.9076_25	P01210	PENK
136	uniprot.P01374_ukb.OID20586_decode.4703_87	P01374	LTA
137	uniprot.P01375_ukb.OID20473_decode.5936_53	P01375	TNF
138	uniprot.P01375_ukb.OID20074_decode.5936_53	P01375	TNF
139	uniprot.P01375_ukb.OID20848_decode.5936_53	P01375	TNF
140	uniprot.P01375_ukb.OID21237_decode.5936_53	P01375	TNF
141	uniprot.P01579_ukb.OID20495_decode.15346_31	P01579	IFNG
142	uniprot.P01583_ukb.OID20488_decode.4851_25	P01583	IL1A
143	uniprot.P01584_ukb.OID20427_decode.3037_62	P01584	IL1B
144	uniprot.P01588_ukb.OID20522_decode.5813_58	P01588	EPO
145	uniprot.P01591_ukb.OID20494_decode.15306_20	P01591	JCHAIN
146	uniprot.P01730_ukb.OID20584_decode.3143_3	P01730	CD4
147	uniprot.P01903_ukb.OID20520_decode.NA	P01903	HLA-DRA
148	uniprot.P02647_ukb.OID30769_decode.2750_3	P02647	APOA1
149	uniprot.P02649_ukb.OID30727_decode.2418_55	P02649	APOE
150	uniprot.P02652_ukb.OID30686_decode.7127_3	P02652	APOA2
151	uniprot.P02654_ukb.OID30749_decode.15364_101	P02654	APOC1
152	uniprot.P02671_ukb.OID30788_decode.NA	P02671	FGA
153	uniprot.P02743_ukb.OID30778_decode.2474_54	P02743	APCS
154	uniprot.P02745_ukb.OID20654_decode.NA	P02745	C1QA
155	uniprot.P02748_ukb.OID30698_decode.3060_43	P02748	C9
156	uniprot.P02750_ukb.OID30751_decode.NA	P02750	LRG1
157	uniprot.P02751_ukb.OID30787_decode.4131_72	P02751	FN1
158	uniprot.P02751_ukb.OID30787_decode.3434_34	P02751	FN1
159	uniprot.P02751_ukb.OID30787_decode.3435_53	P02751	FN1
160	uniprot.P02763_ukb.OID30768_decode.NA	P02763	ORM1
161	uniprot.P02765_ukb.OID30706_decode.3581_53	P02765	AHSG
162	uniprot.P02766_ukb.OID30782_decode.NA	P02766	TTR
163	uniprot.P02774_ukb.OID30780_decode.15589_1	P02774	GC
164	uniprot.P02775_ukb.OID30761_decode.16765_52	P02775	PPBP
165	uniprot.P02775_ukb.OID30761_decode.2790_54	P02775	PPBP
166	uniprot.P02775_ukb.OID30761_decode.17165_1	P02775	PPBP
167	uniprot.P02775_ukb.OID30761_decode.4544_4	P02775	PPBP
168	uniprot.P02776_ukb.OID30764_decode.2697_7	P02776	PF4
169	uniprot.P02778_ukb.OID20697_decode.4141_79	P02778	CXCL10
170	uniprot.P02787_ukb.OID30783_decode.4162_54	P02787	TF
171	uniprot.P03372_ukb.OID30434_decode.NA	P03372	ESR1
172	uniprot.P03951_ukb.OID30773_decode.2190_55	P03951	F11
173	uniprot.P03952_ukb.OID30760_decode.4152_58	P03952	KLKB1
174	uniprot.P03956_ukb.OID20672_decode.4924_32	P03956	MMP1
175	uniprot.P04040_ukb.OID30712_decode.3488_64	P04040	CAT
176	uniprot.P04083_ukb.OID30617_decode.4960_72	P04083	ANXA1
177	uniprot.P04085_ukb.OID20313_decode.4499_21	P04085	PDGFA
178	uniprot.P04090_ukb.OID30601_decode.6621_10	P04090	RLN2
179	uniprot.P04114_ukb.OID30673_decode.2797_56	P04114	APOB
180	uniprot.P04180_ukb.OID30677_decode.15413_3	P04180	LCAT
181	uniprot.P04196_ukb.OID30770_decode.4996_66	P04196	HRG
182	uniprot.P04217_ukb.OID30771_decode.16561_9	P04217	A1BG
183	uniprot.P04278_ukb.OID30685_decode.4929_55	P04278	SHBG
184	uniprot.P04406_ukb.OID30600_decode.3848_14	P04406	GAPDH
185	uniprot.P05090_ukb.OID30746_decode.4712_28	P05090	APOD
186	uniprot.P05112_ukb.OID20426_decode.2906_55	P05112	IL4
187	uniprot.P05113_ukb.OID20472_decode.11071_1	P05113	IL5
188	uniprot.P05154_ukb.OID30763_decode.3389_7	P05154	SERPINA5
189	uniprot.P05155_ukb.OID30777_decode.4479_14	P05155	SERPING1
190	uniprot.P05156_ukb.OID30772_decode.2567_5	P05156	CFI
191	uniprot.P05160_ukb.OID30781_decode.5658_64	P05160	F13B
192	uniprot.P05231_ukb.OID20563_decode.4673_13	P05231	IL6
193	uniprot.P05231_ukb.OID21276_decode.4673_13	P05231	IL6
194	uniprot.P05231_ukb.OID20911_decode.4673_13	P05231	IL6
195	uniprot.P05231_ukb.OID20101_decode.4673_13	P05231	IL6
196	uniprot.P05362_ukb.OID20411_decode.4342_10	P05362	ICAM1
197	uniprot.P05412_ukb.OID20424_decode.10356_21	P05412	JUN
198	uniprot.P05452_ukb.OID30756_decode.5701_81	P05452	CLEC3B
199	uniprot.P05543_ukb.OID30724_decode.2706_69	P05543	SERPINA7
200	uniprot.P05546_ukb.OID30767_decode.3316_58	P05546	SERPIND1
201	uniprot.P06127_ukb.OID21449_decode.14065_11	P06127	CD5
202	uniprot.P06127_ukb.OID21449_decode.5596_75	P06127	CD5
203	uniprot.P06132_ukb.OID30603_decode.19289_29	P06132	UROD
204	uniprot.P06213_ukb.OID30566_decode.3448_13	P06213	INSR
205	uniprot.P06276_ukb.OID30717_decode.15514_26	P06276	BCHE
206	uniprot.P06280_ukb.OID30594_decode.15588_17	P06280	GLA
207	uniprot.P06396_ukb.OID30714_decode.4775_34	P06396	GSN
208	uniprot.P06396_ukb.OID30714_decode.16607_78	P06396	GSN
209	uniprot.P06401_ukb.OID30460_decode.15693_9	P06401	PGR
210	uniprot.P06727_ukb.OID30733_decode.17685_9	P06727	APOA4
211	uniprot.P06730_ukb.OID30557_decode.19263_147	P06730	EIF4E
212	uniprot.P06744_ukb.OID30680_decode.4272_46	P06744	GPI
213	uniprot.P07148_ukb.OID20778_decode.11516_7	P07148	FABP1
214	uniprot.P07225_ukb.OID30737_decode.2700_56	P07225	PROS1
215	uniprot.P07307_ukb.OID30679_decode.9474_22	P07307	ASGR2
216	uniprot.P07311_ukb.OID30642_decode.NA	P07311	ACYP1
217	uniprot.P07333_ukb.OID30681_decode.13682_47	P07333	CSF1R
218	uniprot.P07358_ukb.OID30719_decode.NA	P07358	C8B
219	uniprot.P07998_ukb.OID30672_decode.7211_2	P07998	RNASE1
220	uniprot.P08185_ukb.OID30743_decode.4785_30	P08185	SERPINA6
221	uniprot.P08294_ukb.OID30683_decode.5660_51	P08294	SOD3
222	uniprot.P08519_ukb.OID30747_decode.NA	P08519	LPA
223	uniprot.P08603_ukb.OID30790_decode.4159_130	P08603	CFH
224	uniprot.P08697_ukb.OID30779_decode.3024_18	P08697	SERPINF2
225	uniprot.P08727_ukb.OID20596_decode.15606_19	P08727	KRT19
226	uniprot.P09038_ukb.OID20503_decode.3025_50	P09038	FGF2
227	uniprot.P09172_ukb.OID30703_decode.NA	P09172	DBH
228	uniprot.P09237_ukb.OID20087_decode.2789_26	P09237	MMP7
229	uniprot.P09238_ukb.OID20687_decode.8479_4	P09238	MMP10
230	uniprot.P09326_ukb.OID20692_decode.3292_75	P09326	CD48
231	uniprot.P09341_ukb.OID20762_decode.2985_35	P09341	CXCL1
232	uniprot.P09529_ukb.OID30625_decode.16746_12	P09529	INHBB
233	uniprot.P09529_ukb.OID30625_decode.13676_46	P09529	INHBB
234	uniprot.P09564_ukb.OID30543_decode.12008_3	P09564	CD7
235	uniprot.P09603_ukb.OID20719_decode.3738_54	P09603	CSF1
236	uniprot.P09693_ukb.OID30448_decode.7924_7	P09693	CD3G
237	uniprot.P09769_ukb.OID20828_decode.3810_50	P09769	FGR
238	uniprot.P09871_ukb.OID30731_decode.8840_61	P09871	C1S
239	uniprot.P09874_ukb.OID20500_decode.8893_29	P09874	PARP1
240	uniprot.P09874_ukb.OID20500_decode.10534_40	P09874	PARP1
241	uniprot.P09919_ukb.OID20491_decode.4840_73	P09919	CSF3
242	uniprot.P09923_ukb.OID30497_decode.17441_4	P09923	ALPI
243	uniprot.P0C862_ukb.OID30620_decode.16605_2	P0C862	C1QTNF9
244	uniprot.P0DJD7_ukb.OID30699_decode.NA	P0DJD7	PGA4
245	uniprot.P0DML2_ukb.OID30667_decode.NA	P0DML2	CSH1
246	uniprot.P0DMV8_ukb.OID20718_decode.4124_24	P0DMV8	HSPA1A
247	uniprot.P0DN86_ukb.OID30671_decode.NA	P0DN86	CGB3_CGB5_CGB8
248	uniprot.P0DOY2_ukb.OID30740_decode.NA	P0DOY2	IGLC2
249	uniprot.P0DUB6_P0DTE7_P0DTE8_ukb.OID30707_decode.NA	P0DUB6_P0DTE7_P0DTE8	AMY1A_AMY1B_AMY1C
250	uniprot.P10070_ukb.OID30429_decode.NA	P10070	GLI2
251	uniprot.P10144_ukb.OID20604_decode.4133_54	P10144	GZMB
252	uniprot.P10147_ukb.NA_decode.3040_59	P10147	CCL3
253	uniprot.P10147_ukb.OID20610_decode.3040_59	P10147	CCL3
254	uniprot.P10599_ukb.OID30670_decode.8813_160	P10599	TXN
255	uniprot.P10643_ukb.OID30766_decode.2888_49	P10643	C7
256	uniprot.P10767_ukb.OID30443_decode.4130_71	P10767	FGF6
257	uniprot.P10909_ukb.OID30732_decode.4542_24	P10909	CLU
258	uniprot.P10912_ukb.OID30574_decode.2948_58	P10912	GHR
259	uniprot.P11226_ukb.OID30759_decode.3000_66	P11226	MBL2
260	uniprot.P11234_ukb.OID30567_decode.18432_32	P11234	RALB
261	uniprot.P11274_ukb.OID20558_decode.NA	P11274	BCR
262	uniprot.P11487_ukb.OID30544_decode.7894_155	P11487	FGF3
263	uniprot.P11684_ukb.OID20688_decode.NA	P11684	SCGB1A1
264	uniprot.P12034_ukb.OID20490_decode.3065_65	P12034	FGF5
265	uniprot.P12532_ukb.OID20721_decode.15542_19	P12532	CKMT1A_CKMT1B
266	uniprot.P12544_ukb.OID20663_decode.3440_7	P12544	GZMA
267	uniprot.P12821_ukb.OID30696_decode.10714_7	P12821	ACE
268	uniprot.P12872_ukb.OID20541_decode.5631_83	P12872	MLN
269	uniprot.P12955_ukb.OID30688_decode.NA	P12955	PEPD
270	uniprot.P13232_ukb.OID20535_decode.4140_3	P13232	IL7
271	uniprot.P13236_ukb.OID20695_decode.NA	P13236	CCL4
272	uniprot.P13501_ukb.OID20412_decode.5480_49	P13501	CCL5
273	uniprot.P13693_ukb.OID20476_decode.3872_2	P13693	TPT1
274	uniprot.P13725_ukb.OID20574_decode.2693_20	P13725	OSM
275	uniprot.P13725_ukb.OID20574_decode.14063_17	P13725	OSM
276	uniprot.P13747_ukb.OID20532_decode.NA	P13747	HLA-E
277	uniprot.P14091_ukb.OID30628_decode.15376_134	P14091	CTSE
278	uniprot.P14151_ukb.OID30752_decode.4831_4	P14151	SELL
279	uniprot.P14174_ukb.OID21073_decode.8221_19	P14174	MIF
280	uniprot.P14210_ukb.OID20656_decode.2681_23	P14210	HGF
281	uniprot.P14317_ukb.OID20648_decode.NA	P14317	HCLS1
282	uniprot.P14780_ukb.OID21103_decode.2579_17	P14780	MMP9
283	uniprot.P14784_ukb.OID20450_decode.9343_16	P14784	IL2RB
284	uniprot.P15018_ukb.OID20824_decode.7790_21	P15018	LIF
285	uniprot.P15248_ukb.OID31298_decode.5834_18	P15248	IL9
286	uniprot.P15260_ukb.OID20678_decode.5825_49	P15260	IFNGR1
287	uniprot.P15291_ukb.OID20780_decode.13381_49	P15291	B4GALT1
288	uniprot.P15531_ukb.OID30451_decode.5909_51	P15531	NME1
289	uniprot.P15692_ukb.OID20650_decode.4867_15	P15692	VEGFA
290	uniprot.P15692_ukb.OID20650_decode.19437_61	P15692	VEGFA
291	uniprot.P15692_ukb.OID20650_decode.2597_8	P15692	VEGFA
292	uniprot.P15927_ukb.OID30453_decode.19264_6	P15927	RPA2
293	uniprot.P16233_ukb.OID30693_decode.15613_16	P16233	PNLIP
294	uniprot.P16422_ukb.OID20743_decode.NA	P16422	EPCAM
295	uniprot.P16442_ukb.OID30675_decode.9253_52	P16442	ABO
296	uniprot.P16455_ukb.OID20588_decode.NA	P16455	MGMT
297	uniprot.P16671_ukb.OID30485_decode.2973_15	P16671	CD36
298	uniprot.P17050_ukb.OID30509_decode.NA	P17050	NAGA
299	uniprot.P17301_ukb.OID30570_decode.15603_20	P17301	ITGA2
300	uniprot.P17643_ukb.OID30517_decode.NA	P17643	TYRP1
301	uniprot.P17927_ukb.OID30697_decode.19556_12	P17927	CR1
302	uniprot.P18510_ukb.OID20700_decode.5353_89	P18510	IL1RN
303	uniprot.P18564_ukb.OID20493_decode.7737_76	P18564	ITGB6
304	uniprot.P19256_ukb.OID20716_decode.10938_13	P19256	CD58
305	uniprot.P19320_ukb.OID20396_decode.2967_8	P19320	VCAM1
306	uniprot.P19474_ukb.OID20533_decode.NA	P19474	TRIM21
307	uniprot.P19801_ukb.OID20452_decode.15486_126	P19801	AOC1
308	uniprot.P19827_ukb.OID30722_decode.7955_195	P19827	ITIH1
309	uniprot.P19876_ukb.OID20788_decode.NA	P19876	CXCL3
310	uniprot.P19878_ukb.OID20567_decode.10047_12	P19878	NCF2
311	uniprot.P19883_ukb.OID20770_decode.4132_27	P19883	FST
312	uniprot.P20061_ukb.OID30687_decode.19614_8	P20061	TCN1
313	uniprot.P20155_ukb.OID30627_decode.13405_61	P20155	SPINK2
314	uniprot.P20273_ukb.OID20637_decode.NA	P20273	CD22
315	uniprot.P20340_ukb.OID20608_decode.NA	P20340	RAB6A
316	uniprot.P20701_ukb.OID30537_decode.11617_1	P20701	ITGAL
317	uniprot.P20742_ukb.OID30730_decode.6580_29	P20742	PZP
318	uniprot.P20783_ukb.OID20591_decode.4145_58	P20783	NTF3
319	uniprot.P20809_ukb.OID20455_decode.4493_92	P20809	IL11
320	uniprot.P20849_ukb.OID20550_decode.15466_30	P20849	COL9A1
321	uniprot.P20849_ukb.OID20550_decode.6631_17	P20849	COL9A1
322	uniprot.P20908_ukb.OID30587_decode.NA	P20908	COL5A1
323	uniprot.P21583_ukb.NA_decode.9377_25	P21583	KITLG
324	uniprot.P21709_ukb.OID20677_decode.3431_54	P21709	EPHA1
325	uniprot.P21854_ukb.OID30641_decode.7009_8	P21854	CD72
326	uniprot.P21860_ukb.OID20705_decode.2617_56	P21860	ERBB3
327	uniprot.P22301_ukb.OID20431_decode.2773_50	P22301	IL10
328	uniprot.P22303_ukb.OID30585_decode.15553_22	P22303	ACHE
329	uniprot.P22304_ukb.OID20619_decode.3198_4	P22304	IDS
330	uniprot.P22455_ukb.OID30646_decode.4988_49	P22455	FGFR4
331	uniprot.P22466_ukb.OID20727_decode.15390_3	P22466	GAL
332	uniprot.P22894_ukb.OID21019_decode.9172_69	P22894	MMP8
333	uniprot.P22897_ukb.OID30694_decode.2637_77	P22897	MRC1
334	uniprot.P23229_ukb.OID20528_decode.NA	P23229	ITGA6
335	uniprot.P23582_ukb.OID20568_decode.NA	P23582	NPPC
336	uniprot.P23743_ukb.OID30546_decode.NA	P23743	DGKA
337	uniprot.P24001_ukb.OID20605_decode.9051_13	P24001	IL32
338	uniprot.P24071_ukb.OID20564_decode.4987_17	P24071	FCAR
339	uniprot.P24387_ukb.OID20747_decode.6039_24	P24387	CRHBP
340	uniprot.P24394_ukb.OID20576_decode.3055_54	P24394	IL4R
341	uniprot.P24530_ukb.OID30421_decode.NA	P24530	EDNRB
342	uniprot.P24666_ukb.OID30524_decode.3858_5	P24666	ACP1
343	uniprot.P24864_ukb.OID30456_decode.NA	P24864	CCNE1
344	uniprot.P24928_ukb.OID30440_decode.NA	P24928	POLR2A
345	uniprot.P25116_ukb.OID20691_decode.NA	P25116	F2R
346	uniprot.P25445_ukb.OID20316_decode.9459_7	P25445	FAS
347	uniprot.P25445_ukb.OID20316_decode.5392_73	P25445	FAS
348	uniprot.P25490_ukb.OID30446_decode.17337_1	P25490	YY1
349	uniprot.P25686_ukb.OID30661_decode.11438_6	P25686	DNAJB2
350	uniprot.P25942_ukb.OID20724_decode.NA	P25942	CD40
351	uniprot.P26022_ukb.OID20570_decode.6447_73	P26022	PTX3
352	uniprot.P26436_ukb.OID30513_decode.10507_166	P26436	ACRV1
353	uniprot.P26436_ukb.OID30513_decode.15301_24	P26436	ACRV1
354	uniprot.P26927_ukb.OID30713_decode.4407_10	P26927	MST1
355	uniprot.P26951_ukb.OID20461_decode.13744_37	P26951	IL3RA
356	uniprot.P27169_ukb.OID30704_decode.4261_55	P27169	PON1
357	uniprot.P27348_ukb.OID30605_decode.7625_27	P27348	YWHAQ
358	uniprot.P27540_ukb.OID20432_decode.NA	P27540	ARNT
359	uniprot.P27918_ukb.OID30784_decode.2960_66	P27918	CFP
360	uniprot.P27930_ukb.OID20757_decode.14133_93	P27930	IL1R2
361	uniprot.P28325_ukb.OID20995_decode.3803_10	P28325	CST5
362	uniprot.P28827_ukb.OID20598_decode.NA	P28827	PTPRM
363	uniprot.P28838_ukb.OID20436_decode.13959_7	P28838	LAP3
364	uniprot.P28838_ukb.OID20436_decode.15610_72	P28838	LAP3
365	uniprot.P28845_ukb.OID20575_decode.NA	P28845	HSD11B1
366	uniprot.P28906_ukb.OID21025_decode.NA	P28906	CD34
367	uniprot.P29279_ukb.OID20709_decode.2975_19	P29279	CCN2
368	uniprot.P29350_ukb.OID20717_decode.4318_12	P29350	PTPN6
369	uniprot.P29460_ukb.OID20666_decode.13733_5	P29460	IL12B
370	uniprot.P29622_ukb.OID30774_decode.3449_58	P29622	SERPINA4
371	uniprot.P29965_ukb.OID20616_decode.3534_14	P29965	CD40LG
372	uniprot.P30040_ukb.OID30578_decode.13728_19	P30040	ERP29
373	uniprot.P30044_ukb.OID20644_decode.5017_19	P30044	PRDX5
374	uniprot.P30047_ukb.OID30631_decode.NA	P30047	GCHFR
375	uniprot.P30048_ukb.OID20483_decode.8358_30	P30048	PRDX3
376	uniprot.P30101_ukb.OID30573_decode.4719_58	P30101	PDIA3
377	uniprot.P30203_ukb.OID20649_decode.NA	P30203	CD6
378	uniprot.P30613_ukb.OID20682_decode.15607_56	P30613	PKLR
379	uniprot.P30838_ukb.OID20512_decode.11480_1	P30838	ALDH3A1
380	uniprot.P32119_ukb.OID30668_decode.NA	P32119	PRDX2
381	uniprot.P32321_ukb.OID30657_decode.17756_69	P32321	DCTD
382	uniprot.P32456_ukb.OID20489_decode.18891_98	P32456	GBP2
383	uniprot.P32927_ukb.OID30553_decode.11137_43	P32927	CSF2RB
384	uniprot.P32927_ukb.OID30553_decode.10512_13	P32927	CSF2RB
385	uniprot.P32970_ukb.OID20599_decode.5807_77	P32970	CD70
386	uniprot.P33241_ukb.OID20530_decode.NA	P33241	LSP1
387	uniprot.P34096_ukb.OID30705_decode.5644_60	P34096	RNASE4
388	uniprot.P34896_ukb.OID20714_decode.12334_25	P34896	SHMT1
389	uniprot.P35219_ukb.OID30482_decode.11390_24	P35219	CA8
390	uniprot.P35225_ukb.OID20430_decode.3072_4	P35225	IL13
391	uniprot.P35542_ukb.OID30726_decode.15516_12	P35542	SAA4
392	uniprot.P35611_ukb.OID30655_decode.NA	P35611	ADD1
393	uniprot.P35613_ukb.OID20626_decode.3585_54	P35613	BSG
394	uniprot.P35625_ukb.OID20684_decode.2480_58	P35625	TIMP3
395	uniprot.P36551_ukb.OID30495_decode.18241_18	P36551	CPOX
396	uniprot.P36897_ukb.OID30502_decode.NA	P36897	TGFBR1
397	uniprot.P36941_ukb.OID20768_decode.2636_10	P36941	LTBR
398	uniprot.P36955_ukb.OID30757_decode.9211_19	P36955	SERPINF1
399	uniprot.P36959_ukb.OID20641_decode.19254_125	P36959	GMPR
400	uniprot.P36980_ukb.OID30720_decode.15584_9	P36980	CFHR2
401	uniprot.P37235_ukb.OID20615_decode.17791_25	P37235	HPCAL1
402	uniprot.P37840_ukb.OID30645_decode.8458_111	P37840	SNCA
403	uniprot.P39900_ukb.OID21439_decode.4496_60	P39900	MMP12
404	uniprot.P39905_ukb.OID20861_decode.5822_22	P39905	GDNF
405	uniprot.P40197_ukb.OID30611_decode.7185_29	P40197	GP5
406	uniprot.P40259_ukb.OID20635_decode.6351_55	P40259	CD79B
407	uniprot.P40925_ukb.OID30669_decode.3853_56	P40925	MDH1
408	uniprot.P40933_ukb.OID20562_decode.19568_17	P40933	IL15
409	uniprot.P41159_ukb.OID20187_decode.8484_24	P41159	LEP
410	uniprot.P41217_ukb.OID20603_decode.5112_73	P41217	CD200
411	uniprot.P42575_ukb.OID20555_decode.4904_7	P42575	CASP2
412	uniprot.P42701_ukb.OID20486_decode.2632_5	P42701	IL12RB1
413	uniprot.P42702_ukb.OID20606_decode.5837_49	P42702	LIFR
414	uniprot.P42768_ukb.OID20479_decode.NA	P42768	WAS
415	uniprot.P42830_ukb.OID20207_decode.2979_8	P42830	CXCL5
416	uniprot.P43234_ukb.OID20660_decode.9264_11	P43234	CTSO
417	uniprot.P43251_ukb.OID30754_decode.15644_1	P43251	BTD
418	uniprot.P43378_ukb.OID30437_decode.12633_3	P43378	PTPN9
419	uniprot.P43489_ukb.OID20653_decode.3730_81	P43489	TNFRSF4
420	uniprot.P43652_ukb.OID30741_decode.4763_31	P43652	AFM
421	uniprot.P45452_ukb.OID20807_decode.4925_54	P45452	MMP13
422	uniprot.P45984_ukb.OID20557_decode.15604_18	P45984	MAPK9
423	uniprot.P46013_ukb.OID30455_decode.NA	P46013	MKI67
424	uniprot.P46109_ukb.OID20742_decode.9877_28	P46109	CRKL
425	uniprot.P47712_ukb.OID20685_decode.NA	P47712	PLA2G4A
426	uniprot.P48023_ukb.OID20665_decode.3052_8	P48023	FASLG
427	uniprot.P48061_ukb.OID20464_decode.3516_60	P48061	CXCL12
428	uniprot.P48061_ukb.OID20464_decode.9278_9	P48061	CXCL12
429	uniprot.P48546_ukb.OID30542_decode.NA	P48546	GIPR
430	uniprot.P48730_ukb.OID30492_decode.11289_31	P48730	CSNK1D
431	uniprot.P49715_ukb.OID30458_decode.18874_66	P49715	CEBPA
432	uniprot.P49757_ukb.OID30568_decode.NA	P49757	NUMB
433	uniprot.P49763_ukb.OID20673_decode.3078_1	P49763	PGF
434	uniprot.P49765_ukb.OID30554_decode.9453_12	P49765	VEGFB
435	uniprot.P49771_ukb.OID20661_decode.14093_10	P49771	FLT3LG
436	uniprot.P49862_ukb.OID30652_decode.3378_49	P49862	KLK7
437	uniprot.P49908_ukb.OID30745_decode.NA	P49908	SELENOP
438	uniprot.P50452_ukb.OID20630_decode.19130_81	P50452	SERPINB8
439	uniprot.P50502_ukb.OID30624_decode.18387_7	P50502	ST13
440	uniprot.P50552_ukb.OID30692_decode.9762_14	P50552	VASP
441	uniprot.P50591_ukb.OID20611_decode.8833_20	P50591	TNFSF10
442	uniprot.P50995_ukb.OID20583_decode.17513_11	P50995	ANXA11
443	uniprot.P51617_ukb.OID20485_decode.NA	P51617	IRAK1
444	uniprot.P51671_ukb.OID20668_decode.5301_7	P51671	CCL11
445	uniprot.P51888_ukb.OID20766_decode.NA	P51888	PRELP
446	uniprot.P52564_ukb.OID20552_decode.17175_5	P52564	MAP2K6
447	uniprot.P52630_ukb.OID30536_decode.NA	P52630	STAT2
448	uniprot.P52758_ukb.OID30635_decode.14636_25	P52758	RIDA
449	uniprot.P53634_ukb.OID20679_decode.3178_5	P53634	CTSC
450	uniprot.P54108_ukb.OID30715_decode.3187_52	P54108	CRISP3
451	uniprot.P54274_ukb.OID30480_decode.10049_112	P54274	TERF1
452	uniprot.P54317_ukb.OID20775_decode.15471_29	P54317	PNLIPRP2
453	uniprot.P54764_ukb.OID30622_decode.16288_17	P54764	EPHA4
454	uniprot.P55083_ukb.OID30598_decode.5636_10	P55083	MFAP4
455	uniprot.P55145_ukb.OID20707_decode.9223_11	P55145	MANF
456	uniprot.P55211_ukb.OID30530_decode.NA	P55211	CASP9
457	uniprot.P55773_ukb.OID20693_decode.3028_36	P55773	CCL23
458	uniprot.P55773_ukb.OID20693_decode.2913_1	P55773	CCL23
459	uniprot.P55957_ukb.OID20517_decode.5798_3	P55957	BID
460	uniprot.P56192_ukb.OID30658_decode.NA	P56192	MARS1
461	uniprot.P56470_ukb.OID20748_decode.2982_82	P56470	LGALS4
462	uniprot.P56645_ukb.OID30511_decode.NA	P56645	PER3
463	uniprot.P57771_ukb.OID20454_decode.11666_72	P57771	RGS8
464	uniprot.P58294_ukb.OID20543_decode.2247_20	P58294	PROK1
465	uniprot.P60568_ukb.OID20419_decode.3070_1	P60568	IL2
466	uniprot.P61328_ukb.OID30454_decode.4392_54	P61328	FGF12
467	uniprot.P61457_ukb.OID30610_decode.11313_100	P61457	PCBD1
468	uniprot.P61769_ukb.OID30725_decode.10574_10	P61769	B2M
469	uniprot.P61769_ukb.OID30725_decode.3485_28	P61769	B2M
470	uniprot.P62834_ukb.OID30452_decode.NA	P62834	RAP1A
471	uniprot.P63241_ukb.OID20423_decode.5888_29	P63241	EIF5A
472	uniprot.P68106_ukb.OID20618_decode.11568_2	P68106	FKBP1B
473	uniprot.P78310_ukb.OID20561_decode.11204_80	P78310	CXADR
474	uniprot.P78362_ukb.OID20502_decode.NA	P78362	SRPK2
475	uniprot.P78410_ukb.OID20540_decode.NA	P78410	BTN3A2
476	uniprot.P78423_ukb.OID20976_decode.2827_23	P78423	CX3CL1
477	uniprot.P78556_ukb.NA_decode.2468_62	P78556	CCL20
478	uniprot.P78556_ukb.OID20671_decode.2468_62	P78556	CCL20
479	uniprot.P80098_ukb.OID20523_decode.4886_3	P80098	CCL7
480	uniprot.P80162_ukb.OID20613_decode.3495_15	P80162	CXCL6
481	uniprot.P80511_ukb.OID21374_decode.5852_6	P80511	S100A12
482	uniprot.P81534_ukb.OID30534_decode.5679_16	P81534	DEFB103A_DEFB103B
483	uniprot.P85299_ukb.OID30457_decode.NA	P85299	PRR5
484	uniprot.P98170_ukb.OID30490_decode.NA	P98170	XIAP
485	uniprot.Q01151_ukb.OID20565_decode.5065_8	Q01151	CD83
486	uniprot.Q01201_ukb.OID30463_decode.11464_9	Q01201	RELB
487	uniprot.Q01344_ukb.OID20601_decode.13686_2	Q01344	IL5RA
488	uniprot.Q01459_ukb.OID30710_decode.NA	Q01459	CTBS
489	uniprot.Q02223_ukb.OID30589_decode.2665_26	Q02223	TNFRSF17
490	uniprot.Q02880_ukb.OID30559_decode.NA	Q02880	TOP2B
491	uniprot.Q02952_ukb.OID30571_decode.NA	Q02952	AKAP12
492	uniprot.Q03403_ukb.OID20787_decode.9191_8	Q03403	TFF2
493	uniprot.Q03405_ukb.OID20764_decode.2652_15	Q03405	PLAUR
494	uniprot.Q03426_ukb.OID20459_decode.11391_69	Q03426	MVK
495	uniprot.Q03431_ukb.OID20571_decode.13470_43	Q03431	PTH1R
496	uniprot.Q04323_ukb.OID30654_decode.NA	Q04323	UBXN1
497	uniprot.Q04609_ukb.OID30430_decode.5478_50	Q04609	FOLH1
498	uniprot.Q04637_ukb.OID20625_decode.NA	Q04637	EIF4G1
499	uniprot.Q04756_ukb.OID30718_decode.3617_80	Q04756	HGFAC
500	uniprot.Q04759_ukb.OID20468_decode.3817_18	Q04759	PRKCQ
501	uniprot.Q04837_ukb.OID30468_decode.NA	Q04837	SSBP1
502	uniprot.Q05084_ukb.OID20484_decode.NA	Q05084	ICA1
503	uniprot.Q05329_ukb.OID30449_decode.NA	Q05329	GAD2
504	uniprot.Q06520_ukb.OID20508_decode.9829_91	Q06520	SULT2A1
505	uniprot.Q07065_ukb.OID20617_decode.7221_56	Q07065	CKAP4
506	uniprot.Q07325_ukb.OID20675_decode.9188_119	Q07325	CXCL9
507	uniprot.Q07325_ukb.OID20675_decode.11593_21	Q07325	CXCL9
508	uniprot.Q08174_ukb.OID20614_decode.NA	Q08174	PCDH1
509	uniprot.Q08334_ukb.OID20696_decode.2631_50	Q08334	IL10RB
510	uniprot.Q08380_ukb.OID30765_decode.5000_52	Q08380	LGALS3BP
511	uniprot.Q08830_ukb.OID30702_decode.5581_28	Q08830	FGL1
512	uniprot.Q09472_ukb.OID30438_decode.NA	Q09472	EP300
513	uniprot.Q0Z7S8_ukb.OID20501_decode.18194_18	Q0Z7S8	FABP9
514	uniprot.Q0ZGT2_ukb.OID30678_decode.NA	Q0ZGT2	NEXN
515	uniprot.Q12765_ukb.OID20542_decode.NA	Q12765	SCRN1
516	uniprot.Q12778_ukb.OID20515_decode.NA	Q12778	FOXO1
517	uniprot.Q12866_ukb.OID20657_decode.NA	Q12866	MERTK
518	uniprot.Q12888_ukb.OID30470_decode.NA	Q12888	TP53BP1
519	uniprot.Q12918_ukb.OID20629_decode.10809_14	Q12918	KLRB1
520	uniprot.Q12933_ukb.OID20507_decode.NA	Q12933	TRAF2
521	uniprot.Q12968_ukb.OID20470_decode.NA	Q12968	NFATC3
522	uniprot.Q13007_ukb.OID20440_decode.3321_2	Q13007	IL24
523	uniprot.Q13114-2_ukb.OID30479_decode.NA	Q13114-2	TRAF3
524	uniprot.Q13190_ukb.OID30432_decode.NA	Q13190	STX5
525	uniprot.Q13219_ukb.OID20421_decode.4148_49	Q13219	PAPPA
526	uniprot.Q13232_ukb.OID20789_decode.NA	Q13232	NME3
527	uniprot.Q13241_ukb.OID20632_decode.NA	Q13241	KLRD1
528	uniprot.Q13261_ukb.OID20498_decode.14054_17	Q13261	IL15RA
529	uniprot.Q13261_ukb.OID20498_decode.3445_53	Q13261	IL15RA
530	uniprot.Q13291_ukb.OID20496_decode.7953_20	Q13291	SLAMF1
531	uniprot.Q13459_ukb.OID20451_decode.NA	Q13459	MYO9B
532	uniprot.Q13478_ukb.OID20652_decode.14079_14	Q13478	IL18R1
533	uniprot.Q13574_ukb.OID20466_decode.NA	Q13574	DGKZ
534	uniprot.Q13651_ukb.OID20420_decode.8104_21	Q13651	IL10RA
535	uniprot.Q13651_ukb.OID20420_decode.10344_334	Q13651	IL10RA
536	uniprot.Q13790_ukb.OID30701_decode.12370_30	Q13790	APOF
537	uniprot.Q13976_ukb.OID30621_decode.13067_5	Q13976	PRKG1
538	uniprot.Q14005_ukb.OID20633_decode.2774_10	Q14005	IL16
539	uniprot.Q14116_ukb.OID20694_decode.5661_15	Q14116	IL18
540	uniprot.Q14118_ukb.OID20774_decode.8369_102	Q14118	DAG1
541	uniprot.Q14210_ukb.OID20708_decode.NA	Q14210	LY6D
542	uniprot.Q14242_ukb.OID20560_decode.11266_8	Q14242	SELPLG
543	uniprot.Q14435_ukb.OID20471_decode.6593_5	Q14435	GALNT3
544	uniprot.Q14511_ukb.OID30503_decode.12862_14	Q14511	NEDD9
545	uniprot.Q14624_ukb.OID30762_decode.4811_33	Q14624	ITIH4
546	uniprot.Q14773_ukb.OID20578_decode.6550_4	Q14773	ICAM4
547	uniprot.Q15109_ukb.OID20756_decode.4125_52	Q15109	AGER
548	uniprot.Q15166_ukb.OID20777_decode.NA	Q15166	PON3
549	uniprot.Q15223_ukb.OID30545_decode.8803_61	Q15223	NECTIN1
550	uniprot.Q15276_ukb.OID30647_decode.NA	Q15276	RABEP1
551	uniprot.Q15389_ukb.OID20740_decode.2811_27	Q15389	ANGPT1
552	uniprot.Q15399_ukb.OID30532_decode.16324_38	Q15399	TLR1
553	uniprot.Q15399_ukb.OID30532_decode.11149_3	Q15399	TLR1
554	uniprot.Q15465_ukb.OID30516_decode.2743_5	Q15465	SHH
555	uniprot.Q15517_ukb.OID20667_decode.7085_81	Q15517	CDSN
556	uniprot.Q15661_ukb.OID20642_decode.9409_11	Q15661	TPSAB1
557	uniprot.Q15697_ukb.OID30508_decode.11486_26	Q15697	ZNF174
558	uniprot.Q15762_ukb.OID30556_decode.5062_60	Q15762	CD226
559	uniprot.Q15848_ukb.OID30748_decode.3554_24	Q15848	ADIPOQ
560	uniprot.Q16363_ukb.OID20769_decode.6577_64	Q16363	LAMA4
561	uniprot.Q16378_ukb.OID30607_decode.NA	Q16378	PRR4
562	uniprot.Q16552_ukb.OID20469_decode.9170_24	Q16552	IL17A
563	uniprot.Q16610_ukb.OID30736_decode.3366_51	Q16610	ECM1
564	uniprot.Q16643_ukb.OID30549_decode.NA	Q16643	DBN1
565	uniprot.Q16651_ukb.OID20763_decode.15513_108	Q16651	PRSS8
566	uniprot.Q16663_ukb.NA_decode.18289_16	Q16663	CCL15
567	uniprot.Q16665_ukb.OID30425_decode.13089_6	Q16665	HIF1A
568	uniprot.Q16698_ukb.OID20579_decode.12687_2	Q16698	DECR1
569	uniprot.Q16718_ukb.OID30520_decode.19200_16	Q16718	NDUFA5
570	uniprot.Q16719_ukb.OID20669_decode.4559_64	Q16719	KYNU
571	uniprot.Q29980_Q29983_ukb.OID20593_decode.NA	Q29980_Q29983	MICB_MICA
572	uniprot.Q3KPI0_ukb.OID20548_decode.7204_1	Q3KPI0	CEACAM21
573	uniprot.Q4KMG0_ukb.OID20754_decode.4541_49	Q4KMG0	CDON
574	uniprot.Q4VCS5_ukb.OID30572_decode.NA	Q4VCS5	AMOT
575	uniprot.Q53FA7_ukb.OID30632_decode.17748_21	Q53FA7	TP53I3
576	uniprot.Q58EX2_ukb.OID30662_decode.NA	Q58EX2	SDK2
577	uniprot.Q5JS37_ukb.OID30614_decode.9087_8	Q5JS37	NHLRC3
578	uniprot.Q5JS54_ukb.OID30514_decode.NA	Q5JS54	PSMG4
579	uniprot.Q5KU26_ukb.OID20738_decode.5457_5	Q5KU26	COLEC12
580	uniprot.Q5QGZ9_ukb.OID30552_decode.11187_11	Q5QGZ9	CLEC12A
581	uniprot.Q5R372_ukb.OID20447_decode.NA	Q5R372	RABGAP1L
582	uniprot.Q5T2W1_ukb.OID30550_decode.16852_10	Q5T2W1	PDZK1
583	uniprot.Q5T4W7_ukb.OID20446_decode.2939_10	Q5T4W7	ARTN
584	uniprot.Q5TBC7_ukb.OID30498_decode.NA	Q5TBC7	BCL2L15
585	uniprot.Q5TDH0_ukb.OID30602_decode.NA	Q5TDH0	DDI2
586	uniprot.Q5VTT5_ukb.OID30633_decode.13966_30	Q5VTT5	MYOM3
587	uniprot.Q5ZPR3_ukb.OID20680_decode.NA	Q5ZPR3	CD276
588	uniprot.Q6B9Z1_ukb.OID30500_decode.NA	Q6B9Z1	IGFL4
589	uniprot.Q6DN72_ukb.OID20529_decode.6617_12	Q6DN72	FCRL6
590	uniprot.Q6EBC2_ukb.OID30487_decode.10455_196	Q6EBC2	IL31
591	uniprot.Q6FHJ7_ukb.OID30648_decode.17447_52	Q6FHJ7	SFRP4
592	uniprot.Q6GMV3_ukb.OID30659_decode.NA	Q6GMV3	PTRHD1
593	uniprot.Q6GTX8_ukb.OID20737_decode.11284_24	Q6GTX8	LAIR1
594	uniprot.Q6P589_ukb.OID30629_decode.NA	Q6P589	TNFAIP8L2
595	uniprot.Q6P5S2_ukb.OID30608_decode.7154_92	Q6P5S2	LEG1
596	uniprot.Q6QNK2_ukb.OID30588_decode.NA	Q6QNK2	ADGRD1
597	uniprot.Q6R327_ukb.OID30433_decode.NA	Q6R327	RICTOR
598	uniprot.Q6UB28_ukb.OID20519_decode.NA	Q6UB28	METAP1D
599	uniprot.Q6UWV6_ukb.OID20689_decode.4435_66	Q6UWV6	ENPP7
600	uniprot.Q6UX06_ukb.OID30665_decode.4769_10	Q6UX06	OLFM4
601	uniprot.Q6UXB2_ukb.OID20622_decode.9495_10	Q6UXB2	CXCL17
602	uniprot.Q6UXB4_ukb.OID20590_decode.10781_19	Q6UXB4	CLEC4G
603	uniprot.Q6UXB8_ukb.OID30676_decode.NA	Q6UXB8	PI16
604	uniprot.Q6UXH1_ukb.OID20751_decode.NA	Q6UXH1	CRELD2
605	uniprot.Q6UXK5_ukb.OID20438_decode.11293_14	Q6UXK5	LRRN1
606	uniprot.Q6UXL0_ukb.OID30461_decode.13435_31	Q6UXL0	IL20RB
607	uniprot.Q6UXM1_ukb.OID30450_decode.3322_52	Q6UXM1	LRIG3
608	uniprot.Q6UXZ4_ukb.OID30447_decode.16307_22	Q6UXZ4	UNC5D
609	uniprot.Q6ZMH5_ukb.OID20539_decode.NA	Q6ZMH5	SLC39A5
610	uniprot.Q6ZUJ8_ukb.OID20587_decode.NA	Q6ZUJ8	PIK3AP1
611	uniprot.Q7KYR7_ukb.OID20713_decode.8869_5	Q7KYR7	BTN2A1
612	uniprot.Q7L8A9_ukb.OID20516_decode.NA	Q7L8A9	VASH1
613	uniprot.Q7Z5L3_ukb.OID30515_decode.15670_15	Q7Z5L3	C1QL2
614	uniprot.Q7Z698_ukb.OID30423_decode.NA	Q7Z698	SPRED2
615	uniprot.Q7Z6M3_ukb.OID20482_decode.11173_29	Q7Z6M3	MILR1
616	uniprot.Q7Z739_ukb.OID20478_decode.NA	Q7Z739	YTHDF3
617	uniprot.Q86SX6_ukb.OID30663_decode.16597_11	Q86SX6	GLRX5
618	uniprot.Q86UE4_ukb.OID30538_decode.NA	Q86UE4	MTDH
619	uniprot.Q86YW5_ukb.OID30682_decode.11147_17	Q86YW5	TREML1
620	uniprot.Q86YW5_ukb.OID30682_decode.9329_28	Q86YW5	TREML1
621	uniprot.Q8IU57_ukb.OID20506_decode.7192_37	Q8IU57	IFNLR1
622	uniprot.Q8IUZ5_ukb.OID30634_decode.NA	Q8IUZ5	PHYKPL
623	uniprot.Q8IV38_ukb.OID30518_decode.NA	Q8IV38	ANKMY2
624	uniprot.Q8IVG5_ukb.OID20536_decode.NA	Q8IVG5	SAMD9L
625	uniprot.Q8IX19_ukb.OID30501_decode.6283_60	Q8IX19	MCEMP1
626	uniprot.Q8IXJ6_ukb.OID21375_decode.5030_52	Q8IXJ6	SIRT2
627	uniprot.Q8IYS5_ukb.OID20776_decode.7116_31	Q8IYS5	OSCAR
628	uniprot.Q8IYW5_ukb.OID30506_decode.NA	Q8IYW5	RNF168
629	uniprot.Q8N0X7_ukb.OID30656_decode.11161_5	Q8N0X7	SPART
630	uniprot.Q8N556_ukb.OID30569_decode.NA	Q8N556	AFAP1
631	uniprot.Q8N608_ukb.OID20527_decode.7890_68	Q8N608	DPP10
632	uniprot.Q8N6P7_ukb.OID20449_decode.3620_67	Q8N6P7	IL22RA1
633	uniprot.Q8N8S7_ukb.OID20497_decode.9757_29	Q8N8S7	ENAH
634	uniprot.Q8N8U9_ukb.OID30615_decode.15368_3	Q8N8U9	BMPER
635	uniprot.Q8N907_ukb.OID30420_decode.NA	Q8N907	DAND5
636	uniprot.Q8NBK3_ukb.OID30486_decode.6941_11	Q8NBK3	SUMF1
637	uniprot.Q8NDA2_ukb.OID30592_decode.NA	Q8NDA2	HMCN2
638	uniprot.Q8NDB2_ukb.OID20594_decode.NA	Q8NDB2	BANK1
639	uniprot.Q8NEU8_ukb.OID30590_decode.NA	Q8NEU8	APPL2
640	uniprot.Q8NFT8_ukb.OID20712_decode.11442_1	Q8NFT8	DNER
641	uniprot.Q8NFT8_ukb.OID20712_decode.9769_48	Q8NFT8	DNER
642	uniprot.Q8NHJ6_ukb.OID20429_decode.6453_70	Q8NHJ6	LILRB4
643	uniprot.Q8NHP1_ukb.OID30488_decode.NA	Q8NHP1	AKR7L
644	uniprot.Q8NHV1_ukb.OID30639_decode.NA	Q8NHV1	GIMAP7
645	uniprot.Q8NI17_ukb.OID30475_decode.8273_84	Q8NI17	IL31RA
646	uniprot.Q8TAD2_ukb.OID20481_decode.4136_40	Q8TAD2	IL17D
647	uniprot.Q8TCS8_ukb.OID20445_decode.NA	Q8TCS8	PNPT1
648	uniprot.Q8TD46_ukb.OID20595_decode.5103_30	Q8TD46	CD200R1
649	uniprot.Q8TDQ7_ukb.OID30597_decode.NA	Q8TDQ7	GNPDA2
650	uniprot.Q8TEA8_ukb.OID30580_decode.19194_9	Q8TEA8	DTD1
651	uniprot.Q8TEU8_ukb.OID20785_decode.3235_50	Q8TEU8	WFIKKN2
652	uniprot.Q8WTT0_ukb.OID20547_decode.9094_5	Q8WTT0	CLEC4C
653	uniprot.Q8WU39_ukb.OID20732_decode.16322_10	Q8WU39	MZB1
654	uniprot.Q8WV07_ukb.OID20434_decode.18195_3	Q8WV07	LTO1
655	uniprot.Q8WV28_ukb.OID30541_decode.19225_11	Q8WV28	BLNK
656	uniprot.Q8WVV4_ukb.OID30504_decode.NA	Q8WVV4	POF1B
657	uniprot.Q8WX93_ukb.OID30444_decode.NA	Q8WX93	PALLD
658	uniprot.Q8WXD2_ukb.OID20728_decode.7957_2	Q8WXD2	SCG3
659	uniprot.Q8WXI8_ukb.OID20609_decode.7752_31	Q8WXI8	CLEC4D
660	uniprot.Q92185_ukb.OID30442_decode.NA	Q92185	ST8SIA1
661	uniprot.Q92484_ukb.OID20676_decode.4771_10	Q92484	SMPDL3A
662	uniprot.Q92496_ukb.OID30758_decode.6471_53	Q92496	CFHR4
663	uniprot.Q92574_ukb.OID30478_decode.NA	Q92574	TSC1
664	uniprot.Q92583_ukb.OID20745_decode.3519_3	Q92583	CCL17
665	uniprot.Q92609_ukb.OID20521_decode.9960_2	Q92609	TBC1D5
666	uniprot.Q92619_ukb.OID30653_decode.13544_9	Q92619	ARHGAP45
667	uniprot.Q92686_ukb.OID30674_decode.18303_39	Q92686	NRGN
668	uniprot.Q92844_ukb.OID20474_decode.14013_11	Q92844	TANK
669	uniprot.Q92956_ukb.OID20783_decode.5352_11	Q92956	TNFRSF14
670	uniprot.Q93062_ukb.OID30507_decode.NA	Q93062	RBPMS
671	uniprot.Q93091_ukb.OID30689_decode.5646_20	Q93091	RNASE6
672	uniprot.Q969V3_ukb.OID20448_decode.NA	Q969V3	NCLN
673	uniprot.Q96A49_ukb.OID30636_decode.NA	Q96A49	SYAP1
674	uniprot.Q96AJ9_ukb.OID30640_decode.7952_2	Q96AJ9	VTI1A
675	uniprot.Q96AX2_ukb.OID20425_decode.NA	Q96AX2	RAB37
676	uniprot.Q96D71_ukb.OID30496_decode.NA	Q96D71	REPS1
677	uniprot.Q96DB9_ukb.OID20463_decode.NA	Q96DB9	FXYD5
678	uniprot.Q96EB6_ukb.OID30439_decode.NA	Q96EB6	SIRT1
679	uniprot.Q96EP0_ukb.OID30473_decode.NA	Q96EP0	RNF31
680	uniprot.Q96HD1_ukb.OID30619_decode.7628_40	Q96HD1	CRELD1
681	uniprot.Q96IY4_ukb.OID30734_decode.3518_54	Q96IY4	CPB2
682	uniprot.Q96KG7_ukb.OID20746_decode.11168_3	Q96KG7	MEGF10
683	uniprot.Q96LA5_ukb.OID20639_decode.NA	Q96LA5	FCRL2
684	uniprot.Q96LC7_ukb.OID20537_decode.NA	Q96LC7	SIGLEC10
685	uniprot.Q96MM7_ukb.OID30481_decode.13524_25	Q96MM7	HS6ST2
686	uniprot.Q96P31_ukb.OID20443_decode.4440_15	Q96P31	FCRL3
687	uniprot.Q96PD4_ukb.OID20456_decode.14026_24	Q96PD4	IL17F
688	uniprot.Q96PD5_ukb.OID30742_decode.5601_2	Q96PD5	PGLYRP2
689	uniprot.Q96PL1_ukb.OID20723_decode.NA	Q96PL1	SCGB3A2
690	uniprot.Q96PL5_ukb.OID30539_decode.8631_13	Q96PL5	ERMAP
691	uniprot.Q96PU5_ukb.OID30521_decode.NA	Q96PU5	NEDD4L
692	uniprot.Q96PX8_ukb.OID30510_decode.15539_15	Q96PX8	SLITRK1
693	uniprot.Q96QR1_ukb.OID30577_decode.6252_62	Q96QR1	SCGB3A1
694	uniprot.Q96RJ3_ukb.OID20480_decode.5383_14	Q96RJ3	TNFRSF13C
695	uniprot.Q96SB3_ukb.OID20643_decode.NA	Q96SB3	PPP1R9B
696	uniprot.Q99062_ukb.OID30527_decode.2719_3	Q99062	CSF3R
697	uniprot.Q99435_ukb.OID20706_decode.6022_57	Q99435	NELL2
698	uniprot.Q99538_ukb.OID20773_decode.3622_33	Q99538	LGMN
699	uniprot.Q99574_ukb.OID30604_decode.NA	Q99574	SERPINI1
700	uniprot.Q99584_ukb.OID30529_decode.7223_60	Q99584	S100A13
701	uniprot.Q99616_ukb.OID20655_decode.4144_13	Q99616	CCL13
702	uniprot.Q99665_ukb.OID30422_decode.3815_14	Q99665	IL12RB2
703	uniprot.Q99685_ukb.OID20711_decode.NA	Q99685	MGLL
704	uniprot.Q99731_ukb.NA_decode.4922_13	Q99731	CCL19
705	uniprot.Q99748_ukb.OID20465_decode.NA	Q99748	NRTN
706	uniprot.Q99895_ukb.OID20752_decode.5626_20	Q99895	CTRC
707	uniprot.Q99983_ukb.OID20725_decode.5358_3	Q99983	OMD
708	uniprot.Q9BRK3_ukb.OID30583_decode.10521_10	Q9BRK3	MXRA8
709	uniprot.Q9BT73_ukb.OID20549_decode.12729_12	Q9BT73	PSMG3
710	uniprot.Q9BU40_ukb.OID20771_decode.3362_61	Q9BU40	CHRDL1
711	uniprot.Q9BUH6_ukb.OID30591_decode.NA	Q9BUH6	PAXX
712	uniprot.Q9BUN1_ukb.OID30595_decode.5744_12	Q9BUN1	MENT
713	uniprot.Q9BV40_ukb.OID30555_decode.7064_2	Q9BV40	VAMP8
714	uniprot.Q9BX67_ukb.OID30586_decode.2998_53	Q9BX67	JAM3
715	uniprot.Q9BXJ0_ukb.OID30618_decode.7810_20	Q9BXJ0	C1QTNF5
716	uniprot.Q9BXJ7_ukb.OID20492_decode.4322_28	Q9BXJ7	AMN
717	uniprot.Q9BXN2_ukb.OID20636_decode.3603_60	Q9BXN2	CLEC7A
718	uniprot.Q9BXR6_ukb.OID30716_decode.16055_3	Q9BXR6	CFHR5
719	uniprot.Q9BY41_ukb.OID30436_decode.2859_69	Q9BY41	HDAC8
720	uniprot.Q9BY76_ukb.OID20703_decode.3796_79	Q9BY76	ANGPTL4
721	uniprot.Q9BYZ8_ukb.OID20784_decode.11102_22	Q9BYZ8	REG4
722	uniprot.Q9BZW8_ukb.OID20628_decode.5063_12	Q9BZW8	CD244
723	uniprot.Q9BZZ2_ukb.OID20690_decode.4464_10	Q9BZZ2	SIGLEC1
724	uniprot.Q9C035_ukb.OID20526_decode.NA	Q9C035	TRIM5
725	uniprot.Q9GZN4_ukb.OID30483_decode.4534_10	Q9GZN4	PRSS22
726	uniprot.Q9GZT9_ukb.OID20572_decode.9901_28	Q9GZT9	EGLN1
727	uniprot.Q9GZV9_ukb.OID21411_decode.3807_1	Q9GZV9	FGF23
728	uniprot.Q9H008_ukb.OID20749_decode.NA	Q9H008	LHPP
729	uniprot.Q9H0P0_ukb.OID20553_decode.19615_213	Q9H0P0	NT5C3A
730	uniprot.Q9H0U9_ukb.OID30512_decode.NA	Q9H0U9	TSPYL1
731	uniprot.Q9H171_ukb.OID30526_decode.NA	Q9H171	ZBP1
732	uniprot.Q9H3T2_ukb.OID30531_decode.14597_5	Q9H3T2	SEMA6C
733	uniprot.Q9H3T2_ukb.OID30531_decode.7202_107	Q9H3T2	SEMA6C
734	uniprot.Q9H3U7_ukb.OID20730_decode.15635_4	Q9H3U7	SMOC2
735	uniprot.Q9H4D0_ukb.OID20664_decode.18882_7	Q9H4D0	CLSTN2
736	uniprot.Q9H5V8_ukb.OID20940_decode.16818_200	Q9H5V8	CDCP1
737	uniprot.Q9H5V8_ukb.OID20940_decode.8589_13	Q9H5V8	CDCP1
738	uniprot.Q9H7Y0_ukb.OID30582_decode.NA	Q9H7Y0	DIPK2B
739	uniprot.Q9H7Z7_ukb.OID30561_decode.18458_4	Q9H7Z7	PTGES2
740	uniprot.Q9H832_ukb.OID30427_decode.NA	Q9H832	UBE2Z
741	uniprot.Q9H939_ukb.OID30596_decode.NA	Q9H939	PSTPIP2
742	uniprot.Q9HB29_ukb.OID20487_decode.2994_71	Q9HB29	IL1RL2
743	uniprot.Q9HB71_ukb.OID30649_decode.12432_23	Q9HB71	CACYBP
744	uniprot.Q9HBE5_ukb.OID30441_decode.9366_54	Q9HBE5	IL21R
745	uniprot.Q9HBG7_ukb.OID20670_decode.3324_51	Q9HBG7	LY9
746	uniprot.Q9HC38_ukb.OID20710_decode.NA	Q9HC38	GLOD4
747	uniprot.Q9HCB6_ukb.OID20759_decode.4297_62	Q9HCB6	SPON1
748	uniprot.Q9HCM2_ukb.OID20597_decode.19560_23	Q9HCM2	PLXNA4
749	uniprot.Q9HCU4_ukb.OID30593_decode.NA	Q9HCU4	CELSR2
750	uniprot.Q9HCU5_ukb.OID20439_decode.NA	Q9HCU5	PREB
751	uniprot.Q9HD26_ukb.OID20551_decode.NA	Q9HD26	GOPC
752	uniprot.Q9NP70_ukb.OID20437_decode.NA	Q9NP70	AMBN
753	uniprot.Q9NP85_ukb.OID30462_decode.NA	Q9NP85	NPHS2
754	uniprot.Q9NP95_ukb.OID30459_decode.2763_66	Q9NP95	FGF20
755	uniprot.Q9NQ25_ukb.OID20602_decode.5487_7	Q9NQ25	SLAMF7
756	uniprot.Q9NQ30_ukb.OID20758_decode.3805_16	Q9NQ30	ESM1
757	uniprot.Q9NQ48_ukb.OID30637_decode.NA	Q9NQ48	LZTFL1
758	uniprot.Q9NQ66_ukb.OID30484_decode.11354_21	Q9NQ66	PLCB1
759	uniprot.Q9NQ76_ukb.OID20753_decode.3209_69	Q9NQ76	MEPE
760	uniprot.Q9NQI0_ukb.OID30431_decode.NA	Q9NQI0	DDX4
761	uniprot.Q9NR12_ukb.OID20729_decode.NA	Q9NR12	PDLIM7
762	uniprot.Q9NRA1_ukb.OID21183_decode.13658_31	Q9NRA1	PDGFC
763	uniprot.Q9NRJ3_ukb.OID20569_decode.2890_59	Q9NRJ3	CCL28
764	uniprot.Q9NRM6_ukb.OID20585_decode.6262_14	Q9NRM6	IL17RB
765	uniprot.Q9NRR2_ukb.OID30424_decode.3404_51	Q9NRR2	TPSG1
766	uniprot.Q9NRS6_ukb.OID30644_decode.NA	Q9NRS6	SNX15
767	uniprot.Q9NS62_ukb.OID30476_decode.5621_64	Q9NS62	THSD1
768	uniprot.Q9NS98_ukb.OID30599_decode.5628_21	Q9NS98	SEMA3G
769	uniprot.Q9NWV8_ukb.OID30466_decode.NA	Q9NWV8	BABAM1
770	uniprot.Q9NWZ3_ukb.OID20577_decode.18162_167	Q9NWZ3	IRAK4
771	uniprot.Q9NY59_ukb.OID30477_decode.NA	Q9NY59	SMPD3
772	uniprot.Q9NYY1_ukb.OID20453_decode.4138_25	Q9NYY1	IL20
773	uniprot.Q9NZC2_ukb.OID20731_decode.16300_4	Q9NZC2	TREM2
774	uniprot.Q9NZH8_ukb.OID30551_decode.9117_4	Q9NZH8	IL36G
775	uniprot.Q9NZK5_ukb.NA_decode.6077_63	Q9NZK5	ADA2
776	uniprot.Q9NZN5_ukb.OID20554_decode.NA	Q9NZN5	ARHGEF12
777	uniprot.Q9NZP8_ukb.OID30721_decode.9348_1	Q9NZP8	C1RL
778	uniprot.Q9NZS2_ukb.OID30464_decode.5098_79	Q9NZS2	KLRF1
779	uniprot.Q9NZV1_ukb.OID20701_decode.8699_43	Q9NZV1	CRIM1
780	uniprot.Q9NZV1_ukb.OID20701_decode.15492_1	Q9NZV1	CRIM1
781	uniprot.Q9P0M4_ukb.OID20477_decode.9255_5	Q9P0M4	IL17C
782	uniprot.Q9P2T1_ukb.OID30623_decode.19446_1	Q9P2T1	GMPR2
783	uniprot.Q9UDT6_ukb.OID20559_decode.NA	Q9UDT6	CLIP2
784	uniprot.Q9UGN4_ukb.OID30576_decode.5630_48	Q9UGN4	CD300A
785	uniprot.Q9UHA7_ukb.OID30472_decode.14150_7	Q9UHA7	IL36A
786	uniprot.Q9UHC6_ukb.OID20556_decode.6965_19	Q9UHC6	CNTNAP2
787	uniprot.Q9UHF4_ukb.OID20422_decode.5085_18	Q9UHF4	IL20RA
788	uniprot.Q9UHI8_ukb.OID30528_decode.3174_2	Q9UHI8	ADAMTS1
789	uniprot.Q9UHN6_ukb.OID30499_decode.8992_1	Q9UHN6	CEMIP2
790	uniprot.Q9UHX3_ukb.OID20755_decode.4546_27	Q9UHX3	ADGRE2
791	uniprot.Q9UI42_ukb.OID30606_decode.9267_2	Q9UI42	CPA4
792	uniprot.Q9UIB8_ukb.OID20607_decode.NA	Q9UIB8	CD84
793	uniprot.Q9UII2_ukb.OID20760_decode.NA	Q9UII2	ATP5IF1
794	uniprot.Q9UIK4_ukb.OID30505_decode.4355_13	Q9UIK4	DAPK2
795	uniprot.Q9UJA9_ukb.OID20736_decode.6556_5	Q9UJA9	ENPP5
796	uniprot.Q9UJU6_ukb.OID20681_decode.4978_54	Q9UJU6	DBNL
797	uniprot.Q9UK23_ukb.OID30643_decode.11208_15	Q9UK23	NAGPA
798	uniprot.Q9UKU9_ukb.OID20726_decode.NA	Q9UKU9	ANGPTL2
799	uniprot.Q9UKX5_ukb.OID20581_decode.NA	Q9UKX5	ITGA11
800	uniprot.Q9ULI3_ukb.OID30579_decode.NA	Q9ULI3	HEG1
801	uniprot.Q9UMR7_ukb.OID20573_decode.8853_2	Q9UMR7	CLEC4A
802	uniprot.Q9UN19_ukb.OID20524_decode.11615_16	Q9UN19	DAPP1
803	uniprot.Q9UNE0_ukb.OID20525_decode.2977_7	Q9UNE0	EDAR
804	uniprot.Q9UNK0_ukb.OID20531_decode.10903_50	Q9UNK0	STX8
805	uniprot.Q9UPV0_ukb.OID20441_decode.NA	Q9UPV0	CEP164
806	uniprot.Q9UPW0_ukb.OID30445_decode.NA	Q9UPW0	FOXJ3
807	uniprot.Q9UQV4_ukb.OID20638_decode.NA	Q9UQV4	LAMP3
808	uniprot.Q9Y258_ukb.OID20546_decode.9168_31	Q9Y258	CCL26
809	uniprot.Q9Y266_ukb.OID20623_decode.8887_21	Q9Y266	NUDC
810	uniprot.Q9Y2I7_ukb.OID30465_decode.NA	Q9Y2I7	PIKFYVE
811	uniprot.Q9Y2J8_ukb.OID20467_decode.NA	Q9Y2J8	PADI2
812	uniprot.Q9Y2X7_ukb.OID30533_decode.NA	Q9Y2X7	GIT1
813	uniprot.Q9Y3D3_ukb.OID30489_decode.NA	Q9Y3D3	MRPS16
814	uniprot.Q9Y3D6_ukb.OID20722_decode.17746_77	Q9Y3D6	FIS1
815	uniprot.Q9Y3P8_ukb.OID20462_decode.11194_6	Q9Y3P8	SIT1
816	uniprot.Q9Y478_ukb.OID20444_decode.NA	Q9Y478	PRKAB1
817	uniprot.Q9Y4C1_ukb.OID30426_decode.NA	Q9Y4C1	KDM3A
818	uniprot.Q9Y4D1_ukb.OID30664_decode.NA	Q9Y4D1	DAAM1
819	uniprot.Q9Y4X3_ukb.OID20121_decode.2192_63	Q9Y4X3	CCL27
820	uniprot.Q9Y5A7_ukb.OID20510_decode.NA	Q9Y5A7	NUB1
821	uniprot.Q9Y5Y7_ukb.OID30728_decode.3206_4	Q9Y5Y7	LYVE1
822	uniprot.Q9Y6K9_ukb.OID20544_decode.NA	Q9Y6K9	IKBKG
823	uniprot.Q9Y6N7_ukb.OID20734_decode.5740_17	Q9Y6N7	ROBO1
824	uniprot.Q9Y6Q6_ukb.OID20646_decode.NA	Q9Y6Q6	TNFRSF11A
825	uniprot.P02741_ukb.NA_decode.4337_49	P02741	CRP
826	uniprot.P06241_ukb.NA_decode.3813_3	P06241	FYN
827	uniprot.P08253_ukb.NA_decode.4160_49	P08253	MMP2
828	uniprot.P10966_ukb.NA_decode.9310_2	P10966	CD8B
829	uniprot.P17066_ukb.NA_decode.13672_3	P17066	HSPA6
830	uniprot.P50281_ukb.NA_decode.5002_76	P50281	MMP14
831	uniprot.P51512_ukb.NA_decode.5268_49	P51512	MMP16
832	uniprot.P51512_ukb.NA_decode.9719_145	P51512	MMP16
833	uniprot.Q13542_ukb.NA_decode.4184_43	Q13542	EIF4EBP2
834	uniprot.Q9GZP0_ukb.NA_decode.9341_1	Q9GZP0	PDGFD
835	uniprot.Q9GZP0_ukb.NA_decode.17140_57	Q9GZP0	PDGFD
836	uniprot.Q9UBN6_ukb.NA_decode.14121_24	Q9UBN6	TNFRSF10D
837	uniprot.Q9ULZ9_ukb.NA_decode.2838_53	Q9ULZ9	MMP17
838	uniprot.Q9Y2T1_ukb.NA_decode.8429_16	Q9Y2T1	AXIN2
839	uniprot.Q9Y2T1_ukb.NA_decode.12925_105	Q9Y2T1	AXIN2

## Sheet: ST4
Supplementary Table 4. Genetic correlation (rg) estimates from LD score regression analysis.
protein	p2	UniProt	INT_eGFRdiff	INT_eGFRdiff.mean	INT_eGFRdiff.pct.cr	INT_eGFRcys	INT_eGFRcr	INT_eGFRcc	INT_eGFRmean	INT_UACR	INT_UK_UCR	INT_UNA_UCR	INT_UNA_UK	INT_Urate	INT_Urea	p_Assay_unique	Cluster
FUOM	uniprot.A2VDF0_ukb.OID30626_decode.NA	A2VDF0	-0.1969	0.2072	-0.2072	-0.1707	-0.01293	-0.1271	-0.117	0.01516	-0.2345	-0.001069	0.148	0.2945	-0.01193	FUOM	cluster 2
PINLYP	uniprot.A6NC86_ukb.OID30651_decode.NA	A6NC86	-0.08243	0.0914	-0.0914	-0.1219	-0.0739	-0.1106	-0.1095	0.02158	-0.13	-0.01252	0.08769	0.1084	0.01277	PINLYP	cluster 3
ISM1	uniprot.B1AKI9_ukb.OID20538_decode.8355_80	B1AKI9	-0.1368	0.1495	-0.1495	-0.2328	-0.1419	-0.2153	-0.212	-0.01717	-0.138	-0.08334	0.01978	0.05152	0.03793	ISM1	cluster 2
DDX39A	uniprot.O00148_ukb.OID30494_decode.NA	O00148	0.1507	-0.1699	0.1699	0.1774	0.05927	0.1483	0.1326	-0.07379	0.1237	-0.02588	-0.1141	0.007078	-0.08116	DDX39A	cluster 5
CCL24	uniprot.O00175_ukb.OID20772_decode.4128_27	O00175	-0.108	0.1107	-0.1107	-0.1047	-0.02561	-0.08727	-0.08067	-0.05148	-0.05372	0.06882	0.1043	0.09283	0.1004	CCL24	cluster 3
LGALS9	uniprot.O00182_ukb.OID20781_decode.9197_4	O00182	-0.4772	0.4967	-0.4967	-0.6077	-0.2746	-0.5341	-0.5167	-0.1283	-0.2941	-0.00416	0.1914	0.3435	0.2388	LGALS9	cluster 6
TLR4	uniprot.O00206_ukb.OID30428_decode.11101_18	O00206	-0.03912	0.05168	-0.05168	-0.1007	-0.07991	-0.1108	-0.1061	0.1232	-0.1004	-0.07667	0.00113	0.00311	-0.04681	TLR4	cluster 4
TNFRSF10A	uniprot.O00220_ukb.OID20967_decode.4832_75	O00220	-0.4233	0.4414	-0.4414	-0.5056	-0.1884	-0.4302	-0.4132	-0.1175	-0.3837	0.02246	0.2848	0.3273	0.2114	TNFRSF10A	cluster 6
SIRPB1	uniprot.O00241_ukb.OID20739_decode.6247_9	O00241	-0.2418	0.2578	-0.2578	-0.4018	-0.2542	-0.383	-0.3769	-0.1096	-0.1249	-0.06122	0.02516	0.1085	0.167	SIRPB1	cluster 6
AGRP	uniprot.O00253_ukb.OID20658_decode.2813_11	O00253	-0.03646	0.04393	-0.04393	-0.1395	-0.1489	-0.1569	-0.1593	0.04436	-0.01826	0.02217	0.03948	0.1211	0.07715	AGRP	cluster 4
DFFA	uniprot.O00273_ukb.OID20620_decode.NA	O00273	-0.1542	0.1543	-0.1543	-0.03818	0.1212	0.02069	0.0291	0.06284	-0.1187	0.141	0.2025	0.1122	-0.02516	DFFA	cluster 3
TNFRSF11B	uniprot.O00300_ukb.OID20735_decode.8304_50	O00300	0.03249	-0.02961	0.02961	0.01458	-0.01534	0.006597	0.004203	0.06184	-0.06559	0.01026	0.05282	-0.0308	-0.06004	TNFRSF11B	cluster 3
MATN2	uniprot.O00339_ukb.OID20767_decode.3325_2	O00339	-0.006151	0.01359	-0.01359	-0.08401	-0.1034	-0.1007	-0.1017	0.01537	-0.05679	-0.01143	0.02639	-0.06077	0.02487	MATN2	cluster 4
QSOX1	uniprot.O00391_ukb.OID30729_decode.NA	O00391	-0.135	0.1436	-0.1436	-0.2145	-0.139	-0.206	-0.203	-0.0854	-0.153	-0.07673	0.03682	0.1029	0.05306	QSOX1	cluster 2
WASL	uniprot.O00401_ukb.OID30467_decode.NA	O00401	0.07319	-0.06423	0.06423	-0.02764	-0.1259	-0.06115	-0.06935	0.06199	-0.008927	-0.01972	-0.01235	-0.0122	-0.00213	WASL	cluster 4
AGRN	uniprot.O00468_ukb.OID20786_decode.15483_377	O00468	-0.3029	0.3196	-0.3196	-0.4133	-0.2087	-0.3702	-0.3608	-0.1252	-0.2821	0.0344	0.2172	0.3258	0.2146	AGRN	cluster 6
CCL21	uniprot.O00585_ukb.OID20686_decode.2516_57	O00585	-0.194	0.2011	-0.2011	-0.1995	-0.05338	-0.1623	-0.1539	0.06174	-0.08572	0.004634	0.05671	0.1137	0.05796	CCL21	cluster 2
FCN1	uniprot.O00602_ukb.OID30690_decode.15582_25	O00602	-0.2012	0.2065	-0.2065	-0.2148	-0.05373	-0.1761	-0.1663	-0.1001	-0.2946	0.01852	0.2215	0.2473	0.02454	FCN1	cluster 2
CCL22	uniprot.O00626_ukb.OID20765_decode.3508_78	O00626	-0.2935	0.3049	-0.3049	-0.3063	-0.08103	-0.2493	-0.237	-0.01645	-0.3017	0.05263	0.2486	0.2113	0.04909	CCL22	cluster 2
CXCL11	uniprot.O14625_ukb.OID21042_decode.3038_9	O14625	-0.1491	0.1516	-0.1516	-0.103	0.03652	-0.05692	-0.04969	0.07846	-0.01677	0.02308	0.02965	0.04692	-0.02121	CXCL11	cluster 3
SLC9A3R1	uniprot.O14745_ukb.OID30630_decode.NA	O14745	-0.1464	0.1502	-0.1502	-0.0874	0.0493	-0.0397	-0.03382	0.04176	-0.1051	0.09893	0.1597	0.1379	0.03521	SLC9A3R1	cluster 3
TNFRSF10B	uniprot.O14763_ukb.OID20981_decode.5534_49	O14763	-0.5402	0.573	-0.573	-0.7521	-0.408	-0.6902	-0.6703	-0.2589	-0.3851	-0.00963	0.2653	0.3689	0.2657	TNFRSF10B	cluster 6
TPP1	uniprot.O14773_ukb.OID20750_decode.17691_1	O14773	-0.215	0.2132	-0.2132	-0.09712	0.1215	-0.01891	-0.007773	0.1357	-0.07438	0.06526	0.1045	0.1233	-0.07749	TPP1	cluster 3
TNFSF11	uniprot.O14788_ukb.OID20592_decode.14061_48	O14788	-0.09123	0.09612	-0.09612	-0.1203	-0.06466	-0.1131	-0.1087	-0.03481	-0.1229	-0.1642	-0.05701	0.06433	0.04091	TNFSF11	cluster 4
APOL1	uniprot.O14791_ukb.OID30708_decode.11510_31	O14791	0.03003	-0.03152	0.03152	0.09874	0.09801	0.1075	0.1097	-0.01482	-0.06466	0.04036	0.08174	0.07659	-0.05182	APOL1	cluster 3
TNFRSF13B	uniprot.O14836_ukb.OID20702_decode.2704_74	O14836	-0.3552	0.3753	-0.3753	-0.5028	-0.2783	-0.46	-0.4494	-0.08779	-0.1884	-0.0596	0.07515	0.2188	0.2342	TNFRSF13B	cluster 6
BACH1	uniprot.O14867_ukb.OID20505_decode.12451_62	O14867	-0.2026	0.2028	-0.2028	-0.1063	0.08675	-0.04049	-0.02815	0.02511	-0.08891	0.09663	0.1412	0.1103	-0.01147	BACH1	cluster 3
WNT9A	uniprot.O14904_ukb.OID20460_decode.NA	O14904	-0.02476	0.04937	-0.04937	-0.4318	-0.548	-0.518	-0.5292	-0.0894	-0.1753	-0.2179	-0.06775	0.07177	0.2232	WNT9A	cluster 2
AXIN1	uniprot.O15169_ukb.OID20582_decode.NA	O15169	-0.09402	0.09486	-0.09486	0.0003201	0.1044	0.0418	0.04646	0.06892	-0.127	0.1347	0.2011	0.06842	-0.02848	AXIN1	cluster 3
CHAD	uniprot.O15335_ukb.OID30660_decode.13460_4	O15335	0.06711	-0.06062	0.06062	-0.1082	-0.2195	-0.1658	-0.1739	-0.0603	-0.06685	-0.09079	-0.03355	-0.07701	0.03764	CHAD	cluster 4
STX7	uniprot.O15400_ukb.OID30560_decode.8274_64	O15400	-0.1337	0.1409	-0.1409	-0.2477	-0.165	-0.2381	-0.2386	-0.03797	-0.1988	-0.01654	0.1163	0.134	0.09105	STX7	cluster 2
CCL25_1	uniprot.O15444_ukb.OID20674_decode.2705_5	O15444	-0.04862	0.05301	-0.05301	-0.1752	-0.1764	-0.1915	-0.1961	0.02176	-0.08396	0.1454	0.185	0.2616	0.2193	CCL25	cluster 2
TLR3	uniprot.O15455_ukb.OID20612_decode.16918_198	O15455	NA	NA	NA	NA	NA	NA	NA	NA	NA	NA	NA	NA	NA	TLR3	#N/A
ADAM12	uniprot.O43184_ukb.OID30491_decode.4420_7	O43184	-0.2574	0.2756	-0.2756	-0.359	-0.1993	-0.3331	-0.3257	-0.1284	-0.251	-0.1136	0.06736	0.2613	0.1163	ADAM12	cluster 6
SPINT2	uniprot.O43291_ukb.OID20720_decode.2843_13	O43291	-0.121	0.1323	-0.1323	-0.2377	-0.1691	-0.238	-0.2353	0.008051	-0.08762	-0.02379	0.04015	0.0423	0.09108	SPINT2	cluster 2
FGF16	uniprot.O43320_ukb.OID30535_decode.4393_3	O43320	-0.0138	0.02109	-0.02109	-0.04495	-0.01762	-0.03175	-0.03399	0.05619	-0.01949	-0.07976	-0.05592	0.1094	0.06009	FGF16	cluster 4
TPD52L2	uniprot.O43399_ukb.OID30609_decode.NA	O43399	-0.1408	0.1421	-0.1421	-0.05213	0.08716	-0.0005828	0.005973	0.0509	-0.1107	0.08797	0.1539	0.1126	0.0001872	TPD52L2	cluster 3
TGOLN2	uniprot.O43493_ukb.OID30691_decode.NA	O43493	-0.2639	0.2822	-0.2822	-0.588	-0.479	-0.6064	-0.6032	-0.283	-0.2548	-0.07682	0.1048	0.1387	0.2416	TGOLN2	cluster 6
TNFSF12	uniprot.O43508_ukb.OID20624_decode.5939_42	O43508	0.1076	-0.106	0.106	0.04597	-0.06014	0.007821	0.0006355	0.03623	0.04525	-0.07271	-0.09358	-0.1533	-0.0452	TNFSF12	cluster 4
BCL2L11	uniprot.O43521-2_ukb.OID20513_decode.NA	O43521-2	-0.1267	0.1347	-0.1347	-0.225	-0.1504	-0.2212	-0.2178	0.0385	-0.07401	0.01797	0.06197	0.06855	0.1106	BCL2L11	cluster 2
TNFSF14	uniprot.O43557_ukb.NA_decode.5355_69	O43557	-0.09892	0.09987	-0.09987	-0.02985	0.07279	-0.001373	0.004797	0.1094	-0.0129	-0.1285	-0.1034	0.08949	-0.00151	TNFSF14	cluster 3
LAT	uniprot.O43561_ukb.OID20640_decode.10551_7	O43561	-0.1139	0.12	-0.12	-0.05817	0.05372	-0.01605	-0.01055	-0.03766	-0.1722	0.009956	0.1269	0.104	0.04603	LAT	cluster 3
DENR	uniprot.O43583_ukb.OID30493_decode.19287_59	O43583	-0.02189	0.02241	-0.02241	-0.008731	0.02108	0.005519	0.004033	0.1315	-0.03124	0.06449	0.07182	0.06841	-0.01371	DENR	cluster 3
SPRY2	uniprot.O43597_ukb.OID20475_decode.NA	O43597	-0.1149	0.1177	-0.1177	-0.06773	0.03516	-0.03038	-0.02651	0.014	-0.1444	0.06201	0.1533	0.1061	0.013	SPRY2	cluster 3
DNPH1	uniprot.O43598_ukb.OID20744_decode.17785_11	O43598	-0.1753	0.1784	-0.1784	-0.08226	0.08724	-0.02232	-0.01202	0.0647	-0.07356	0.03741	0.06831	0.168	-0.03707	DNPH1	cluster 3
NCK2	uniprot.O43639_ukb.OID20683_decode.13615_60	O43639	-0.07015	0.07137	-0.07137	-0.006671	0.07657	0.03043	0.03251	0.06048	-0.04367	0.05292	0.07504	0.07655	0.005191	NCK2	cluster 3
ACTN4	uniprot.O43707_ukb.OID20435_decode.NA	O43707	NA	NA	NA	NA	NA	NA	NA	NA	NA	NA	NA	NA	NA	ACTN4	#N/A
ITM2A	uniprot.O43736_ukb.OID20504_decode.7765_15	O43736	-0.2427	0.2537	-0.2537	-0.3023	-0.1336	-0.2576	-0.2512	-0.08594	-0.1781	-0.0833	0.04453	0.2142	0.1692	ITM2A	cluster 2
CD5L	uniprot.O43866_ukb.OID30775_decode.3293_2	O43866	-0.1371	0.1461	-0.1461	-0.1764	-0.08128	-0.1575	-0.1516	-0.04139	-0.06883	-0.116	-0.05456	0.04198	0.005916	CD5L	cluster 2
VEGFD	uniprot.O43915_ukb.OID20662_decode.13098_93	O43915	0.189	-0.1879	0.1879	0.02808	-0.1847	-0.05481	-0.06563	-0.02538	0.03557	-0.09841	-0.103	-0.1529	0.01937	VEGFD	cluster 5
BNIP3L	uniprot.O60238_ukb.OID30525_decode.7835_2	O60238	-0.1332	0.1355	-0.1355	-0.1234	0.0006197	-0.0857	-0.08131	0.004488	-0.1282	0.07617	0.1538	0.0419	0.0111	BNIP3L	cluster 2
SUSD5	uniprot.O60279_ukb.OID30650_decode.NA	O60279	-0.02858	0.03993	-0.03993	-0.2458	-0.2886	-0.2884	-0.2928	-0.0767	-0.05705	-0.116	-0.06652	-0.0496	0.07072	SUSD5	cluster 2
PPL	uniprot.O60437_ukb.OID30564_decode.NA	O60437	-0.1877	0.2039	-0.2039	-0.412	-0.3303	-0.4169	-0.4169	-0.09693	-0.3042	-0.02299	0.1851	0.2772	0.16	PPL	cluster 6
EVI5	uniprot.O60447_ukb.OID30519_decode.NA	O60447	-0.08647	0.09	-0.09	-0.02339	0.06634	0.0129	0.01564	0.0357	-0.08894	0.1082	0.1606	0.06399	-0.01158	EVI5	cluster 3
LY75	uniprot.O60449_ukb.OID20580_decode.16620_26	O60449	-0.03201	0.03336	-0.03336	-0.02984	-0.008514	-0.02663	-0.02512	0.04654	-0.003326	0.02301	0.02646	-0.02523	-0.05043	LY75	cluster 3
NPHS1	uniprot.O60500_ukb.OID30540_decode.NA	O60500	0.0823	-0.09059	0.09059	0.3084	0.304	0.336	0.339	0.09575	0.03209	-0.04528	-0.05921	-0.009445	-0.2161	NPHS1	cluster 5
PSPN	uniprot.O60542_ukb.OID20511_decode.2696_87	O60542	-0.0838	0.08573	-0.08573	-0.05475	0.01957	-0.0338	-0.02861	-0.006217	-0.03822	0.1225	0.1399	0.07699	0.05011	PSPN	cluster 3
SPINK4	uniprot.O60575_ukb.OID20509_decode.19213_1	O60575	-0.2407	0.2544	-0.2544	-0.4023	-0.2647	-0.3869	-0.3814	-0.08226	-0.09039	0.1336	0.1854	0.2508	0.2823	SPINK4	cluster 2
SH2D1A	uniprot.O60880_ukb.OID20514_decode.4567_82	O60880	-0.1998	0.2071	-0.2071	-0.235	-0.08151	-0.191	-0.1861	0.003028	-0.1286	0.03798	0.1243	0.1754	0.03771	SH2D1A	cluster 2
DNAJA2	uniprot.O60884_ukb.OID20627_decode.11582_63	O60884	-0.07983	0.08247	-0.08247	-0.02778	0.06215	0.01001	0.01212	0.05426	-0.04187	0.05179	0.07198	0.1005	0.05442	DNAJA2	cluster 3
NBN	uniprot.O60934_ukb.OID20442_decode.NA	O60934	-0.2322	0.2314	-0.2314	-0.223	-0.0207	-0.1708	-0.1601	-0.01663	-0.1395	-0.01193	0.08264	0.1661	0.0688	NBN	cluster 2
ADAM23	uniprot.O75077_ukb.OID20651_decode.7049_2	O75077	0.09329	-0.0833	0.0833	-0.07286	-0.1972	-0.1295	-0.1391	-0.03435	-0.05981	-0.07127	-0.01597	-0.06437	0.0651	ADAM23	cluster 4
ADAMTS4	uniprot.O75173_ukb.OID30471_decode.2809_25	O75173	-0.1784	0.1878	-0.1878	-0.2306	-0.1106	-0.2127	-0.2071	0.03681	-0.2356	0.07243	0.2253	0.1432	0.1435	ADAMTS4	cluster 2
DNAJB6	uniprot.O75190_ukb.OID30613_decode.11606_22	O75190	-0.1009	0.1019	-0.1019	-0.01139	0.1081	0.03953	0.04356	0.1204	-0.09363	0.113	0.1618	0.1066	0.04054	DNAJB6	cluster 3
TBCA	uniprot.O75347_ukb.OID30616_decode.12501_10	O75347	-0.1373	0.1328	-0.1328	-0.006886	0.1458	0.05281	0.06214	0.09748	-0.06016	0.08629	0.1189	-0.01734	-0.03983	TBCA	cluster 3
PTP4A3	uniprot.O75365_ukb.OID30469_decode.19231_22	O75365	-0.2629	0.2798	-0.2798	-0.3016	-0.08826	-0.2472	-0.2374	-0.06269	-0.18	-0.05367	0.07507	0.2931	0.2041	PTP4A3	cluster 2
CRLF1	uniprot.O75462_ukb.OID20699_decode.14747_9	O75462	-0.02576	0.03882	-0.03882	-0.1587	-0.1777	-0.1808	-0.1827	-0.009352	-0.08916	-0.09938	-0.02443	0.1373	-0.02492	CRLF1	cluster 4
PSIP1	uniprot.O75475_ukb.OID20534_decode.17176_13	O75475	-0.2468	0.2554	-0.2554	-0.2609	-0.06406	-0.2125	-0.2022	0.03319	-0.1807	-0.03874	0.08681	0.2551	0.08579	PSIP1	cluster 2
SKAP2	uniprot.O75563_ukb.OID20761_decode.NA	O75563	-0.06105	0.06272	-0.06272	0.02044	0.096	0.05198	0.05564	0.08372	-0.1062	0.1263	0.1817	0.02332	-0.03543	SKAP2	cluster 3
PPM1B	uniprot.O75688_ukb.OID30548_decode.NA	O75688	-0.04048	0.045	-0.045	-0.09163	-0.06413	-0.08769	-0.09453	-0.002571	-0.004345	0.04771	0.05297	0.04933	0.0247	PPM1B	cluster 3
ATRN	uniprot.O75882-2_ukb.OID30735_decode.NA	O75882-2	-0.05062	0.05503	-0.05503	0.001916	0.05743	0.02872	0.03054	-0.007606	-0.1205	0.01124	0.09653	0.1944	-0.03333	ATRN	cluster 3
TNFSF13	uniprot.O75888_ukb.OID20733_decode.NA	O75888	-0.1444	0.1533	-0.1533	-0.2383	-0.145	-0.2253	-0.2218	0.03811	-0.1188	0.002319	0.08217	0.01866	0.04295	TNFSF13	cluster 2
NCR1	uniprot.O76036_ukb.OID20566_decode.8360_169	O76036	-0.2286	0.2497	-0.2497	-0.4318	-0.3165	-0.4288	-0.4265	-0.05998	-0.135	-0.03851	0.05293	0.1096	0.1234	NCR1	cluster 6
SCGN	uniprot.O76038_ukb.OID20457_decode.15305_7	O76038	0.09958	-0.09621	0.09621	-0.04507	-0.165	-0.09853	-0.1071	-0.06916	0.03871	0.0353	0.004174	-0.03978	0.1308	SCGN	cluster 4
PDE5A	uniprot.O76074_ukb.OID30584_decode.16805_5	O76074	-0.06199	0.06185	-0.06185	-0.01604	0.04606	0.008119	0.01082	0.04058	-0.01469	0.04001	0.04429	0.05779	-0.01276	PDE5A	cluster 3
CST7	uniprot.O76096_ukb.OID20704_decode.3302_58	O76096	-0.1408	0.1467	-0.1467	-0.1515	-0.04547	-0.1223	-0.115	0.005048	-0.1565	0.01041	0.1171	0.1287	0.01586	CST7	cluster 2
NFASC	uniprot.O94856_ukb.OID20634_decode.7179_69	O94856	-0.1086	0.1124	-0.1124	-0.05846	0.04287	-0.0229	-0.0179	0.07182	-0.02727	0.0196	0.03268	0.1633	0.02948	NFASC	cluster 3
NFAT5	uniprot.O94916_ukb.OID30522_decode.NA	O94916	0.0001019	-0.001113	0.001113	0.03699	0.0475	0.04162	0.04101	0.01848	-0.0876	0.08514	0.1417	-0.001429	0.01741	NFAT5	cluster 3
HEXIM1	uniprot.O94992_ukb.OID20589_decode.15596_7	O94992	-0.1291	0.1324	-0.1324	-0.0785	0.04335	-0.03715	-0.03094	0.06246	-0.08982	0.06398	0.1104	0.1058	4.78e-05	HEXIM1	cluster 3
NXPH3	uniprot.O95157_ukb.OID30565_decode.6054_6	O95157	0.03112	-0.02214	0.02214	-0.1422	-0.2198	-0.1817	-0.1918	-0.1114	-0.04029	-0.09768	-0.06103	0.1034	0.1336	NXPH3	cluster 4
TNFAIP8	uniprot.O95379_ukb.OID20433_decode.12563_2	O95379	-0.05474	0.05247	-0.05247	0.01216	0.09699	0.05231	0.05558	0.06343	-0.0429	-0.01357	0.008542	0.06398	0.008357	TNFAIP8	cluster 3
BMP10	uniprot.O95393_ukb.OID30575_decode.3587_53	O95393	0.1782	-0.1761	0.1761	0.1208	-0.0406	0.06605	0.05641	0.04896	0.1228	-0.1058	-0.1803	-0.179	-0.06821	BMP10	cluster 5
BAG4	uniprot.O95429_ukb.OID30474_decode.12844_10	O95429	-0.1252	0.1259	-0.1259	-0.06164	0.06892	-0.01665	-0.01266	0.03871	-0.008958	0.06875	0.06304	0.09995	0.06426	BAG4	cluster 3
VNN1	uniprot.O95497_ukb.OID30711_decode.NA	O95497	-0.2067	0.211	-0.211	-0.1098	0.08346	-0.04435	-0.03297	-0.02485	-0.1342	0.09124	0.1751	0.302	-0.02609	VNN1	cluster 2
FSTL3	uniprot.O95633_ukb.OID20782_decode.3438_10	O95633	-0.3513	0.3789	-0.3789	-0.647	-0.4644	-0.6369	-0.63	-0.2093	-0.276	-0.09704	0.1017	0.2477	0.2094	FSTL3	cluster 6
NFATC1	uniprot.O95644_ukb.OID20545_decode.14286_2	O95644	-0.15	0.1463	-0.1463	-0.04145	0.1053	0.01241	0.02161	-0.02113	-0.1023	0.1718	0.2195	0.1329	-0.04051	NFATC1	cluster 3
CXCL14	uniprot.O95715_ukb.OID20458_decode.5730_60	O95715	-0.2246	0.231	-0.231	-0.3311	-0.1995	-0.3104	-0.3029	0.008662	-0.1412	0.1624	0.2506	0.1832	0.2778	CXCL14	cluster 2
FGF19	uniprot.O95750_ukb.OID20715_decode.13724_27	O95750	0.0802	-0.08102	0.08102	0.02881	-0.05504	-0.008829	-0.0114	0.01377	0.09958	-0.01835	-0.07809	-0.06151	0.06786	FGF19	cluster 4
IL33	uniprot.O95760_ukb.OID20428_decode.NA	O95760	-0.03593	0.05014	-0.05014	-0.2322	-0.2462	-0.2393	-0.2447	0.0122	-0.04872	0.02816	0.04986	0.01556	0.08336	IL33	cluster 2
LATS1	uniprot.O95835_ukb.OID30523_decode.NA	O95835	-0.1537	0.156	-0.156	-0.06681	0.08404	-0.01022	-0.004099	0.05185	-0.1044	0.09851	0.1625	0.1835	0.02213	LATS1	cluster 3
MPIG6B_1	uniprot.O95866_ukb.OID20779_decode.8659_68	O95866	-0.1027	0.1031	-0.1031	0.004792	0.1206	0.04782	0.05678	0.004868	-0.1296	0.05498	0.1322	0.01192	-0.02202	MPIG6B	cluster 3
CD160	uniprot.O95971_ukb.OID20647_decode.17677_47	O95971	-0.3102	0.3233	-0.3233	-0.4515	-0.2613	-0.4178	-0.4087	-0.1496	-0.1459	-0.07137	0.03295	0.1581	0.1831	CD160	cluster 6
IL18BP	uniprot.O95998_ukb.OID20348_decode.3073_51	O95998	-0.2755	0.2947	-0.2947	-0.4685	-0.3137	-0.4543	-0.447	-0.05972	-0.1712	-0.04367	0.07532	0.1354	0.1098	IL18BP	cluster 6
MOCS2	uniprot.O96007_ukb.OID30638_decode.NA	O96007	-0.1048	0.1072	-0.1072	-0.08069	0.005036	-0.05642	-0.05124	0.03085	-0.1111	0.04724	0.1194	0.1115	-0.001138	MOCS2	cluster 3
ADH1B	uniprot.P00325_ukb.OID30612_decode.9834_62	P00325	-0.1401	0.1506	-0.1506	-0.1503	-0.05179	-0.1266	-0.1211	-0.04405	-0.2664	0.009037	0.1856	0.2598	0.01198	ADH1B	cluster 2
GSR	uniprot.P00390_ukb.OID30700_decode.19273_3	P00390	0.0768	-0.07692	0.07692	0.04988	-0.01323	0.02663	0.02383	0.01447	-0.001467	0.01021	-0.001037	0.02228	0.05488	GSR	cluster 4
F2	uniprot.P00734_ukb.OID30723_decode.4157_2	P00734	0.1544	-0.1562	0.1562	0.2345	0.1436	0.2233	0.2187	0.06935	0.01667	0.1115	0.08444	0.01281	-0.0451	F2	cluster 5
C1R	uniprot.P00736_ukb.OID30753_decode.3285_23	P00736	-0.117	0.1181	-0.1181	-0.08881	0.01398	-0.0568	-0.05063	-0.2178	-0.3014	-0.01649	0.2013	0.1361	0.04589	C1R	cluster 2
F10	uniprot.P00742_ukb.OID30684_decode.3077_66	P00742	-0.002493	-0.00166	0.00166	0.01825	0.02975	0.02539	0.02433	0.02038	-0.08311	0.09397	0.1363	0.1827	0.01139	F10	cluster 3
CFD	uniprot.P00746_ukb.OID30738_decode.2946_52	P00746	-0.3789	0.4049	-0.4049	-0.6843	-0.4849	-0.6695	-0.6615	-0.2557	-0.2535	-0.07915	0.106	0.2508	0.2721	CFD	cluster 6
PLG_1	uniprot.P00747_ukb.OID30785_decode.4150_75	P00747	-0.1385	0.1342	-0.1342	-0.0206	0.1283	0.03475	0.04615	-0.008195	-0.09418	0.05789	0.1131	0.1172	-0.009981	PLG	cluster 3
F12	uniprot.P00748_ukb.OID30739_decode.NA	P00748	-0.0907	0.0922	-0.0922	-0.02398	0.07706	0.01489	0.02126	-0.03243	-0.07418	0.06884	0.117	0.1837	0.05131	F12	cluster 3
PLAU	uniprot.P00749_ukb.NA_decode.4158_54	P00749	0.04601	-0.04639	0.04639	0.0153	-0.03754	-0.004727	-0.004657	0.005948	0.1202	-0.02238	-0.1032	-0.1037	-0.05079	PLAU	cluster 4
CFB	uniprot.P00751_ukb.OID30755_decode.4129_72	P00751	-0.1693	0.1692	-0.1692	-0.0735	0.09882	-0.01483	-0.003075	-0.03073	-0.1839	0.05819	0.1778	0.2533	0.0214	CFB	cluster 2
ADA	uniprot.P00813_ukb.OID20645_decode.NA	P00813	-0.1698	0.1794	-0.1794	-0.2439	-0.1319	-0.2203	-0.2153	0.01116	-0.1259	0.09073	0.1715	0.2345	0.069	ADA	cluster 2
SERPINC1	uniprot.P01008_ukb.OID30789_decode.3344_60	P01008	0.2173	-0.2309	0.2309	0.2476	0.0866	0.2033	0.1951	0.06005	0.05459	0.06105	0.02041	-0.15	-0.06118	SERPINC1	cluster 5
SERPINA1	uniprot.P01009_ukb.OID30750_decode.3580_25	P01009	0.0629	-0.06871	0.06871	0.1109	0.07099	0.1017	0.1016	0.05707	0.05094	-0.04109	-0.06855	-0.2112	-0.1574	SERPINA1	cluster 5
SERPINA3_1	uniprot.P01011_ukb.OID30786_decode.4153_11	P01011	-0.1398	0.1307	-0.1307	-0.09627	0.03552	-0.06375	-0.05364	0.1158	-0.1904	0.03165	0.1558	0.05187	-0.09312	SERPINA3	cluster 3
AGT	uniprot.P01019_ukb.OID30709_decode.3484_60	P01019	0.131	-0.1368	0.1368	0.1104	0.01352	0.08214	0.07462	0.07711	0.1089	0.1068	0.02347	0.05092	0.0009089	AGT	cluster 5
C3	uniprot.P01024_ukb.OID30776_decode.2683_1	P01024	-0.3081	0.3151	-0.3151	-0.223	0.06068	-0.1313	-0.1171	-0.1272	-0.3299	0.06435	0.2894	0.3613	0.06333	C3	cluster 2
C5	uniprot.P01031_ukb.OID30744_decode.2381_52	P01031	-0.08317	0.08299	-0.08299	-0.02896	0.06193	-0.002091	0.006831	-0.01417	-0.1314	0.04407	0.1298	0.178	0.01974	C5	cluster 3
CST1	uniprot.P01037_ukb.OID30581_decode.5459_33	P01037	0.04845	-0.04323	0.04323	-0.07397	-0.1559	-0.1142	-0.1205	-0.0377	0.0214	-0.09043	-0.09329	-0.05132	0.03391	CST1	cluster 4
PDGFB	uniprot.P01127_ukb.OID20741_decode.4149_8	P01127	-0.06785	0.06895	-0.06895	-0.02753	0.04016	-0.006684	-0.0032	0.02212	-0.07779	-0.01371	0.04059	0.01294	-0.01918	PDGFB	cluster 3
EGF	uniprot.P01133_ukb.OID20698_decode.5509_7	P01133	-0.02232	0.02158	-0.02158	0.04034	0.08231	0.06095	0.0629	0.06043	-0.04614	0.02942	0.05943	0.0005967	-0.03389	EGF	cluster 3
TGFA	uniprot.P01135_ukb.OID20600_decode.NA	P01135	-0.3836	0.3986	-0.3986	-0.4547	-0.1734	-0.3934	-0.3774	-0.05261	-0.2856	0.08635	0.2647	0.3235	0.1928	TGFA	cluster 6
TGFB1	uniprot.P01137_ukb.OID20621_decode.2333_72	P01137	-0.2222	0.2294	-0.2294	-0.2246	-0.04513	-0.1779	-0.1693	0.001998	-0.09655	0.08565	0.1434	0.1387	0.02188	TGFB1	cluster 2
NGF	uniprot.P01138_ukb.OID20920_decode.5801_72	P01138	0.04694	-0.04754	0.04754	0.09291	0.06648	0.08549	0.08741	0.00621	-0.1066	0.03178	0.1206	-0.1206	-0.05746	NGF	cluster 4
PENK	uniprot.P01210_ukb.OID30666_decode.9076_25	P01210	-0.1462	0.1628	-0.1628	-0.4262	-0.4055	-0.4595	-0.4627	-0.179	-0.2025	-0.03082	0.1184	0.1812	0.2364	PENK	cluster 6
LTA	uniprot.P01374_ukb.OID20586_decode.4703_87	P01374	-0.2453	0.2537	-0.2537	-0.2261	-0.03401	-0.1694	-0.1604	0.03892	-0.1104	-0.006908	0.06917	0.1068	-0.05329	LTA	cluster 2
TNF	uniprot.P01375_ukb.OID20074_decode.5936_53	P01375	-0.4137	0.4305	-0.4305	-0.5144	-0.2227	-0.4479	-0.4352	-0.1026	-0.2864	-0.02347	0.1719	0.2563	0.1814	TNF	cluster 6
IFNG	uniprot.P01579_ukb.OID20495_decode.15346_31	P01579	-0.2618	0.2605	-0.2605	-0.1927	0.03538	-0.1147	-0.1069	0.08572	-0.02152	0.1329	0.1252	0.2201	0.107	IFNG	cluster 2
IL1A	uniprot.P01583_ukb.OID20488_decode.4851_25	P01583	NA	NA	NA	NA	NA	NA	NA	NA	NA	NA	NA	NA	NA	IL1A	#N/A
IL1B	uniprot.P01584_ukb.OID20427_decode.3037_62	P01584	-0.2997	0.3026	-0.3026	-0.1722	0.1082	-0.07649	-0.06632	-0.2275	-0.4189	-0.0002223	0.2943	0.07639	-0.03193	IL1B	cluster 2
EPO	uniprot.P01588_ukb.OID20522_decode.5813_58	P01588	0.02172	-0.01595	0.01595	-0.03318	-0.05829	-0.04457	-0.04645	0.008459	-0.0505	-0.02948	0.009218	0.02077	0.009942	EPO	cluster 4
JCHAIN	uniprot.P01591_ukb.OID20494_decode.15306_20	P01591	-0.04439	0.05326	-0.05326	-0.1003	-0.08752	-0.1036	-0.1026	-0.09354	-0.1281	-0.1723	-0.05748	0.0187	0.04731	JCHAIN	cluster 4
CD4	uniprot.P01730_ukb.OID20584_decode.3143_3	P01730	-0.4647	0.4856	-0.4856	-0.5473	-0.2053	-0.4644	-0.4481	-0.01486	-0.2094	0.01678	0.1613	0.3455	0.217	CD4	cluster 6
HLA-DRA	uniprot.P01903_ukb.OID20520_decode.NA	P01903	-0.1	0.1097	-0.1097	-0.1518	-0.1027	-0.1442	-0.1415	-0.06094	-0.08292	-0.1063	-0.04903	0.04564	-0.005118	HLA-DRA	cluster 2
APOA1	uniprot.P02647_ukb.OID30769_decode.2750_3	P02647	0.2158	-0.226	0.226	0.2825	0.1257	0.2486	0.2412	0.09007	0.1726	0.08907	-0.03822	-0.1175	-0.0777	APOA1	cluster 5
APOE	uniprot.P02649_ukb.OID30727_decode.2418_55	P02649	NA	NA	NA	NA	NA	NA	NA	NA	NA	NA	NA	NA	NA	APOE	#N/A
APOA2	uniprot.P02652_ukb.OID30686_decode.7127_3	P02652	-0.04212	0.04567	-0.04567	-0.08608	-0.08287	-0.09354	-0.09456	0.02696	0.07769	0.03304	-0.02929	-0.06916	-0.0299	APOA2	cluster 4
APOC1	uniprot.P02654_ukb.OID30749_decode.15364_101	P02654	0.2718	-0.277	0.277	0.3024	0.08074	0.2425	0.2334	0.04507	0.214	-0.02843	-0.1596	-0.2554	-0.1252	APOC1	cluster 5
FGA	uniprot.P02671_ukb.OID30788_decode.NA	P02671	-0.1669	0.1712	-0.1712	-0.182	-0.05039	-0.1493	-0.1396	-0.05719	-0.1943	-0.07036	0.06659	0.1761	0.06227	FGA	cluster 2
CRP	uniprot.P02741_ukb.NA_decode.4337_49	P02741	-0.1588	0.1571	-0.1571	-0.07885	0.07375	-0.02749	-0.01686	-0.0236	-0.07701	0.003624	0.0615	0.2054	0.01032	CRP	cluster 3
APCS	uniprot.P02743_ukb.OID30778_decode.2474_54	P02743	-0.182	0.1811	-0.1811	-0.1209	0.05138	-0.06796	-0.05672	-0.04264	-0.1849	0.06383	0.1852	0.2383	0.07557	APCS	cluster 2
C1QA	uniprot.P02745_ukb.OID20654_decode.NA	P02745	-0.2009	0.2093	-0.2093	-0.2521	-0.1068	-0.2119	-0.2057	0.06351	-0.02772	0.01007	0.03198	0.02171	0.009301	C1QA	cluster 2
C9	uniprot.P02748_ukb.OID30698_decode.3060_43	P02748	-0.1565	0.1524	-0.1524	-0.0963	0.04961	-0.05609	-0.0435	-0.02881	-0.0672	-0.06383	-0.01062	-0.05704	-0.01482	C9	cluster 3
LRG1	uniprot.P02750_ukb.OID30751_decode.NA	P02750	-0.3915	0.3932	-0.3932	-0.4101	-0.0811	-0.3284	-0.313	0.02049	-0.2038	-0.008426	0.12	0.09769	0.01827	LRG1	cluster 2
FN1_1	uniprot.P02751_ukb.OID30787_decode.3435_53	P02751	-0.1156	0.1172	-0.1172	-0.05629	0.05612	-0.01594	-0.006791	-0.07626	-0.1899	-0.07137	0.06738	0.1027	0.00838	FN1	cluster 2
ORM1	uniprot.P02763_ukb.OID30768_decode.NA	P02763	-0.2468	0.2534	-0.2534	-0.236	-0.02945	-0.1849	-0.1725	-0.07129	-0.2738	0.04764	0.2324	0.2553	0.06334	ORM1	cluster 2
AHSG	uniprot.P02765_ukb.OID30706_decode.3581_53	P02765	-0.08817	0.1047	-0.1047	-0.1936	-0.1588	-0.1916	-0.1957	0.0239	-0.1555	-0.0392	0.05713	0.2175	0.04774	AHSG	cluster 2
TTR	uniprot.P02766_ukb.OID30782_decode.NA	P02766	0.0687	-0.07113	0.07113	0.0261	-0.03975	0.003215	-0.001881	0.104	0.08371	0.03625	-0.0194	0.1531	0.04461	TTR	cluster 4
GC	uniprot.P02774_ukb.OID30780_decode.15589_1	P02774	0.1105	-0.1195	0.1195	0.1359	0.05779	0.1181	0.1142	0.1012	0.0192	0.09614	0.06933	-0.08191	-0.04088	GC	cluster 5
PPBP_1	uniprot.P02775_ukb.OID30761_decode.17165_1	P02775	-0.09744	0.09666	-0.09666	-0.03935	0.06219	-0.004654	0.0008045	0.04677	-0.05567	-0.01325	0.02612	0.02227	-0.002963	PPBP	cluster 3
PF4	uniprot.P02776_ukb.OID30764_decode.2697_7	P02776	-0.06511	0.06603	-0.06603	-0.03242	0.03723	-0.01157	-0.006994	0.02522	-0.07732	-0.04678	0.01244	0.0006511	0.0033	PF4	cluster 3
CXCL10	uniprot.P02778_ukb.OID20697_decode.4141_79	P02778	-0.2453	0.2558	-0.2558	-0.2535	-0.0638	-0.1996	-0.19	-0.0116	-0.1151	-0.01426	0.06477	0.1397	-0.004633	CXCL10	cluster 2
TF	uniprot.P02787_ukb.OID30783_decode.4162_54	P02787	0.1079	-0.1138	0.1138	0.159	0.08635	0.1459	0.1425	0.02542	-0.01371	0.006661	0.02756	-0.01635	-0.114	TF	cluster 5
ESR1	uniprot.P03372_ukb.OID30434_decode.NA	P03372	0.02704	-0.0178	0.0178	-0.01509	-0.05426	-0.02568	-0.03009	0.07185	-0.03891	-0.03396	-0.01204	-0.03496	-0.02515	ESR1	cluster 4
F11	uniprot.P03951_ukb.OID30773_decode.2190_55	P03951	0.06451	-0.06673	0.06673	0.05911	0.01696	0.04945	0.04646	0.04528	-0.03561	0.2182	0.2088	0.265	0.2418	F11	cluster 2
KLKB1	uniprot.P03952_ukb.OID30760_decode.4152_58	P03952	0.1352	-0.1458	0.1458	0.2254	0.165	0.2261	0.2211	0.02233	-0.01498	0.2188	0.2132	0.1497	0.05133	KLKB1	cluster 5
MMP1	uniprot.P03956_ukb.OID20672_decode.4924_32	P03956	-0.06698	0.06743	-0.06743	-0.06448	-0.01245	-0.05079	-0.04867	0.02727	-0.04711	0.002831	0.03683	0.042	-0.01648	MMP1	cluster 3
CAT	uniprot.P04040_ukb.OID30712_decode.3488_64	P04040	-0.01715	0.0169	-0.0169	-0.008106	0.00579	0.0006793	0.00256	-0.05313	-0.1243	-0.09925	-0.008021	0.04346	0.02247	CAT	cluster 4
ANXA1	uniprot.P04083_ukb.OID30617_decode.4960_72	P04083	-0.1269	0.127	-0.127	-0.1839	-0.08367	-0.1677	-0.1659	-0.03349	-0.1898	-0.1017	0.03695	0.1856	0.07683	ANXA1	cluster 2
PDGFA	uniprot.P04085_ukb.OID20313_decode.4499_21	P04085	-0.07423	0.07556	-0.07556	-0.04407	0.02879	-0.0227	-0.01882	0.0312	-0.05727	-0.01874	0.02301	0.01156	-0.02535	PDGFA	cluster 3
RLN2	uniprot.P04090_ukb.OID30601_decode.6621_10	P04090	-0.1949	0.204	-0.204	-0.3473	-0.2271	-0.3396	-0.3343	-0.03872	-0.2065	0.06154	0.1932	0.2037	0.1364	RLN2	cluster 2
APOB	uniprot.P04114_ukb.OID30673_decode.2797_56	P04114	NA	NA	NA	NA	NA	NA	NA	NA	NA	NA	NA	NA	NA	APOB	#N/A
LCAT	uniprot.P04180_ukb.OID30677_decode.15413_3	P04180	-0.141	0.1394	-0.1394	-0.06137	0.08168	-0.009707	-0.001871	-0.05036	-0.1687	0.09184	0.1983	0.2269	0.04499	LCAT	cluster 3
HRG	uniprot.P04196_ukb.OID30770_decode.4996_66	P04196	-0.0971	0.09311	-0.09311	-0.07599	0.0232	-0.04143	-0.03823	0.03705	-0.01365	0.0263	0.02239	0.1863	0.02432	HRG	cluster 3
A1BG	uniprot.P04217_ukb.OID30771_decode.16561_9	P04217	-0.1156	0.1074	-0.1074	0.02391	0.1644	0.08037	0.08877	-0.0005129	-0.121	0.1014	0.1689	0.08914	-0.07862	A1BG	cluster 3
SHBG	uniprot.P04278_ukb.OID30685_decode.4929_55	P04278	0.1057	-0.1115	0.1115	0.1246	0.0431	0.1056	0.1009	0.02873	0.1148	-0.03092	-0.1042	-0.3054	-0.1004	SHBG	cluster 5
GAPDH	uniprot.P04406_ukb.OID30600_decode.3848_14	P04406	-0.1512	0.1478	-0.1478	-0.06478	0.08376	-0.01298	-0.003159	0.09578	-0.1329	0.06244	0.1424	0.09866	-0.02036	GAPDH	cluster 3
APOD	uniprot.P05090_ukb.OID30746_decode.4712_28	P05090	0.1524	-0.1562	0.1562	0.1108	-0.02998	0.0707	0.06416	0.07515	0.1626	-0.007325	-0.1179	-0.195	-0.02317	APOD	cluster 5
IL4	uniprot.P05112_ukb.OID20426_decode.2906_55	P05112	0.1135	-0.1285	0.1285	0.2633	0.2493	0.2887	0.2873	-0.149	0.02186	-0.07994	-0.06912	-0.2192	-0.2563	IL4	cluster 5
IL5	uniprot.P05113_ukb.OID20472_decode.11071_1	P05113	-0.007806	0.006077	-0.006077	0.0315	0.04497	0.0458	0.05317	-0.03189	-0.02415	-0.03625	0.002795	-0.06172	-0.05792	IL5	cluster 3
SERPINA5	uniprot.P05154_ukb.OID30763_decode.3389_7	P05154	-0.1249	0.1311	-0.1311	-0.1802	-0.1008	-0.1672	-0.1604	-0.1886	-0.1603	-0.03271	0.07506	0.3008	0.1997	SERPINA5	cluster 2
SERPING1	uniprot.P05155_ukb.OID30777_decode.4479_14	P05155	0.02686	-0.03178	0.03178	0.05211	0.04178	0.04923	0.05067	0.03251	0.02329	0.08515	0.05803	-0.01115	0.05833	SERPING1	cluster 3
CFI	uniprot.P05156_ukb.OID30772_decode.2567_5	P05156	-0.219	0.2192	-0.2192	-0.1112	0.09962	-0.0423	-0.02841	-0.04569	-0.2317	0.06539	0.2134	0.2726	0.03548	CFI	cluster 2
F13B	uniprot.P05160_ukb.OID30781_decode.5658_64	P05160	-0.02084	0.02417	-0.02417	-0.08775	-0.09352	-0.1007	-0.1003	-0.05906	-0.04785	-0.02298	0.01389	0.1018	0.1056	F13B	cluster 4
IL6	uniprot.P05231_ukb.OID20101_decode.4673_13	P05231	-0.3371	0.3468	-0.3468	-0.289	-9.62e-06	-0.2071	-0.188	-0.03203	-0.3353	0.02697	0.2511	0.2436	-0.009571	IL6	cluster 2
ICAM1	uniprot.P05362_ukb.OID20411_decode.4342_10	P05362	-0.2896	0.2996	-0.2996	-0.2694	-0.02634	-0.2049	-0.1897	0.04005	-0.1598	0.0445	0.138	0.2093	-0.1051	ICAM1	cluster 2
JUN	uniprot.P05412_ukb.OID20424_decode.10356_21	P05412	-0.2693	0.2781	-0.2781	-0.397	-0.2136	-0.3621	-0.3518	-0.0214	-0.2343	0.1139	0.2547	0.1675	0.1511	JUN	cluster 2
CLEC3B	uniprot.P05452_ukb.OID30756_decode.5701_81	P05452	0.02395	-0.02102	0.02102	-0.064	-0.1105	-0.08816	-0.09104	-0.04833	0.01103	-0.02674	-0.03406	-0.1174	0.02319	CLEC3B	cluster 4
SERPINA7	uniprot.P05543_ukb.OID30724_decode.2706_69	P05543	-0.1124	0.1122	-0.1122	-0.05268	0.05469	-0.01639	-0.008045	-0.0207	-0.1171	0.007751	0.08809	0.01267	-0.05599	SERPINA7	cluster 3
SERPIND1	uniprot.P05546_ukb.OID30767_decode.3316_58	P05546	-0.1369	0.1339	-0.1339	-0.05386	0.08507	-0.007794	0.0009569	-0.008662	-0.1348	0.1439	0.216	0.2142	0.03054	SERPIND1	cluster 3
CD5_1	uniprot.P06127_ukb.OID21449_decode.5596_75	P06127	-0.2405	0.25	-0.25	-0.3135	-0.144	-0.2767	-0.2694	-0.005382	-0.1448	0.06091	0.1558	0.1324	0.04656	CD5	cluster 2
UROD	uniprot.P06132_ukb.OID30603_decode.19289_29	P06132	-0.06317	0.06329	-0.06329	-0.0282	0.03676	-0.003201	-0.002093	0.05702	-0.07945	0.02292	0.07266	0.0594	-0.03347	UROD	cluster 3
INSR	uniprot.P06213_ukb.OID30566_decode.3448_13	P06213	-0.04528	0.04877	-0.04877	-0.05352	-0.02936	-0.05027	-0.05209	-0.005259	0.07075	0.02344	-0.01676	-0.04592	-0.02869	INSR	cluster 4
FYN	uniprot.P06241_ukb.NA_decode.3813_3	P06241	-0.01313	0.02098	-0.02098	-0.08442	-0.08297	-0.0811	-0.08621	0.003357	-0.04001	-0.01945	0.0002044	0.02351	0.0502	FYN	cluster 4
BCHE	uniprot.P06276_ukb.OID30717_decode.15514_26	P06276	-0.05854	0.06074	-0.06074	-0.01704	0.04261	0.004684	0.009604	-0.02529	-0.1494	0.05415	0.1492	0.1649	0.01634	BCHE	cluster 3
GLA	uniprot.P06280_ukb.OID30594_decode.15588_17	P06280	-0.2516	0.2551	-0.2551	-0.1011	0.1488	-0.01332	0.002447	0.03243	-0.123	0.01269	0.09427	0.3022	-0.07392	GLA	cluster 2
GSN_1	uniprot.P06396_ukb.OID30714_decode.4775_34	P06396	0.1525	-0.1442	0.1442	-0.08944	-0.2847	-0.1781	-0.1911	-0.05646	0.001631	-0.1279	-0.1151	-0.1406	0.1166	GSN	cluster 4
PGR	uniprot.P06401_ukb.OID30460_decode.15693_9	P06401	-0.1637	0.1746	-0.1746	-0.1056	0.04564	-0.0456	-0.038	0.1675	0.09187	0.00448	-0.06462	0.14	0.0719	PGR	cluster 3
APOA4	uniprot.P06727_ukb.OID30733_decode.17685_9	P06727	0.02778	-0.01791	0.01791	-0.175	-0.2602	-0.2255	-0.2335	-0.02343	0.03405	0.04879	0.02512	0.01651	0.1779	APOA4	cluster 4
EIF4E	uniprot.P06730_ukb.OID30557_decode.19263_147	P06730	-0.05418	0.05308	-0.05308	0.04318	0.1176	0.07993	0.08245	0.03788	-0.04693	0.02195	0.05337	0.04331	-0.04897	EIF4E	cluster 3
GPI	uniprot.P06744_ukb.OID30680_decode.4272_46	P06744	-0.07866	0.07657	-0.07657	0.01664	0.1215	0.06126	0.06492	0.1056	-0.06435	0.08947	0.1153	0.103	-0.01276	GPI	cluster 3
FABP1	uniprot.P07148_ukb.OID20778_decode.11516_7	P07148	-0.3215	0.3379	-0.3379	-0.4725	-0.2659	-0.4333	-0.4254	-0.1122	-0.2556	0.06861	0.2258	0.373	0.2157	FABP1	cluster 6
PROS1	uniprot.P07225_ukb.OID30737_decode.2700_56	P07225	0.04951	-0.04901	0.04901	0.02709	-0.009398	0.01446	0.01322	0.00851	-0.08525	0.07781	0.122	0.1968	0.05243	PROS1	cluster 3
ASGR2	uniprot.P07307_ukb.OID30679_decode.9474_22	P07307	-0.3207	0.3411	-0.3411	-0.5207	-0.3166	-0.4905	-0.4825	-0.195	-0.3705	-0.1099	0.1454	0.1705	0.1136	ASGR2	cluster 6
ACYP1	uniprot.P07311_ukb.OID30642_decode.NA	P07311	-0.1317	0.1333	-0.1333	-0.08984	0.0279	-0.05019	-0.04497	0.001778	-0.08498	0.001811	0.05735	0.0898	0.01509	ACYP1	cluster 3
CSF1R	uniprot.P07333_ukb.OID30681_decode.13682_47	P07333	-0.1536	0.1626	-0.1626	-0.1566	-0.03818	-0.1239	-0.1171	0.03652	-0.02897	-0.06547	-0.04012	0.06173	-0.01422	CSF1R	cluster 2
C8B	uniprot.P07358_ukb.OID30719_decode.NA	P07358	-0.08103	0.07687	-0.07687	-0.02879	0.07673	0.006396	0.01261	0.04082	-0.03386	-0.03684	-0.002022	0.1712	0.09265	C8B	cluster 3
RNASE1	uniprot.P07998_ukb.OID30672_decode.7211_2	P07998	-0.6621	0.698	-0.698	-1	-0.6838	-1.02	-1.003	-0.3108	-0.4777	-0.09852	0.2316	0.5255	0.4577	RNASE1	cluster 1
SERPINA6	uniprot.P08185_ukb.OID30743_decode.4785_30	P08185	0.1912	-0.2023	0.2023	0.2961	0.1865	0.2793	0.2745	0.1288	0.1774	0.0082	-0.1176	-0.07481	-0.08149	SERPINA6	cluster 5
MMP2	uniprot.P08253_ukb.NA_decode.4160_49	P08253	0.2748	-0.2792	0.2792	0.2415	0.01381	0.1761	0.1629	0.04902	0.1493	-0.0248	-0.1241	-0.3292	-0.08997	MMP2	cluster 5
SOD3	uniprot.P08294_ukb.OID30683_decode.5660_51	P08294	0.2159	-0.2127	0.2127	0.07349	-0.1431	-0.006107	-0.01862	0.02308	0.06963	-0.1148	-0.1465	-0.1785	0.001529	SOD3	cluster 5
LPA	uniprot.P08519_ukb.OID30747_decode.NA	P08519	0.0354	-0.03232	0.03232	-0.02531	-0.06435	-0.03941	-0.04362	-0.03177	-0.005783	0.04619	0.03887	0.05035	0.0651	LPA	cluster 4
CFH	uniprot.P08603_ukb.OID30790_decode.4159_130	P08603	-0.2233	0.2245	-0.2245	-0.1295	0.0864	-0.05961	-0.04603	-0.1049	-0.3111	0.008477	0.2223	0.2374	0.009114	CFH	cluster 2
SERPINF2	uniprot.P08697_ukb.OID30779_decode.3024_18	P08697	0.1152	-0.1191	0.1191	0.1725	0.1076	0.1663	0.1627	0.08289	-0.0207	0.1369	0.1314	0.07883	0.01231	SERPINF2	cluster 5
KRT19	uniprot.P08727_ukb.OID20596_decode.15606_19	P08727	-0.2592	0.2707	-0.2707	-0.3786	-0.2091	-0.3495	-0.3425	-0.06998	-0.03508	0.1772	0.174	0.2441	0.2921	KRT19	cluster 2
FGF2	uniprot.P09038_ukb.OID20503_decode.3025_50	P09038	-0.02006	0.01954	-0.01954	-0.01458	-3.44e-05	-0.01002	-0.01067	0.03912	-0.05039	0.01868	0.05003	0.03472	0.001266	FGF2	cluster 3
DBH	uniprot.P09172_ukb.OID30703_decode.NA	P09172	NA	NA	NA	NA	NA	NA	NA	NA	NA	NA	NA	NA	NA	DBH	#N/A
MMP7	uniprot.P09237_ukb.OID20087_decode.2789_26	P09237	-0.111	0.1221	-0.1221	-0.1107	-0.01049	-0.07992	-0.07797	0.1054	-0.1944	-0.001668	0.1192	0.1583	-0.03397	MMP7	cluster 3
MMP10	uniprot.P09238_ukb.OID20687_decode.8479_4	P09238	-0.01336	0.01886	-0.01886	-0.1488	-0.1844	-0.1796	-0.1819	-0.03488	-0.06342	0.008331	0.04978	-0.02511	0.001763	MMP10	cluster 4
CD48	uniprot.P09326_ukb.OID20692_decode.3292_75	P09326	-0.187	0.2023	-0.2023	-0.324	-0.2279	-0.3164	-0.3137	0.003673	-0.0739	-0.03006	0.02318	0.05792	0.06073	CD48	cluster 2
CXCL1	uniprot.P09341_ukb.OID20762_decode.2985_35	P09341	-0.11	0.1136	-0.1136	-0.1037	-0.01203	-0.07658	-0.07219	0.01981	-0.0456	0.001851	0.03011	0.05618	0.02742	CXCL1	cluster 3
INHBB_1	uniprot.P09529_ukb.OID30625_decode.16746_12	P09529	-0.4328	0.4485	-0.4485	-0.5221	-0.2036	-0.449	-0.429	-0.1407	-0.2165	-0.08953	0.06908	0.1928	0.1234	INHBB	cluster 6
CD7	uniprot.P09564_ukb.OID30543_decode.12008_3	P09564	-0.2616	0.2732	-0.2732	-0.3872	-0.2237	-0.3578	-0.3532	-0.09832	-0.1832	0.02508	0.1388	0.1466	0.1721	CD7	cluster 6
CSF1	uniprot.P09603_ukb.OID20719_decode.3738_54	P09603	-0.3079	0.3296	-0.3296	-0.484	-0.294	-0.4527	-0.4451	-0.1723	-0.3472	-0.06643	0.1768	0.09549	0.06941	CSF1	cluster 6
CD3G	uniprot.P09693_ukb.OID30448_decode.7924_7	P09693	0.02857	-0.02858	0.02858	0.08134	0.0808	0.08834	0.08755	0.004025	-0.02659	-0.09783	-0.06874	-0.0345	-0.1233	CD3G	cluster 4
FGR	uniprot.P09769_ukb.OID20828_decode.3810_50	P09769	-0.1634	0.1683	-0.1683	-0.1897	-0.0367	-0.1522	-0.1438	0.05364	-0.1847	0.05036	0.1672	0.1708	0.08545	FGR	cluster 2
C1S	uniprot.P09871_ukb.OID30731_decode.8840_61	P09871	-0.3867	0.4011	-0.4011	-0.4047	-0.0923	-0.3155	-0.3017	-0.2995	-0.5022	-0.01036	0.3264	0.362	0.1578	C1S	cluster 6
PARP1_1	uniprot.P09874_ukb.OID20500_decode.8893_29	P09874	-0.3156	0.325	-0.325	-0.3606	-0.133	-0.3167	-0.3005	-0.04463	-0.2036	-0.02563	0.1179	0.2929	0.1804	PARP1	cluster 2
CSF3	uniprot.P09919_ukb.OID20491_decode.4840_73	P09919	-0.1307	0.1431	-0.1431	-0.2218	-0.1399	-0.2035	-0.2022	-0.07692	-0.2403	-0.1159	0.05309	0.2864	0.1327	CSF3	cluster 2
ALPI	uniprot.P09923_ukb.OID30497_decode.17441_4	P09923	0.01629	-0.01478	0.01478	-0.02223	-0.04236	-0.03048	-0.03573	0.1096	0.02214	0.2199	0.187	0.1979	0.1126	ALPI	cluster 2
C1QTNF9	uniprot.P0C862_ukb.OID30620_decode.16605_2	P0C862	0.2304	-0.2312	0.2312	0.1172	-0.09049	0.04877	0.03739	0.03537	0.01885	-0.1132	-0.118	-0.08075	-0.04337	C1QTNF9	cluster 5
PGA4	uniprot.P0DJD7_ukb.OID30699_decode.NA	P0DJD7	-0.02277	0.03133	-0.03133	-0.1569	-0.1819	-0.1819	-0.1857	-0.01879	-0.001205	-0.02214	-0.01757	0.0007598	0.1287	PGA4	cluster 4
CSH1	uniprot.P0DML2_ukb.OID30667_decode.NA	P0DML2	NA	NA	NA	NA	NA	NA	NA	NA	NA	NA	NA	NA	NA	CSH1	#N/A
HSPA1A	uniprot.P0DMV8_ukb.OID20718_decode.4124_24	P0DMV8	-0.1636	0.1682	-0.1682	-0.09159	0.06215	-0.04204	-0.03432	0.04096	-0.2444	0.1254	0.2661	0.1586	0.03849	HSPA1A	cluster 3
CGB3_CGB5_CGB8	uniprot.P0DN86_ukb.OID30671_decode.NA	P0DN86	-0.05425	0.09257	-0.09257	-0.1619	-0.173	-0.1845	-0.1733	-0.38	-0.03194	-0.02032	-0.01121	-0.1012	-0.04833	CGB3_CGB5_CGB8	cluster 4
IGLC2	uniprot.P0DOY2_ukb.OID30740_decode.NA	P0DOY2	-0.3229	0.3397	-0.3397	-0.4278	-0.1989	-0.3793	-0.3671	-0.1132	-0.2566	-0.04975	0.1277	0.2537	0.1764	IGLC2	cluster 6
AMY1A_AMY1B_AMY1C	uniprot.P0DUB6_P0DTE7_P0DTE8_ukb.OID30707_decode.NA	P0DUB6_P0DTE7_P0DTE8	0.1156	-0.1141	0.1141	0.04682	-0.07265	0.0009953	-0.006416	0.04947	0.1254	-0.07051	-0.1505	-0.1383	-0.01483	AMY1A_AMY1B_AMY1C	cluster 4
GLI2	uniprot.P10070_ukb.OID30429_decode.NA	P10070	0.1578	-0.1467	0.1467	0.05347	-0.09224	-0.0001037	-0.01492	0.08161	0.004526	-0.01703	-0.0154	0.1032	-0.003459	GLI2	cluster 4
GZMB	uniprot.P10144_ukb.OID20604_decode.4133_54	P10144	0.003653	-0.001822	0.001822	0.02915	0.02384	0.02734	0.0284	0.009587	-0.02431	0.05049	0.05606	0.008657	-0.03922	GZMB	cluster 3
CCL3_1	uniprot.P10147_ukb.OID20610_decode.3040_59	P10147	-0.488	0.504	-0.504	-0.6118	-0.2671	-0.5392	-0.5196	-0.126	-0.2718	0.07427	0.2502	0.3759	0.291	CCL3	cluster 6
TXN	uniprot.P10599_ukb.OID30670_decode.8813_160	P10599	-0.1091	0.1076	-0.1076	-0.03076	0.08122	0.009837	0.01553	0.03232	-0.09717	-0.06104	0.0139	0.03201	-0.06972	TXN	cluster 3
C7	uniprot.P10643_ukb.OID30766_decode.2888_49	P10643	0.07946	-0.08242	0.08242	0.1417	0.1017	0.1379	0.138	0.008775	0.07027	-0.03605	-0.0781	-0.09162	-0.1001	C7	cluster 5
FGF6	uniprot.P10767_ukb.OID30443_decode.4130_71	P10767	0.04097	-0.01629	0.01629	-0.04793	-0.04641	-0.04929	-0.05835	0.318	-0.1749	-0.07292	0.02496	0.07598	-0.01142	FGF6	cluster 4
CLU	uniprot.P10909_ukb.OID30732_decode.4542_24	P10909	0.08994	-0.09478	0.09478	0.1112	0.05183	0.1014	0.09656	-0.05982	-0.08335	0.009085	0.07182	-0.02031	-0.02887	CLU	cluster 4
GHR	uniprot.P10912_ukb.OID30574_decode.2948_58	P10912	-0.1491	0.1551	-0.1551	-0.09728	0.03806	-0.05115	-0.0442	-0.02996	-0.1877	0.07959	0.2015	0.3347	0.04972	GHR	cluster 2
CD8B	uniprot.P10966_ukb.NA_decode.9310_2	P10966	-0.1682	0.1653	-0.1653	-0.1103	0.03429	-0.05966	-0.05109	-0.03582	0.002116	0.1016	0.09019	0.105	0.03987	CD8B	cluster 4
MBL2	uniprot.P11226_ukb.OID30759_decode.3000_66	P11226	0.008545	-0.008866	0.008866	0.03628	0.0307	0.04002	0.04018	0.05103	0.02788	-0.08677	-0.1052	-0.1463	-0.03684	MBL2	cluster 4
RALB	uniprot.P11234_ukb.OID30567_decode.18432_32	P11234	-0.009388	0.007403	-0.007403	-0.04393	-0.03554	-0.03926	-0.04363	0.006499	0.002515	0.02484	0.005092	0.02109	0.03348	RALB	cluster 3
BCR	uniprot.P11274_ukb.OID20558_decode.NA	P11274	-0.1187	0.1232	-0.1232	-0.05384	0.05764	-0.01527	-0.008766	0.04381	-0.177	0.1108	0.2152	0.1253	-0.008992	BCR	cluster 3
FGF3	uniprot.P11487_ukb.OID30544_decode.7894_155	P11487	0.1948	-0.1982	0.1982	0.3709	0.2789	0.342	0.3396	0.1394	0.02893	-0.004176	-0.01696	-0.2519	-0.09138	FGF3	cluster 5
SCGB1A1	uniprot.P11684_ukb.OID20688_decode.NA	P11684	-0.05199	0.06286	-0.06286	-0.1836	-0.1847	-0.2019	-0.2026	-0.04085	-0.01541	-0.06934	-0.04992	0.02327	0.05846	SCGB1A1	cluster 4
FGF5	uniprot.P12034_ukb.OID20490_decode.3065_65	P12034	0.04781	-0.04604	0.04604	-0.06797	-0.1478	-0.106	-0.1141	0.07542	0.08685	0.0703	0.001547	-0.06582	0.04116	FGF5	cluster 4
CKMT1A_CKMT1B	uniprot.P12532_ukb.OID20721_decode.15542_19	P12532	0.05012	-0.05146	0.05146	0.01368	-0.04652	-0.007847	-0.01175	-0.09042	-0.09108	0.02909	0.08834	0.005305	0.03836	CKMT1A_CKMT1B	cluster 4
GZMA	uniprot.P12544_ukb.OID20663_decode.3440_7	P12544	-0.1397	0.149	-0.149	-0.1981	-0.1142	-0.1804	-0.1771	-0.0461	-0.1323	0.0319	0.1178	0.1541	0.0119	GZMA	cluster 2
ACE	uniprot.P12821_ukb.OID30696_decode.10714_7	P12821	0.06168	-0.05826	0.05826	0.0175	-0.04366	-0.005395	-0.009052	0.01869	-0.0187	-0.05199	-0.04376	-0.01086	-0.01637	ACE	cluster 4
MLN	uniprot.P12872_ukb.OID20541_decode.5631_83	P12872	-0.05154	0.0562	-0.0562	-0.1125	-0.09095	-0.1131	-0.1134	-0.04782	-0.05139	0.04394	0.07241	0.1542	0.07896	MLN	cluster 4
PEPD	uniprot.P12955_ukb.OID30688_decode.NA	P12955	-0.02412	0.02234	-0.02234	-0.03709	-0.02062	-0.0361	-0.0376	-0.03899	0.08452	0.03902	-0.02835	0.03675	0.09742	PEPD	cluster 4
IL7	uniprot.P13232_ukb.OID20535_decode.4140_3	P13232	-0.0247	0.0226	-0.0226	0.06421	0.11	0.0853	0.09075	0.01043	-0.06244	0.05489	0.08806	0.006244	-0.07313	IL7	cluster 3
CCL4	uniprot.P13236_ukb.OID20695_decode.NA	P13236	-0.1912	0.1977	-0.1977	-0.1668	-0.01263	-0.1227	-0.1117	-0.05978	-0.08923	0.009232	0.06363	0.1561	0.09535	CCL4	cluster 2
CCL5	uniprot.P13501_ukb.OID20412_decode.5480_49	P13501	-0.07231	0.07141	-0.07141	-0.01427	0.06561	0.01166	0.01715	0.02135	-0.03681	0.01691	0.04318	0.02907	-0.01588	CCL5	cluster 3
TPT1	uniprot.P13693_ukb.OID20476_decode.3872_2	P13693	-0.02469	0.02241	-0.02241	-0.04825	-0.007792	-0.02735	-0.03263	0.1203	0.1335	-0.07743	-0.1627	0.07741	0.006835	TPT1	cluster 4
OSM	uniprot.P13725_ukb.OID20574_decode.14063_17	P13725	-0.2798	0.2854	-0.2854	-0.2387	-0.008638	-0.1744	-0.1611	-0.09546	-0.2446	0.02439	0.1888	0.1967	0.04078	OSM	cluster 2
HLA-E	uniprot.P13747_ukb.OID20532_decode.NA	P13747	-0.3841	0.4091	-0.4091	-0.6137	-0.3936	-0.5844	-0.576	-0.1148	-0.2044	-0.003461	0.1395	0.2627	0.2546	HLA-E	cluster 6
CTSE	uniprot.P14091_ukb.OID30628_decode.15376_134	P14091	0.01159	-0.01051	0.01051	-0.02883	-0.05731	-0.04488	-0.04787	0.06108	0.05496	0.0353	0.002188	0.02784	0.08254	CTSE	cluster 4
SELL	uniprot.P14151_ukb.OID30752_decode.4831_4	P14151	-0.0548	0.05835	-0.05835	-0.05963	-0.02152	-0.05183	-0.04873	0.03654	-0.001208	-0.03718	-0.03835	-0.0389	-0.03222	SELL	cluster 4
MIF	uniprot.P14174_ukb.OID21073_decode.8221_19	P14174	-0.1871	0.1932	-0.1932	-0.1033	0.07524	-0.04101	-0.03243	0.1114	-0.07751	0.0697	0.1153	0.1344	-0.01872	MIF	cluster 3
HGF	uniprot.P14210_ukb.OID20656_decode.2681_23	P14210	-0.3328	0.3427	-0.3427	-0.2798	0.0006464	-0.1951	-0.1794	-0.07027	-0.3269	0.01087	0.2312	0.2864	0.02066	HGF	cluster 2
HCLS1	uniprot.P14317_ukb.OID20648_decode.NA	P14317	-0.1923	0.1916	-0.1916	-0.06094	0.133	0.007038	0.01823	0.02775	-0.1401	0.11	0.192	0.06348	-0.0217	HCLS1	cluster 3
MMP9	uniprot.P14780_ukb.OID21103_decode.2579_17	P14780	-0.1638	0.1649	-0.1649	-0.14	0.0001226	-0.1027	-0.09283	-0.06814	-0.1591	0.05256	0.1545	0.1572	0.05343	MMP9	cluster 2
IL2RB	uniprot.P14784_ukb.OID20450_decode.9343_16	P14784	-0.1396	0.1528	-0.1528	-0.2362	-0.1688	-0.2311	-0.2303	-0.07961	-0.005866	-0.08193	-0.06175	-0.02044	0.05071	IL2RB	cluster 2
LIF	uniprot.P15018_ukb.OID20824_decode.7790_21	P15018	-0.09861	0.1034	-0.1034	-0.01417	0.08907	0.02396	0.03198	-0.117	-0.2446	-0.02784	0.1572	0.08245	0.001901	LIF	cluster 2
IL9	uniprot.P15248_ukb.OID31298_decode.5834_18	P15248	0.01808	-0.006833	0.006833	-0.1054	-0.1527	-0.1285	-0.1313	-0.04494	-0.06021	-0.02606	0.01522	-0.02388	-0.05314	IL9	cluster 4
IFNGR1	uniprot.P15260_ukb.OID20678_decode.5825_49	P15260	-0.0428	0.06198	-0.06198	-0.33	-0.3873	-0.3865	-0.3916	-0.09859	-0.106	-0.1351	-0.04397	-0.07588	0.118	IFNGR1	cluster 2
B4GALT1	uniprot.P15291_ukb.OID20780_decode.13381_49	P15291	-0.07357	0.08963	-0.08963	-0.2766	-0.2794	-0.3064	-0.3074	-0.09523	-0.08218	-0.08733	-0.0206	0.0006602	0.1469	B4GALT1	cluster 2
NME1	uniprot.P15531_ukb.OID30451_decode.5909_51	P15531	0.2865	-0.2809	0.2809	0.217	0.01256	0.1628	0.1451	0.1389	0.08531	-0.1485	-0.1904	-0.1081	-0.1165	NME1	cluster 5
VEGFA	uniprot.P15692_ukb.OID20650_decode.19437_61	P15692	-0.4221	0.4371	-0.4371	-0.4404	-0.11	-0.3645	-0.3448	0.04779	-0.2241	0.05668	0.2078	0.3676	0.1878	VEGFA	cluster 6
RPA2	uniprot.P15927_ukb.OID30453_decode.19264_6	P15927	-0.1412	0.1387	-0.1387	-0.02718	0.1232	0.03747	0.04113	0.07522	0.001181	0.05026	0.0497	0.1441	-0.02727	RPA2	cluster 3
PNLIP	uniprot.P16233_ukb.OID30693_decode.15613_16	P16233	0.08922	-0.08529	0.08529	0.02054	-0.07589	-0.01734	-0.02288	-0.0006887	0.025	-0.04707	-0.05764	-0.02695	-0.03293	PNLIP	cluster 4
EPCAM	uniprot.P16422_ukb.OID20743_decode.NA	P16422	0.05431	-0.05744	0.05744	0.06336	0.02599	0.05707	0.05387	0.04457	0.02134	0.05127	0.03102	0.0191	0.04238	EPCAM	cluster 3
ABO	uniprot.P16442_ukb.OID30675_decode.9253_52	P16442	NA	NA	NA	NA	NA	NA	NA	NA	NA	NA	NA	NA	NA	ABO	#N/A
MGMT	uniprot.P16455_ukb.OID20588_decode.NA	P16455	-0.1019	0.1032	-0.1032	-0.03791	0.06179	-0.003331	0.002362	0.04679	-0.09411	0.1165	0.1652	0.06166	0.004174	MGMT	cluster 3
CD36	uniprot.P16671_ukb.OID30485_decode.2973_15	P16671	-0.06685	0.07204	-0.07204	-0.08203	-0.03226	-0.06973	-0.06719	-0.004042	-0.1201	0.01891	0.1034	0.08472	0.01892	CD36	cluster 3
NAGA	uniprot.P17050_ukb.OID30509_decode.NA	P17050	-0.02984	0.03347	-0.03347	-0.001439	0.02638	0.01082	0.01069	0.09264	-0.03738	0.04789	0.06674	0.08163	-0.05673	NAGA	cluster 3
HSPA6	uniprot.P17066_ukb.NA_decode.13672_3	P17066	-0.1667	0.162	-0.162	-0.1095	0.04561	-0.0582	-0.04861	-0.01289	-0.05295	0.06345	0.09979	0.1146	0.04339	HSPA6	cluster 4
ITGA2	uniprot.P17301_ukb.OID30570_decode.15603_20	P17301	0.2025	-0.201	0.201	0.1295	-0.05676	0.06768	0.05713	0.02986	0.0505	-0.005199	-0.03548	-0.07392	-0.009649	ITGA2	cluster 5
TYRP1	uniprot.P17643_ukb.OID30517_decode.NA	P17643	-0.0652	0.06758	-0.06758	-0.06694	-0.01661	-0.05456	-0.0547	-0.0263	0.06094	0.1758	0.1147	0.03912	0.1127	TYRP1	cluster 3
CR1	uniprot.P17927_ukb.OID30697_decode.19556_12	P17927	-0.1726	0.1802	-0.1802	-0.2189	-0.09626	-0.1911	-0.1859	0.00731	-0.03989	-0.04355	-0.01278	0.09539	0.03985	CR1	cluster 2
IL1RN	uniprot.P18510_ukb.OID20700_decode.5353_89	P18510	-0.3013	0.3116	-0.3116	-0.3048	-0.06447	-0.2403	-0.2275	-0.08303	-0.2472	0.01232	0.1776	0.2928	0.1099	IL1RN	cluster 2
ITGB6	uniprot.P18564_ukb.OID20493_decode.7737_76	P18564	0.1903	-0.1902	0.1902	0.08139	-0.1087	0.009916	0.001068	-0.05254	-0.04643	-0.1351	-0.08243	-0.03348	-0.02638	ITGB6	cluster 5
CD58	uniprot.P19256_ukb.OID20716_decode.10938_13	P19256	0.07915	-0.06732	0.06732	-0.1497	-0.2869	-0.2188	-0.2274	-0.05588	-0.04183	-0.1475	-0.09817	-0.05795	0.007776	CD58	cluster 4
VCAM1	uniprot.P19320_ukb.OID20396_decode.2967_8	P19320	-0.2491	0.2577	-0.2577	-0.2914	-0.1064	-0.2455	-0.2367	-0.0448	-0.04376	-0.04136	-0.01492	0.08503	0.02245	VCAM1	cluster 2
TRIM21	uniprot.P19474_ukb.OID20533_decode.NA	P19474	-0.1377	0.137	-0.137	-0.05199	0.08438	-0.0021	0.003581	0.04691	-0.07519	0.08208	0.1227	0.1381	0.01167	TRIM21	cluster 3
AOC1	uniprot.P19801_ukb.OID20452_decode.15486_126	P19801	-0.01778	0.01899	-0.01899	-0.05276	-0.05726	-0.05086	-0.05504	0.06334	-0.09433	-0.08394	-0.0006889	0.07459	0.007201	AOC1	cluster 4
ITIH1	uniprot.P19827_ukb.OID30722_decode.7955_195	P19827	0.1755	-0.1768	0.1768	0.1794	0.05944	0.153	0.1458	-0.05361	-0.03088	-0.005427	0.0221	0.032	-0.005896	ITIH1	cluster 5
CXCL3	uniprot.P19876_ukb.OID20788_decode.NA	P19876	-0.118	0.1221	-0.1221	-0.0264	0.09528	0.02041	0.02637	0.1055	-0.07648	0.1234	0.1592	0.09285	-0.04385	CXCL3	cluster 3
NCF2	uniprot.P19878_ukb.OID20567_decode.10047_12	P19878	-0.1579	0.1536	-0.1536	-0.1085	0.04363	-0.06757	-0.05823	0.07615	-0.07056	0.02071	0.06949	0.1024	-0.03122	NCF2	cluster 3
FST	uniprot.P19883_ukb.OID20770_decode.4132_27	P19883	-0.1997	0.205	-0.205	-0.1625	0.03178	-0.1025	-0.0912	0.05897	-0.1057	0.1289	0.1825	0.1674	0.1195	FST	cluster 2
TCN1	uniprot.P20061_ukb.OID30687_decode.19614_8	P20061	-0.0538	0.05615	-0.05615	-0.03845	0.006121	-0.02399	-0.02123	0.01528	-0.07033	-0.03749	0.0136	0.03853	-0.04896	TCN1	cluster 3
SPINK2	uniprot.P20155_ukb.OID30627_decode.13405_61	P20155	-0.2884	0.3078	-0.3078	-0.5355	-0.3975	-0.5409	-0.5347	-0.0234	-0.1817	-0.05033	0.08144	0.1246	0.2058	SPINK2	cluster 6
CD22	uniprot.P20273_ukb.OID20637_decode.NA	P20273	-0.228	0.2375	-0.2375	-0.2307	-0.0548	-0.1817	-0.173	0.004916	-0.2176	-0.06808	0.08673	0.1468	-0.05101	CD22	cluster 2
RAB6A	uniprot.P20340_ukb.OID20608_decode.NA	P20340	0.344	-0.3434	0.3434	0.3925	0.1155	0.3275	0.3122	0.1098	0.2561	-0.02329	-0.1861	-0.1348	-0.0415	RAB6A	cluster 5
ITGAL	uniprot.P20701_ukb.OID30537_decode.11617_1	P20701	-0.299	0.3034	-0.3034	-0.2326	0.03409	-0.1475	-0.136	-0.04618	-0.1954	0.1939	0.3045	0.2274	0.05454	ITGAL	cluster 2
PZP	uniprot.P20742_ukb.OID30730_decode.6580_29	P20742	-0.1426	0.1468	-0.1468	-0.1338	-0.02202	-0.1025	-0.09415	-0.0642	-0.1249	-0.01707	0.07508	0.08923	-0.0112	PZP	cluster 2
NTF3	uniprot.P20783_ukb.OID20591_decode.4145_58	P20783	0.2532	-0.2542	0.2542	0.1806	-0.05094	0.1069	0.09485	0.04574	0.01295	-0.03071	-0.03385	-0.1313	0.04552	NTF3	cluster 5
IL11	uniprot.P20809_ukb.OID20455_decode.4493_92	P20809	0.1015	-0.09814	0.09814	0.07383	-0.009585	0.05475	0.05226	0.0005479	-0.1193	-0.1205	-0.02435	-0.01034	0.03322	IL11	cluster 4
COL9A1	uniprot.P20849_ukb.OID20550_decode.15466_30	P20849	0.0981	-0.09148	0.09148	-0.05101	-0.1691	-0.1026	-0.1094	0.0047	0.02322	-0.1442	-0.144	-0.0274	0.0159	COL9A1	cluster 4
COL5A1	uniprot.P20908_ukb.OID30587_decode.NA	P20908	-0.1041	0.1091	-0.1091	-0.1005	-0.01863	-0.07886	-0.07593	0.01054	-0.09511	-0.0527	0.01066	0.1107	-0.03783	COL5A1	cluster 3
KITLG	uniprot.P21583_ukb.NA_decode.9377_25	P21583	0.2326	-0.228	0.228	0.05026	-0.1849	-0.03823	-0.05151	-0.07665	-0.06403	-0.1237	-0.07024	-0.1663	0.08658	KITLG	cluster 5
EPHA1	uniprot.P21709_ukb.OID20677_decode.3431_54	P21709	-0.3316	0.349	-0.349	-0.5086	-0.3043	-0.4754	-0.4669	-0.1652	-0.2265	-0.03676	0.1217	0.268	0.1815	EPHA1	cluster 6
CD72	uniprot.P21854_ukb.OID30641_decode.7009_8	P21854	-0.3209	0.3358	-0.3358	-0.3928	-0.1694	-0.3425	-0.3294	-0.05377	-0.178	-0.057	0.06982	0.1598	0.09039	CD72	cluster 6
ERBB3	uniprot.P21860_ukb.OID20705_decode.2617_56	P21860	0.09814	-0.1021	0.1021	0.1709	0.1166	0.1662	0.1653	0.1733	0.06216	0.1751	0.1098	0.03244	-0.06348	ERBB3	cluster 5
IL10	uniprot.P22301_ukb.OID20431_decode.2773_50	P22301	-0.1122	0.114	-0.114	-0.09784	-0.005008	-0.07018	-0.06594	0.03889	-0.1949	0.1861	0.3021	0.07253	-0.01327	IL10	cluster 2
ACHE	uniprot.P22303_ukb.OID30585_decode.15553_22	P22303	0.2318	-0.234	0.234	0.174	-0.0303	0.108	0.09997	0.02025	0.03848	-0.2006	-0.2	-0.09817	-0.1074	ACHE	cluster 5
IDS	uniprot.P22304_ukb.OID20619_decode.3198_4	P22304	0.2345	-0.2356	0.2356	0.2215	0.02089	0.1652	0.1545	0.04844	0.07139	-0.06829	-0.09896	-0.2247	-0.1761	IDS	cluster 5
FGFR4	uniprot.P22455_ukb.OID30646_decode.4988_49	P22455	0.07828	-0.07047	0.07047	-0.05642	-0.1605	-0.1022	-0.1103	-0.02003	-0.04699	-0.1027	-0.05086	-0.04757	0.0552	FGFR4	cluster 4
GAL	uniprot.P22466_ukb.OID20727_decode.15390_3	P22466	0.03351	-0.03416	0.03416	0.05301	0.02609	0.04864	0.04769	-0.01199	0.02403	0.06477	0.04474	-0.02924	0.02201	GAL	cluster 3
MMP8	uniprot.P22894_ukb.OID21019_decode.9172_69	P22894	-0.1323	0.1338	-0.1338	-0.1298	-0.02	-0.1045	-0.09532	-0.07624	-0.1602	0.04546	0.1476	0.1072	0.05029	MMP8	cluster 2
MRC1	uniprot.P22897_ukb.OID30694_decode.2637_77	P22897	-0.1897	0.1934	-0.1934	-0.1494	0.01769	-0.09456	-0.08664	-0.02699	-0.1123	0.03137	0.1034	0.1454	0.02138	MRC1	cluster 2
ITGA6	uniprot.P23229_ukb.OID20528_decode.NA	P23229	-0.01292	0.0181	-0.0181	-0.004261	0.001023	-0.0006567	-0.00199	0.01752	-0.04896	0.03104	0.06299	0.002763	0.06309	ITGA6	cluster 3
NPPC	uniprot.P23582_ukb.OID20568_decode.NA	P23582	-0.235	0.2595	-0.2595	-0.5403	-0.4559	-0.5584	-0.5569	-0.08717	-0.2585	-0.03588	0.151	0.2659	0.2605	NPPC	cluster 6
DGKA	uniprot.P23743_ukb.OID30546_decode.NA	P23743	-0.1496	0.1491	-0.1491	-0.0787	0.06316	-0.03112	-0.02381	0.03036	-0.1657	0.09048	0.1927	0.1614	0.03407	DGKA	cluster 3
IL32	uniprot.P24001_ukb.OID20605_decode.9051_13	P24001	0.08934	-0.07957	0.07957	-0.08899	-0.2203	-0.1462	-0.1596	0.1027	0.1518	-0.1531	-0.248	-0.03693	0.06719	IL32	cluster 4
FCAR	uniprot.P24071_ukb.OID20564_decode.4987_17	P24071	-0.35	0.3559	-0.3559	-0.2416	0.05089	-0.1542	-0.1366	-0.03159	-0.2935	0.007897	0.2113	0.1971	-0.0649	FCAR	cluster 2
CRHBP	uniprot.P24387_ukb.OID20747_decode.6039_24	P24387	-0.2253	0.2399	-0.2399	-0.3193	-0.1702	-0.292	-0.2844	-0.1155	-0.2083	0.02858	0.1685	0.2023	0.108	CRHBP	cluster 2
IL4R	uniprot.P24394_ukb.OID20576_decode.3055_54	P24394	-0.1283	0.1438	-0.1438	-0.2736	-0.2206	-0.2783	-0.278	-0.0003208	-0.1278	-0.1186	-0.03406	0.08778	0.07206	IL4R	cluster 2
EDNRB	uniprot.P24530_ukb.OID30421_decode.NA	P24530	NA	NA	NA	NA	NA	NA	NA	NA	NA	NA	NA	NA	NA	EDNRB	#N/A
ACP1	uniprot.P24666_ukb.OID30524_decode.3858_5	P24666	-0.09022	0.09107	-0.09107	-0.07214	-0.006981	-0.04935	-0.05202	0.01997	0.1668	0.007479	-0.1141	0.08255	0.1	ACP1	cluster 3
CCNE1	uniprot.P24864_ukb.OID30456_decode.NA	P24864	-0.03714	0.03867	-0.03867	-0.03891	-0.008777	-0.02976	-0.02818	0.08513	0.02521	0.1579	0.1227	0.06094	-0.00478	CCNE1	cluster 3
POLR2A	uniprot.P24928_ukb.OID30440_decode.NA	P24928	NA	NA	NA	NA	NA	NA	NA	NA	NA	NA	NA	NA	NA	POLR2A	#N/A
F2R	uniprot.P25116_ukb.OID20691_decode.NA	P25116	-0.1612	0.1705	-0.1705	-0.1544	-0.02308	-0.1152	-0.1092	-0.001942	-0.1152	0.1135	0.1794	0.1011	0.0601	F2R	cluster 2
FAS	uniprot.P25445_ukb.OID20316_decode.5392_73	P25445	-0.2263	0.2465	-0.2465	-0.4558	-0.3489	-0.4565	-0.4555	-0.05648	-0.1787	-0.04897	0.07898	0.1957	0.134	FAS	cluster 6
YY1	uniprot.P25490_ukb.OID30446_decode.17337_1	P25490	NA	NA	NA	NA	NA	NA	NA	NA	NA	NA	NA	NA	NA	YY1	#N/A
DNAJB2	uniprot.P25686_ukb.OID30661_decode.11438_6	P25686	-0.1175	0.1171	-0.1171	-0.09216	0.02148	-0.05317	-0.04898	0.06728	-0.06063	-0.006794	0.03223	0.09659	0.03094	DNAJB2	cluster 3
CD40	uniprot.P25942_ukb.OID20724_decode.NA	P25942	-0.203	0.2133	-0.2133	-0.2012	-0.04387	-0.1584	-0.151	0.02658	-0.1354	0.09268	0.1709	0.1351	0.06567	CD40	cluster 2
PTX3	uniprot.P26022_ukb.OID20570_decode.6447_73	P26022	-0.1384	0.1395	-0.1395	-0.1572	-0.06142	-0.1362	-0.1309	-0.06265	-0.05305	-0.02121	0.008306	0.05266	0.03402	PTX3	cluster 2
ACRV1	uniprot.P26436_ukb.OID30513_decode.10507_166	P26436	-0.1674	0.1738	-0.1738	-0.195	-0.06126	-0.1526	-0.149	-0.01998	-0.1993	0.02079	0.1555	0.2148	0.1375	ACRV1	cluster 2
MST1	uniprot.P26927_ukb.OID30713_decode.4407_10	P26927	-0.02847	0.02739	-0.02739	0.01753	0.05184	0.03259	0.035	-0.04972	-0.0522	0.02101	0.05337	0.04011	-0.02581	MST1	cluster 3
IL3RA	uniprot.P26951_ukb.OID20461_decode.13744_37	P26951	-0.005333	0.01512	-0.01512	-0.1408	-0.1848	-0.1748	-0.1776	-0.01017	-0.03629	-0.1094	-0.07261	-0.02845	0.01109	IL3RA	cluster 4
PON1	uniprot.P27169_ukb.OID30704_decode.4261_55	P27169	0.09957	-0.1002	0.1002	0.1758	0.1119	0.1653	0.1648	0.06944	0.1151	0.07706	-0.01044	-0.05173	-0.02234	PON1	cluster 5
YWHAQ	uniprot.P27348_ukb.OID30605_decode.7625_27	P27348	-0.07912	0.07853	-0.07853	-0.01994	0.06824	0.01455	0.01752	0.08782	-0.01753	0.03977	0.04092	0.07516	0.02835	YWHAQ	cluster 3
ARNT	uniprot.P27540_ukb.OID20432_decode.NA	P27540	0.0004448	0.009462	-0.009462	-0.03557	-0.05317	-0.03684	-0.04053	0.1565	0.0295	0.03452	0.008639	-0.07422	-0.09693	ARNT	cluster 4
CFP	uniprot.P27918_ukb.OID30784_decode.2960_66	P27918	-0.1963	0.2002	-0.2002	-0.172	-0.01168	-0.1241	-0.1151	-0.04062	-0.1801	-0.03177	0.09268	0.1851	0.03393	CFP	cluster 2
IL1R2	uniprot.P27930_ukb.OID20757_decode.14133_93	P27930	-0.02986	0.03265	-0.03265	0.03576	0.07563	0.0581	0.06047	0.107	0.02374	0.03926	0.01697	0.08249	-0.02688	IL1R2	cluster 3
CST5	uniprot.P28325_ukb.OID20995_decode.3803_10	P28325	0.09457	-0.08857	0.08857	-0.03134	-0.1434	-0.07542	-0.07894	-0.01162	0.01952	-0.0434	-0.04832	-0.03997	0.0708	CST5	cluster 4
PTPRM	uniprot.P28827_ukb.OID20598_decode.NA	P28827	-0.1077	0.1202	-0.1202	-0.1741	-0.1107	-0.1624	-0.1589	0.003652	-0.0766	-0.04313	0.01293	0.08629	0.02681	PTPRM	cluster 2
LAP3	uniprot.P28838_ukb.OID20436_decode.13959_7	P28838	-0.04878	0.05186	-0.05186	0.00215	0.06366	0.02992	0.03134	0.05268	-0.06566	0.02512	0.06958	0.07899	-0.002978	LAP3	cluster 3
HSD11B1	uniprot.P28845_ukb.OID20575_decode.NA	P28845	0.1078	-0.1081	0.1081	0.09746	0.001504	0.06833	0.06287	0.09611	0.1458	-0.04553	-0.143	-0.2171	-0.09684	HSD11B1	cluster 5
CD34	uniprot.P28906_ukb.OID21025_decode.NA	P28906	0.1995	-0.1947	0.1947	-0.0514	-0.2835	-0.1468	-0.1639	-0.04369	0.02057	-0.02601	-0.02858	-0.1593	0.02372	CD34	cluster 4
CCN2	uniprot.P29279_ukb.OID20709_decode.2975_19	P29279	-0.07452	0.07747	-0.07747	-0.05051	0.01842	-0.02836	-0.02459	0.03979	-0.02884	-0.02135	0.003611	0.02793	0.04044	CCN2	cluster 3
PTPN6	uniprot.P29350_ukb.OID20717_decode.4318_12	P29350	-0.02661	0.02773	-0.02773	0.04678	0.1021	0.08175	0.08333	0.1241	0.03443	0.07785	0.04158	0.03845	0.03448	PTPN6	cluster 3
IL12B	uniprot.P29460_ukb.OID20666_decode.13733_5	P29460	-0.246	0.2595	-0.2595	-0.3483	-0.1902	-0.3195	-0.3125	-0.05133	-0.1185	-0.01506	0.06466	0.1409	0.09932	IL12B	cluster 2
SERPINA4	uniprot.P29622_ukb.OID30774_decode.3449_58	P29622	0.06036	-0.06261	0.06261	0.07878	0.03857	0.06989	0.06806	0.00805	-0.007319	0.04856	0.05308	0.05163	-0.02794	SERPINA4	cluster 3
CD40LG	uniprot.P29965_ukb.OID20616_decode.3534_14	P29965	-0.03628	0.037	-0.037	0.02314	0.07686	0.04645	0.04942	0.06035	-0.06239	0.05528	0.08768	0.002967	-0.02776	CD40LG	cluster 3
ERP29	uniprot.P30040_ukb.OID30578_decode.13728_19	P30040	-0.115	0.1162	-0.1162	-0.04896	0.06975	-0.003551	0.001046	0.06562	-0.05187	0.07166	0.09946	0.08537	0.0006889	ERP29	cluster 3
PRDX5	uniprot.P30044_ukb.OID20644_decode.5017_19	P30044	-0.05157	0.05508	-0.05508	0.008251	0.08066	0.03933	0.04105	0.05202	0.008977	0.0673	0.0484	0.04798	-0.001064	PRDX5	cluster 3
GCHFR	uniprot.P30047_ukb.OID30631_decode.NA	P30047	-0.2891	0.3004	-0.3004	-0.4086	-0.2205	-0.3784	-0.3684	-0.06902	-0.1803	-0.06661	0.0562	0.2481	0.1268	GCHFR	cluster 6
PRDX3	uniprot.P30048_ukb.OID20483_decode.8358_30	P30048	-0.1029	0.1122	-0.1122	-0.06802	0.02865	-0.03456	-0.0322	0.0384	-0.1124	0.08985	0.1512	0.03498	0.03966	PRDX3	cluster 3
PDIA3	uniprot.P30101_ukb.OID30573_decode.4719_58	P30101	-0.189	0.2009	-0.2009	-0.2932	-0.1667	-0.272	-0.2663	-0.07006	-0.0779	0.001834	0.05256	0.1885	0.2045	PDIA3	cluster 2
CD6	uniprot.P30203_ukb.OID20649_decode.NA	P30203	-0.1806	0.1817	-0.1817	-0.1266	0.04107	-0.07089	-0.06095	0.02751	-0.1107	0.03794	0.1106	0.1772	-0.006403	CD6	cluster 3
PKLR	uniprot.P30613_ukb.OID20682_decode.15607_56	P30613	0.008001	-0.01019	0.01019	0.07417	0.07478	0.08335	0.08531	-0.0005415	0.03972	0.0257	-0.01692	-0.04032	0.03935	PKLR	cluster 3
ALDH3A1	uniprot.P30838_ukb.OID20512_decode.11480_1	P30838	-0.03212	0.03524	-0.03524	-0.01059	0.02017	-0.0001319	0.002114	0.0273	-0.0486	0.02818	0.05058	0.1161	0.002947	ALDH3A1	cluster 3
PRDX2	uniprot.P32119_ukb.OID30668_decode.NA	P32119	0.0006694	-0.005179	0.005179	-0.09855	-0.1336	-0.1177	-0.1186	-0.2625	-0.06787	-0.3267	-0.2551	-0.001968	0.04324	PRDX2	cluster 4
DCTD	uniprot.P32321_ukb.OID30657_decode.17756_69	P32321	-0.06968	0.06574	-0.06574	0.01533	0.1028	0.05478	0.05768	0.09821	-0.005484	0.08023	0.07395	0.0407	-0.02712	DCTD	cluster 3
GBP2	uniprot.P32456_ukb.OID20489_decode.18891_98	P32456	-0.14	0.1559	-0.1559	-0.1719	-0.07509	-0.1458	-0.1482	0.09419	0.01785	0.1166	0.09022	0.1974	0.02539	GBP2	cluster 2
CSF2RB_1	uniprot.P32927_ukb.OID30553_decode.11137_43	P32927	-0.2905	0.2947	-0.2947	-0.2943	-0.05646	-0.2226	-0.2091	0.04849	-0.07896	-0.08303	-0.006143	0.1125	0.0193	CSF2RB	cluster 2
CD70	uniprot.P32970_ukb.OID20599_decode.5807_77	P32970	-0.355	0.3824	-0.3824	-0.558	-0.347	-0.5361	-0.5241	-0.1702	-0.382	-0.007353	0.2633	0.1546	0.08307	CD70	cluster 6
LSP1	uniprot.P33241_ukb.OID20530_decode.NA	P33241	-0.3215	0.3307	-0.3307	-0.4489	-0.2057	-0.3957	-0.3836	-0.02376	-0.2966	0.002097	0.1985	0.3208	0.1554	LSP1	cluster 6
RNASE4	uniprot.P34096_ukb.OID30705_decode.5644_60	P34096	-0.4659	0.4984	-0.4984	-0.8246	-0.5768	-0.8061	-0.7983	-0.2669	-0.43	0.01281	0.2978	0.5345	0.4096	RNASE4	cluster 6
SHMT1	uniprot.P34896_ukb.OID20714_decode.12334_25	P34896	-0.1066	0.1088	-0.1088	-0.03051	0.08417	0.01156	0.01798	0.0783	-0.06419	0.05083	0.08008	0.1274	-0.02012	SHMT1	cluster 3
CA8	uniprot.P35219_ukb.OID30482_decode.11390_24	P35219	0.07019	-0.06673	0.06673	0.0521	-0.01454	0.03253	0.02831	-0.03734	-0.148	-0.133	-0.008166	0.0221	-0.01765	CA8	cluster 4
IL13	uniprot.P35225_ukb.OID20430_decode.3072_4	P35225	-0.2092	0.2189	-0.2189	-0.0915	0.1288	-0.01006	0.0049	-0.01316	-0.01777	-0.1681	-0.145	-0.033	-0.07742	IL13	cluster 4
SAA4	uniprot.P35542_ukb.OID30726_decode.15516_12	P35542	-0.01641	0.01977	-0.01977	0.04146	0.07779	0.06234	0.06726	-0.04576	-0.1219	0.01188	0.08956	0.1766	-0.01015	SAA4	cluster 3
ADD1	uniprot.P35611_ukb.OID30655_decode.NA	P35611	-0.07507	0.07617	-0.07617	-0.01468	0.06187	0.01969	0.0213	0.02668	-0.0286	0.03848	0.05308	0.0387	0.003783	ADD1	cluster 3
BSG	uniprot.P35613_ukb.OID20626_decode.3585_54	P35613	-0.1156	0.1342	-0.1342	-0.4088	-0.4032	-0.45	-0.4516	-0.1301	-0.2161	-0.1189	0.04368	0.04451	0.1249	BSG	cluster 6
TIMP3	uniprot.P35625_ukb.OID20684_decode.2480_58	P35625	-0.09067	0.09524	-0.09524	-0.03925	0.0536	-0.00837	-0.0033	0.06471	-0.0736	0.02181	0.06496	0.0425	-0.02058	TIMP3	cluster 3
CPOX	uniprot.P36551_ukb.OID30495_decode.18241_18	P36551	0.05377	-0.05449	0.05449	0.05331	0.01037	0.04097	0.03881	-0.04921	0.01567	-0.007973	-0.02542	-0.04541	-0.02663	CPOX	cluster 4
TGFBR1	uniprot.P36897_ukb.OID30502_decode.NA	P36897	-0.251	0.2888	-0.2888	-0.7767	-0.7468	-0.8513	-0.8577	-0.4177	-0.3597	-0.3647	-0.05637	0.151	0.4306	TGFBR1	cluster 5
LTBR	uniprot.P36941_ukb.OID20768_decode.2636_10	P36941	-0.2446	0.2611	-0.2611	-0.4726	-0.3476	-0.4674	-0.4614	-0.1838	-0.1839	-0.04663	0.0849	0.1332	0.1868	LTBR	cluster 6
SERPINF1	uniprot.P36955_ukb.OID30757_decode.9211_19	P36955	-0.3416	0.3667	-0.3667	-0.5528	-0.3419	-0.5264	-0.5159	-0.2139	-0.3807	-0.04367	0.2242	0.4018	0.25	SERPINF1	cluster 6
GMPR	uniprot.P36959_ukb.OID20641_decode.19254_125	P36959	NA	NA	NA	NA	NA	NA	NA	NA	NA	NA	NA	NA	NA	GMPR	#N/A
CFHR2	uniprot.P36980_ukb.OID30720_decode.15584_9	P36980	-0.1078	0.1121	-0.1121	-0.1784	-0.1071	-0.1672	-0.1661	-0.06009	-0.1307	0.001088	0.09017	0.07569	0.05739	CFHR2	cluster 2
HPCAL1	uniprot.P37235_ukb.OID20615_decode.17791_25	P37235	-0.05484	0.05579	-0.05579	0.03411	0.1123	0.07473	0.07683	0.1956	0.02931	0.1583	0.1125	0.03668	-0.03192	HPCAL1	cluster 3
SNCA	uniprot.P37840_ukb.OID30645_decode.8458_111	P37840	-0.1099	0.1117	-0.1117	-0.02556	0.09432	0.02209	0.02517	0.09729	-0.07082	0.03943	0.08133	0.1427	-0.003469	SNCA	cluster 3
MMP12	uniprot.P39900_ukb.OID21439_decode.4496_60	P39900	-0.1793	0.1873	-0.1873	-0.2322	-0.1051	-0.2035	-0.1964	0.04969	-0.09214	0.01859	0.07781	0.1691	0.1098	MMP12	cluster 2
GDNF	uniprot.P39905_ukb.OID20861_decode.5822_22	P39905	-0.1428	0.168	-0.168	-0.3259	-0.264	-0.3244	-0.3237	-0.09624	-0.2136	-0.1629	0.001075	0.1616	0.1132	GDNF	cluster 2
GP5	uniprot.P40197_ukb.OID30611_decode.7185_29	P40197	-0.07214	0.07253	-0.07253	-0.008489	0.07098	0.02352	0.02653	0.05999	0.008745	0.06912	0.05686	0.04505	-0.0443	GP5	cluster 3
CD79B	uniprot.P40259_ukb.OID20635_decode.6351_55	P40259	-0.2749	0.29	-0.29	-0.4183	-0.2464	-0.3927	-0.3858	-0.06458	-0.2077	-0.06163	0.09507	0.1025	0.09736	CD79B	cluster 6
MDH1	uniprot.P40925_ukb.OID30669_decode.3853_56	P40925	-0.09007	0.08846	-0.08846	-0.01948	0.07767	0.02068	0.02377	0.05568	-0.0744	-0.005366	0.04207	0.08972	-0.006631	MDH1	cluster 3
IL15	uniprot.P40933_ukb.OID20562_decode.19568_17	P40933	0.07037	-0.06814	0.06814	0.001743	-0.07403	-0.02695	-0.03207	0.01508	0.02958	-0.001134	-0.01423	0.04148	0.07528	IL15	cluster 4
LEP	uniprot.P41159_ukb.OID20187_decode.8484_24	P41159	-0.3833	0.3985	-0.3985	-0.3834	-0.08377	-0.3013	-0.2837	-0.1237	-0.2338	-0.01878	0.1409	0.3678	0.1116	LEP	cluster 6
CD200	uniprot.P41217_ukb.OID20603_decode.5112_73	P41217	0.1077	-0.09959	0.09959	-0.07455	-0.2202	-0.1409	-0.1496	-0.02542	0.04634	-0.05485	-0.08225	-0.1343	0.05961	CD200	cluster 4
CASP2	uniprot.P42575_ukb.OID20555_decode.4904_7	P42575	-0.04968	0.0528	-0.0528	0.05429	0.122	0.08357	0.08733	0.117	-0.006906	0.06963	0.06723	-0.04029	-0.03986	CASP2	cluster 3
IL12RB1	uniprot.P42701_ukb.OID20486_decode.2632_5	P42701	-0.3102	0.3243	-0.3243	-0.3402	-0.1145	-0.2834	-0.2739	-0.04123	-0.1528	0.03294	0.1214	0.1621	0.06774	IL12RB1	cluster 2
LIFR	uniprot.P42702_ukb.OID20606_decode.5837_49	P42702	0.1042	-0.09956	0.09956	0.04491	-0.06135	0.007693	0.002125	0.08857	0.04627	-0.03503	-0.06998	-0.09047	-0.03304	LIFR	cluster 4
WAS	uniprot.P42768_ukb.OID20479_decode.NA	P42768	-0.07401	0.0743	-0.0743	0.03133	0.1161	0.0698	0.07446	0.0739	0.001312	0.2014	0.1692	0.02508	0.002924	WAS	cluster 3
CXCL5	uniprot.P42830_ukb.OID20207_decode.2979_8	P42830	-0.08875	0.08911	-0.08911	-0.02679	0.06819	0.008575	0.0144	0.04458	-0.06478	0.1057	0.1435	0.05136	0.00771	CXCL5	cluster 3
CTSO	uniprot.P43234_ukb.OID20660_decode.9264_11	P43234	-0.1662	0.1738	-0.1738	-0.1869	-0.06276	-0.1526	-0.1477	0.02312	-0.1129	0.03413	0.1054	0.1265	0.01079	CTSO	cluster 2
BTD	uniprot.P43251_ukb.OID30754_decode.15644_1	P43251	0.03624	-0.04076	0.04076	0.1071	0.1055	0.1181	0.1173	0.0685	-0.01494	0.08799	0.08381	0.1213	-0.07235	BTD	cluster 3
PTPN9	uniprot.P43378_ukb.OID30437_decode.12633_3	P43378	0.033	-0.02677	0.02677	-0.01351	-0.04533	-0.02254	-0.02727	0.1194	0.04529	-0.07835	-0.0853	0.0305	0.08044	PTPN9	cluster 4
TNFRSF4	uniprot.P43489_ukb.OID20653_decode.3730_81	P43489	-0.2899	0.3089	-0.3089	-0.4675	-0.298	-0.4501	-0.4399	-0.171	-0.2514	-0.1343	0.05711	0.1481	0.1335	TNFRSF4	cluster 6
AFM	uniprot.P43652_ukb.OID30741_decode.4763_31	P43652	-0.1437	0.1457	-0.1457	-0.01741	0.1385	0.04429	0.05354	0.01951	-0.0716	0.09505	0.1311	0.3003	-0.01633	AFM	cluster 2
MMP13	uniprot.P45452_ukb.OID20807_decode.4925_54	P45452	0.1334	-0.1258	0.1258	-0.03635	-0.1796	-0.09851	-0.1104	-0.0481	0.02932	-0.09336	-0.1018	-0.05866	0.03409	MMP13	cluster 4
MAPK9	uniprot.P45984_ukb.OID20557_decode.15604_18	P45984	-0.04165	0.0493	-0.0493	-0.07282	-0.04996	-0.06532	-0.06563	0.05488	-0.05559	0.04579	0.07204	0.08099	0.07432	MAPK9	cluster 3
MKI67	uniprot.P46013_ukb.OID30455_decode.NA	P46013	-0.1443	0.1542	-0.1542	-0.2701	-0.1573	-0.2566	-0.2584	-0.08166	-0.273	-0.04628	0.1492	0.2066	0.1365	MKI67	cluster 2
CRKL	uniprot.P46109_ukb.OID20742_decode.9877_28	P46109	-0.1012	0.1022	-0.1022	-0.02875	0.0849	0.01638	0.02099	0.06573	-0.05376	0.07479	0.09876	0.08934	0.006795	CRKL	cluster 3
PLA2G4A	uniprot.P47712_ukb.OID20685_decode.NA	P47712	-0.09323	0.09592	-0.09592	0.00212	0.1057	0.04577	0.05002	0.05886	-0.1079	0.1213	0.1815	0.03993	-0.02537	PLA2G4A	cluster 3
FASLG	uniprot.P48023_ukb.OID20665_decode.3052_8	P48023	0.007765	-0.009395	0.009395	0.0276	0.02774	0.02866	0.02788	0.02517	0.07729	0.008373	-0.04864	-0.05484	-0.04845	FASLG	cluster 4
CXCL12	uniprot.P48061_ukb.OID20464_decode.3516_60	P48061	0.002432	-0.002162	0.002162	-0.01019	-0.01808	-0.01901	-0.01901	0.007042	-0.03493	-0.07028	-0.03705	-0.1693	-0.06531	CXCL12	cluster 4
GIPR	uniprot.P48546_ukb.OID30542_decode.NA	P48546	NA	NA	NA	NA	NA	NA	NA	NA	NA	NA	NA	NA	NA	GIPR	#N/A
CSNK1D	uniprot.P48730_ukb.OID30492_decode.11289_31	P48730	-0.004982	0.006876	-0.006876	0.00345	0.02267	0.0181	0.01413	0.1351	-0.007417	0.04442	0.04663	0.08124	-0.01955	CSNK1D	cluster 3
CEBPA	uniprot.P49715_ukb.OID30458_decode.18874_66	P49715	-0.274	0.289	-0.289	-0.3545	-0.1752	-0.3176	-0.3105	-0.06863	-0.3315	-0.06716	0.163	0.2588	0.07439	CEBPA	cluster 6
NUMB	uniprot.P49757_ukb.OID30568_decode.NA	P49757	-0.1569	0.1585	-0.1585	-0.1097	0.03337	-0.06299	-0.05754	0.01392	-0.1491	0.07442	0.1682	0.1587	0.0479	NUMB	cluster 3
PGF	uniprot.P49763_ukb.OID20673_decode.3078_1	P49763	-0.2775	0.294	-0.294	-0.3923	-0.2068	-0.3567	-0.348	-0.1187	-0.2216	-0.1378	0.02321	0.2165	0.122	PGF	cluster 6
VEGFB	uniprot.P49765_ukb.OID30554_decode.9453_12	P49765	-0.2604	0.2763	-0.2763	-0.395	-0.2263	-0.3713	-0.3615	-0.12	-0.2505	-0.1143	0.06799	0.2226	0.1021	VEGFB	cluster 6
FLT3LG	uniprot.P49771_ukb.OID20661_decode.14093_10	P49771	0.07307	-0.06931	0.06931	0.01929	-0.05031	-0.004479	-0.008024	-0.03194	-0.06498	-0.02549	0.01937	0.07697	0.05946	FLT3LG	cluster 4
KLK7	uniprot.P49862_ukb.OID30652_decode.3378_49	P49862	0.1681	-0.168	0.168	0.1146	-0.04225	0.05911	0.05449	0.0693	0.02385	-0.03362	-0.04595	-0.01334	-0.05887	KLK7	cluster 5
SELENOP	uniprot.P49908_ukb.OID30745_decode.NA	P49908	0.1791	-0.1762	0.1762	0.1138	-0.04214	0.06387	0.0522	0.01605	0.1821	0.03355	-0.1041	0.0448	0.241	SELENOP	cluster 5
MMP14	uniprot.P50281_ukb.NA_decode.5002_76	P50281	NA	NA	NA	NA	NA	NA	NA	NA	NA	NA	NA	NA	NA	MMP14	#N/A
SERPINB8	uniprot.P50452_ukb.OID20630_decode.19130_81	P50452	-0.2329	0.2431	-0.2431	-0.3143	-0.1532	-0.2838	-0.2727	-0.0007768	-0.1114	0.04592	0.1186	0.1506	0.1098	SERPINB8	cluster 2
ST13	uniprot.P50502_ukb.OID30624_decode.18387_7	P50502	-0.1016	0.1082	-0.1082	-0.1031	-0.02014	-0.07664	-0.07641	-0.03015	-0.1829	-0.05345	0.07561	0.09761	0.02345	ST13	cluster 3
VASP	uniprot.P50552_ukb.OID30692_decode.9762_14	P50552	-0.04541	0.04571	-0.04571	0.02195	0.0843	0.0561	0.05509	0.01409	-0.0647	0.0363	0.0768	0.04685	-0.03461	VASP	cluster 3
TNFSF10	uniprot.P50591_ukb.OID20611_decode.8833_20	P50591	-0.1826	0.1856	-0.1856	-0.1002	0.06656	-0.04432	-0.03411	0.05409	0.00477	-0.0524	-0.0626	0.01803	0.01801	TNFSF10	cluster 3
ANXA11	uniprot.P50995_ukb.OID20583_decode.17513_11	P50995	-0.04149	0.04068	-0.04068	0.007519	0.06929	0.03595	0.03653	0.04914	-0.01889	0.008898	0.01592	0.04757	0.02901	ANXA11	cluster 3
MMP16	uniprot.P51512_ukb.NA_decode.5268_49	P51512	0.2719	-0.3019	0.3019	0.39	0.1877	0.3387	0.3306	0.1293	-0.02012	0.1946	0.238	-0.2602	0.08543	MMP16	cluster 5
IRAK1	uniprot.P51617_ukb.OID20485_decode.NA	P51617	-0.1516	0.1528	-0.1528	-0.05908	0.0946	-0.003232	0.002976	0.06693	-0.1051	0.1449	0.1983	0.1124	-0.01408	IRAK1	cluster 3
CCL11	uniprot.P51671_ukb.OID20668_decode.5301_7	P51671	-0.02128	0.02338	-0.02338	-0.04229	-0.03736	-0.04595	-0.04492	0.04714	-0.01563	0.02577	0.03152	-0.01735	0.04137	CCL11	cluster 3
PRELP	uniprot.P51888_ukb.OID20766_decode.NA	P51888	0.01845	0.004458	-0.004458	-0.3405	-0.4689	-0.4245	-0.4316	-0.1201	-0.2601	-0.106	0.09535	0.1096	0.1995	PRELP	cluster 2
MAP2K6	uniprot.P52564_ukb.OID20552_decode.17175_5	P52564	-0.04813	0.0464	-0.0464	0.01638	0.078	0.04365	0.04636	0.03065	-0.01544	0.1162	0.1118	0.03946	-0.01013	MAP2K6	cluster 3
STAT2	uniprot.P52630_ukb.OID30536_decode.NA	P52630	-0.2011	0.2005	-0.2005	-0.1238	0.06113	-0.0649	-0.05696	0.0671	-0.1054	0.1243	0.1817	0.1433	0.03198	STAT2	cluster 3
RIDA	uniprot.P52758_ukb.OID30635_decode.14636_25	P52758	-0.322	0.3371	-0.3371	-0.3963	-0.1672	-0.3421	-0.3317	-0.0834	-0.3058	0.03589	0.2355	0.4174	0.1564	RIDA	cluster 6
CTSC	uniprot.P53634_ukb.OID20679_decode.3178_5	P53634	-0.15	0.1522	-0.1522	-0.08189	0.06072	-0.02865	-0.02051	0.02536	-0.00287	0.007276	0.006765	0.09023	-0.02852	CTSC	cluster 3
CRISP3	uniprot.P54108_ukb.OID30715_decode.3187_52	P54108	-0.0277	0.02761	-0.02761	-0.003387	0.02539	0.007633	0.008346	0.02797	-0.02058	-0.0779	-0.06076	-0.09529	-0.06443	CRISP3	cluster 4
TERF1	uniprot.P54274_ukb.OID30480_decode.10049_112	P54274	NA	NA	NA	NA	NA	NA	NA	NA	NA	NA	NA	NA	NA	TERF1	#N/A
PNLIPRP2	uniprot.P54317_ukb.OID20775_decode.15471_29	P54317	0.03411	-0.03604	0.03604	0.02347	-0.003063	0.01878	0.01696	0.08234	0.06476	0.03531	-0.01339	-0.05194	-0.07575	PNLIPRP2	cluster 4
EPHA4	uniprot.P54764_ukb.OID30622_decode.16288_17	P54764	0.008155	0.006301	-0.006301	-0.2144	-0.2907	-0.2669	-0.2733	-0.08806	-0.03508	-0.1094	-0.0697	-0.02037	0.06472	EPHA4	cluster 2
MFAP4	uniprot.P55083_ukb.OID30598_decode.5636_10	P55083	0.1008	-0.1012	0.1012	0.1015	0.03031	0.0848	0.08063	0.03635	0.01292	-0.04371	-0.04331	-0.08808	-0.05516	MFAP4	cluster 4
MANF	uniprot.P55145_ukb.OID20707_decode.9223_11	P55145	-0.09749	0.1003	-0.1003	-0.03324	0.07261	0.009177	0.01333	0.09699	-0.03606	0.0806	0.093	0.07772	-0.007297	MANF	cluster 3
CASP9	uniprot.P55211_ukb.OID30530_decode.NA	P55211	-0.07538	0.08167	-0.08167	-0.01241	0.05374	0.0112	0.01622	0.03451	-0.08711	0.09687	0.1405	0.1096	0.007747	CASP9	cluster 3
CCL23	uniprot.P55773_ukb.OID20693_decode.2913_1	P55773	-0.2435	0.2606	-0.2606	-0.4689	-0.3541	-0.4686	-0.4656	-0.01975	-0.1831	0.07806	0.2014	0.307	0.2581	CCL23	cluster 6
BID	uniprot.P55957_ukb.OID20517_decode.5798_3	P55957	-0.2238	0.224	-0.224	-0.1114	0.1143	-0.03332	-0.02292	0.05366	-0.116	0.05939	0.1337	0.2195	0.05316	BID	cluster 2
MARS1	uniprot.P56192_ukb.OID30658_decode.NA	P56192	-0.1207	0.1218	-0.1218	-0.04023	0.07918	0.003306	0.007732	0.07427	-0.07649	0.08647	0.1264	0.11	-0.007038	MARS1	cluster 3
LGALS4	uniprot.P56470_ukb.OID20748_decode.2982_82	P56470	-0.2337	0.2438	-0.2438	-0.3031	-0.1328	-0.2604	-0.2545	-0.0123	-0.1342	0.09763	0.1717	0.3355	0.1773	LGALS4	cluster 2
PER3	uniprot.P56645_ukb.OID30511_decode.NA	P56645	-0.05247	0.05019	-0.05019	0.005987	0.06693	0.03036	0.03466	0.08547	-0.05757	0.1073	0.1349	0.07696	-0.0468	PER3	cluster 3
RGS8	uniprot.P57771_ukb.OID20454_decode.11666_72	P57771	-0.16	0.1676	-0.1676	-0.16	-0.03632	-0.1208	-0.1142	-0.03106	-0.02403	0.01524	0.02456	0.1089	0.06851	RGS8	cluster 2
PROK1	uniprot.P58294_ukb.OID20543_decode.2247_20	P58294	-0.04632	0.04783	-0.04783	0.0245	0.07903	0.04634	0.0506	0.05615	-0.06352	0.03571	0.07807	-0.01663	-0.02801	PROK1	cluster 3
IL2	uniprot.P60568_ukb.OID20419_decode.3070_1	P60568	-0.5682	0.5397	-0.5397	-0.1275	0.3918	0.00424	0.06188	-0.03394	-1.02	-0.1248	0.9291	-0.5826	0.1899	IL2	cluster 2
FGF12	uniprot.P61328_ukb.OID30454_decode.4392_54	P61328	0.06924	-0.04428	0.04428	-0.1712	-0.3247	-0.2497	-0.266	-0.2366	-0.09093	-0.3905	-0.2603	-0.1737	0.1979	FGF12	cluster 2
PCBD1	uniprot.P61457_ukb.OID30610_decode.11313_100	P61457	-0.2307	0.2428	-0.2428	-0.2203	-0.0359	-0.1678	-0.1584	0.02315	-0.2312	0.06344	0.2082	0.3772	0.08319	PCBD1	cluster 2
B2M	uniprot.P61769_ukb.OID30725_decode.10574_10	P61769	-0.4741	0.5001	-0.5001	-0.7489	-0.466	-0.7064	-0.695	-0.1877	-0.303	-0.05952	0.1461	0.4162	0.3451	B2M	cluster 6
RAP1A	uniprot.P62834_ukb.OID30452_decode.NA	P62834	0.02592	-0.02004	0.02004	-0.04513	-0.1005	-0.07237	-0.0759	0.03771	-0.02166	-0.1047	-0.08043	0.09532	0.05107	RAP1A	cluster 4
EIF5A	uniprot.P63241_ukb.OID20423_decode.5888_29	P63241	0.1107	-0.1194	0.1194	0.1504	0.0945	0.1546	0.151	0.1259	0.02102	-0.07211	-0.0735	-0.03117	-0.197	EIF5A	cluster 5
FKBP1B	uniprot.P68106_ukb.OID20618_decode.11568_2	P68106	-0.05867	0.05769	-0.05769	-0.02347	0.04318	0.004708	0.006431	0.03223	0.01219	0.08	0.05746	0.05056	0.05151	FKBP1B	cluster 3
CXADR	uniprot.P78310_ukb.OID20561_decode.11204_80	P78310	-0.1205	0.1296	-0.1296	-0.223	-0.1586	-0.2157	-0.2134	-0.02621	-0.1313	0.06787	0.15	0.1643	0.155	CXADR	cluster 2
SRPK2	uniprot.P78362_ukb.OID20502_decode.NA	P78362	-0.1674	0.17	-0.17	-0.09667	0.05979	-0.0445	-0.03722	0.001937	-0.1654	0.09566	0.1911	0.1294	-0.004082	SRPK2	cluster 3
BTN3A2	uniprot.P78410_ukb.OID20540_decode.NA	P78410	-0.4267	0.4478	-0.4478	-0.5837	-0.3023	-0.5253	-0.5139	-0.02218	-0.2388	0.08605	0.2295	0.3271	0.2064	BTN3A2	cluster 6
CX3CL1	uniprot.P78423_ukb.OID20976_decode.2827_23	P78423	-0.09319	0.1069	-0.1069	-0.3158	-0.3164	-0.3464	-0.3455	-0.1783	-0.07083	-0.0008555	0.05012	0.001987	0.1121	CX3CL1	cluster 2
CCL20_1	uniprot.P78556_ukb.OID20671_decode.2468_62	P78556	-0.2434	0.2523	-0.2523	-0.1531	0.05816	-0.08899	-0.07568	-0.05569	-0.2381	0.08913	0.2396	0.1759	0.01339	CCL20	cluster 2
CCL7	uniprot.P80098_ukb.OID20523_decode.4886_3	P80098	-0.2564	0.2643	-0.2643	-0.2293	-0.01101	-0.1688	-0.154	-0.01811	-0.1795	0.0557	0.1686	0.187	0.08389	CCL7	cluster 2
CXCL6	uniprot.P80162_ukb.OID20613_decode.3495_15	P80162	-0.09508	0.1003	-0.1003	-0.109	-0.03395	-0.08677	-0.08609	0.04917	-0.05442	0.04603	0.07765	0.09696	0.04903	CXCL6	cluster 3
S100A12	uniprot.P80511_ukb.OID21374_decode.5852_6	P80511	-0.1215	0.1176	-0.1176	-0.1311	-0.02067	-0.1115	-0.1043	-0.04306	-0.1292	-0.01037	0.07969	0.1276	0.09735	S100A12	cluster 3
DEFB103A_DEFB103B	uniprot.P81534_ukb.OID30534_decode.5679_16	P81534	-0.1495	0.1577	-0.1577	-0.06014	0.1028	-0.00308	0.00503	0.1246	-0.1168	0.1587	0.2167	0.1659	-0.03412	DEFB103A_DEFB103B	cluster 3
PRR5	uniprot.P85299_ukb.OID30457_decode.NA	P85299	NA	NA	NA	NA	NA	NA	NA	NA	NA	NA	NA	NA	NA	PRR5	#N/A
XIAP	uniprot.P98170_ukb.OID30490_decode.NA	P98170	-0.1293	0.1278	-0.1278	-0.06138	0.06904	-0.01541	-0.01116	0.04817	-0.08454	0.1001	0.1453	0.1297	0.004118	XIAP	cluster 3
CD83	uniprot.Q01151_ukb.OID20565_decode.5065_8	Q01151	-0.299	0.3207	-0.3207	-0.4656	-0.2831	-0.4412	-0.4299	-0.1232	-0.255	-0.07822	0.1006	0.2068	0.1206	CD83	cluster 6
RELB	uniprot.Q01201_ukb.OID30463_decode.11464_9	Q01201	-0.05347	0.05261	-0.05261	-0.02538	0.02691	-0.008777	-0.003492	-0.02632	0.02763	0.04337	0.02408	-0.01785	0.01059	RELB	cluster 3
IL5RA	uniprot.Q01344_ukb.OID20601_decode.13686_2	Q01344	-0.09508	0.09949	-0.09949	-0.03522	0.06274	0.001568	0.005244	0.05862	0.00355	-0.01101	-0.01427	0.01245	-0.02156	IL5RA	cluster 3
CTBS	uniprot.Q01459_ukb.OID30710_decode.NA	Q01459	-0.1582	0.1632	-0.1632	-0.1164	0.02182	-0.07111	-0.06464	0.06314	-0.07023	0.04417	0.07994	0.1436	-0.0352	CTBS	cluster 3
TNFRSF17	uniprot.Q02223_ukb.OID30589_decode.2665_26	Q02223	-0.07007	0.082	-0.082	-0.1992	-0.1927	-0.2185	-0.2184	-0.02938	-0.06617	-0.04106	0.01301	0.09055	0.1503	TNFRSF17	cluster 2
TOP2B	uniprot.Q02880_ukb.OID30559_decode.NA	Q02880	-0.2245	0.2256	-0.2256	-0.1662	0.03894	-0.1036	-0.0948	-0.02857	-0.1677	0.03654	0.1419	0.1872	0.03532	TOP2B	cluster 2
AKAP12	uniprot.Q02952_ukb.OID30571_decode.NA	Q02952	0.2184	-0.2091	0.2091	-0.007416	-0.2512	-0.1107	-0.1218	-0.1097	0.06512	-0.1769	-0.2018	-0.06775	0.06953	AKAP12	cluster 5
TFF2	uniprot.Q03403_ukb.OID20787_decode.9191_8	Q03403	-0.1085	0.1158	-0.1158	-0.2261	-0.1833	-0.2297	-0.2296	0.03533	-0.05175	0.06491	0.09359	0.1023	0.2014	TFF2	cluster 2
PLAUR	uniprot.Q03405_ukb.OID20764_decode.2652_15	Q03405	-0.2162	0.2296	-0.2296	-0.3528	-0.2251	-0.3361	-0.3289	-0.01534	-0.1684	-0.03741	0.08587	0.1558	0.1093	PLAUR	cluster 2
MVK	uniprot.Q03426_ukb.OID20459_decode.11391_69	Q03426	-0.2236	0.2306	-0.2306	-0.1374	0.07806	-0.05838	-0.04851	0.07095	-0.1995	0.12	0.2304	0.3059	-0.005776	MVK	cluster 2
PTH1R	uniprot.Q03431_ukb.OID20571_decode.13470_43	Q03431	-0.2536	0.2575	-0.2575	-0.2953	-0.1057	-0.245	-0.236	0.04966	-0.1043	0.04799	0.1119	0.1786	0.1269	PTH1R	cluster 2
UBXN1	uniprot.Q04323_ukb.OID30654_decode.NA	Q04323	-0.1852	0.1858	-0.1858	-0.1114	0.05398	-0.05891	-0.05054	0.05167	-0.1056	0.05056	0.1153	0.1264	0.01034	UBXN1	cluster 3
FOLH1	uniprot.Q04609_ukb.OID30430_decode.5478_50	Q04609	-0.007296	0.01357	-0.01357	-0.0181	-0.01421	-0.01591	-0.01737	0.05787	-0.08535	0.014	0.06656	0.1082	-0.07245	FOLH1	cluster 3
EIF4G1	uniprot.Q04637_ukb.OID20625_decode.NA	Q04637	-0.179	0.1807	-0.1807	-0.07511	0.09747	-0.01455	-0.006515	0.06079	-0.1135	0.1477	0.2038	0.1129	-0.006893	EIF4G1	cluster 3
HGFAC	uniprot.Q04756_ukb.OID30718_decode.3617_80	Q04756	0.05714	-0.0526	0.0526	-0.01035	-0.07736	-0.03591	-0.04045	-0.04727	-0.04881	0.01065	0.04184	0.0147	-0.04668	HGFAC	cluster 4
PRKCQ	uniprot.Q04759_ukb.OID20468_decode.3817_18	Q04759	-0.0144	0.01854	-0.01854	0.02154	0.06635	0.04391	0.04655	0.05657	0.067	0.02626	-0.02068	0.0593	-0.01019	PRKCQ	cluster 3
SSBP1	uniprot.Q04837_ukb.OID30468_decode.NA	Q04837	-0.0908	0.09788	-0.09788	-0.3856	-0.3212	-0.3922	-0.3906	0.04541	-0.2113	-0.2117	-0.06904	0.3169	0.1799	SSBP1	cluster 2
ICA1	uniprot.Q05084_ukb.OID20484_decode.NA	Q05084	-0.08747	0.08844	-0.08844	0.01959	0.1249	0.06456	0.06918	0.0534	-0.105	0.1412	0.1962	0.04782	-0.05427	ICA1	cluster 3
GAD2	uniprot.Q05329_ukb.OID30449_decode.NA	Q05329	NA	NA	NA	NA	NA	NA	NA	NA	NA	NA	NA	NA	NA	GAD2	#N/A
SULT2A1	uniprot.Q06520_ukb.OID20508_decode.9829_91	Q06520	-0.2792	0.2885	-0.2885	-0.2923	-0.08003	-0.2341	-0.2231	-0.04062	-0.2017	0.02723	0.1455	0.3515	0.1203	SULT2A1	cluster 2
CKAP4	uniprot.Q07065_ukb.OID20617_decode.7221_56	Q07065	-0.308	0.3263	-0.3263	-0.5791	-0.416	-0.5707	-0.5627	-0.2684	-0.2476	-0.06231	0.1128	0.1637	0.2586	CKAP4	cluster 6
CXCL9	uniprot.Q07325_ukb.OID20675_decode.11593_21	Q07325	-0.239	0.2482	-0.2482	-0.3029	-0.1452	-0.2626	-0.2562	0.03788	-0.1237	-0.006031	0.0776	0.2126	0.07676	CXCL9	cluster 2
PCDH1	uniprot.Q08174_ukb.OID20614_decode.NA	Q08174	-0.1592	0.1719	-0.1719	-0.4185	-0.3787	-0.4394	-0.4387	-0.05247	-0.01437	0.03754	0.03393	0.1283	0.2307	PCDH1	cluster 6
IL10RB	uniprot.Q08334_ukb.OID20696_decode.2631_50	Q08334	-0.373	0.3916	-0.3916	-0.4968	-0.2326	-0.4397	-0.4262	-0.09462	-0.2037	0.0293	0.1655	0.2011	0.1377	IL10RB	cluster 6
LGALS3BP	uniprot.Q08380_ukb.OID30765_decode.5000_52	Q08380	-0.1714	0.1787	-0.1787	-0.1196	0.03964	-0.06556	-0.05592	-0.01895	-0.1072	0.001824	0.07197	0.1917	-0.007892	LGALS3BP	cluster 3
FGL1	uniprot.Q08830_ukb.OID30702_decode.5581_28	Q08830	-0.02644	0.01808	-0.01808	0.06154	0.1106	0.08584	0.09075	0.02958	0.05518	0.01512	-0.03079	-0.06743	-0.01166	FGL1	cluster 3
EP300	uniprot.Q09472_ukb.OID30438_decode.NA	Q09472	-0.1768	0.187	-0.187	-0.2326	-0.09732	-0.1977	-0.1959	0.02133	-0.04985	0.07394	0.1048	0.1555	0.07622	EP300	cluster 2
FABP9	uniprot.Q0Z7S8_ukb.OID20501_decode.18194_18	Q0Z7S8	-0.006023	0.009954	-0.009954	-0.1194	-0.1564	-0.1471	-0.1488	-0.09404	-0.02195	0.0008979	0.02294	0.0006073	0.03386	FABP9	cluster 4
NEXN	uniprot.Q0ZGT2_ukb.OID30678_decode.NA	Q0ZGT2	-0.1085	0.1055	-0.1055	-0.02621	0.08925	0.01927	0.02303	0.005282	-0.04493	0.1149	0.1345	0.004466	0.01126	NEXN	cluster 3
SCRN1	uniprot.Q12765_ukb.OID20542_decode.NA	Q12765	-0.0557	0.05644	-0.05644	-0.04075	0.01645	-0.01941	-0.01764	0.02146	-0.1119	0.08247	0.1497	0.0846	0.04892	SCRN1	cluster 3
FOXO1	uniprot.Q12778_ukb.OID20515_decode.NA	Q12778	-0.08757	0.08855	-0.08855	-0.0003875	0.09031	0.03706	0.04121	0.07937	-0.1125	0.1303	0.1893	0.0816	-0.05547	FOXO1	cluster 3
MERTK	uniprot.Q12866_ukb.OID20657_decode.NA	Q12866	-0.1089	0.1186	-0.1186	-0.216	-0.156	-0.2129	-0.2078	0.02007	-0.01571	0.005897	0.009312	0.09831	0.1436	MERTK	cluster 2
TP53BP1	uniprot.Q12888_ukb.OID30470_decode.NA	Q12888	-0.008935	0.0113	-0.0113	-0.06884	-0.07212	-0.07373	-0.07719	0.08366	0.08765	-0.009869	-0.06977	0.01686	-0.05759	TP53BP1	cluster 4
KLRB1	uniprot.Q12918_ukb.OID20629_decode.10809_14	Q12918	-0.1493	0.1596	-0.1596	-0.2845	-0.2155	-0.2831	-0.2827	-0.09765	-0.08934	0.01707	0.07662	0.12	0.104	KLRB1	cluster 2
TRAF2	uniprot.Q12933_ukb.OID20507_decode.NA	Q12933	-0.1177	0.1203	-0.1203	-0.02988	0.09098	0.01574	0.01996	0.07065	-0.05033	0.1295	0.1315	0.08787	0.0009687	TRAF2	cluster 3
NFATC3	uniprot.Q12968_ukb.OID20470_decode.NA	Q12968	-0.03962	0.05095	-0.05095	-0.08518	-0.06182	-0.08052	-0.08118	0.04115	-0.03692	-0.05165	-0.01487	0.1978	-0.08461	NFATC3	cluster 4
IL24	uniprot.Q13007_ukb.OID20440_decode.3321_2	Q13007	0.04499	-0.01938	0.01938	0.01959	-0.0117	0.006684	0.005252	0.01362	-0.01867	-0.2238	-0.18	0.07401	-0.01702	IL24	cluster 4
TRAF3	uniprot.Q13114-2_ukb.OID30479_decode.NA	Q13114-2	0.01954	-0.02139	0.02139	-0.06206	-0.09965	-0.08134	-0.08536	0.01356	-0.1158	-0.05407	0.02984	0.08972	0.07024	TRAF3	cluster 4
STX5	uniprot.Q13190_ukb.OID30432_decode.NA	Q13190	-0.2243	0.2315	-0.2315	-0.07936	0.1376	-0.007276	0.004892	0.1017	0.001799	0.1609	0.1314	-0.00476	-0.0792	STX5	cluster 2
PAPPA	uniprot.Q13219_ukb.OID20421_decode.4148_49	Q13219	-0.08726	0.09114	-0.09114	-0.0979	-0.03799	-0.08709	-0.08615	-0.06234	-0.01118	-0.04543	-0.03049	-0.06911	-0.08082	PAPPA	cluster 2
NME3	uniprot.Q13232_ukb.OID20789_decode.NA	Q13232	0.0833	-0.07652	0.07652	-0.01369	-0.1147	-0.05586	-0.06045	-0.006628	-0.1008	-0.1011	-0.01697	-0.00244	-0.04101	NME3	cluster 4
KLRD1	uniprot.Q13241_ukb.OID20632_decode.NA	Q13241	-0.2484	0.2617	-0.2617	-0.3265	-0.1595	-0.2908	-0.2818	-0.06128	-0.1799	-0.01389	0.1027	0.2157	0.09837	KLRD1	cluster 2
IL15RA	uniprot.Q13261_ukb.OID20498_decode.14054_17	Q13261	-0.2766	0.3048	-0.3048	-0.5866	-0.476	-0.5978	-0.596	-0.1522	-0.2047	-0.06872	0.07768	0.1206	0.2253	IL15RA	cluster 6
SLAMF1	uniprot.Q13291_ukb.OID20496_decode.7953_20	Q13291	-0.2102	0.2336	-0.2336	-0.3691	-0.255	-0.3557	-0.3503	-0.01935	-0.2626	-0.08437	0.112	0.2325	0.1423	SLAMF1	cluster 6
MYO9B	uniprot.Q13459_ukb.OID20451_decode.NA	Q13459	-0.0734	0.07623	-0.07623	-0.02832	0.04384	-0.005783	-0.00366	0.1097	-0.05089	0.1403	0.1547	0.003011	-0.1134	MYO9B	cluster 3
IL18R1	uniprot.Q13478_ukb.OID20652_decode.14079_14	Q13478	-0.2166	0.222	-0.222	-0.1824	0.002196	-0.1257	-0.1159	-0.004909	-0.1655	0.049	0.1548	0.1684	-0.02358	IL18R1	cluster 2
EIF4EBP2	uniprot.Q13542_ukb.NA_decode.4184_43	Q13542	0.1002	-0.09559	0.09559	0.1209	0.05367	0.103	0.1031	0.02861	0.1558	-0.1252	-0.2216	-0.1512	-0.1078	EIF4EBP2	cluster 5
DGKZ	uniprot.Q13574_ukb.OID20466_decode.NA	Q13574	-0.02566	0.01981	-0.01981	0.04395	0.09773	0.0732	0.07462	0.1221	-0.3274	-0.02617	0.2049	0.01241	-0.03441	DGKZ	cluster 2
IL10RA	uniprot.Q13651_ukb.OID20420_decode.10344_334	Q13651	-0.1955	0.1995	-0.1995	-0.2604	-0.1173	-0.2334	-0.2247	-0.1021	-0.1125	0.01748	0.09823	0.1732	0.0408	IL10RA	cluster 2
APOF	uniprot.Q13790_ukb.OID30701_decode.12370_30	Q13790	0.1806	-0.1847	0.1847	0.125	-0.03832	0.06889	0.06215	0.02604	0.1863	-0.05658	-0.1786	-0.2406	-0.0171	APOF	cluster 5
PRKG1	uniprot.Q13976_ukb.OID30621_decode.13067_5	Q13976	-0.06847	0.06565	-0.06565	0.03504	0.1327	0.07784	0.08394	0.0785	-0.02153	0.09525	0.093	0.0471	0.04095	PRKG1	cluster 3
IL16	uniprot.Q14005_ukb.OID20633_decode.2774_10	Q14005	-0.3529	0.3664	-0.3664	-0.4687	-0.2168	-0.4175	-0.4069	0.02713	-0.1579	0.04982	0.1549	0.2772	0.2033	IL16	cluster 6
IL18	uniprot.Q14116_ukb.OID20694_decode.5661_15	Q14116	-0.2491	0.2596	-0.2596	-0.2432	-0.05402	-0.1933	-0.183	0.01824	-0.1673	0.1024	0.2036	0.1887	0.08763	IL18	cluster 2
DAG1	uniprot.Q14118_ukb.OID20774_decode.8369_102	Q14118	-0.1312	0.1441	-0.1441	-0.03842	0.0922	0.01127	0.01801	0.06789	-0.09595	0.02102	0.08341	0.05993	-0.02524	DAG1	cluster 3
LY6D	uniprot.Q14210_ukb.OID20708_decode.NA	Q14210	-0.1977	0.217	-0.217	-0.454	-0.3838	-0.4701	-0.4677	-0.09408	-0.1936	0.002423	0.1335	0.2196	0.2497	LY6D	cluster 6
SELPLG	uniprot.Q14242_ukb.OID20560_decode.11266_8	Q14242	0.01513	-0.007404	0.007404	-0.01359	-0.03562	-0.02144	-0.02341	-0.03497	-0.09263	0.02703	0.0916	0.1352	0.00661	SELPLG	cluster 3
GALNT3	uniprot.Q14435_ukb.OID20471_decode.6593_5	Q14435	-0.04579	0.04976	-0.04976	-0.05799	-0.02374	-0.04902	-0.04687	0.05436	-0.04364	0.04265	0.06493	0.01001	0.01437	GALNT3	cluster 3
NEDD9	uniprot.Q14511_ukb.OID30503_decode.12862_14	Q14511	-0.1919	0.1821	-0.1821	-0.1289	0.07124	-0.07228	-0.0571	-0.02847	-0.191	0.02762	0.1584	0.1344	-0.00561	NEDD9	cluster 3
ITIH4	uniprot.Q14624_ukb.OID30762_decode.4811_33	Q14624	-0.06398	0.05877	-0.05877	-0.00216	0.07607	0.02449	0.03101	-0.02537	-0.1263	0.03563	0.1165	0.06773	0.009023	ITIH4	cluster 3
ICAM4	uniprot.Q14773_ukb.OID20578_decode.6550_4	Q14773	0.006825	-0.004571	0.004571	-0.03482	-0.05495	-0.04892	-0.04902	0.04824	0.004719	-0.08456	-0.07984	-0.06753	-0.04595	ICAM4	cluster 4
AGER	uniprot.Q15109_ukb.OID20756_decode.4125_52	Q15109	0.07701	-0.07029	0.07029	-0.04866	-0.1513	-0.0932	-0.09941	-0.04072	-0.007889	-0.06813	-0.05544	-0.1186	0.04206	AGER	cluster 4
PON3	uniprot.Q15166_ukb.OID20777_decode.NA	Q15166	0.2876	-0.2944	0.2944	0.2833	0.04844	0.218	0.206	0.09397	0.2552	-0.0133	-0.1845	-0.3348	-0.1042	PON3	cluster 5
NECTIN1	uniprot.Q15223_ukb.OID30545_decode.8803_61	Q15223	-0.3057	0.3092	-0.3092	-0.1614	0.1426	-0.06035	-0.03663	0.05281	-0.1848	-0.1086	0.04747	-0.00561	-0.2014	NECTIN1	cluster 2
RABEP1	uniprot.Q15276_ukb.OID30647_decode.NA	Q15276	-0.1154	0.1134	-0.1134	-0.03647	0.07733	0.00357	0.009261	0.03732	-0.08192	0.06038	0.1078	0.07195	-0.0163	RABEP1	cluster 3
ANGPT1	uniprot.Q15389_ukb.OID20740_decode.2811_27	Q15389	-0.04765	0.04807	-0.04807	-0.01236	0.03882	0.003834	0.005467	0.04525	-0.02877	0.004497	0.02202	-0.03067	-0.02471	ANGPT1	cluster 3
TLR1_1	uniprot.Q15399_ukb.OID30532_decode.16324_38	Q15399	-0.178	0.1797	-0.1797	-0.1759	-0.03523	-0.137	-0.1308	-0.05791	-0.01857	0.02806	0.04098	0.08654	0.007852	TLR1	cluster 2
SHH	uniprot.Q15465_ukb.OID30516_decode.2743_5	Q15465	0.5604	-0.5654	0.5654	0.4982	0.0518	0.3851	0.3531	0.1537	0.2254	-0.07077	-0.2219	-0.2483	0.01937	SHH	cluster 2
CDSN	uniprot.Q15517_ukb.OID20667_decode.7085_81	Q15517	-0.1269	0.1384	-0.1384	-0.2907	-0.244	-0.3014	-0.2994	-0.06015	-0.05493	0.01176	0.04738	0.1012	0.1846	CDSN	cluster 2
TPSAB1	uniprot.Q15661_ukb.OID20642_decode.9409_11	Q15661	-0.3312	0.3538	-0.3538	-0.5716	-0.4079	-0.577	-0.5673	-0.2346	-0.1496	-0.15	-0.0201	0.02598	0.1287	TPSAB1	cluster 6
ZNF174	uniprot.Q15697_ukb.OID30508_decode.11486_26	Q15697	0.01014	-0.01862	0.01863	-0.004789	0.005483	-0.01014	-0.01548	-0.05491	-0.1292	0.03813	0.1338	0.01979	-0.1328	ZNF174	cluster 4
CD226	uniprot.Q15762_ukb.OID30556_decode.5062_60	Q15762	-0.09007	0.09032	-0.09032	-0.03306	0.05594	-0.002044	0.0009215	0.05071	-0.04226	0.04259	0.06298	0.01377	-0.02298	CD226	cluster 3
ADIPOQ	uniprot.Q15848_ukb.OID30748_decode.3554_24	Q15848	0.1928	-0.199	0.199	0.1584	-0.005746	0.1069	0.1003	0.05854	0.1688	-0.02963	-0.1416	-0.332	-0.03607	ADIPOQ	cluster 5
LAMA4	uniprot.Q16363_ukb.OID20769_decode.6577_64	Q16363	-0.1014	0.1071	-0.1071	-0.1714	-0.1052	-0.163	-0.1602	-0.05397	-0.1491	-0.02999	0.071	0.09302	0.1098	LAMA4	cluster 2
PRR4	uniprot.Q16378_ukb.OID30607_decode.NA	Q16378	0.0165	-0.0129	0.0129	-0.08284	-0.1302	-0.1129	-0.1176	-0.008902	-0.09573	0.06075	0.1222	-0.08711	0.05218	PRR4	cluster 4
IL17A	uniprot.Q16552_ukb.OID20469_decode.9170_24	Q16552	0.004877	0.004847	-0.004847	0.0003754	-0.007791	0.0007125	0.0003159	0.1281	-0.052	0.01655	0.04667	0.03762	0.04995	IL17A	cluster 3
ECM1	uniprot.Q16610_ukb.OID30736_decode.3366_51	Q16610	0.08736	-0.08584	0.08584	0.02679	-0.05603	-0.003203	-0.007348	-0.03556	-0.04319	-0.0986	-0.05965	-0.06895	-0.005867	ECM1	cluster 4
DBN1	uniprot.Q16643_ukb.OID30549_decode.NA	Q16643	-0.1485	0.151	-0.151	-0.1604	-0.04559	-0.1295	-0.1261	0.05345	-0.06142	0.1006	0.1312	0.06167	0.04725	DBN1	cluster 2
PRSS8	uniprot.Q16651_ukb.OID20763_decode.15513_108	Q16651	-0.2143	0.2234	-0.2234	-0.2302	-0.0598	-0.1837	-0.175	-0.04331	-0.1959	0.07613	0.2001	0.3135	0.06376	PRSS8	cluster 2
CCL15	uniprot.Q16663_ukb.NA_decode.18289_16	Q16663	-0.02992	0.04033	-0.04033	-0.2571	-0.3234	-0.315	-0.3207	-0.09806	0.03449	0.02291	-0.01289	0.1606	0.2434	CCL15	cluster 2
HIF1A	uniprot.Q16665_ukb.OID30425_decode.13089_6	Q16665	-0.1856	0.1859	-0.1859	-0.1659	-0.01706	-0.1255	-0.1192	-0.02137	-0.1115	-0.01785	0.06683	0.04359	0.01874	HIF1A	cluster 2
DECR1	uniprot.Q16698_ukb.OID20579_decode.12687_2	Q16698	-0.07128	0.07409	-0.07409	-0.01296	0.06452	0.01688	0.02041	0.05999	-0.006113	0.1521	0.1359	0.02624	0.01509	DECR1	cluster 3
NDUFA5	uniprot.Q16718_ukb.OID30520_decode.19200_16	Q16718	-0.1362	0.1345	-0.1345	-0.08915	0.04377	-0.04044	-0.03854	0.08327	-0.2967	0.09478	0.2879	0.2192	0.01134	NDUFA5	cluster 2
KYNU	uniprot.Q16719_ukb.OID20669_decode.4559_64	Q16719	-0.2324	0.2389	-0.2389	-0.1736	0.02379	-0.1116	-0.1007	-0.01594	-0.1531	0.05118	0.1451	0.2593	0.01831	KYNU	cluster 2
MICB_MICA	uniprot.Q29980_Q29983_ukb.OID20593_decode.NA	Q29980_Q29983	NA	NA	NA	NA	NA	NA	NA	NA	NA	NA	NA	NA	NA	MICB_MICA	#N/A
CEACAM21	uniprot.Q3KPI0_ukb.OID20548_decode.7204_1	Q3KPI0	-0.4739	0.5004	-0.5004	-0.7029	-0.3872	-0.6514	-0.6396	-0.1898	-0.3384	-0.1279	0.123	0.2898	0.3055	CEACAM21	cluster 6
CDON	uniprot.Q4KMG0_ukb.OID20754_decode.4541_49	Q4KMG0	-0.01417	0.01706	-0.01706	-0.03379	-0.03065	-0.03343	-0.03313	0.05819	-0.008604	0.01788	0.02068	0.01799	-0.00314	CDON	cluster 3
AMOT	uniprot.Q4VCS5_ukb.OID30572_decode.NA	Q4VCS5	-0.2045	0.2117	-0.2117	-0.2104	-0.05139	-0.1647	-0.1579	-0.1599	-0.2466	-0.04664	0.1279	0.2408	0.04501	AMOT	cluster 2
TP53I3	uniprot.Q53FA7_ukb.OID30632_decode.17748_21	Q53FA7	-0.08788	0.08871	-0.08871	-0.05511	0.02874	-0.02512	-0.02169	0.03662	-0.08939	0.005491	0.06466	0.06961	-0.006953	TP53I3	cluster 3
SDK2	uniprot.Q58EX2_ukb.OID30662_decode.NA	Q58EX2	-0.1436	0.1606	-0.1606	-0.2666	-0.2018	-0.2641	-0.2617	0.07203	-0.1908	-0.1931	-0.04948	0.1393	-0.03097	SDK2	cluster 2
NHLRC3	uniprot.Q5JS37_ukb.OID30614_decode.9087_8	Q5JS37	-0.1833	0.1929	-0.1929	-0.141	0.01397	-0.09676	-0.08615	0.05688	-0.2312	-0.03413	0.134	0.2698	-0.05698	NHLRC3	cluster 2
PSMG4	uniprot.Q5JS54_ukb.OID30514_decode.NA	Q5JS54	-0.2695	0.2666	-0.2666	-0.2978	-0.08842	-0.244	-0.2341	-0.1664	-0.1874	-0.161	-0.02195	0.09104	0.03172	PSMG4	cluster 2
COLEC12	uniprot.Q5KU26_ukb.OID20738_decode.5457_5	Q5KU26	-0.246	0.2731	-0.2731	-0.5867	-0.4965	-0.6054	-0.6041	-0.2227	-0.282	-0.05303	0.1439	0.184	0.3442	COLEC12	cluster 6
CLEC12A	uniprot.Q5QGZ9_ukb.OID30552_decode.11187_11	Q5QGZ9	-0.1895	0.2017	-0.2017	-0.2774	-0.1559	-0.2556	-0.2493	-0.0156	-0.2814	-0.006225	0.1942	0.1416	0.05337	CLEC12A	cluster 2
RABGAP1L	uniprot.Q5R372_ukb.OID20447_decode.NA	Q5R372	-0.09932	0.09954	-0.09954	-0.04745	0.04437	-0.01478	-0.01138	0.01793	-0.1583	0.05486	0.1563	0.1133	-0.04984	RABGAP1L	cluster 3
PDZK1	uniprot.Q5T2W1_ukb.OID30550_decode.16852_10	Q5T2W1	-0.2475	0.2537	-0.2537	-0.2539	-0.04024	-0.1984	-0.1849	0.007201	-0.2197	0.1044	0.2398	0.3615	0.1323	PDZK1	cluster 2
ARTN	uniprot.Q5T4W7_ukb.OID20446_decode.2939_10	Q5T4W7	0.07698	-0.07056	0.07056	0.06055	-0.000697	0.04856	0.05086	-0.09279	-0.09344	-0.141	-0.06019	0.06951	0.02296	ARTN	cluster 4
BCL2L15	uniprot.Q5TBC7_ukb.OID30498_decode.NA	Q5TBC7	-0.253	0.2551	-0.2551	-0.3338	-0.1435	-0.3001	-0.2896	-0.05978	-0.1703	0.02231	0.1297	0.1699	0.1097	BCL2L15	cluster 2
DDI2	uniprot.Q5TDH0_ukb.OID30602_decode.NA	Q5TDH0	-0.1082	0.09543	-0.09543	-0.01807	0.09	0.02497	0.03202	-0.07277	0.0425	-0.2952	-0.2907	0.0009404	-0.02173	DDI2	cluster 4
MYOM3	uniprot.Q5VTT5_ukb.OID30633_decode.13966_30	Q5VTT5	0.1243	-0.1196	0.1196	-0.01713	-0.1728	-0.08279	-0.09157	-0.02013	0.02397	-0.07205	-0.08279	0.0412	0.06994	MYOM3	cluster 4
CD276	uniprot.Q5ZPR3_ukb.OID20680_decode.NA	Q5ZPR3	-0.01032	0.0244	-0.0244	-0.225	-0.2791	-0.2638	-0.2712	-0.05906	-0.1486	-0.1042	0.01082	-0.0009638	0.04688	CD276	cluster 2
IGFL4	uniprot.Q6B9Z1_ukb.OID30500_decode.NA	Q6B9Z1	0.004173	0.01449	-0.01449	-0.04005	-0.06481	-0.04519	-0.04449	-0.1658	-0.09128	-0.2215	-0.1295	-0.037	-0.1554	IGFL4	cluster 4
FCRL6	uniprot.Q6DN72_ukb.OID20529_decode.6617_12	Q6DN72	-0.3608	0.3707	-0.3707	-0.4238	-0.1581	-0.3559	-0.3444	-0.1394	-0.173	0.1596	0.2525	0.1956	0.1276	FCRL6	cluster 6
IL31	uniprot.Q6EBC2_ukb.OID30487_decode.10455_196	Q6EBC2	-0.08812	0.08468	-0.08468	-0.01825	0.08083	0.01957	0.02694	0.0112	-0.09471	-0.05482	0.01246	0.003608	0.02859	IL31	cluster 3
SFRP4	uniprot.Q6FHJ7_ukb.OID30648_decode.17447_52	Q6FHJ7	-0.09549	0.1085	-0.1085	-0.2351	-0.201	-0.2449	-0.2451	-0.03465	-0.09815	-0.03444	0.03778	0.1353	0.09704	SFRP4	cluster 2
PTRHD1	uniprot.Q6GMV3_ukb.OID30659_decode.NA	Q6GMV3	-0.1227	0.1233	-0.1233	-0.04401	0.07922	0.001915	0.006309	0.05453	-0.0821	0.0529	0.1004	0.07228	0.007316	PTRHD1	cluster 3
LAIR1	uniprot.Q6GTX8_ukb.OID20737_decode.11284_24	Q6GTX8	-0.5617	0.5861	-0.5861	-0.7643	-0.3824	-0.6852	-0.6669	-0.2265	-0.4365	-0.09365	0.214	0.3524	0.3468	LAIR1	cluster 6
TNFAIP8L2	uniprot.Q6P589_ukb.OID30629_decode.NA	Q6P589	-0.08934	0.08998	-0.08998	-0.00823	0.08711	0.02776	0.03307	0.07	-0.08946	0.08815	0.1423	0.0972	-0.01555	TNFAIP8L2	cluster 3
LEG1	uniprot.Q6P5S2_ukb.OID30608_decode.7154_92	Q6P5S2	0.05045	-0.05379	0.05379	0.05034	0.006527	0.03684	0.03545	0.07269	0.003147	0.01206	0.009047	-0.1057	-0.134	LEG1	cluster 4
ADGRD1	uniprot.Q6QNK2_ukb.OID30588_decode.NA	Q6QNK2	-0.07808	0.08249	-0.08249	-0.05259	0.02502	-0.02942	-0.02375	0.03461	-0.0681	0.03307	0.07152	0.2926	0.06328	ADGRD1	cluster 3
RICTOR	uniprot.Q6R327_ukb.OID30433_decode.NA	Q6R327	0.006795	-0.004687	0.004687	-0.07247	-0.09171	-0.08736	-0.09562	-0.1458	-0.299	-0.1662	0.05625	0.04091	0.06297	RICTOR	cluster 4
METAP1D	uniprot.Q6UB28_ukb.OID20519_decode.NA	Q6UB28	-0.15	0.155	-0.155	-0.06218	0.08439	-0.009607	-0.003004	0.03541	-0.1259	0.1103	0.1814	0.07607	0.009437	METAP1D	cluster 3
ENPP7	uniprot.Q6UWV6_ukb.OID20689_decode.4435_66	Q6UWV6	NA	NA	NA	NA	NA	NA	NA	NA	NA	NA	NA	NA	NA	ENPP7	#N/A
OLFM4	uniprot.Q6UX06_ukb.OID30665_decode.4769_10	Q6UX06	-0.07737	0.07831	-0.07831	-0.03883	0.02394	-0.02066	-0.01494	-0.00999	-0.06065	-0.03428	0.009127	0.03526	-0.01122	OLFM4	cluster 3
CXCL17	uniprot.Q6UXB2_ukb.OID20622_decode.9495_10	Q6UXB2	-0.2442	0.2511	-0.2511	-0.2377	-0.0357	-0.1789	-0.1662	0.01439	-0.05687	0.08836	0.1198	0.1488	0.0685	CXCL17	cluster 2
CLEC4G	uniprot.Q6UXB4_ukb.OID20590_decode.10781_19	Q6UXB4	-0.2077	0.2222	-0.2222	-0.3159	-0.1819	-0.2951	-0.2882	-0.0652	-0.181	0.008523	0.1153	0.2901	0.2229	CLEC4G	cluster 2
PI16	uniprot.Q6UXB8_ukb.OID30676_decode.NA	Q6UXB8	-0.0425	0.04776	-0.04776	-0.1817	-0.1911	-0.2061	-0.2074	-0.09676	-0.08473	-0.02664	0.03776	-0.05499	0.0845	PI16	cluster 4
CRELD2	uniprot.Q6UXH1_ukb.OID20751_decode.NA	Q6UXH1	-0.2048	0.2145	-0.2145	-0.2272	-0.06826	-0.1865	-0.1777	-0.04824	-0.181	0.08801	0.2014	0.1358	0.07389	CRELD2	cluster 2
LRRN1	uniprot.Q6UXK5_ukb.OID20438_decode.11293_14	Q6UXK5	0.256	-0.2476	0.2476	0.06471	-0.1994	-0.02933	-0.04581	-0.07006	-0.009962	-0.1235	-0.0955	-0.04684	0.01636	LRRN1	cluster 5
IL20RB	uniprot.Q6UXL0_ukb.OID30461_decode.13435_31	Q6UXL0	0.03844	-0.04079	0.04079	-0.07774	-0.1554	-0.1143	-0.1182	-0.07291	0.04667	-0.151	-0.1655	-0.03676	0.0194	IL20RB	cluster 4
LRIG3	uniprot.Q6UXM1_ukb.OID30450_decode.3322_52	Q6UXM1	-0.05584	0.06027	-0.06027	-0.115	-0.0959	-0.1161	-0.118	-0.06076	-0.1324	0.0311	0.1244	0.06718	0.03749	LRIG3	cluster 4
UNC5D	uniprot.Q6UXZ4_ukb.OID30447_decode.16307_22	Q6UXZ4	0.1098	-0.0983	0.0983	-0.12	-0.2754	-0.1963	-0.207	-0.03621	0.0521	-0.05783	-0.08077	-0.1248	0.07764	UNC5D	cluster 4
SLC39A5	uniprot.Q6ZMH5_ukb.OID20539_decode.NA	Q6ZMH5	-0.2789	0.2966	-0.2966	-0.4099	-0.2329	-0.3777	-0.3692	-0.178	-0.249	0.007109	0.1736	0.3715	0.2718	SLC39A5	cluster 6
PIK3AP1	uniprot.Q6ZUJ8_ukb.OID20587_decode.NA	Q6ZUJ8	-0.1197	0.1175	-0.1175	-0.0904	0.008698	-0.0607	-0.05655	0.01992	-0.0332	0.06087	0.06589	0.0721	0.03039	PIK3AP1	cluster 3
BTN2A1	uniprot.Q7KYR7_ukb.OID20713_decode.8869_5	Q7KYR7	-0.2584	0.2823	-0.2823	-0.5136	-0.3876	-0.5157	-0.5109	-0.108	-0.2241	-0.1093	0.0531	0.07486	0.1723	BTN2A1	cluster 6
VASH1	uniprot.Q7L8A9_ukb.OID20516_decode.NA	Q7L8A9	-0.1007	0.1025	-0.1025	-0.02271	0.08159	0.01955	0.02297	0.03188	-0.1101	0.09061	0.1478	0.1192	-0.003023	VASH1	cluster 3
C1QL2	uniprot.Q7Z5L3_ukb.OID30515_decode.15670_15	Q7Z5L3	-0.05852	0.05863	-0.05863	-0.03187	0.01902	-0.01583	-0.01198	0.03975	-0.008988	-0.02674	-0.02063	0.006612	-0.03536	C1QL2	cluster 3
SPRED2	uniprot.Q7Z698_ukb.OID30423_decode.NA	Q7Z698	-0.01344	0.01482	-0.01482	0.009518	0.01962	0.01721	0.01519	0.06339	-0.05661	0.05575	0.09692	-0.04671	-0.07509	SPRED2	cluster 3
MILR1	uniprot.Q7Z6M3_ukb.OID20482_decode.11173_29	Q7Z6M3	-0.01368	0.02033	-0.02033	-0.1151	-0.1202	-0.128	-0.1307	0.02891	-0.03486	-0.07761	-0.04298	-0.03281	-0.01544	MILR1	cluster 4
YTHDF3	uniprot.Q7Z739_ukb.OID20478_decode.NA	Q7Z739	-0.1274	0.1333	-0.1333	-0.08165	0.04117	-0.03813	-0.03457	0.01767	-0.1595	0.1228	0.2183	0.195	0.07544	YTHDF3	cluster 3
GLRX5	uniprot.Q86SX6_ukb.OID30663_decode.16597_11	Q86SX6	-0.2118	0.2154	-0.2154	-0.1267	0.06953	-0.06673	-0.05465	0.06532	-0.1207	0.1266	0.1918	0.1481	-0.01504	GLRX5	cluster 3
MTDH	uniprot.Q86UE4_ukb.OID30538_decode.NA	Q86UE4	-0.1742	0.1775	-0.1775	-0.1074	0.05651	-0.05041	-0.04325	0.03415	-0.1633	0.0901	0.1893	0.1901	0.008443	MTDH	cluster 3
TREML1	uniprot.Q86YW5_ukb.OID30682_decode.11147_17	Q86YW5	-0.03518	0.03507	-0.03507	0.02382	0.07265	0.04275	0.04592	0.04382	-0.03385	0.02608	0.0456	-0.02899	-0.03395	TREML1	cluster 3
IFNLR1	uniprot.Q8IU57_ukb.OID20506_decode.7192_37	Q8IU57	-0.2804	0.2975	-0.2975	-0.3653	-0.1769	-0.3282	-0.3178	-0.08697	-0.2086	-0.08821	0.06763	0.2978	0.08805	IFNLR1	cluster 6
PHYKPL	uniprot.Q8IUZ5_ukb.OID30634_decode.NA	Q8IUZ5	-0.1328	0.1385	-0.1385	-0.06583	0.05615	-0.02497	-0.01912	0.08182	-0.1124	0.05891	0.1275	0.1797	-0.07082	PHYKPL	cluster 3
ANKMY2	uniprot.Q8IV38_ukb.OID30518_decode.NA	Q8IV38	-0.1076	0.1093	-0.1093	-0.06258	0.03911	-0.02366	-0.02218	0.04927	-0.09347	0.09097	0.1434	0.0745	0.01984	ANKMY2	cluster 3
SAMD9L	uniprot.Q8IVG5_ukb.OID20536_decode.NA	Q8IVG5	-0.1305	0.1341	-0.1341	-0.0503	0.07786	-0.005254	9.34e-06	0.06387	-0.1023	0.09796	0.1519	0.09345	0.02285	SAMD9L	cluster 3
MCEMP1	uniprot.Q8IX19_ukb.OID30501_decode.6283_60	Q8IX19	-0.1805	0.1802	-0.1802	-0.1622	-0.01619	-0.1185	-0.1105	-0.02052	-0.1157	0.1068	0.1775	0.1491	0.1454	MCEMP1	cluster 2
SIRT2	uniprot.Q8IXJ6_ukb.OID21375_decode.5030_52	Q8IXJ6	-0.1086	0.1096	-0.1096	0.00888	0.135	0.06414	0.0692	0.03398	-0.06749	0.107	0.1417	0.04287	-0.05633	SIRT2	cluster 3
OSCAR	uniprot.Q8IYS5_ukb.OID20776_decode.7116_31	Q8IYS5	-0.9323	0.9808	-0.9808	-1.161	-0.4892	-1.014	-0.9776	-0.1336	-0.49	-0.342	0.03441	0.2637	0.2536	OSCAR	cluster 1
RNF168	uniprot.Q8IYW5_ukb.OID30506_decode.NA	Q8IYW5	-0.04421	0.05743	-0.05743	-0.1292	-0.1402	-0.1417	-0.1501	0.02642	-0.1787	-0.02799	0.08799	-0.05101	0.01662	RNF168	cluster 4
SPART	uniprot.Q8N0X7_ukb.OID30656_decode.11161_5	Q8N0X7	-0.07233	0.06992	-0.06992	-0.0158	0.06756	0.01707	0.02055	0.09975	-0.02878	0.07129	0.07782	0.05945	-0.002533	SPART	cluster 3
AFAP1	uniprot.Q8N556_ukb.OID30569_decode.NA	Q8N556	-0.1172	0.1125	-0.1125	-0.08084	-0.004762	-0.0513	-0.04568	-0.09542	-0.1265	-0.08395	0.01913	0.286	0.01215	AFAP1	cluster 2
DPP10	uniprot.Q8N608_ukb.OID20527_decode.7890_68	Q8N608	0.04238	-0.0395	0.0395	0.07019	0.04209	0.06674	0.06978	0.05548	0.02336	-0.04969	-0.06099	-0.04463	-0.06136	DPP10	cluster 4
IL22RA1	uniprot.Q8N6P7_ukb.OID20449_decode.3620_67	Q8N6P7	-0.2386	0.2371	-0.2371	-0.1318	0.1062	-0.04845	-0.03674	0.1922	0.2138	0.1846	0.01411	-0.01082	0.0416	IL22RA1	cluster 2
ENAH	uniprot.Q8N8S7_ukb.OID20497_decode.9757_29	Q8N8S7	-0.1561	0.167	-0.167	-0.2237	-0.1053	-0.1941	-0.1926	-0.001605	-0.05663	0.06137	0.0925	0.1615	0.1122	ENAH	cluster 2
BMPER	uniprot.Q8N8U9_ukb.OID30615_decode.15368_3	Q8N8U9	-0.1422	0.1553	-0.1553	-0.2479	-0.1748	-0.2449	-0.2429	-0.02108	-0.1827	-0.02759	0.1086	0.1973	0.03287	BMPER	cluster 2
DAND5	uniprot.Q8N907_ukb.OID30420_decode.NA	Q8N907	NA	NA	NA	NA	NA	NA	NA	NA	NA	NA	NA	NA	NA	DAND5	#N/A
SUMF1	uniprot.Q8NBK3_ukb.OID30486_decode.6941_11	Q8NBK3	-0.1434	0.1491	-0.1491	-0.2742	-0.2084	-0.2802	-0.2769	0.1131	0.05998	0.01798	-0.0231	0.08116	0.07902	SUMF1	cluster 2
HMCN2	uniprot.Q8NDA2_ukb.OID30592_decode.NA	Q8NDA2	NA	NA	NA	NA	NA	NA	NA	NA	NA	NA	NA	NA	NA	HMCN2	#N/A
BANK1	uniprot.Q8NDB2_ukb.OID20594_decode.NA	Q8NDB2	-0.0924	0.09241	-0.09241	0.0143	0.1207	0.0567	0.06226	0.03931	-0.1289	0.1199	0.189	0.09258	-0.04681	BANK1	cluster 3
APPL2	uniprot.Q8NEU8_ukb.OID30590_decode.NA	Q8NEU8	-0.05296	0.05095	-0.05095	0.03153	0.09875	0.0611	0.06349	0.09624	-0.01766	0.09897	0.1003	0.01437	-0.0394	APPL2	cluster 3
DNER_1	uniprot.Q8NFT8_ukb.OID20712_decode.9769_48	Q8NFT8	0.3153	-0.3182	0.3182	0.2761	0.01282	0.1964	0.1831	0.1089	0.146	-0.02504	-0.1193	-0.2423	-0.1243	DNER	cluster 5
LILRB4	uniprot.Q8NHJ6_ukb.OID20429_decode.6453_70	Q8NHJ6	-0.3381	0.3507	-0.3507	-0.446	-0.2017	-0.3915	-0.381	-0.0434	-0.2429	-0.06506	0.103	0.1979	0.1615	LILRB4	cluster 6
AKR7L	uniprot.Q8NHP1_ukb.OID30488_decode.NA	Q8NHP1	-0.1196	0.1248	-0.1248	-0.12	-0.02372	-0.09727	-0.09308	0.01477	-0.1108	0.05532	0.1285	0.2045	0.02998	AKR7L	cluster 2
GIMAP7	uniprot.Q8NHV1_ukb.OID30639_decode.NA	Q8NHV1	0.07354	-0.07597	0.07597	0.04025	-0.0297	0.01165	0.01013	0.07347	0.04183	-0.05922	-0.08032	-0.02739	-0.03818	GIMAP7	cluster 4
IL31RA	uniprot.Q8NI17_ukb.OID30475_decode.8273_84	Q8NI17	-0.01687	0.02042	-0.02042	-0.02793	-0.02442	-0.04024	-0.03723	-0.01404	0.06651	0.02516	-0.01447	0.09243	0.009337	IL31RA	cluster 4
IL17D	uniprot.Q8TAD2_ukb.OID20481_decode.4136_40	Q8TAD2	-0.1016	0.1116	-0.1116	-0.2057	-0.1518	-0.2013	-0.1977	-0.07281	-0.1227	-0.02433	0.06773	0.05628	0.09918	IL17D	cluster 2
PNPT1	uniprot.Q8TCS8_ukb.OID20445_decode.NA	Q8TCS8	-0.02065	0.02461	-0.02461	-0.005299	0.01933	0.004327	0.007825	-0.03287	-0.03827	0.0791	0.1054	-0.07972	-0.00824	PNPT1	cluster 3
CD200R1	uniprot.Q8TD46_ukb.OID20595_decode.5103_30	Q8TD46	-0.04681	0.0518	-0.0518	-0.096	-0.07402	-0.09657	-0.09486	0.0742	-0.03982	-0.0104	0.01572	-0.006612	0.007803	CD200R1	cluster 4
GNPDA2	uniprot.Q8TDQ7_ukb.OID30597_decode.NA	Q8TDQ7	0.04439	-0.04866	0.04866	0.1107	0.09889	0.1168	0.1155	0.0639	0.03609	0.05063	0.02141	-0.01481	-0.04282	GNPDA2	cluster 3
DTD1	uniprot.Q8TEA8_ukb.OID30580_decode.19194_9	Q8TEA8	0.00405	-0.004498	0.004498	0.02911	0.03385	0.03574	0.03459	0.0314	-0.02498	0.03665	0.04749	0.01339	-0.01028	DTD1	cluster 3
WFIKKN2	uniprot.Q8TEU8_ukb.OID20785_decode.3235_50	Q8TEU8	0.2874	-0.2859	0.2859	0.1305	-0.1393	0.03118	0.01678	0.05166	0.1704	-0.02056	-0.1288	-0.296	-0.0191	WFIKKN2	cluster 5
CLEC4C	uniprot.Q8WTT0_ukb.OID20547_decode.9094_5	Q8WTT0	-0.2307	0.2445	-0.2445	-0.3361	-0.2059	-0.3165	-0.3099	0.01684	-0.04123	-0.0177	0.004657	0.07183	0.08179	CLEC4C	cluster 2
MZB1	uniprot.Q8WU39_ukb.OID20732_decode.16322_10	Q8WU39	-0.2366	0.2467	-0.2467	-0.2632	-0.08925	-0.2218	-0.2125	-0.05172	-0.1653	0.005838	0.119	0.1578	0.07336	MZB1	cluster 2
LTO1	uniprot.Q8WV07_ukb.OID20434_decode.18195_3	Q8WV07	NA	NA	NA	NA	NA	NA	NA	NA	NA	NA	NA	NA	NA	LTO1	#N/A
BLNK	uniprot.Q8WV28_ukb.OID30541_decode.19225_11	Q8WV28	-0.1768	0.1813	-0.1813	-0.1817	-0.03998	-0.1498	-0.1435	-0.009716	-0.1438	-0.00663	0.09546	0.1526	0.09208	BLNK	cluster 2
POF1B	uniprot.Q8WVV4_ukb.OID30504_decode.NA	Q8WVV4	-0.2083	0.2199	-0.2199	-0.3585	-0.2369	-0.35	-0.3432	-0.08516	-0.1185	0.03452	0.124	0.1885	0.2689	POF1B	cluster 2
PALLD	uniprot.Q8WX93_ukb.OID30444_decode.NA	Q8WX93	NA	NA	NA	NA	NA	NA	NA	NA	NA	NA	NA	NA	NA	PALLD	#N/A
SCG3	uniprot.Q8WXD2_ukb.OID20728_decode.7957_2	Q8WXD2	0.09987	-0.09792	0.09792	-0.02208	-0.1329	-0.06908	-0.07702	-0.009812	0.1018	0.01784	-0.0558	-0.1571	0.05106	SCG3	cluster 4
CLEC4D	uniprot.Q8WXI8_ukb.OID20609_decode.7752_31	Q8WXI8	-0.3498	0.3577	-0.3577	-0.4098	-0.1448	-0.3487	-0.3329	-0.1093	-0.2098	0.007854	0.1565	0.1745	0.08474	CLEC4D	cluster 6
ST8SIA1	uniprot.Q92185_ukb.OID30442_decode.NA	Q92185	0.01468	-0.004874	0.004874	-0.03452	-0.05922	-0.04366	-0.04843	0.009731	-0.1241	-0.06421	0.03001	0.04972	-0.03912	ST8SIA1	cluster 4
SMPDL3A	uniprot.Q92484_ukb.OID20676_decode.4771_10	Q92484	-0.00387	0.0005656	-0.0005656	0.08917	0.1201	0.1131	0.1138	0.1408	0.03852	-0.0313	-0.05845	-0.08887	-0.129	SMPDL3A	cluster 5
CFHR4	uniprot.Q92496_ukb.OID30758_decode.6471_53	Q92496	-0.02218	0.02265	-0.02265	-0.02507	-0.01183	-0.02488	-0.02323	0.01114	-0.008978	-0.033	-0.02333	0.005651	-0.006563	CFHR4	cluster 4
TSC1	uniprot.Q92574_ukb.OID30478_decode.NA	Q92574	0.004858	-0.0008674	0.0008674	-0.04323	-0.05772	-0.04483	-0.04855	0.05811	-0.07879	0.0628	0.1138	0.04318	0.04032	TSC1	cluster 3
CCL17	uniprot.Q92583_ukb.OID20745_decode.3519_3	Q92583	-0.08836	0.09119	-0.09119	-0.08803	-0.01726	-0.07067	-0.06596	0.06461	-0.05884	0.05675	0.09186	0.08605	0.01871	CCL17	cluster 3
TBC1D5	uniprot.Q92609_ukb.OID20521_decode.9960_2	Q92609	-0.03384	0.03179	-0.03179	-0.005669	0.043	0.01366	0.01706	0.1184	0.04813	0.04664	0.002088	0.0158	0.02552	TBC1D5	cluster 3
ARHGAP45	uniprot.Q92619_ukb.OID30653_decode.13544_9	Q92619	-0.09311	0.09283	-0.09283	-0.01924	0.0827	0.02101	0.02566	0.0728	-0.06774	0.04837	0.08424	0.094	-0.00503	ARHGAP45	cluster 3
NRGN	uniprot.Q92686_ukb.OID30674_decode.18303_39	Q92686	-0.01273	0.00886	-0.00886	0.1014	0.1384	0.1289	0.1297	-0.02732	-0.02528	0.05475	0.06914	0.01295	-0.05551	NRGN	cluster 3
TANK	uniprot.Q92844_ukb.OID20474_decode.14013_11	Q92844	-0.03143	0.03635	-0.03635	-0.0634	-0.03578	-0.05343	-0.0568	0.08637	-0.08138	0.09391	0.1309	0.08001	-0.009025	TANK	cluster 3
TNFRSF14	uniprot.Q92956_ukb.OID20783_decode.5352_11	Q92956	-0.4253	0.4453	-0.4453	-0.5691	-0.2783	-0.5106	-0.4948	-0.1606	-0.3524	0.01151	0.2482	0.2303	0.1992	TNFRSF14	cluster 6
RBPMS	uniprot.Q93062_ukb.OID30507_decode.NA	Q93062	-0.1929	0.1935	-0.1935	-0.09375	0.09044	-0.02941	-0.02047	0.1789	-0.05332	0.1312	0.1685	0.1427	-0.06911	RBPMS	cluster 2
RNASE6	uniprot.Q93091_ukb.OID30689_decode.5646_20	Q93091	-0.7481	0.7785	-0.7785	-1.055	-0.5796	-0.9662	-0.9443	-0.255	-0.4028	-0.09118	0.1926	0.4603	0.4386	RNASE6	cluster 1
NCLN	uniprot.Q969V3_ukb.OID20448_decode.NA	Q969V3	0.03821	-0.03719	0.03719	0.00296	-0.03092	-0.01538	-0.01783	0.1375	0.03596	-0.1133	-0.1291	0.01885	-0.1127	NCLN	cluster 4
SYAP1	uniprot.Q96A49_ukb.OID30636_decode.NA	Q96A49	-0.1181	0.1171	-0.1171	-0.02717	0.09002	0.01585	0.02075	0.1013	-0.05928	0.1158	0.1452	0.1742	0.01558	SYAP1	cluster 3
VTI1A	uniprot.Q96AJ9_ukb.OID30640_decode.7952_2	Q96AJ9	-0.1309	0.1347	-0.1347	-0.1259	-0.01225	-0.0917	-0.0894	0.0951	-0.1306	0.1169	0.1899	0.1095	0.05055	VTI1A	cluster 2
RAB37	uniprot.Q96AX2_ukb.OID20425_decode.NA	Q96AX2	-0.06711	0.07502	-0.07502	-0.02573	0.03419	0.005856	0.006213	-0.04742	-0.1264	0.03185	0.1145	-0.006957	-0.04594	RAB37	cluster 3
REPS1	uniprot.Q96D71_ukb.OID30496_decode.NA	Q96D71	-0.3087	0.3074	-0.3074	-0.3177	-0.04357	-0.2329	-0.2282	-0.1694	-0.2974	0.1523	0.3215	0.2014	0.255	REPS1	cluster 6
FXYD5	uniprot.Q96DB9_ukb.OID20463_decode.NA	Q96DB9	-0.1338	0.137	-0.137	-0.04044	0.1038	0.01661	0.02356	0.06431	-0.086	0.1001	0.1445	0.1333	0.01093	FXYD5	cluster 3
SIRT1	uniprot.Q96EB6_ukb.OID30439_decode.NA	Q96EB6	-0.04035	0.04702	-0.04702	-0.03622	-0.002218	-0.02337	-0.02371	0.108	-0.06792	0.2002	0.2331	0.03968	-0.003382	SIRT1	cluster 3
RNF31	uniprot.Q96EP0_ukb.OID30473_decode.NA	Q96EP0	-0.02028	0.04055	-0.04055	-0.1715	-0.172	-0.1872	-0.1968	0.09628	-0.1773	-0.121	0.02368	0.2108	-0.0616	RNF31	cluster 4
CRELD1	uniprot.Q96HD1_ukb.OID30619_decode.7628_40	Q96HD1	-0.259	0.2703	-0.2703	-0.3228	-0.1309	-0.2793	-0.2702	-0.1014	-0.1974	-0.01147	0.1236	0.2787	0.1516	CRELD1	cluster 2
CPB2	uniprot.Q96IY4_ukb.OID30734_decode.3518_54	Q96IY4	-0.1064	0.1019	-0.1019	-0.06258	0.03882	-0.03095	-0.02552	0.09314	-0.05746	0.163	0.1748	0.1492	0.04123	CPB2	cluster 3
MEGF10	uniprot.Q96KG7_ukb.OID20746_decode.11168_3	Q96KG7	0.1121	-0.1152	0.1152	0.04694	-0.0608	0.007811	0.003323	0.04055	0.04579	-0.063	-0.08176	-0.02555	-0.02564	MEGF10	cluster 4
FCRL2	uniprot.Q96LA5_ukb.OID20639_decode.NA	Q96LA5	-0.1751	0.1846	-0.1846	-0.256	-0.1433	-0.2338	-0.2302	0.02488	-0.02383	-0.01457	0.0006587	0.09333	0.0608	FCRL2	cluster 2
SIGLEC10	uniprot.Q96LC7_ukb.OID20537_decode.NA	Q96LC7	-0.3867	0.4053	-0.4053	-0.4882	-0.2174	-0.4284	-0.4146	-0.08059	-0.2108	-0.07859	0.06916	0.2535	0.1064	SIGLEC10	cluster 6
HS6ST2	uniprot.Q96MM7_ukb.OID30481_decode.13524_25	Q96MM7	0.1359	-0.1196	0.1196	-0.1931	-0.4047	-0.2929	-0.3089	-0.1364	-0.1074	-0.2329	-0.1245	-0.1391	0.07578	HS6ST2	cluster 2
FCRL3	uniprot.Q96P31_ukb.OID20443_decode.4440_15	Q96P31	-0.2127	0.2182	-0.2182	-0.2486	-0.1072	-0.2051	-0.1996	-0.0024	-0.2312	-0.09847	0.06686	0.1432	-0.009359	FCRL3	cluster 2
IL17F	uniprot.Q96PD4_ukb.OID20456_decode.14026_24	Q96PD4	-0.2613	0.266	-0.266	-0.1834	0.05039	-0.1173	-0.1002	0.07821	0.001863	-0.03003	-0.02933	0.03421	0.06014	IL17F	cluster 2
PGLYRP2	uniprot.Q96PD5_ukb.OID30742_decode.5601_2	Q96PD5	0.02305	-0.02582	0.02582	0.04521	0.03618	0.049	0.04993	0.01733	-0.05709	-0.008653	0.03427	-0.07747	-0.1417	PGLYRP2	cluster 4
SCGB3A2	uniprot.Q96PL1_ukb.OID20723_decode.NA	Q96PL1	0.09605	-0.09692	0.09692	0.03961	-0.06456	0.006842	0.003217	0.06308	0.07095	-0.007363	-0.05586	-0.1154	0.006579	SCGB3A2	cluster 4
ERMAP	uniprot.Q96PL5_ukb.OID30539_decode.8631_13	Q96PL5	-0.2872	0.2933	-0.2933	-0.2909	-0.06095	-0.2298	-0.2173	0.01916	-0.1737	0.06846	0.1812	0.1703	0.09139	ERMAP	cluster 2
NEDD4L	uniprot.Q96PU5_ukb.OID30521_decode.NA	Q96PU5	-0.1446	0.139	-0.139	-0.03563	0.1122	0.02482	0.02994	-0.0215	-0.001737	0.02513	0.02415	0.07165	-0.03033	NEDD4L	cluster 3
SLITRK1	uniprot.Q96PX8_ukb.OID30510_decode.15539_15	Q96PX8	0.2026	-0.1949	0.1949	0.01801	-0.1977	-0.06779	-0.08096	-0.0186	0.1037	-0.09175	-0.1473	-0.2045	0.0345	SLITRK1	cluster 5
SCGB3A1	uniprot.Q96QR1_ukb.OID30577_decode.6252_62	Q96QR1	0.05433	-0.05496	0.05496	0.0424	-0.006059	0.02646	0.02479	0.02215	0.02026	0.003732	-0.005014	-0.1008	-0.07637	SCGB3A1	cluster 4
TNFRSF13C	uniprot.Q96RJ3_ukb.OID20480_decode.5383_14	Q96RJ3	-0.1626	0.1672	-0.1672	-0.1546	-0.01865	-0.1096	-0.1047	0.02488	-0.1477	0.01449	0.1123	0.1429	0.02781	TNFRSF13C	cluster 2
PPP1R9B	uniprot.Q96SB3_ukb.OID20643_decode.NA	Q96SB3	-0.1046	0.1041	-0.1041	-0.03276	0.07755	0.00634	0.01082	0.05158	-0.06649	0.1638	0.1907	0.01048	0.00581	PPP1R9B	cluster 3
CSF3R	uniprot.Q99062_ukb.OID30527_decode.2719_3	Q99062	-0.2927	0.3026	-0.3026	-0.3084	-0.08748	-0.2511	-0.241	-0.04651	-0.1794	-0.08778	0.04667	0.1441	0.02631	CSF3R	cluster 2
NELL2	uniprot.Q99435_ukb.OID20706_decode.6022_57	Q99435	0.1475	-0.1445	0.1445	0.04835	-0.09981	-0.00587	-0.01357	0.04919	0.002358	-0.03638	-0.03463	-0.1707	-0.04644	NELL2	cluster 4
LGMN	uniprot.Q99538_ukb.OID20773_decode.3622_33	Q99538	-0.1394	0.1408	-0.1408	-0.09258	0.03537	-0.04949	-0.04278	0.1161	-0.104	0.0529	0.1144	0.1051	-0.01201	LGMN	cluster 3
SERPINI1	uniprot.Q99574_ukb.OID30604_decode.NA	Q99574	-0.02483	0.02605	-0.02605	-0.02273	-0.003588	-0.01957	-0.0171	0.05937	-0.06104	-0.09604	-0.04675	0.01832	-0.04822	SERPINI1	cluster 4
S100A13	uniprot.Q99584_ukb.OID30529_decode.7223_60	Q99584	0.05883	-0.05452	0.05452	-0.2777	-0.4162	-0.3725	-0.373	-0.2016	-0.2996	-0.3019	-0.05158	-0.1166	0.1173	S100A13	cluster 2
CCL13	uniprot.Q99616_ukb.OID20655_decode.4144_13	Q99616	-0.04909	0.05165	-0.05165	-0.02082	0.01752	-0.00907	-0.004953	0.01881	-0.07742	-0.007119	0.05515	0.003686	-0.04604	CCL13	cluster 3
IL12RB2	uniprot.Q99665_ukb.OID30422_decode.3815_14	Q99665	0.03234	-0.03739	0.03739	0.06318	0.05953	0.07364	0.07054	0.04982	0.1365	-0.09477	-0.1763	0.001285	-0.05864	IL12RB2	cluster 5
MGLL	uniprot.Q99685_ukb.OID20711_decode.NA	Q99685	-0.06185	0.06466	-0.06466	0.03403	0.1111	0.07019	0.07388	0.08517	-0.07164	0.1419	0.1714	0.06822	-0.02217	MGLL	cluster 3
CCL19	uniprot.Q99731_ukb.NA_decode.4922_13	Q99731	-0.1612	0.1578	-0.1578	-0.08027	0.06215	-0.03216	-0.0187	0.06116	-0.04245	0.006092	0.02408	0.04156	-0.06099	CCL19	cluster 3
NRTN	uniprot.Q99748_ukb.OID20465_decode.NA	Q99748	NA	NA	NA	NA	NA	NA	NA	NA	NA	NA	NA	NA	NA	NRTN	#N/A
CTRC	uniprot.Q99895_ukb.OID20752_decode.5626_20	Q99895	0.1246	-0.1219	0.1219	0.0402	-0.07877	-0.00617	-0.0123	0.08656	0.01486	-0.06839	-0.06939	-0.08473	-0.06733	CTRC	cluster 4
OMD	uniprot.Q99983_ukb.OID20725_decode.5358_3	Q99983	0.1536	-0.1513	0.1513	0.07048	-0.07146	0.02195	0.01203	0.007056	0.04997	-0.07706	-0.1035	-0.221	-0.04837	OMD	cluster 4
MXRA8	uniprot.Q9BRK3_ukb.OID30583_decode.10521_10	Q9BRK3	0.2311	-0.2273	0.2273	0.06546	-0.1796	-0.02678	-0.04082	0.006995	0.1678	-0.06536	-0.167	-0.2836	0.0628	MXRA8	cluster 5
PSMG3	uniprot.Q9BT73_ukb.OID20549_decode.12729_12	Q9BT73	-0.1653	0.1685	-0.1685	-0.1528	-0.008784	-0.1103	-0.1042	0.01466	-0.04816	-0.04415	-0.009934	0.06809	0.0266	PSMG3	cluster 2
CHRDL1	uniprot.Q9BU40_ukb.OID20771_decode.3362_61	Q9BU40	-0.2087	0.228	-0.228	-0.4516	-0.3636	-0.4606	-0.4576	-0.01221	-0.1305	-0.1202	-0.01815	0.01852	0.1113	CHRDL1	cluster 6
PAXX	uniprot.Q9BUH6_ukb.OID30591_decode.NA	Q9BUH6	-0.2703	0.2779	-0.2779	-0.2952	-0.08628	-0.2444	-0.2353	0.01278	-0.205	0.02859	0.1643	0.2154	0.05061	PAXX	cluster 2
MENT	uniprot.Q9BUN1_ukb.OID30595_decode.5744_12	Q9BUN1	0.3648	-0.371	0.371	0.2971	-0.02006	0.1993	0.1834	0.04416	0.07908	0.04831	-0.009951	-0.2517	-0.05674	MENT	cluster 5
VAMP8	uniprot.Q9BV40_ukb.OID30555_decode.7064_2	Q9BV40	-0.1888	0.1878	-0.1878	-0.1172	0.05587	-0.05673	-0.04873	-0.003132	-0.1908	0.1287	0.2435	0.1898	0.04679	VAMP8	cluster 3
JAM3	uniprot.Q9BX67_ukb.OID30586_decode.2998_53	Q9BX67	-0.1324	0.1393	-0.1393	-0.1538	-0.04493	-0.1253	-0.121	0.06151	-0.09731	0.03493	0.09588	0.08708	0.0732	JAM3	cluster 2
C1QTNF5	uniprot.Q9BXJ0_ukb.OID30618_decode.7810_20	Q9BXJ0	0.01852	-0.01501	0.01501	-0.0007921	-0.01733	-0.007482	-0.006928	-0.02044	-0.08361	-0.1209	-0.0497	-0.06192	-0.03207	C1QTNF5	cluster 4
AMN	uniprot.Q9BXJ7_ukb.OID20492_decode.4322_28	Q9BXJ7	-0.1505	0.1598	-0.1598	-0.1254	0.0236	-0.06831	-0.06131	-0.06957	-0.3643	-0.06026	0.1611	0.3196	-0.01018	AMN	cluster 2
CLEC7A	uniprot.Q9BXN2_ukb.OID20636_decode.3603_60	Q9BXN2	-0.4015	0.4236	-0.4236	-0.5491	-0.275	-0.4928	-0.48	-0.1215	-0.2196	-0.05903	0.08918	0.1096	0.1588	CLEC7A	cluster 6
CFHR5	uniprot.Q9BXR6_ukb.OID30716_decode.16055_3	Q9BXR6	-0.08762	0.08201	-0.08201	-0.02115	0.07434	0.01156	0.01848	-0.004477	-0.0587	0.01311	0.05053	-0.006412	-0.03493	CFHR5	cluster 3
HDAC8	uniprot.Q9BY41_ukb.OID30436_decode.2859_69	Q9BY41	-0.05662	0.05786	-0.05786	-0.03155	0.02637	-0.009534	-0.00484	0.1173	0.08414	0.1113	0.04516	-0.000334	-0.003702	HDAC8	cluster 3
ANGPTL4	uniprot.Q9BY76_ukb.OID20703_decode.3796_79	Q9BY76	-0.357	0.3841	-0.3841	-0.5596	-0.3457	-0.5254	-0.515	-0.1433	-0.4323	0.01247	0.3129	0.3204	0.2592	ANGPTL4	cluster 6
REG4	uniprot.Q9BYZ8_ukb.OID20784_decode.11102_22	Q9BYZ8	-0.07312	0.08231	-0.08231	-0.2337	-0.2376	-0.2558	-0.2593	0.02024	-0.005769	0.07638	0.07293	0.1236	0.1149	REG4	cluster 2
CD244	uniprot.Q9BZW8_ukb.OID20628_decode.5063_12	Q9BZW8	-0.1143	0.1209	-0.1209	-0.1499	-0.07806	-0.1367	-0.1336	-0.0005826	-0.0247	-0.006126	0.01023	0.0156	0.01094	CD244	cluster 2
SIGLEC1	uniprot.Q9BZZ2_ukb.OID20690_decode.4464_10	Q9BZZ2	-0.3403	0.3489	-0.3489	-0.3516	-0.07876	-0.2748	-0.2609	0.03794	-0.2184	-0.04043	0.1078	0.172	0.02497	SIGLEC1	cluster 2
TRIM5	uniprot.Q9C035_ukb.OID20526_decode.NA	Q9C035	-0.04953	0.05192	-0.05192	-0.004766	0.05033	0.02057	0.02124	0.03194	-0.07998	0.08369	0.1234	0.06452	-0.00791	TRIM5	cluster 3
PRSS22	uniprot.Q9GZN4_ukb.OID30483_decode.4534_10	Q9GZN4	-0.05794	0.06505	-0.06505	-0.1556	-0.1453	-0.168	-0.1692	-0.07286	-0.1608	-0.1317	-0.002415	-0.00615	-0.04098	PRSS22	cluster 4
PDGFD	uniprot.Q9GZP0_ukb.NA_decode.17140_57	Q9GZP0	-0.01651	0.01799	-0.01799	-0.04039	-0.02404	-0.03903	-0.04024	0.004338	-0.04069	-0.05387	-0.02485	-0.01994	-0.003882	PDGFD	cluster 4
EGLN1	uniprot.Q9GZT9_ukb.OID20572_decode.9901_28	Q9GZT9	-0.2694	0.2772	-0.2772	-0.2789	-0.05328	-0.219	-0.2054	0.06496	-0.2013	0.0486	0.1738	0.268	0.08524	EGLN1	cluster 2
FGF23	uniprot.Q9GZV9_ukb.OID21411_decode.3807_1	Q9GZV9	-0.1712	0.1849	-0.1849	-0.238	-0.1142	-0.2118	-0.2027	-0.1071	-0.2376	-0.1136	0.06203	0.3114	0.05615	FGF23	cluster 2
LHPP	uniprot.Q9H008_ukb.OID20749_decode.NA	Q9H008	-0.3746	0.383	-0.383	-0.348	-0.02567	-0.2521	-0.2388	0.08079	-0.3049	-0.08097	0.1232	0.2592	0.0511	LHPP	cluster 2
NT5C3A	uniprot.Q9H0P0_ukb.OID20553_decode.19615_213	Q9H0P0	-0.03987	0.04457	-0.04457	-0.04454	-0.009357	-0.02784	-0.03008	0.04741	0.03223	0.0794	0.04272	0.0553	0.07971	NT5C3A	cluster 3
TSPYL1	uniprot.Q9H0U9_ukb.OID30512_decode.NA	Q9H0U9	-0.1835	0.1872	-0.1872	-0.1501	0.01066	-0.09923	-0.09442	-0.02615	-0.1768	0.09978	0.2083	0.1333	0.04348	TSPYL1	cluster 2
ZBP1	uniprot.Q9H171_ukb.OID30526_decode.NA	Q9H171	-0.3967	0.4043	-0.4043	-0.362	-0.00902	-0.2715	-0.255	0.1386	-0.1895	0.06334	0.1672	0.2637	0.05302	ZBP1	cluster 2
SEMA6C_1	uniprot.Q9H3T2_ukb.OID30531_decode.7202_107	Q9H3T2	0.08569	-0.06968	0.06968	-0.1352	-0.2798	-0.1975	-0.2116	0.007063	-0.1814	-0.01198	0.09508	0.1233	0.1478	SEMA6C	cluster 2
SMOC2	uniprot.Q9H3U7_ukb.OID20730_decode.15635_4	Q9H3U7	-0.0246	0.04861	-0.04861	-0.3371	-0.4185	-0.3991	-0.4062	-0.07068	-0.1878	-0.1814	-0.0328	0.1854	0.201	SMOC2	cluster 2
CLSTN2	uniprot.Q9H4D0_ukb.OID20664_decode.18882_7	Q9H4D0	0.08501	-0.0847	0.0847	0.09121	0.02226	0.07432	0.07161	0.09388	0.0437	0.009902	-0.0278	-0.07537	-0.04433	CLSTN2	cluster 4
CDCP1	uniprot.Q9H5V8_ukb.OID20940_decode.16818_200	Q9H5V8	-0.1833	0.1926	-0.1926	-0.2155	-0.08659	-0.1848	-0.1775	-0.003027	-0.1462	0.04796	0.1411	0.1486	0.07137	CDCP1	cluster 2
DIPK2B	uniprot.Q9H7Y0_ukb.OID30582_decode.NA	Q9H7Y0	-0.006011	0.01336	-0.01336	-0.1408	-0.1738	-0.1686	-0.1724	-0.07915	-0.04987	-0.139	-0.08742	-0.03727	0.06818	DIPK2B	cluster 4
PTGES2	uniprot.Q9H7Z7_ukb.OID30561_decode.18458_4	Q9H7Z7	-0.1557	0.1615	-0.1615	-0.1291	0.006232	-0.08587	-0.07888	-0.003377	-0.0899	0.04677	0.1041	0.1734	0.05326	PTGES2	cluster 2
UBE2Z	uniprot.Q9H832_ukb.OID30427_decode.NA	Q9H832	-0.07209	0.07614	-0.07614	-0.04049	0.03664	-0.01176	-0.01182	0.08775	-0.04358	0.0492	0.07421	0.08422	-0.03157	UBE2Z	cluster 3
PSTPIP2	uniprot.Q9H939_ukb.OID30596_decode.NA	Q9H939	-0.1073	0.1079	-0.1079	-0.0336	0.07511	0.009141	0.01348	0.04632	-0.07078	0.09068	0.1284	0.07096	-0.01306	PSTPIP2	cluster 3
IL1RL2	uniprot.Q9HB29_ukb.OID20487_decode.2994_71	Q9HB29	-0.05274	0.05339	-0.05339	-0.02227	0.03085	0.0008161	0.002818	-0.04062	-0.02169	-0.03284	-0.01555	-0.02643	0.004914	IL1RL2	cluster 3
CACYBP	uniprot.Q9HB71_ukb.OID30649_decode.12432_23	Q9HB71	-0.05414	0.05316	-0.05316	0.01053	0.08415	0.04267	0.04542	0.08951	-0.03036	0.05364	0.06559	0.05275	-0.02648	CACYBP	cluster 3
IL21R	uniprot.Q9HBE5_ukb.OID30441_decode.9366_54	Q9HBE5	-0.184	0.1986	-0.1986	-0.2137	-0.0735	-0.1725	-0.1693	-0.1535	-0.3383	-0.1208	0.1159	0.1908	0.05643	IL21R	cluster 2
LY9	uniprot.Q9HBG7_ukb.OID20670_decode.3324_51	Q9HBG7	-0.1297	0.1376	-0.1376	-0.1754	-0.09459	-0.1595	-0.1557	0.01347	-0.06934	-0.03195	0.02009	0.04784	-0.00929	LY9	cluster 2
GLOD4	uniprot.Q9HC38_ukb.OID20710_decode.NA	Q9HC38	-0.1785	0.183	-0.183	-0.1078	0.05469	-0.05405	-0.04511	0.07004	-0.1288	0.07528	0.1493	0.08755	-0.0009423	GLOD4	cluster 3
SPON1	uniprot.Q9HCB6_ukb.OID20759_decode.4297_62	Q9HCB6	0.01343	-0.001969	0.001969	-0.1102	-0.1545	-0.1369	-0.1399	0.007456	-0.1346	-0.02513	0.0695	0.02991	0.09939	SPON1	cluster 4
PLXNA4	uniprot.Q9HCM2_ukb.OID20597_decode.19560_23	Q9HCM2	0.008093	-0.008929	0.008929	0.07	0.08337	0.0826	0.08254	0.0726	-0.03569	0.133	0.1402	0.03711	-0.03516	PLXNA4	cluster 3
CELSR2	uniprot.Q9HCU4_ukb.OID30593_decode.NA	Q9HCU4	-0.1712	0.1902	-0.1902	-0.5232	-0.5036	-0.5658	-0.5702	-0.1272	-0.2291	-0.1159	0.05504	0.2688	0.321	CELSR2	cluster 6
PREB	uniprot.Q9HCU5_ukb.OID20439_decode.NA	Q9HCU5	-0.3142	0.347	-0.347	-0.5302	-0.3358	-0.5121	-0.502	-0.1718	-0.3197	0.03119	0.2759	0.1777	0.2601	PREB	cluster 6
GOPC	uniprot.Q9HD26_ukb.OID20551_decode.NA	Q9HD26	-0.1012	0.104	-0.104	-0.008167	0.1004	0.0353	0.04032	0.05041	-0.1082	0.08217	0.1425	0.1071	-0.02235	GOPC	cluster 3
AMBN	uniprot.Q9NP70_ukb.OID20437_decode.NA	Q9NP70	0.101	-0.0891	0.0891	-0.04721	-0.1886	-0.09817	-0.1065	-0.0002297	0.1448	-0.06773	-0.169	-0.1137	0.05088	AMBN	cluster 4
NPHS2	uniprot.Q9NP85_ukb.OID30462_decode.NA	Q9NP85	-0.02661	0.03114	-0.03114	0.0344	0.08656	0.05742	0.06172	-0.01967	-0.1167	-0.08261	0.02402	-0.02692	-0.03263	NPHS2	cluster 3
FGF20	uniprot.Q9NP95_ukb.OID30459_decode.2763_66	Q9NP95	0.1103	-0.1104	0.1104	0.2906	0.2657	0.3166	0.3137	0.1095	0.2726	-0.2352	-0.3895	-0.2976	-0.2394	FGF20	cluster 5
SLAMF7	uniprot.Q9NQ25_ukb.OID20602_decode.5487_7	Q9NQ25	-0.1412	0.148	-0.148	-0.1371	-0.02576	-0.106	-0.1006	0.01854	-0.08745	-0.03419	0.02895	0.05847	0.03683	SLAMF7	cluster 2
ESM1	uniprot.Q9NQ30_ukb.OID20758_decode.3805_16	Q9NQ30	0.07117	-0.07126	0.07126	0.03993	-0.02683	0.01684	0.01279	-0.03888	0.008483	-0.1093	-0.09872	-0.2332	-0.05277	ESM1	cluster 4
LZTFL1	uniprot.Q9NQ48_ukb.OID30637_decode.NA	Q9NQ48	-0.1159	0.1167	-0.1167	-0.03192	0.08232	0.01193	0.0175	0.04237	-0.1148	0.06743	0.1372	0.1288	-0.01015	LZTFL1	cluster 3
PLCB1	uniprot.Q9NQ66_ukb.OID30484_decode.11354_21	Q9NQ66	0.2064	-0.2125	0.2125	0.09359	-0.05874	0.04082	0.03137	0.06488	0.03349	0.08326	0.04943	-0.0537	-0.002854	PLCB1	cluster 5
MEPE	uniprot.Q9NQ76_ukb.OID20753_decode.3209_69	Q9NQ76	-0.01351	0.02756	-0.02756	-0.2548	-0.3237	-0.3081	-0.3133	-0.1782	-0.1091	-0.1834	-0.08281	-0.01785	0.09758	MEPE	cluster 2
DDX4	uniprot.Q9NQI0_ukb.OID30431_decode.NA	Q9NQI0	0.09284	-0.09215	0.09215	0.03208	-0.06815	-0.004837	-0.01385	-0.08697	-0.2541	-0.2637	-0.04271	0.02758	-0.01216	DDX4	cluster 4
PDLIM7	uniprot.Q9NR12_ukb.OID20729_decode.NA	Q9NR12	-0.09945	0.102	-0.102	-0.02898	0.07219	0.009888	0.01392	0.0627	-0.116	0.1295	0.1915	0.06323	0.004474	PDLIM7	cluster 3
PDGFC	uniprot.Q9NRA1_ukb.OID21183_decode.13658_31	Q9NRA1	-0.1632	0.1588	-0.1588	-0.1082	0.0482	-0.05878	-0.04634	-0.1309	-0.1437	0.04732	0.1551	0.08096	-0.01219	PDGFC	cluster 3
CCL28	uniprot.Q9NRJ3_ukb.OID20569_decode.2890_59	Q9NRJ3	0.0786	-0.08019	0.08019	0.08211	0.0224	0.06579	0.06203	0.09183	0.04348	0.03137	-0.002705	-0.1216	-0.07107	CCL28	cluster 4
IL17RB	uniprot.Q9NRM6_ukb.OID20585_decode.6262_14	Q9NRM6	0.01178	-0.008132	0.008132	-0.09049	-0.1332	-0.1173	-0.1199	0.02648	0.0831	0.005079	-0.05894	-0.1724	0.07044	IL17RB	cluster 4
TPSG1	uniprot.Q9NRR2_ukb.OID30424_decode.3404_51	Q9NRR2	0.1074	-0.1057	0.1057	0.07554	-0.04154	0.03207	0.02721	-0.1398	-0.141	-0.1304	-0.006307	-0.05737	-0.04681	TPSG1	cluster 4
SNX15	uniprot.Q9NRS6_ukb.OID30644_decode.NA	Q9NRS6	-0.1144	0.1153	-0.1153	-0.1018	-0.005908	-0.07226	-0.06879	0.03667	-0.1118	0.01175	0.08566	0.1298	-0.0177	SNX15	cluster 3
THSD1	uniprot.Q9NS62_ukb.OID30476_decode.5621_64	Q9NS62	0.2184	-0.2138	0.2138	0.1115	-0.09902	0.03448	0.02138	-0.007428	0.09733	-0.09741	-0.1457	-0.1643	-0.08579	THSD1	cluster 5
SEMA3G	uniprot.Q9NS98_ukb.OID30599_decode.5628_21	Q9NS98	0.07399	-0.07205	0.07205	0.004241	-0.07327	-0.02794	-0.03282	-0.008362	0.0002428	-0.03794	-0.02879	-0.04098	0.01655	SEMA3G	cluster 4
BABAM1	uniprot.Q9NWV8_ukb.OID30466_decode.NA	Q9NWV8	NA	NA	NA	NA	NA	NA	NA	NA	NA	NA	NA	NA	NA	BABAM1	#N/A
IRAK4	uniprot.Q9NWZ3_ukb.OID20577_decode.18162_167	Q9NWZ3	-0.0821	0.08457	-0.08457	-0.01625	0.07741	0.02415	0.02715	0.1087	-0.04873	0.08868	0.1035	0.1071	0.002867	IRAK4	cluster 3
SMPD3	uniprot.Q9NY59_ukb.OID30477_decode.NA	Q9NY59	-0.1096	0.1166	-0.1166	-0.1869	-0.1273	-0.1798	-0.1779	0.05636	-0.04274	0.001821	0.02673	0.02518	0.04291	SMPD3	cluster 2
IL20	uniprot.Q9NYY1_ukb.OID20453_decode.4138_25	Q9NYY1	NA	NA	NA	NA	NA	NA	NA	NA	NA	NA	NA	NA	NA	IL20	#N/A
TREM2	uniprot.Q9NZC2_ukb.OID20731_decode.16300_4	Q9NZC2	-0.1444	0.154	-0.154	-0.2259	-0.1436	-0.216	-0.2102	-0.04592	-0.1345	0.0174	0.1092	0.0747	0.08578	TREM2	cluster 2
IL36G	uniprot.Q9NZH8_ukb.OID30551_decode.9117_4	Q9NZH8	-0.1681	0.1892	-0.1892	-0.3259	-0.2454	-0.3251	-0.3258	-0.208	-0.1951	-0.02997	0.1128	0.2358	0.06171	IL36G	cluster 2
ADA2	uniprot.Q9NZK5_ukb.NA_decode.6077_63	Q9NZK5	-0.3833	0.3976	-0.3976	-0.3672	-0.06384	-0.2846	-0.2669	0.1605	0.05912	-0.1146	-0.1395	0.01534	-0.1121	ADA2	cluster 5
ARHGEF12	uniprot.Q9NZN5_ukb.OID20554_decode.NA	Q9NZN5	-0.1083	0.1091	-0.1091	-0.02852	0.0796	0.01022	0.01531	0.03326	-0.1283	0.1403	0.2046	0.05623	0.0007412	ARHGEF12	cluster 3
C1RL	uniprot.Q9NZP8_ukb.OID30721_decode.9348_1	Q9NZP8	-0.2571	0.2654	-0.2654	-0.2426	-0.03286	-0.1837	-0.1713	-0.09998	-0.2608	-0.01196	0.1676	0.2013	0.03002	C1RL	cluster 2
KLRF1	uniprot.Q9NZS2_ukb.OID30464_decode.5098_79	Q9NZS2	-0.217	0.2302	-0.2302	-0.2713	-0.119	-0.2377	-0.2276	-0.09496	-0.1661	-0.01653	0.08904	0.1245	0.06259	KLRF1	cluster 2
CRIM1_1	uniprot.Q9NZV1_ukb.OID20701_decode.8699_43	Q9NZV1	-0.1635	0.175	-0.175	-0.2418	-0.1348	-0.218	-0.2126	-0.03401	-0.1278	-0.07341	0.01265	0.06033	0.1403	CRIM1	cluster 2
IL17C	uniprot.Q9P0M4_ukb.OID20477_decode.9255_5	Q9P0M4	-0.2332	0.2382	-0.2382	-0.3326	-0.1814	-0.3083	-0.2975	-0.1469	-0.2122	0.04204	0.1852	0.1641	0.06427	IL17C	cluster 2
GMPR2	uniprot.Q9P2T1_ukb.OID30623_decode.19446_1	Q9P2T1	-0.07162	0.07203	-0.07203	0.006856	0.09142	0.04313	0.04529	0.09558	-0.03238	0.04856	0.06418	0.07779	0.01715	GMPR2	cluster 3
TNFRSF10D	uniprot.Q9UBN6_ukb.NA_decode.14121_24	Q9UBN6	-0.1869	0.1875	-0.1875	-0.1071	0.05422	-0.04824	-0.03951	-0.1265	-0.07139	0.1494	0.1801	0.1735	0.1941	TNFRSF10D	cluster 2
CLIP2	uniprot.Q9UDT6_ukb.OID20559_decode.NA	Q9UDT6	-0.1153	0.1147	-0.1147	-0.01249	0.1093	0.03609	0.04066	0.04148	-0.119	0.1576	0.2168	0.05977	0.01704	CLIP2	cluster 3
CD300A	uniprot.Q9UGN4_ukb.OID30576_decode.5630_48	Q9UGN4	-0.291	0.3092	-0.3092	-0.4345	-0.256	-0.4057	-0.398	-0.07007	-0.1819	-0.04552	0.09321	0.1482	0.12	CD300A	cluster 6
IL36A	uniprot.Q9UHA7_ukb.OID30472_decode.14150_7	Q9UHA7	NA	NA	NA	NA	NA	NA	NA	NA	NA	NA	NA	NA	NA	IL36A	#N/A
CNTNAP2	uniprot.Q9UHC6_ukb.OID20556_decode.6965_19	Q9UHC6	0.03988	-0.0347	0.0347	-0.01873	-0.07199	-0.04198	-0.04442	0.003052	0.03773	-0.009252	-0.02679	-0.103	0.001256	CNTNAP2	cluster 4
IL20RA	uniprot.Q9UHF4_ukb.OID20422_decode.5085_18	Q9UHF4	0.3272	-0.311	0.311	0.09566	-0.2644	-0.03246	-0.0574	-0.03989	0.01702	-0.3927	-0.3671	-0.1987	-0.1056	IL20RA	cluster 5
ADAMTS1	uniprot.Q9UHI8_ukb.OID30528_decode.3174_2	Q9UHI8	0.02797	-0.01564	0.01564	-0.06465	-0.1262	-0.09316	-0.09428	-0.1098	-0.2142	-0.1727	-0.01049	0.06327	0.01468	ADAMTS1	cluster 4
CEMIP2	uniprot.Q9UHN6_ukb.OID30499_decode.8992_1	Q9UHN6	-0.05997	0.06317	-0.06317	-0.03641	0.02385	-0.01921	-0.0146	-0.01787	-0.16	0.03094	0.1412	0.2423	-0.02121	CEMIP2	cluster 3
ADGRE2	uniprot.Q9UHX3_ukb.OID20755_decode.4546_27	Q9UHX3	-0.08529	0.1003	-0.1003	-0.2113	-0.1861	-0.2168	-0.2179	0.09233	0.02738	-0.0748	-0.08828	0.01034	0.003828	ADGRE2	cluster 2
CPA4	uniprot.Q9UI42_ukb.OID30606_decode.9267_2	Q9UI42	0.01316	-0.00627	0.00627	-0.08639	-0.1368	-0.1167	-0.1219	-0.05944	-0.04301	-0.05404	-0.0153	-0.03166	-0.02614	CPA4	cluster 4
CD84	uniprot.Q9UIB8_ukb.OID20607_decode.NA	Q9UIB8	-0.1454	0.1498	-0.1498	-0.1312	-0.01262	-0.09724	-0.09196	0.01315	-0.09368	0.07485	0.1254	0.05482	0.02007	CD84	cluster 2
ATP5IF1	uniprot.Q9UII2_ukb.OID20760_decode.NA	Q9UII2	-0.09136	0.09553	-0.09553	-0.02404	0.07054	0.01244	0.01643	0.04009	-0.1258	0.1214	0.1892	0.06872	0.004655	ATP5IF1	cluster 3
DAPK2	uniprot.Q9UIK4_ukb.OID30505_decode.4355_13	Q9UIK4	-0.09358	0.09468	-0.09468	-0.09079	-0.003909	-0.06496	-0.06203	0.04821	-0.1179	0.03519	0.1101	0.07894	0.02917	DAPK2	cluster 3
ENPP5	uniprot.Q9UJA9_ukb.OID20736_decode.6556_5	Q9UJA9	0.3048	-0.3068	0.3068	0.2357	-0.02835	0.1579	0.1428	0.1094	0.1618	-0.05797	-0.1612	-0.1892	-0.0544	ENPP5	cluster 5
DBNL	uniprot.Q9UJU6_ukb.OID20681_decode.4978_54	Q9UJU6	-0.03508	0.03678	-0.03678	0.04803	0.1138	0.08286	0.08618	0.09576	-0.04054	0.0906	0.1041	0.02261	-0.02954	DBNL	cluster 3
NAGPA	uniprot.Q9UK23_ukb.OID30643_decode.11208_15	Q9UK23	0.1716	-0.1751	0.1751	0.2138	0.08799	0.1805	0.1777	0.1081	0.03069	0.004282	-0.01088	0.05344	-0.1893	NAGPA	cluster 5
ANGPTL2	uniprot.Q9UKU9_ukb.OID20726_decode.NA	Q9UKU9	-0.2749	0.2885	-0.2885	-0.2934	-0.07278	-0.2315	-0.2211	-0.1094	-0.3309	-0.09403	0.1373	0.306	0.009151	ANGPTL2	cluster 2
ITGA11	uniprot.Q9UKX5_ukb.OID20581_decode.NA	Q9UKX5	0.2633	-0.2633	0.2633	0.1378	-0.118	0.05009	0.03454	-0.004637	0.1804	-0.05729	-0.1691	-0.1967	0.0336	ITGA11	cluster 5
HEG1	uniprot.Q9ULI3_ukb.OID30579_decode.NA	Q9ULI3	-0.06293	0.07054	-0.07054	-0.07133	-0.01837	-0.05633	-0.05274	-0.0213	-0.1772	-0.009872	0.1148	0.1647	0.002434	HEG1	cluster 3
MMP17	uniprot.Q9ULZ9_ukb.NA_decode.2838_53	Q9ULZ9	-0.2069	0.2013	-0.2013	-0.1177	0.07604	-0.049	-0.03643	-0.07066	-0.01294	0.1153	0.1189	0.05034	-0.03823	MMP17	cluster 4
CLEC4A	uniprot.Q9UMR7_ukb.OID20573_decode.8853_2	Q9UMR7	0.0434	-0.05292	0.05292	0.08052	0.05773	0.077	0.07769	0.02275	0.1691	0.03704	-0.08455	-0.1305	0.04475	CLEC4A	cluster 5
DAPP1	uniprot.Q9UN19_ukb.OID20524_decode.11615_16	Q9UN19	-0.01404	0.01455	-0.01455	0.0434	0.07713	0.06746	0.06683	-0.01879	-0.03263	0.03527	0.05578	0.0311	-0.00286	DAPP1	cluster 3
EDAR	uniprot.Q9UNE0_ukb.OID20525_decode.2977_7	Q9UNE0	-0.006953	0.01054	-0.01054	-0.004015	-0.0002455	0.002595	0.001045	0.0222	0.01779	-0.01168	-0.02328	-0.02315	-7.01e-05	EDAR	cluster 4
STX8	uniprot.Q9UNK0_ukb.OID20531_decode.10903_50	Q9UNK0	-0.1794	0.1911	-0.1911	-0.2431	-0.1161	-0.2137	-0.2111	0.004672	-0.171	0.09126	0.1873	0.1122	0.09936	STX8	cluster 2
CEP164	uniprot.Q9UPV0_ukb.OID20441_decode.NA	Q9UPV0	0.09182	-0.08968	0.08968	-0.1643	-0.2791	-0.2302	-0.2389	-0.04461	-0.1154	0.07772	0.1497	0.02834	0.2484	CEP164	cluster 2
FOXJ3	uniprot.Q9UPW0_ukb.OID30445_decode.NA	Q9UPW0	-0.1435	0.1419	-0.1419	-0.07183	0.07696	-0.01454	-0.01093	0.04987	-0.1993	0.08403	0.2047	0.1533	-0.03991	FOXJ3	cluster 3
LAMP3	uniprot.Q9UQV4_ukb.OID20638_decode.NA	Q9UQV4	-0.2704	0.2844	-0.2844	-0.39	-0.2209	-0.3626	-0.3536	-0.09322	-0.177	0.02315	0.1446	0.1547	0.1083	LAMP3	cluster 6
CCL26	uniprot.Q9Y258_ukb.OID20546_decode.9168_31	Q9Y258	-0.1402	0.1391	-0.1391	-0.06566	0.06837	-0.02341	-0.01553	0.02476	-0.09955	-0.01648	0.05076	0.05762	-0.01097	CCL26	cluster 3
NUDC	uniprot.Q9Y266_ukb.OID20623_decode.8887_21	Q9Y266	-0.1262	0.1263	-0.1263	-0.0495	0.08471	0.0006363	0.006761	0.08463	-0.08466	0.12	0.1582	0.08872	-0.01348	NUDC	cluster 3
PIKFYVE	uniprot.Q9Y2I7_ukb.OID30465_decode.NA	Q9Y2I7	-0.1037	0.1017	-0.1017	-0.01731	0.09346	0.02581	0.03071	0.06347	-0.06306	0.09208	0.1282	0.08155	-0.03142	PIKFYVE	cluster 3
PADI2	uniprot.Q9Y2J8_ukb.OID20467_decode.NA	Q9Y2J8	-0.01258	0.04743	-0.04743	-0.2068	-0.2705	-0.2422	-0.2464	-0.0128	-0.2924	-0.2072	0.001797	0.256	0.06964	PADI2	cluster 2
AXIN2	uniprot.Q9Y2T1_ukb.NA_decode.12925_105	Q9Y2T1	-0.1492	0.1424	-0.1424	-0.07634	0.06782	-0.02405	-0.01715	-0.09106	-0.02792	0.06402	0.07312	0.06522	0.001863	AXIN2	cluster 4
GIT1	uniprot.Q9Y2X7_ukb.OID30533_decode.NA	Q9Y2X7	-0.08798	0.08459	-0.08459	-0.00783	0.08639	0.02884	0.03373	0.05101	-0.01509	0.06582	0.06603	0.04839	-0.02186	GIT1	cluster 3
MRPS16	uniprot.Q9Y3D3_ukb.OID30489_decode.NA	Q9Y3D3	-0.0654	0.06081	-0.06081	0.03817	0.1213	0.06496	0.06033	-0.08236	-0.02047	0.1958	0.1996	0.04974	0.04207	MRPS16	cluster 3
FIS1	uniprot.Q9Y3D6_ukb.OID20722_decode.17746_77	Q9Y3D6	-0.01211	0.01592	-0.01592	-0.007534	0.0046	-0.0027	-0.001957	0.1252	0.001902	0.09634	0.0742	0.0595	0.009958	FIS1	cluster 3
SIT1	uniprot.Q9Y3P8_ukb.OID20462_decode.11194_6	Q9Y3P8	-0.233	0.2399	-0.2399	-0.241	-0.0471	-0.1886	-0.179	-0.05451	-0.214	-0.01633	0.1293	0.2194	0.02467	SIT1	cluster 2
PRKAB1	uniprot.Q9Y478_ukb.OID20444_decode.NA	Q9Y478	-0.1431	0.152	-0.152	-0.1786	-0.07248	-0.1553	-0.1519	0.07791	-0.1415	0.1201	0.1972	0.1694	0.06844	PRKAB1	cluster 2
KDM3A	uniprot.Q9Y4C1_ukb.OID30426_decode.NA	Q9Y4C1	0.004101	-0.0004517	0.0004516	-0.01075	-0.02573	-0.01686	-0.02235	0.04489	-0.01872	-0.0314	-0.01752	0.004726	-0.06191	KDM3A	cluster 4
DAAM1	uniprot.Q9Y4D1_ukb.OID30664_decode.NA	Q9Y4D1	-0.073	0.0737	-0.0737	-0.02698	0.04589	0.0004785	0.003074	0.057	-0.09247	0.07173	0.1282	0.08441	0.01171	DAAM1	cluster 3
CCL27	uniprot.Q9Y4X3_ukb.OID20121_decode.2192_63	Q9Y4X3	0.006491	0.0009697	-0.0009697	-0.07652	-0.1116	-0.09973	-0.09941	0.02644	-0.1159	0.05509	0.1303	0.05525	0.1109	CCL27	cluster 4
NUB1	uniprot.Q9Y5A7_ukb.OID20510_decode.NA	Q9Y5A7	-0.1244	0.1263	-0.1263	-0.03937	0.08465	0.005546	0.01124	0.05475	-0.113	0.1255	0.1817	0.09792	-0.01662	NUB1	cluster 3
LYVE1	uniprot.Q9Y5Y7_ukb.OID30728_decode.3206_4	Q9Y5Y7	0.0106	-0.005811	0.005811	-0.06334	-0.08992	-0.08153	-0.08428	-0.06208	-0.02792	0.01912	0.03894	-0.01754	0.05993	LYVE1	cluster 4
IKBKG	uniprot.Q9Y6K9_ukb.OID20544_decode.NA	Q9Y6K9	-0.07292	0.0719	-0.0719	0.006637	0.09068	0.03816	0.043	0.04382	-0.1097	0.108	0.1661	0.04248	-0.04116	IKBKG	cluster 3
ROBO1	uniprot.Q9Y6N7_ukb.OID20734_decode.5740_17	Q9Y6N7	-0.03468	0.04289	-0.04289	-0.1084	-0.1039	-0.1167	-0.1156	0.004994	-0.07574	-0.06253	-0.00365	0.03081	-0.01763	ROBO1	cluster 4
TNFRSF11A	uniprot.Q9Y6Q6_ukb.OID20646_decode.NA	Q9Y6Q6	-0.3439	0.3635	-0.3635	-0.531	-0.3152	-0.4962	-0.4873	-0.1409	-0.2032	-0.004174	0.133	0.2298	0.2598	TNFRSF11A	cluster 6

## Sheet: ST5
Supplementary Table 5. P value from z scores from LDSC analysis.
protein	p2	UniProt	INT_eGFRdiff	INT_eGFRdiff.mean	INT_eGFRdiff.pct.cr	INT_eGFRcys	INT_eGFRcr	INT_eGFRcc	INT_eGFRmean	INT_UACR	INT_UK_UCR	INT_UNA_UCR	INT_UNA_UK	INT_Urate	INT_Urea	p_Assay_unique	Cluster
FUOM	uniprot.A2VDF0_ukb.OID30626_decode.NA	A2VDF0	1.97e-05	1.05e-05	1.05e-05	0.000147145	0.818191	0.00835967	0.0177526	0.897733	6.07e-05	0.986319	0.0168452	1.02e-08	0.943719	FUOM	cluster 2
PINLYP	uniprot.A6NC86_ukb.OID30651_decode.NA	A6NC86	0.0134184	0.00704457	0.00704457	0.000407134	0.107944	0.00246882	0.00321222	0.838477	0.0103656	0.920898	0.120989	0.0101016	0.914032	PINLYP	cluster 3
ISM1	uniprot.B1AKI9_ukb.OID20538_decode.8355_80	B1AKI9	0.00269882	0.00131938	0.00131938	9.84e-07	0.00014569	5.29e-07	5.6e-07	0.857613	0.00973461	0.431712	0.747257	0.180712	0.610979	ISM1	cluster 2
DDX39A	uniprot.O00148_ukb.OID30494_decode.NA	O00148	0.324647	0.290607	0.290607	0.323144	0.680803	0.413117	0.459003	0.815515	0.567382	0.937857	0.600897	0.972026	0.783322	DDX39A	cluster 5
CCL24	uniprot.O00175_ukb.OID20772_decode.4128_27	O00175	0.0955849	0.0900698	0.0900698	0.074886	0.666872	0.125459	0.158947	0.756032	0.536393	0.635861	0.250536	0.126801	0.280299	CCL24	cluster 3
LGALS9	uniprot.O00182_ukb.OID20781_decode.9197_4	O00182	2.65e-07	1.74e-07	1.74e-07	1.21e-14	4.2e-14	4.64e-20	3.95e-21	0.102909	8.66e-07	0.955118	0.000200013	9.49e-10	1.89e-05	LGALS9	cluster 6
TLR4	uniprot.O00206_ukb.OID30428_decode.11101_18	O00206	0.663268	0.556086	0.556086	0.253059	0.392122	0.230225	0.257392	0.630056	0.413624	0.757666	0.992955	0.976281	0.797768	TLR4	cluster 4
TNFRSF10A	uniprot.O00220_ukb.OID20967_decode.4832_75	O00220	1.86e-05	1.32e-05	1.32e-05	2.2e-07	0.00483075	2.92e-07	4.57e-07	0.437812	1.71e-05	0.904822	0.00238016	7.99e-05	0.00338297	TNFRSF10A	cluster 6
SIRPB1	uniprot.O00241_ukb.OID20739_decode.6247_9	O00241	0.00154431	0.00107256	0.00107256	3.44e-06	1.33e-06	5.24e-07	4.36e-07	0.0871096	0.0154779	0.531026	0.697762	0.0290929	0.00041686	SIRPB1	cluster 6
AGRP	uniprot.O00253_ukb.OID20658_decode.2813_11	O00253	0.330754	0.246365	0.246365	0.00306123	0.00255073	0.00114304	0.00106486	0.611914	0.716392	0.835453	0.489116	0.0102619	0.309999	AGRP	cluster 4
DFFA	uniprot.O00273_ukb.OID20620_decode.NA	O00273	0.00156101	0.00181592	0.00181592	0.508095	0.00982177	0.761491	0.650706	0.675263	0.168916	0.431712	0.0492069	0.0609492	0.824891	DFFA	cluster 3
TNFRSF11B	uniprot.O00300_ukb.OID20735_decode.8304_50	O00300	0.280684	0.338905	0.338905	0.637147	0.605959	0.865585	0.915758	0.381605	0.174068	0.920524	0.179278	0.353211	0.21329	TNFRSF11B	cluster 3
MATN2	uniprot.O00339_ukb.OID20767_decode.3325_2	O00339	0.886387	0.75741	0.757302	0.0281697	0.00258617	0.00320157	0.00267354	0.843797	0.20765	0.914877	0.570705	0.099325	0.767815	MATN2	cluster 4
QSOX1	uniprot.O00391_ukb.OID30729_decode.NA	O00391	0.217689	0.219825	0.219825	0.271869	0.324552	0.307628	0.309066	0.555948	0.17194	0.547967	0.600562	0.356804	0.772429	QSOX1	cluster 2
WASL	uniprot.O00401_ukb.OID30467_decode.NA	O00401	0.236646	0.309855	0.309855	0.67154	0.0444017	0.351342	0.279132	0.711881	0.937629	0.928446	0.911935	0.856949	0.98696	WASL	cluster 4
AGRN	uniprot.O00468_ukb.OID20786_decode.15483_377	O00468	3.33e-06	3.32e-06	3.32e-06	5.88e-08	0.000149907	1.04e-07	1.46e-07	0.140968	2.08e-05	0.748972	0.000591273	3.03e-07	0.000526069	AGRN	cluster 6
CCL21	uniprot.O00585_ukb.OID20686_decode.2516_57	O00585	3.32e-06	2.93e-06	2.93e-06	2.86e-08	0.108492	6.29e-07	1.74e-06	0.288971	0.0495816	0.944187	0.193425	0.00184529	0.116784	CCL21	cluster 2
FCN1	uniprot.O00602_ukb.OID30690_decode.15582_25	O00602	0.0243984	0.0219069	0.0219069	0.0175249	0.397199	0.0276497	0.0341578	0.55342	0.0048096	0.920898	0.0591998	0.00345971	0.852184	FCN1	cluster 2
CCL22	uniprot.O00626_ukb.OID20765_decode.3508_78	O00626	1.97e-10	1.65e-10	1.65e-10	4.5e-14	0.0315477	8.03e-12	4.94e-11	0.846703	9.09e-10	0.577399	6.99e-07	6.2e-09	0.473265	CCL22	cluster 2
CXCL11	uniprot.O14625_ukb.OID21042_decode.3038_9	O14625	0.0040154	0.00437812	0.00437812	0.0339449	0.23051	0.200977	0.259176	0.0871096	0.736537	0.731656	0.520628	0.248166	0.750179	CXCL11	cluster 3
SLC9A3R1	uniprot.O14745_ukb.OID30630_decode.NA	O14745	0.00331656	0.00328447	0.00328447	0.0886572	0.320887	0.509141	0.587461	0.773358	0.203385	0.4854	0.0868859	0.0134883	0.693909	SLC9A3R1	cluster 3
TPP1	uniprot.O14773_ukb.OID20750_decode.17691_1	O14773	8.68e-06	8.72e-06	8.72e-06	0.00242124	6.2e-05	0.646398	0.860848	0.0227252	0.132162	0.469955	0.0406021	8.1e-05	0.0664413	TPP1	cluster 3
TNFSF11	uniprot.O14788_ukb.OID20592_decode.14061_48	O14788	0.033493	0.0257689	0.0257689	0.00213155	0.10569	0.00197318	0.00276408	0.74681	0.011412	0.0176119	0.321125	0.162036	0.572362	TNFSF11	cluster 4
TNFRSF13B	uniprot.O14836_ukb.OID20702_decode.2704_74	O14836	1.41e-05	9.71e-06	9.71e-06	7.64e-12	6.39e-12	8.39e-16	1.9e-16	0.381605	0.000189374	0.544068	0.204728	1.22e-05	3.76e-09	TNFRSF13B	cluster 6
BACH1	uniprot.O14867_ukb.OID20505_decode.12451_62	O14867	0.00678678	0.00757876	0.00757876	0.0339449	0.194434	0.471014	0.649236	0.887049	0.276408	0.571458	0.261723	0.176925	0.943719	BACH1	cluster 3
WNT9A	uniprot.O14904_ukb.OID20460_decode.NA	O14904	0.639178	0.344654	0.344654	3.89e-08	1.74e-16	1.03e-11	2.82e-12	0.450879	0.00300391	0.0157593	0.331022	0.238734	0.000118893	WNT9A	cluster 2
AXIN1	uniprot.O15169_ukb.OID20582_decode.NA	O15169	0.0552002	0.0561289	0.0561289	0.9951	0.0679271	0.531988	0.477541	0.675263	0.178067	0.469955	0.0916396	0.317853	0.824891	AXIN1	cluster 3
CHAD	uniprot.O15335_ukb.OID30660_decode.13460_4	O15335	0.161055	0.202883	0.202883	0.00282868	4.34e-10	1.39e-06	4.36e-07	0.549694	0.192143	0.431712	0.544826	0.00996927	0.611434	CHAD	cluster 4
STX7	uniprot.O15400_ukb.OID30560_decode.8274_64	O15400	0.0553356	0.0440643	0.0440643	0.00118777	0.0632785	0.00245708	0.00274886	0.831757	0.0490631	0.932756	0.325868	0.0716203	0.379015	STX7	cluster 2
TLR3	uniprot.O15455_ukb.OID20612_decode.16918_198	O15455	NA	NA	NA	NA	NA	NA	NA	NA	NA	NA	NA	NA	NA	TLR3	#N/A
ADAM12	uniprot.O43184_ukb.OID30491_decode.4420_7	O43184	0.00629587	0.00504022	0.00504022	0.000759405	0.0315743	0.00113634	0.00126197	0.437812	0.00965442	0.473097	0.456412	0.00172978	0.254755	ADAM12	cluster 6
SPINT2	uniprot.O43291_ukb.OID20720_decode.2843_13	O43291	0.00105492	0.000419984	0.000419984	6.82e-10	8.03e-05	6e-10	1.13e-09	0.934953	0.129492	0.833185	0.516072	0.311725	0.0247269	SPINT2	cluster 2
FGF16	uniprot.O43320_ukb.OID30535_decode.4393_3	O43320	0.886387	0.827401	0.827401	0.623133	0.840408	0.781911	0.763656	0.781469	0.876434	0.70683	0.665123	0.176214	0.720667	FGF16	cluster 4
TPD52L2	uniprot.O43399_ukb.OID30609_decode.NA	O43399	0.00109563	0.00117918	0.00117918	0.269235	0.0570845	0.992882	0.93083	0.708171	0.136152	0.536007	0.0733879	0.0337937	0.998769	TPD52L2	cluster 3
TGOLN2	uniprot.O43493_ukb.OID30691_decode.NA	O43493	1.48e-07	5.32e-08	5.32e-08	2.49e-23	4.25e-28	5.26e-34	1.53e-35	4.66e-07	7.76e-08	0.536007	0.110912	0.00256085	7.94e-06	TGOLN2	cluster 6
TNFSF12	uniprot.O43508_ukb.OID20624_decode.5939_42	O43508	0.00886323	0.00973187	0.00973187	0.221321	0.106855	0.872022	0.986057	0.679991	0.3455	0.434892	0.0507714	0.000458433	0.519129	TNFSF12	cluster 4
BCL2L11	uniprot.O43521-2_ukb.OID20513_decode.NA	O43521-2	0.00401564	0.00336279	0.00336313	6.13e-05	0.00192965	4.76e-05	5.19e-05	0.715917	0.261441	0.887625	0.347384	0.0975272	0.0282267	BCL2L11	cluster 2
LAT	uniprot.O43561_ukb.OID20640_decode.10551_7	O43561	0.0300165	0.025357	0.025357	0.277783	0.339313	0.825649	0.882755	0.802163	0.0511795	0.943549	0.213636	0.0685997	0.646377	LAT	cluster 3
DENR	uniprot.O43583_ukb.OID30493_decode.19287_59	O43583	0.730878	0.717918	0.717918	0.896251	0.767298	0.954724	0.973042	0.454611	0.777981	0.70683	0.485113	0.318893	0.943719	DENR	cluster 3
SPRY2	uniprot.O43597_ukb.OID20475_decode.NA	O43597	0.0181788	0.0177823	0.0177823	0.167362	0.448138	0.593032	0.649236	0.914819	0.0762771	0.644212	0.101654	0.0639701	0.927124	SPRY2	cluster 3
DNPH1	uniprot.O43598_ukb.OID20744_decode.17785_11	O43598	0.0290992	0.0299048	0.0299048	0.315895	0.0977858	0.813975	0.897324	0.612329	0.305293	0.810775	0.424456	0.000638783	0.7679	DNPH1	cluster 3
NCK2	uniprot.O43639_ukb.OID20683_decode.13615_60	O43639	0.148838	0.148608	0.148608	0.909841	0.147126	0.641018	0.622426	0.697321	0.608051	0.710162	0.392316	0.229297	0.975432	NCK2	cluster 3
ACTN4	uniprot.O43707_ukb.OID20435_decode.NA	O43707	NA	NA	NA	NA	NA	NA	NA	NA	NA	NA	NA	NA	NA	ACTN4	#N/A
ITM2A	uniprot.O43736_ukb.OID20504_decode.7765_15	O43736	0.00140847	0.0012013	0.0012013	0.000153752	0.0315477	0.000302464	0.000351551	0.560629	0.035113	0.554865	0.61004	0.00318124	0.0140621	ITM2A	cluster 2
CD5L	uniprot.O43866_ukb.OID30775_decode.3293_2	O43866	0.00229741	0.00180213	0.00180213	0.000275688	0.0346714	0.000357628	0.000510165	0.596716	0.136152	0.249403	0.243361	0.178647	0.945313	CD5L	cluster 2
BNIP3L	uniprot.O60238_ukb.OID30525_decode.7835_2	O60238	0.0301757	0.0282948	0.0282948	0.058658	0.996125	0.227662	0.258843	0.978276	0.211833	0.671611	0.170763	0.603997	0.949182	BNIP3L	cluster 2
SUSD5	uniprot.O60279_ukb.OID30650_decode.NA	O60279	0.341377	0.181518	0.181518	0.00100988	0.00184266	0.00105057	0.00106895	0.527872	0.258172	0.225393	0.199695	0.232807	0.294021	SUSD5	cluster 2
PPL	uniprot.O60437_ukb.OID30564_decode.NA	O60437	0.000720516	0.00032784	0.00032784	3.12e-13	5.59e-12	5.23e-17	2.78e-17	0.446792	1.08e-06	0.864627	0.00163442	2.8e-14	0.00878858	PPL	cluster 6
EVI5	uniprot.O60447_ukb.OID30519_decode.NA	O60447	0.0552066	0.0494593	0.0494593	0.623133	0.192123	0.844531	0.802977	0.780717	0.206058	0.431712	0.0562255	0.230501	0.939285	EVI5	cluster 3
LY75	uniprot.O60449_ukb.OID20580_decode.16620_26	O60449	0.273826	0.277637	0.277637	0.509124	0.835401	0.616211	0.649236	0.651694	0.949007	0.70683	0.535533	0.620825	0.58578	LY75	cluster 3
NPHS1	uniprot.O60500_ukb.OID30540_decode.NA	O60500	0.0687129	0.0473053	0.0473053	3.44e-07	1.15e-10	3.87e-09	1.16e-09	0.281633	0.612345	0.66338	0.344177	0.856271	0.000122506	NPHS1	cluster 5
PSPN	uniprot.O60542_ukb.OID20511_decode.2696_87	O60542	0.011383	0.00919537	0.00919537	0.0492611	0.632796	0.31539	0.43386	0.934953	0.395082	0.0895679	0.00259082	0.00777287	0.291091	PSPN	cluster 3
SPINK4	uniprot.O60575_ukb.OID20509_decode.19213_1	O60575	0.000170261	0.00013546	0.00013546	8.4e-07	2.51e-05	4.14e-07	3.93e-07	0.5139	0.101968	0.225393	0.00998441	0.00022998	9.51e-06	SPINK4	cluster 2
SH2D1A	uniprot.O60880_ukb.OID20514_decode.4567_82	O60880	0.00132948	0.00106625	0.00106625	3.87e-05	0.187428	0.000571907	0.000784448	0.978675	0.109985	0.817324	0.172078	0.00351267	0.76847	SH2D1A	cluster 2
DNAJA2	uniprot.O60884_ukb.OID20627_decode.11582_63	O60884	0.0850461	0.0792718	0.0792718	0.609674	0.253976	0.880101	0.859044	0.721848	0.613534	0.735551	0.421605	0.0870975	0.510907	DNAJA2	cluster 3
NBN	uniprot.O60934_ukb.OID20442_decode.NA	O60934	0.000813467	0.000851461	0.000851461	0.000225882	0.751449	0.00323766	0.00608342	0.920477	0.148755	0.940972	0.447657	0.00277387	0.611434	NBN	cluster 2
ADAM23	uniprot.O75077_ukb.OID20651_decode.7049_2	O75077	0.033159	0.0466288	0.0466288	0.118609	0.00988314	0.0268332	0.0231446	0.702188	0.15296	0.469955	0.732743	0.225213	0.157802	ADAM23	cluster 4
ADAMTS4	uniprot.O75173_ukb.OID30471_decode.2809_25	O75173	0.000572645	0.000286827	0.000286827	2.66e-06	0.0169585	3.9e-06	6.26e-06	0.798906	0.00169322	0.575373	0.00818263	0.000667078	0.0205313	ADAMTS4	cluster 2
DNAJB6	uniprot.O75190_ukb.OID30613_decode.11606_22	O75190	0.0384754	0.0404121	0.0404121	0.845453	0.0383633	0.518712	0.462971	0.437812	0.300687	0.473097	0.116259	0.101205	0.693106	DNAJB6	cluster 3
TBCA	uniprot.O75347_ukb.OID30616_decode.12501_10	O75347	0.180895	0.193277	0.193277	0.935546	0.227415	0.624515	0.565719	0.715917	0.665515	0.757666	0.494468	0.876539	0.820789	TBCA	cluster 3
PTP4A3	uniprot.O75365_ukb.OID30469_decode.19231_22	O75365	0.0183688	0.016044	0.016044	0.024811	0.495108	0.0702715	0.0851331	0.783308	0.231588	0.841172	0.613076	0.0151004	0.16773	PTP4A3	cluster 2
CRLF1	uniprot.O75462_ukb.OID20699_decode.14747_9	O75462	0.549065	0.350397	0.350397	0.000258091	0.000166736	4.55e-05	4.24e-05	0.932878	0.112579	0.431712	0.70137	0.0119297	0.824891	CRLF1	cluster 4
PSIP1	uniprot.O75475_ukb.OID20534_decode.17176_13	O75475	3.1e-05	2.38e-05	2.38e-05	3.44e-06	0.301146	0.000119741	0.000250083	0.812032	0.0201306	0.799347	0.332242	1.31e-06	0.301397	PSIP1	cluster 2
SKAP2	uniprot.O75563_ukb.OID20761_decode.NA	O75563	0.146765	0.141659	0.141659	0.666146	0.0405452	0.28324	0.247205	0.549694	0.166902	0.431712	0.0693611	0.691965	0.697299	SKAP2	cluster 3
PPM1B	uniprot.O75688_ukb.OID30548_decode.NA	O75688	0.665688	0.627884	0.627884	0.28768	0.436946	0.314113	0.271606	0.987384	0.972326	0.840845	0.690114	0.542564	0.914032	PPM1B	cluster 3
ATRN	uniprot.O75882-2_ukb.OID30735_decode.NA	O75882-2	0.216481	0.177631	0.177631	0.959359	0.281249	0.542015	0.525554	0.936482	0.0614119	0.932756	0.13147	0.000745371	0.718745	ATRN	cluster 3
TNFSF13	uniprot.O75888_ukb.OID20733_decode.NA	O75888	0.00109563	0.000628792	0.000628792	5.88e-08	0.00194592	1.41e-07	2.11e-07	0.675263	0.0159058	0.976397	0.188552	0.674514	0.585912	TNFSF13	cluster 2
NCR1	uniprot.O76036_ukb.OID20566_decode.8360_169	O76036	0.000912266	0.000519409	0.000519409	7.44e-07	0.000232886	9.78e-07	1.27e-06	0.639845	0.0967044	0.757666	0.485113	0.0265895	0.0343551	NCR1	cluster 6
SCGN	uniprot.O76038_ukb.OID20457_decode.15305_7	O76038	0.00514449	0.00768271	0.00768271	0.344125	4.75e-05	0.0257728	0.013688	0.549694	0.534078	0.736774	0.958275	0.302887	0.0505441	SCGN	cluster 4
CST7	uniprot.O76096_ukb.OID20704_decode.3302_58	O76096	0.343921	0.334163	0.334163	0.299094	0.255023	0.310954	0.315614	0.946584	0.0569629	0.920524	0.159378	0.040177	0.778466	CST7	cluster 2
NFASC	uniprot.O94856_ukb.OID20634_decode.7179_69	O94856	0.00844863	0.00716462	0.00716462	0.0819617	0.368729	0.616674	0.728359	0.427373	0.593179	0.839819	0.516892	0.002069	0.686032	NFASC	cluster 3
NFAT5	uniprot.O94916_ukb.OID30522_decode.NA	O94916	0.9985	0.988387	0.988387	0.586023	0.556298	0.602795	0.625403	0.914819	0.430916	0.61475	0.261191	0.987663	0.943719	NFAT5	cluster 3
HEXIM1	uniprot.O94992_ukb.OID20589_decode.15596_7	O94992	0.00169262	0.00131938	0.00131938	0.0945468	0.399126	0.520135	0.61484	0.640315	0.213336	0.589346	0.179278	0.043163	0.999	HEXIM1	cluster 3
NXPH3	uniprot.O95157_ukb.OID30565_decode.6054_6	O95157	0.574993	0.696163	0.696163	0.00209203	7.88e-06	7.1e-05	3.23e-05	0.281633	0.549656	0.431712	0.337324	0.0160879	0.00616599	NXPH3	cluster 4
TNFAIP8	uniprot.O95379_ukb.OID20433_decode.12563_2	O95379	0.396473	0.419699	0.419699	0.869012	0.149852	0.490005	0.453478	0.714681	0.688782	0.937857	0.936617	0.299646	0.963938	TNFAIP8	cluster 3
BMP10	uniprot.O95393_ukb.OID30575_decode.3587_53	O95393	0.00401564	0.00404178	0.00404178	0.00489339	0.387818	0.0974376	0.16304	0.609565	0.00541078	0.231191	0.000648494	0.00711855	0.238272	BMP10	cluster 5
BAG4	uniprot.O95429_ukb.OID30474_decode.12844_10	O95429	0.0168963	0.0175591	0.0175591	0.273741	0.214281	0.822405	0.859576	0.789796	0.920619	0.619418	0.479445	0.0755138	0.473184	BAG4	cluster 3
VNN1	uniprot.O95497_ukb.OID30711_decode.NA	O95497	0.00139603	0.00141497	0.00141497	0.0558764	0.134214	0.510709	0.648986	0.828129	0.0481514	0.473097	0.0185008	1.5e-07	0.801835	VNN1	cluster 2
FSTL3	uniprot.O95633_ukb.OID20782_decode.3438_10	O95633	3.76e-08	1.73e-08	1.73e-08	4.13e-22	2.84e-43	6.94e-37	8.42e-40	7.96e-05	1.33e-10	0.431712	0.0818246	6.11e-06	1.89e-05	FSTL3	cluster 6
NFATC1	uniprot.O95644_ukb.OID20545_decode.14286_2	O95644	0.00775854	0.00916152	0.00916152	0.471802	0.136551	0.877616	0.787806	0.897733	0.240979	0.457185	0.107085	0.0975272	0.76847	NFATC1	cluster 3
CXCL14	uniprot.O95715_ukb.OID20458_decode.5730_60	O95715	0.0335894	0.030738	0.030738	0.00124384	0.0167335	0.000749777	0.000835302	0.957369	0.199974	0.469955	0.0435551	0.040177	0.00987627	CXCL14	cluster 2
FGF19	uniprot.O95750_ukb.OID20715_decode.13724_27	O95750	0.0490979	0.0464943	0.0464943	0.513906	0.288782	0.880101	0.846904	0.897733	0.0454119	0.901546	0.250536	0.174432	0.434484	FGF19	cluster 4
IL33	uniprot.O95760_ukb.OID20428_decode.NA	O95760	0.812494	0.748872	0.748872	0.236874	0.240882	0.244005	0.240237	0.966967	0.787486	0.934108	0.780944	0.927501	0.772429	IL33	cluster 2
LATS1	uniprot.O95835_ukb.OID30523_decode.NA	O95835	0.00109563	0.00112965	0.00112965	0.169207	0.0647493	0.877616	0.959063	0.675263	0.156314	0.469955	0.0590377	0.000440729	0.834156	LATS1	cluster 3
CD160	uniprot.O95971_ukb.OID20647_decode.17677_47	O95971	5.06e-07	2.95e-07	2.95e-07	4.13e-17	2.65e-13	1.36e-22	2.67e-23	0.0263961	0.00153855	0.453455	0.563755	0.000145382	0.000111922	CD160	cluster 6
IL18BP	uniprot.O95998_ukb.OID20348_decode.3073_51	O95998	8.96e-08	2.81e-08	2.81e-08	1.63e-27	3.63e-22	1.42e-42	8.34e-44	0.578611	0.000101271	0.59303	0.162114	0.000159457	0.0136335	IL18BP	cluster 6
MOCS2	uniprot.O96007_ukb.OID30638_decode.NA	O96007	0.223828	0.228895	0.228895	0.303571	0.891881	0.39463	0.439963	0.756032	0.0728727	0.66338	0.140571	0.223133	0.990289	MOCS2	cluster 3
ADH1B	uniprot.P00325_ukb.OID30612_decode.9834_62	P00325	0.0029371	0.00157247	0.00157247	0.000288206	0.290019	0.00190867	0.00321222	0.679734	4.16e-07	0.934108	0.00249545	5.19e-13	0.943719	ADH1B	cluster 2
GSR	uniprot.P00390_ukb.OID30700_decode.19273_3	P00390	0.080832	0.0796476	0.0796476	0.257141	0.765279	0.598017	0.649236	0.883099	0.981607	0.930747	0.987826	0.548815	0.377334	GSR	cluster 4
C1R	uniprot.P00736_ukb.OID30753_decode.3285_23	P00736	0.114529	0.111093	0.111093	0.193212	0.840408	0.429101	0.49659	0.102909	0.00650618	0.930747	0.0515029	0.0387918	0.702198	C1R	cluster 2
CFD	uniprot.P00746_ukb.OID30738_decode.2946_52	P00746	1.01e-06	5.06e-07	5.06e-07	2.61e-14	1.53e-19	1.37e-19	2.27e-20	4.66e-07	1.09e-07	0.469955	0.056831	0.000132056	8.25e-08	CFD	cluster 6
F12	uniprot.P00748_ukb.OID30739_decode.NA	P00748	0.0530711	0.0499462	0.0499462	0.77909	0.473293	0.902453	0.86881	0.807023	0.33413	0.70683	0.264688	0.000720787	0.71178	F12	cluster 3
PLAU	uniprot.P00749_ukb.NA_decode.4158_54	P00749	0.440862	0.436235	0.436235	0.724479	0.532904	0.930297	0.938057	0.950655	0.0768248	0.920524	0.167047	0.30977	0.818613	PLAU	cluster 4
CFB	uniprot.P00751_ukb.OID30755_decode.4129_72	P00751	0.0159651	0.0149519	0.0149519	0.0890937	0.0315477	0.731497	0.954221	0.76702	0.0054575	0.531026	0.00519408	9.66e-06	0.730505	CFB	cluster 2
ADA	uniprot.P00813_ukb.OID20645_decode.NA	P00813	0.00703541	0.00504022	0.00504022	3.3e-05	0.0102198	3.08e-05	4.03e-05	0.928909	0.0768248	0.528109	0.0321723	1.35e-06	0.427163	ADA	cluster 2
SERPINC1	uniprot.P01008_ukb.OID30789_decode.3344_60	P01008	1.15e-06	4.57e-07	4.57e-07	1.57e-10	0.0677936	6.12e-08	2.52e-07	0.578611	0.358893	0.577399	0.770368	0.000956247	0.367809	SERPINC1	cluster 5
SERPINA1	uniprot.P01009_ukb.OID30750_decode.3580_25	P01009	0.18293	0.147241	0.147241	0.0225321	0.31063	0.0627279	0.0722116	0.675263	0.44194	0.785352	0.392316	2.22e-05	0.0115206	SERPINA1	cluster 5
AGT	uniprot.P01019_ukb.OID30709_decode.3484_60	P01019	0.00661721	0.00657385	0.00657385	0.0225321	0.770399	0.0857906	0.122942	0.549694	0.120546	0.463674	0.756478	0.349283	0.992132	AGT	cluster 5
CST1	uniprot.P01037_ukb.OID30581_decode.5459_33	P01037	0.113451	0.155841	0.155841	0.0408879	9.12e-05	0.00437245	0.00235497	0.67094	0.586293	0.234301	0.0218892	0.0981952	0.667229	CST1	cluster 4
PDGFB	uniprot.P01127_ukb.OID20741_decode.4149_8	P01127	0.0175069	0.0153352	0.0153352	0.403645	0.219906	0.877616	0.950311	0.781469	0.077261	0.887625	0.443812	0.738618	0.783322	PDGFB	cluster 3
EGF	uniprot.P01133_ukb.OID20698_decode.5509_7	P01133	0.527967	0.549232	0.549232	0.314146	0.0204572	0.102128	0.0884815	0.560629	0.431566	0.757666	0.347384	0.989346	0.585912	EGF	cluster 3
TGFA	uniprot.P01135_ukb.OID20600_decode.NA	P01135	3.16e-07	1.74e-07	1.74e-07	3.3e-13	8.74e-05	3.44e-15	6.83e-15	0.633929	1.11e-05	0.473709	0.000315712	5.56e-12	0.00041686	TGFA	cluster 6
TGFB1	uniprot.P01137_ukb.OID20621_decode.2333_72	P01137	4.1e-05	3.25e-05	3.25e-05	9.29e-08	0.28315	2.11e-06	4.79e-06	0.981864	0.0614119	0.469955	0.0230197	0.000830901	0.797768	TGFB1	cluster 2
NGF	uniprot.P01138_ukb.OID20920_decode.5801_72	P01138	0.588625	0.578446	0.578446	0.233674	0.515671	0.315184	0.314011	0.974505	0.417226	0.920898	0.378873	0.172201	0.755962	NGF	cluster 4
PENK	uniprot.P01210_ukb.OID30666_decode.9076_25	P01210	0.00431467	0.00272724	0.00272724	2.2e-05	6.05e-06	8.09e-06	6.95e-06	0.0127635	0.00272431	0.776545	0.0686987	0.000269997	0.00239728	PENK	cluster 6
LTA	uniprot.P01374_ukb.OID20586_decode.4703_87	P01374	0.00014734	0.000109756	0.000109756	8.93e-06	0.522517	0.000239027	0.000433956	0.737779	0.141881	0.943549	0.327897	0.023088	0.493516	LTA	cluster 2
IFNG	uniprot.P01579_ukb.OID20495_decode.15346_31	P01579	6.35e-05	7.19e-05	7.19e-05	0.00079324	0.661718	0.0752884	0.109405	0.651694	0.827627	0.431712	0.20008	0.00118065	0.240562	IFNG	cluster 2
IL1A	uniprot.P01583_ukb.OID20488_decode.4851_25	P01583	NA	NA	NA	NA	NA	NA	NA	NA	NA	NA	NA	NA	NA	IL1A	#N/A
IL1B	uniprot.P01584_ukb.OID20427_decode.3037_62	P01584	0.496669	0.493183	0.493183	0.603553	0.66331	0.796296	0.811583	0.781469	0.577131	0.9992	0.643845	0.75653	0.945313	IL1B	cluster 2
EPO	uniprot.P01588_ukb.OID20522_decode.5813_58	P01588	0.628592	0.73754	0.73754	0.50442	0.148701	0.349235	0.321195	0.927593	0.298708	0.757666	0.882642	0.630786	0.932686	EPO	cluster 4
JCHAIN	uniprot.P01591_ukb.OID20494_decode.15306_20	P01591	0.433751	0.342898	0.342898	0.0344295	0.161356	0.0342651	0.0417084	0.549694	0.0562623	0.225393	0.489116	0.74816	0.674679	JCHAIN	cluster 4
CD4	uniprot.P01730_ukb.OID20584_decode.3143_3	P01730	4.24e-05	3.11e-05	3.11e-05	3.44e-08	0.000573052	4.08e-09	3.86e-09	0.901872	0.00837777	0.920898	0.0486115	8.48e-08	0.00104746	CD4	cluster 6
HLA-DRA	uniprot.P01903_ukb.OID20520_decode.NA	P01903	0.147931	0.118279	0.118263	0.0146013	0.113585	0.0142761	0.015857	0.711881	0.243082	0.530656	0.587672	0.455013	0.975432	HLA-DRA	cluster 2
APOA1	uniprot.P02647_ukb.OID30769_decode.2750_3	P02647	0.000850413	0.000610696	0.000610696	7.22e-06	0.0243689	1.15e-05	1.58e-05	0.525331	0.0132627	0.501143	0.589994	0.0297495	0.349385	APOA1	cluster 5
APOE	uniprot.P02649_ukb.OID30727_decode.2418_55	P02649	NA	NA	NA	NA	NA	NA	NA	NA	NA	NA	NA	NA	NA	APOE	#N/A
APOA2	uniprot.P02652_ukb.OID30686_decode.7127_3	P02652	0.329332	0.278773	0.278773	0.0363001	0.108477	0.0313619	0.0306724	0.812032	0.212062	0.757666	0.638474	0.143043	0.787694	APOA2	cluster 4
APOC1	uniprot.P02654_ukb.OID30749_decode.15364_101	P02654	0.000555049	0.000439894	0.000439894	2.49e-05	0.147126	7.41e-05	0.000102879	0.752834	0.0124923	0.83044	0.0419895	1.6e-05	0.0314651	APOC1	cluster 5
FGA	uniprot.P02671_ukb.OID30788_decode.NA	P02671	0.000960106	0.000694983	0.000694983	8.18e-06	0.294274	5.87e-05	0.000185243	0.582272	0.000105079	0.469955	0.243361	1.24e-05	0.297182	FGA	cluster 2
CRP	uniprot.P02741_ukb.NA_decode.4337_49	P02741	0.0181788	0.0200523	0.0200523	0.169657	0.171545	0.679324	0.809471	0.812032	0.179954	0.971718	0.366872	2.62e-05	0.947799	CRP	cluster 3
APCS	uniprot.P02743_ukb.OID30778_decode.2474_54	P02743	4.92e-05	4.67e-05	4.68e-05	0.00043493	0.264684	0.0703972	0.149393	0.675263	1.2e-05	0.574029	0.00107366	3.72e-08	0.147809	APCS	cluster 2
C1QA	uniprot.P02745_ukb.OID20654_decode.NA	P02745	0.00306462	0.00220399	0.00220399	1.3e-06	0.0187666	9.06e-07	1.29e-06	0.592292	0.658271	0.932756	0.65545	0.603997	0.943719	C1QA	cluster 2
C9	uniprot.P02748_ukb.OID30698_decode.3060_43	P02748	0.000233555	0.000357643	0.000357643	0.0237529	0.371364	0.281793	0.439784	0.781469	0.282247	0.572645	0.882642	0.197659	0.910379	C9	cluster 3
LRG1	uniprot.P02750_ukb.OID30751_decode.NA	P02750	0.00308954	0.0028642	0.0028642	0.00352099	0.333108	0.00684279	0.00860898	0.913243	0.0753939	0.955118	0.321131	0.267876	0.942833	LRG1	cluster 2
ORM1	uniprot.P02763_ukb.OID30768_decode.NA	P02763	5.97e-06	4.11e-06	4.11e-06	3.37e-08	0.51681	1.03e-06	4.36e-06	0.555948	5.86e-06	0.683634	0.000269567	1.73e-08	0.349385	ORM1	cluster 2
AHSG	uniprot.P02765_ukb.OID30706_decode.3581_53	P02765	0.262959	0.200768	0.200768	0.0619221	0.110176	0.06484	0.0639355	0.878754	0.20765	0.832074	0.543978	0.050865	0.759835	AHSG	cluster 2
TTR	uniprot.P02766_ukb.OID30782_decode.NA	P02766	0.0542666	0.0470624	0.0470624	0.51316	0.371364	0.957282	0.973042	0.183602	0.117898	0.757666	0.76781	2.18e-05	0.55495	TTR	cluster 4
GC	uniprot.P02774_ukb.OID30780_decode.15589_1	P02774	0.0300165	0.0232139	0.0232139	0.00995841	0.216737	0.016416	0.0192074	0.322753	0.784967	0.4854	0.384151	0.085708	0.646374	GC	cluster 5
PF4	uniprot.P02776_ukb.OID30764_decode.2697_7	P02776	0.0568784	0.0554743	0.0554743	0.384311	0.301146	0.809357	0.882755	0.787942	0.152985	0.579824	0.858439	0.987663	0.975432	PF4	cluster 3
CXCL10	uniprot.P02778_ukb.OID20697_decode.4141_79	P02778	1.75e-05	1.29e-05	1.29e-05	3.77e-08	0.161531	7.53e-07	2e-06	0.917624	0.0297267	0.898972	0.285684	0.000270859	0.975432	CXCL10	cluster 2
TF	uniprot.P02787_ukb.OID30783_decode.4162_54	P02787	0.033493	0.025357	0.025357	0.00030711	0.124827	0.000749777	0.0011097	0.815515	0.863186	0.950075	0.697762	0.740374	0.0487156	TF	cluster 5
ESR1	uniprot.P03372_ukb.OID30434_decode.NA	P03372	0.733419	0.820875	0.820875	0.840271	0.515671	0.792262	0.758955	0.743665	0.7281	0.884701	0.926388	0.62169	0.915618	ESR1	cluster 4
F11	uniprot.P03951_ukb.OID30773_decode.2190_55	P03951	0.242014	0.223273	0.223273	0.341461	0.814672	0.508125	0.541927	0.777565	0.671143	0.225393	0.0581408	0.00237232	0.0115206	F11	cluster 2
KLKB1	uniprot.P03952_ukb.OID30760_decode.4152_58	P03952	0.141192	0.118019	0.118019	0.0344295	0.107367	0.0370085	0.0389364	0.897733	0.871611	0.431712	0.106507	0.113845	0.740363	KLKB1	cluster 5
MMP1	uniprot.P03956_ukb.OID20672_decode.4924_32	P03956	0.031276	0.0300486	0.0300486	0.0156727	0.682594	0.060453	0.0727384	0.680335	0.236894	0.959449	0.392316	0.147722	0.797768	MMP1	cluster 3
CAT	uniprot.P04040_ukb.OID30712_decode.3488_64	P04040	0.76877	0.76197	0.76197	0.88823	0.904006	0.992882	0.973042	0.679734	0.154153	0.536007	0.910493	0.413882	0.861194	CAT	cluster 4
ANXA1	uniprot.P04083_ukb.OID30617_decode.4960_72	P04083	0.0683214	0.0672656	0.0672656	0.00826636	0.240143	0.0160301	0.0177527	0.843598	0.0780236	0.547967	0.728332	0.00385139	0.493516	ANXA1	cluster 2
PDGFA	uniprot.P04085_ukb.OID20313_decode.4499_21	P04085	0.0170996	0.0149677	0.0149677	0.175218	0.440028	0.56745	0.650706	0.713496	0.231588	0.841172	0.68596	0.774857	0.71178	PDGFA	cluster 3
RLN2	uniprot.P04090_ukb.OID30601_decode.6621_10	P04090	3.49e-05	2.07e-05	2.07e-05	2.74e-08	0.000456656	1.4e-07	2.45e-07	0.773358	0.00352686	0.656143	0.0318274	0.000208506	0.0398222	RLN2	cluster 2
APOB	uniprot.P04114_ukb.OID30673_decode.2797_56	P04114	NA	NA	NA	NA	NA	NA	NA	NA	NA	NA	NA	NA	NA	APOB	#N/A
LCAT	uniprot.P04180_ukb.OID30677_decode.15413_3	P04180	7.94e-05	9.97e-05	9.97e-05	0.0940616	0.0968332	0.865585	0.973042	0.651694	0.00111488	0.513502	0.00148603	7.09e-07	0.585912	LCAT	cluster 3
HRG	uniprot.P04196_ukb.OID30770_decode.4996_66	P04196	0.103643	0.117178	0.117178	0.252441	0.740786	0.598017	0.644173	0.820634	0.891917	0.901546	0.843482	0.0141545	0.886727	HRG	cluster 3
A1BG	uniprot.P04217_ukb.OID30771_decode.16561_9	P04217	0.00523672	0.00900993	0.00900993	0.589343	5.19e-05	0.0474529	0.0267565	0.995291	0.00836878	0.473097	0.00615937	0.084966	0.294021	A1BG	cluster 3
SHBG	uniprot.P04278_ukb.OID30685_decode.4929_55	P04278	0.00573875	0.00390529	0.00390529	0.000215066	0.305422	0.00168294	0.00289886	0.752834	0.00154426	0.740573	0.0168452	6.1e-12	0.0398222	SHBG	cluster 5
GAPDH	uniprot.P04406_ukb.OID30600_decode.3848_14	P04406	0.0040154	0.00522715	0.00522715	0.233618	0.156321	0.865121	0.973042	0.589367	0.100401	0.683634	0.109183	0.0798994	0.889637	GAPDH	cluster 3
APOD	uniprot.P05090_ukb.OID30746_decode.4712_28	P05090	0.00823785	0.00685929	0.00685929	0.0251525	0.556298	0.145905	0.196583	0.611914	0.0102386	0.940972	0.060861	1.71e-05	0.824891	APOD	cluster 5
IL4	uniprot.P05112_ukb.OID20426_decode.2906_55	P05112	0.456291	0.412639	0.412639	0.277783	0.311465	0.287151	0.287248	0.715917	0.924256	0.843634	0.771103	0.271352	0.562548	IL4	cluster 5
IL5	uniprot.P05113_ukb.OID20472_decode.11071_1	P05113	0.91469	0.934471	0.934471	0.645441	0.597501	0.574276	0.511715	0.857613	0.852821	0.898791	0.987826	0.409138	0.697648	IL5	cluster 3
SERPINA5	uniprot.P05154_ukb.OID30763_decode.3389_7	P05154	0.009341	0.00743375	0.00743375	0.000491284	0.11425	0.00191986	0.00305047	0.0263961	0.00402869	0.833665	0.326228	7.74e-10	0.000102258	SERPINA5	cluster 2
SERPING1	uniprot.P05155_ukb.OID30777_decode.4479_14	P05155	0.489934	0.425879	0.425879	0.103167	0.145506	0.0791944	0.0677996	0.640315	0.566978	0.431712	0.318807	0.774857	0.250018	SERPING1	cluster 3
CFI	uniprot.P05156_ukb.OID30772_decode.2567_5	P05156	1.07e-05	1.05e-05	1.05e-05	0.000634503	0.0118438	0.254441	0.49346	0.630056	8.24e-05	0.538513	0.000416267	1.09e-07	0.578621	CFI	cluster 2
F13B	uniprot.P05160_ukb.OID30781_decode.5658_64	P05160	0.574993	0.508212	0.50833	0.126098	0.199928	0.136553	0.137084	0.640315	0.228009	0.810775	0.756478	0.154224	0.348922	F13B	cluster 4
ICAM1	uniprot.P05362_ukb.OID20411_decode.4342_10	P05362	0.00557037	0.0048695	0.0048695	0.00529745	0.708214	0.0142761	0.0198275	0.792413	0.117887	0.757769	0.198288	0.0153593	0.387206	ICAM1	cluster 2
JUN	uniprot.P05412_ukb.OID20424_decode.10356_21	P05412	0.0777529	0.0787415	0.0787415	0.0796226	0.137947	0.0900097	0.0910413	0.901107	0.177608	0.594839	0.232588	0.229833	0.294021	JUN	cluster 2
CLEC3B	uniprot.P05452_ukb.OID30756_decode.5701_81	P05452	0.614359	0.666724	0.666724	0.215733	0.0199308	0.0791944	0.0690444	0.612329	0.841688	0.77553	0.543714	0.00104535	0.804985	CLEC3B	cluster 4
SERPINA7	uniprot.P05543_ukb.OID30724_decode.2706_69	P05543	0.0154737	0.0153352	0.0153352	0.159351	0.229682	0.731497	0.873166	0.800809	0.0148489	0.937857	0.116626	0.74816	0.358183	SERPINA7	cluster 3
SERPIND1	uniprot.P05546_ukb.OID30767_decode.3316_58	P05546	0.00228902	0.00251673	0.00251673	0.102705	0.0282662	0.865121	0.981102	0.912277	0.000475692	0.0446406	2.4e-05	5.61e-05	0.610665	SERPIND1	cluster 3
UROD	uniprot.P06132_ukb.OID30603_decode.19289_29	P06132	0.480726	0.493183	0.493183	0.774313	0.280025	0.979105	0.981102	0.527872	0.328646	0.82518	0.150859	0.412263	0.511083	UROD	cluster 3
INSR	uniprot.P06213_ukb.OID30566_decode.3448_13	P06213	0.494217	0.459069	0.459069	0.418735	0.623982	0.447046	0.426287	0.962752	0.311482	0.876798	0.858827	0.545582	0.797768	INSR	cluster 4
FYN	uniprot.P06241_ukb.NA_decode.3813_3	P06241	0.847514	0.75741	0.757302	0.234693	0.358687	0.31539	0.295984	0.981864	0.723903	0.926409	0.998	0.733862	0.758959	FYN	cluster 4
BCHE	uniprot.P06276_ukb.OID30717_decode.15514_26	P06276	0.10762	0.0937878	0.0937878	0.612321	0.166297	0.902453	0.802977	0.777565	0.00617729	0.544068	0.0119008	0.000588451	0.824891	BCHE	cluster 3
GLA	uniprot.P06280_ukb.OID30594_decode.15588_17	P06280	1.97e-05	1.89e-05	1.89e-05	0.0387115	0.00232413	0.857723	0.973042	0.790053	0.0365976	0.932756	0.184626	4.4e-11	0.358183	GLA	cluster 2
PGR	uniprot.P06401_ukb.OID30460_decode.15693_9	P06401	0.102256	0.0869174	0.0869006	0.338966	0.665618	0.736978	0.787806	0.549694	0.534824	0.984927	0.697762	0.224686	0.727583	PGR	cluster 3
APOA4	uniprot.P06727_ukb.OID30733_decode.17685_9	P06727	0.376643	0.58026	0.58026	1.03e-05	1.66e-12	7.72e-09	1.75e-09	0.792413	0.466499	0.575373	0.668741	0.647433	4.12e-05	APOA4	cluster 4
EIF4E	uniprot.P06730_ukb.OID30557_decode.19263_147	P06730	0.293147	0.309439	0.309439	0.478863	0.0163999	0.134701	0.116395	0.798906	0.595324	0.890278	0.543978	0.499033	0.611434	EIF4E	cluster 3
GPI	uniprot.P06744_ukb.OID30680_decode.4272_46	P06744	0.113451	0.129502	0.129502	0.79652	0.0154186	0.312191	0.27582	0.524545	0.454251	0.536007	0.197569	0.0685997	0.939285	GPI	cluster 3
FABP1	uniprot.P07148_ukb.OID20778_decode.11516_7	P07148	1.98e-06	1.19e-06	1.19e-06	6.98e-16	4.16e-14	1.17e-22	1.17e-23	0.128253	1.09e-07	0.526676	2.4e-05	5.74e-21	1.01e-05	FABP1	cluster 6
PROS1	uniprot.P07225_ukb.OID30737_decode.2700_56	P07225	0.164477	0.172022	0.172022	0.473354	0.814672	0.758159	0.783734	0.928909	0.104838	0.453455	0.0281305	1.86e-07	0.467575	PROS1	cluster 3
ASGR2	uniprot.P07307_ukb.OID30679_decode.9474_22	P07307	0.0229036	0.0205251	0.0205251	0.007544	0.0185213	0.00639789	0.00651624	0.378664	0.0291077	0.554865	0.252628	0.0664953	0.398098	ASGR2	cluster 6
ACYP1	uniprot.P07311_ukb.OID30642_decode.NA	P07311	0.00385523	0.00306906	0.00306906	0.0294226	0.507584	0.229596	0.288929	0.981864	0.299047	0.986319	0.599051	0.134719	0.892387	ACYP1	cluster 3
CSF1R	uniprot.P07333_ukb.OID30681_decode.13682_47	P07333	0.00109563	0.000761466	0.000761466	0.000528962	0.320887	0.00245708	0.00407749	0.675263	0.57761	0.431712	0.394124	0.106485	0.892775	CSF1R	cluster 2
C8B	uniprot.P07358_ukb.OID30719_decode.NA	P07358	0.15271	0.164736	0.164736	0.600901	0.294731	0.938927	0.871675	0.807023	0.730534	0.872841	0.987826	0.00166303	0.312559	C8B	cluster 3
RNASE1	uniprot.P07998_ukb.OID30672_decode.7211_2	P07998	0.00431467	0.00405784	0.00405784	0.00106945	0.000578375	0.000686079	0.000648017	0.0306424	0.00381052	0.526676	0.0439576	0.00125272	0.00309876	RNASE1	cluster 1
SERPINA6	uniprot.P08185_ukb.OID30743_decode.4785_30	P08185	0.00110979	0.000718336	0.000718336	5.79e-08	0.00068884	6.28e-08	1.16e-07	0.381605	0.0281836	0.946993	0.11662	0.208053	0.358183	SERPINA6	cluster 5
MMP2	uniprot.P08253_ukb.NA_decode.4160_49	P08253	1.01e-06	7.5e-07	7.5e-07	9.17e-09	0.789342	8.59e-06	4.86e-05	0.68368	0.004657	0.842753	0.0581408	2.86e-10	0.189098	MMP2	cluster 5
SOD3	uniprot.P08294_ukb.OID30683_decode.5660_51	P08294	1.69e-05	2.36e-05	2.36e-05	0.0942536	8.92e-05	0.918327	0.746642	0.792413	0.141452	0.122816	0.00187295	0.000638783	0.98696	SOD3	cluster 5
LPA	uniprot.P08519_ukb.OID30747_decode.NA	P08519	0.456291	0.549256	0.549256	0.790339	0.290019	0.704154	0.661909	0.875268	0.961618	0.839819	0.456412	0.039398	0.76847	LPA	cluster 4
CFH	uniprot.P08603_ukb.OID30790_decode.4159_130	P08603	1.68e-06	1.71e-06	1.71e-06	0.000199038	0.00468363	0.0746859	0.175853	0.183602	4.59e-07	0.932756	0.000149444	3.61e-06	0.932686	CFH	cluster 2
SERPINF2	uniprot.P08697_ukb.OID30779_decode.3024_18	P08697	0.00673183	0.0055449	0.0055449	8.72e-06	0.0334541	3.14e-05	5.2e-05	0.454611	0.765227	0.234301	0.0619776	0.0709615	0.939285	SERPINF2	cluster 5
KRT19	uniprot.P08727_ukb.OID20596_decode.15606_19	P08727	0.00158209	0.00117918	0.00117918	6.5e-06	0.00289431	4.2e-06	5.19e-06	0.679991	0.70318	0.39641	0.0737545	0.0125502	0.000552462	KRT19	cluster 2
FGF2	uniprot.P09038_ukb.OID20503_decode.3025_50	P09038	0.571298	0.578446	0.578446	0.659826	0.9998	0.819614	0.802977	0.641823	0.435878	0.827791	0.394207	0.288254	0.98696	FGF2	cluster 3
DBH	uniprot.P09172_ukb.OID30703_decode.NA	P09172	NA	NA	NA	NA	NA	NA	NA	NA	NA	NA	NA	NA	NA	DBH	#N/A
MMP7	uniprot.P09237_ukb.OID20087_decode.2789_26	P09237	0.0136612	0.00627561	0.00627561	0.0227292	0.853194	0.135966	0.152719	0.396489	0.00153855	0.986319	0.116626	0.00172978	0.801835	MMP7	cluster 3
MMP10	uniprot.P09238_ukb.OID20687_decode.8479_4	P09238	0.649003	0.515255	0.515255	0.00792311	0.00800736	0.00661965	0.00639903	0.777565	0.258172	0.934108	0.456412	0.545582	0.98696	MMP10	cluster 4
CD48	uniprot.P09326_ukb.OID20692_decode.3292_75	P09326	0.00298688	0.00164074	0.00164074	5.27e-11	1.16e-09	6.54e-16	2.09e-16	0.966967	0.168916	0.777775	0.688554	0.232787	0.294021	CD48	cluster 2
CXCL1	uniprot.P09341_ukb.OID20762_decode.2985_35	P09341	0.119059	0.115131	0.115131	0.0836248	0.737362	0.0844523	0.0944365	0.828129	0.34813	0.986319	0.697762	0.240172	0.714091	CXCL1	cluster 3
CD7	uniprot.P09564_ukb.OID30543_decode.12008_3	P09564	1.59e-05	9.61e-06	9.61e-06	7.64e-12	2.51e-05	3.88e-12	6.14e-12	0.483064	0.0253155	0.841172	0.0777275	0.00546242	0.0120651	CD7	cluster 6
CSF1	uniprot.P09603_ukb.OID20719_decode.3738_54	P09603	1.68e-06	7.5e-07	7.5e-07	2.61e-14	1.3e-12	3.5e-18	1.73e-18	0.015727	7.1e-10	0.556649	0.00779495	0.0671426	0.314516	CSF1	cluster 6
CD3G	uniprot.P09693_ukb.OID30448_decode.7924_7	P09693	0.772337	0.763864	0.763864	0.478863	0.522517	0.512617	0.521289	0.981864	0.864585	0.694944	0.658019	0.715452	0.547423	CD3G	cluster 4
FGR	uniprot.P09769_ukb.OID20828_decode.3810_50	P09769	0.00229741	0.00180196	0.00180196	0.00140719	0.640785	0.0181831	0.0304517	0.776016	0.0481514	0.761526	0.10071	0.00358668	0.326218	FGR	cluster 2
C1S	uniprot.P09871_ukb.OID30731_decode.8840_61	P09871	0.188862	0.188767	0.188767	0.215733	0.469137	0.246234	0.252251	0.578611	0.252955	0.956072	0.304347	0.212656	0.43748	C1S	cluster 6
CSF3	uniprot.P09919_ukb.OID20491_decode.4840_73	P09919	0.168886	0.147888	0.147888	0.0452995	0.17794	0.0590197	0.0580112	0.733307	0.0887252	0.605021	0.681212	0.0270286	0.358183	CSF3	cluster 2
ALPI	uniprot.P09923_ukb.OID30497_decode.17441_4	P09923	0.870376	0.888861	0.888861	0.809541	0.735373	0.826444	0.790035	0.848579	0.880201	0.839819	0.746129	0.630786	0.875082	ALPI	cluster 2
C1QTNF9	uniprot.P0C862_ukb.OID30620_decode.16605_2	P0C862	1.14e-06	1.59e-06	1.59e-06	0.00495362	0.0674846	0.336072	0.496459	0.777565	0.787486	0.431712	0.110912	0.143564	0.645752	C1QTNF9	cluster 5
PGA4	uniprot.P0DJD7_ukb.OID30699_decode.NA	P0DJD7	0.614359	0.474487	0.474487	0.00043097	4.21e-05	2.71e-05	1.61e-05	0.843797	0.9869	0.843634	0.797139	0.987663	0.0282185	PGA4	cluster 4
CSH1	uniprot.P0DML2_ukb.OID30667_decode.NA	P0DML2	NA	NA	NA	NA	NA	NA	NA	NA	NA	NA	NA	NA	NA	CSH1	#N/A
HSPA1A	uniprot.P0DMV8_ukb.OID20718_decode.4124_24	P0DMV8	0.0012224	0.00106625	0.00106625	0.0693459	0.301054	0.508125	0.611417	0.781469	0.00492645	0.469955	0.0138247	0.00588991	0.759835	HSPA1A	cluster 3
CGB3_CGB5_CGB8	uniprot.P0DN86_ukb.OID30671_decode.NA	P0DN86	0.774561	0.66338	0.66338	0.612321	0.640785	0.666266	0.673109	0.797401	0.92553	0.959449	0.975672	0.722767	0.943719	CGB3_CGB5_CGB8	cluster 4
IGLC2	uniprot.P0DOY2_ukb.OID30740_decode.NA	P0DOY2	1.01e-06	5.51e-07	5.51e-07	1.63e-12	5.49e-06	4.86e-14	7.41e-14	0.276444	1.2e-05	0.68145	0.0667203	2.32e-07	0.000631627	IGLC2	cluster 6
AMY1A_AMY1B_AMY1C	uniprot.P0DUB6_P0DTE7_P0DTE8_ukb.OID30707_decode.NA	P0DUB6_P0DTE7_P0DTE8	0.0201853	0.0230205	0.0230205	0.198319	0.0796994	0.985315	0.884755	0.612329	0.0117854	0.547967	0.0646296	0.00472199	0.909162	AMY1A_AMY1B_AMY1C	cluster 4
GLI2	uniprot.P10070_ukb.OID30429_decode.NA	P10070	0.173105	0.19507	0.19507	0.612321	0.457402	0.999	0.915758	0.777565	0.979204	0.944187	0.926388	0.315599	0.98696	GLI2	cluster 4
GZMB	uniprot.P10144_ukb.OID20604_decode.4133_54	P10144	0.936779	0.970397	0.970397	0.538296	0.597501	0.583384	0.571519	0.928909	0.693717	0.619418	0.405452	0.840999	0.626869	GZMB	cluster 3
TXN	uniprot.P10599_ukb.OID30670_decode.8813_160	P10599	0.0463422	0.0511942	0.0511942	0.621154	0.209422	0.900981	0.846904	0.807734	0.217854	0.688225	0.886503	0.612749	0.467908	TXN	cluster 3
C7	uniprot.P10643_ukb.OID30766_decode.2888_49	P10643	0.320847	0.330978	0.330978	0.393885	0.447363	0.446972	0.447542	0.934953	0.342626	0.547967	0.135912	0.447897	0.686032	C7	cluster 5
FGF6	uniprot.P10767_ukb.OID30443_decode.4130_71	P10767	0.838456	0.934471	0.934471	0.851629	0.833419	0.878233	0.859044	0.737779	0.631267	0.920898	0.939843	0.715452	0.975432	FGF6	cluster 4
CLU	uniprot.P10909_ukb.OID30732_decode.4542_24	P10909	0.0232101	0.0165277	0.0165277	0.00352099	0.32217	0.013849	0.0226769	0.609565	0.179954	0.937857	0.331022	0.690185	0.773044	CLU	cluster 4
GHR	uniprot.P10912_ukb.OID30574_decode.2948_58	P10912	0.00219158	0.00180604	0.00180604	0.00816023	0.287169	0.127598	0.192589	0.720314	0.000189374	0.434892	0.00107513	0.000956247	0.442587	GHR	cluster 2
CD8B	uniprot.P10966_ukb.NA_decode.9310_2	P10966	0.40887	0.410323	0.410323	0.438255	0.634016	0.518712	0.536332	0.792413	0.978708	0.754838	0.636947	0.605679	0.702198	CD8B	cluster 4
MBL2	uniprot.P11226_ukb.OID30759_decode.3000_66	P11226	0.830545	0.823719	0.823719	0.363903	0.553071	0.39099	0.401906	0.630056	0.638471	0.473709	0.0801931	0.00275782	0.664137	MBL2	cluster 4
RALB	uniprot.P11234_ukb.OID30567_decode.18432_32	P11234	0.853365	0.890004	0.890004	0.355069	0.481142	0.445028	0.381927	0.978276	0.982703	0.843634	0.961505	0.676671	0.714212	RALB	cluster 3
BCR	uniprot.P11274_ukb.OID20558_decode.NA	P11274	0.023991	0.0206848	0.0206848	0.36095	0.32153	0.848531	0.915758	0.780717	0.0430241	0.531026	0.0591998	0.0522666	0.949182	BCR	cluster 3
FGF3	uniprot.P11487_ukb.OID30544_decode.7894_155	P11487	0.584445	0.578446	0.578446	0.553453	0.575345	0.603564	0.61484	0.824371	0.926949	0.986319	0.958322	0.545582	0.895199	FGF3	cluster 5
SCGB1A1	uniprot.P11684_ukb.OID20688_decode.NA	P11684	0.0490979	0.0208301	0.0208301	6.06e-08	8.88e-09	1.12e-09	9.73e-10	0.596716	0.736537	0.431712	0.264688	0.413986	0.250018	SCGB1A1	cluster 4
FGF5	uniprot.P12034_ukb.OID20490_decode.3065_65	P12034	0.373796	0.395511	0.395511	0.258358	0.0180069	0.0791944	0.0580112	0.612329	0.240769	0.591448	0.987826	0.227136	0.773044	FGF5	cluster 4
CKMT1A_CKMT1B	uniprot.P12532_ukb.OID20721_decode.15542_19	P12532	0.0318994	0.030738	0.030738	0.731255	0.20505	0.879458	0.818196	0.183602	0.02183	0.772531	0.0474501	0.882374	0.585912	CKMT1A_CKMT1B	cluster 4
GZMA	uniprot.P12544_ukb.OID20663_decode.3440_7	P12544	0.0196532	0.0152768	0.0152768	0.000173977	0.000454707	3.19e-05	2.53e-05	0.627252	0.00667001	0.70683	0.0249358	7.36e-07	0.895199	GZMA	cluster 2
ACE	uniprot.P12821_ukb.OID30696_decode.10714_7	P12821	0.484802	0.508766	0.508766	0.777791	0.368778	0.928702	0.870845	0.91401	0.702122	0.574029	0.457794	0.816648	0.914032	ACE	cluster 4
MLN	uniprot.P12872_ukb.OID20541_decode.5631_83	P12872	0.0367147	0.0257521	0.0257521	4.09e-05	0.00101323	2.43e-05	2.31e-05	0.482761	0.1847	0.523944	0.0571793	7.25e-11	0.0408802	MLN	cluster 4
PEPD	uniprot.P12955_ukb.OID30688_decode.NA	P12955	0.617305	0.648558	0.648558	0.473334	0.668496	0.513214	0.492104	0.697321	0.14364	0.70683	0.633612	0.404363	0.116174	PEPD	cluster 4
IL7	uniprot.P13232_ukb.OID20535_decode.4140_3	P13232	0.587189	0.627884	0.627884	0.19367	0.0362093	0.0864832	0.0715784	0.934953	0.406026	0.70683	0.290056	0.912199	0.367809	IL7	cluster 3
CCL4	uniprot.P13236_ukb.OID20695_decode.NA	P13236	0.17092	0.163867	0.163867	0.109656	0.751449	0.0814746	0.0738569	0.450281	0.341873	0.934108	0.543978	0.000653244	0.0124817	CCL4	cluster 2
CCL5	uniprot.P13501_ukb.OID20412_decode.5480_49	P13501	0.0501876	0.05663	0.05663	0.67154	0.0615788	0.776689	0.652307	0.812032	0.393363	0.87533	0.446459	0.424455	0.801835	CCL5	cluster 3
TPT1	uniprot.P13693_ukb.OID20476_decode.3872_2	P13693	0.774561	0.797244	0.797244	0.619793	0.937229	0.829546	0.790035	0.59866	0.240979	0.70683	0.189079	0.340905	0.975432	TPT1	cluster 4
HLA-E	uniprot.P13747_ukb.OID20532_decode.NA	P13747	0.00109563	0.00113343	0.00113343	0.00295005	0.022872	0.00464144	0.00502483	0.430669	0.11039	0.971718	0.0643564	0.0176636	0.0228831	HLA-E	cluster 6
CTSE	uniprot.P14091_ukb.OID30628_decode.15376_134	P14091	0.797059	0.812189	0.812189	0.531313	0.171602	0.320881	0.279132	0.592292	0.308938	0.750944	0.975672	0.472414	0.263121	CTSE	cluster 4
SELL	uniprot.P14151_ukb.OID30752_decode.4831_4	P14151	0.255459	0.236152	0.236152	0.227031	0.515671	0.250256	0.268324	0.633929	0.977508	0.66338	0.462642	0.28025	0.586525	SELL	cluster 4
MIF	uniprot.P14174_ukb.OID21073_decode.8221_19	P14174	0.00137653	0.00131938	0.00131938	0.0988021	0.216737	0.583384	0.678063	0.549694	0.439424	0.68145	0.287376	0.0600873	0.914032	MIF	cluster 3
HGF	uniprot.P14210_ukb.OID20656_decode.2681_23	P14210	8.82e-07	5.31e-07	5.31e-07	2.76e-09	0.990748	3.74e-07	1.92e-06	0.429772	7.1e-10	0.927167	5.67e-05	7.88e-12	0.831847	HGF	cluster 2
HCLS1	uniprot.P14317_ukb.OID20648_decode.NA	P14317	0.0003845	0.000509826	0.000509826	0.304427	0.00261542	0.928702	0.802977	0.831757	0.118152	0.469955	0.0693611	0.309148	0.892387	HCLS1	cluster 3
MMP9	uniprot.P14780_ukb.OID21103_decode.2579_17	P14780	0.00174932	0.00157247	0.00157247	0.000991455	0.99897	0.00528986	0.0107927	0.5139	0.000262872	0.571458	0.0026458	2.18e-05	0.301814	MMP9	cluster 2
IL2RB	uniprot.P14784_ukb.OID20450_decode.9343_16	P14784	0.018656	0.010291	0.010291	2.78e-07	6.8e-05	7.01e-09	3.56e-09	0.562929	0.941626	0.536007	0.411869	0.735954	0.547423	IL2RB	cluster 2
LIF	uniprot.P15018_ukb.OID20824_decode.7790_21	P15018	0.180895	0.164736	0.164736	0.870573	0.306963	0.831233	0.767134	0.640315	0.0928022	0.920524	0.250536	0.323161	0.992132	LIF	cluster 2
IL9	uniprot.P15248_ukb.OID31298_decode.5834_18	P15248	0.772337	0.909406	0.909406	0.142118	0.100684	0.110374	0.113018	0.792413	0.608886	0.876798	0.886503	0.734644	0.697648	IL9	cluster 4
IFNGR1	uniprot.P15260_ukb.OID20678_decode.5825_49	P15260	0.278344	0.121648	0.121648	3.52e-11	2.76e-21	8.24e-17	1.49e-17	0.358862	0.0252433	0.225393	0.474574	0.0603198	0.0124817	IFNGR1	cluster 2
B4GALT1	uniprot.P15291_ukb.OID20780_decode.13381_49	P15291	0.0552066	0.0282948	0.0282948	3.37e-05	1.05e-05	6.4e-06	6.37e-06	0.128253	0.0426123	0.350156	0.651282	0.987663	0.0173109	B4GALT1	cluster 2
NME1	uniprot.P15531_ukb.OID30451_decode.5909_51	P15531	0.0558994	0.0559484	0.0559484	0.112288	0.920405	0.220706	0.271606	0.663238	0.619557	0.645309	0.342459	0.36634	0.611434	NME1	cluster 5
RPA2	uniprot.P15927_ukb.OID30453_decode.19264_6	P15927	0.105494	0.109247	0.109247	0.764216	0.17794	0.728732	0.70493	0.752834	0.990524	0.840845	0.711167	0.104151	0.914032	RPA2	cluster 3
PNLIP	uniprot.P16233_ukb.OID30693_decode.15613_16	P16233	0.00431467	0.00606603	0.00606603	0.528851	0.00341178	0.625618	0.492104	0.991856	0.586393	0.531026	0.216545	0.353211	0.772429	PNLIP	cluster 4
EPCAM	uniprot.P16422_ukb.OID20743_decode.NA	P16422	0.0490979	0.0391847	0.0391847	0.0287859	0.50372	0.0702715	0.0949212	0.651694	0.638471	0.547967	0.590348	0.566906	0.693106	EPCAM	cluster 3
ABO	uniprot.P16442_ukb.OID30675_decode.9253_52	P16442	NA	NA	NA	NA	NA	NA	NA	NA	NA	NA	NA	NA	NA	ABO	#N/A
MGMT	uniprot.P16455_ukb.OID20588_decode.NA	P16455	0.0258542	0.025521	0.025521	0.466348	0.239398	0.966035	0.973042	0.74681	0.218311	0.469955	0.0737906	0.303675	0.975432	MGMT	cluster 3
CD36	uniprot.P16671_ukb.OID30485_decode.2973_15	P16671	0.0432863	0.031694	0.031694	0.0121323	0.385683	0.0354715	0.0444824	0.957369	0.0225961	0.840073	0.0321723	0.0081221	0.783322	CD36	cluster 3
NAGA	uniprot.P17050_ukb.OID30509_decode.NA	P17050	0.421127	0.357076	0.357076	0.969994	0.587518	0.849794	0.846904	0.429772	0.453737	0.619418	0.197569	0.0160879	0.434305	NAGA	cluster 3
HSPA6	uniprot.P17066_ukb.NA_decode.13672_3	P17066	0.124501	0.128987	0.128987	0.162687	0.470465	0.326139	0.400904	0.932878	0.58768	0.70683	0.456412	0.401625	0.657463	HSPA6	cluster 4
ITGA2	uniprot.P17301_ukb.OID30570_decode.15603_20	P17301	0.0168963	0.0157458	0.0157458	0.00913369	0.305786	0.0629813	0.107844	0.773358	0.539699	0.951913	0.572909	0.147722	0.922086	ITGA2	cluster 5
TYRP1	uniprot.P17643_ukb.OID30517_decode.NA	P17643	0.208473	0.198637	0.198637	0.284583	0.79566	0.438497	0.444793	0.846703	0.468421	0.361016	0.240026	0.556739	0.245065	TYRP1	cluster 3
CR1	uniprot.P17927_ukb.OID30697_decode.19556_12	P17927	0.00419445	0.00349112	0.00349112	9.03e-05	0.0166623	6.46e-05	6.46e-05	0.949269	0.417504	0.630133	0.831639	0.0311529	0.661654	CR1	cluster 2
IL1RN	uniprot.P18510_ukb.OID20700_decode.5353_89	P18510	0.00897205	0.00907639	0.00907639	0.0107049	0.153235	0.0142683	0.014819	0.5663	0.0230287	0.890278	0.0180938	0.0135043	0.0508879	IL1RN	cluster 2
ITGB6	uniprot.P18564_ukb.OID20493_decode.7737_76	P18564	0.0350044	0.0318324	0.0318324	0.0351036	0.230297	0.865585	0.984703	0.596716	0.385831	0.469955	0.333781	0.452747	0.760427	ITGB6	cluster 5
CD58	uniprot.P19256_ukb.OID20716_decode.10938_13	P19256	0.0293288	0.0659082	0.0659082	2.7e-05	4.27e-16	2.72e-10	3e-11	0.605366	0.452516	0.0438984	0.0721812	0.163537	0.946632	CD58	cluster 4
VCAM1	uniprot.P19320_ukb.OID20396_decode.2967_8	P19320	2.51e-06	1.71e-06	1.71e-06	6.85e-13	0.000923178	4.57e-14	1.13e-13	0.611474	0.307489	0.572824	0.765869	0.0147746	0.754842	VCAM1	cluster 2
TRIM21	uniprot.P19474_ukb.OID20533_decode.NA	P19474	0.0117215	0.0128673	0.0128673	0.338966	0.151715	0.979664	0.970592	0.777565	0.398206	0.577399	0.240026	0.0290929	0.945247	TRIM21	cluster 3
AOC1	uniprot.P19801_ukb.OID20452_decode.15486_126	P19801	0.817354	0.806871	0.806871	0.59861	0.605959	0.665665	0.650706	0.807023	0.608051	0.70683	0.99493	0.567269	0.975432	AOC1	cluster 4
ITIH1	uniprot.P19827_ukb.OID30722_decode.7955_195	P19827	0.393106	0.394857	0.394857	0.498682	0.640785	0.573862	0.587492	0.675263	0.7281	0.967918	0.874044	0.566906	0.975432	ITIH1	cluster 5
CXCL3	uniprot.P19876_ukb.OID20788_decode.NA	P19876	0.0235149	0.0207723	0.0207723	0.638933	0.0513808	0.761296	0.678063	0.446792	0.279341	0.431712	0.0707769	0.112693	0.667229	CXCL3	cluster 3
NCF2	uniprot.P19878_ukb.OID20567_decode.10047_12	P19878	0.496669	0.49435	0.49435	0.546428	0.615349	0.609914	0.644173	0.611914	0.469192	0.90227	0.480488	0.334076	0.783124	NCF2	cluster 3
FST	uniprot.P19883_ukb.OID20770_decode.4132_27	P19883	0.000960106	0.000867037	0.000867037	0.0124775	0.65108	0.139321	0.199049	0.679734	0.166902	0.469955	0.0355446	0.0138873	0.137384	FST	cluster 2
TCN1	uniprot.P20061_ukb.OID30687_decode.19614_8	P20061	0.114529	0.105121	0.105121	0.294527	0.864855	0.568018	0.632997	0.833009	0.109985	0.66338	0.795778	0.174988	0.358183	TCN1	cluster 3
SPINK2	uniprot.P20155_ukb.OID30627_decode.13405_61	P20155	0.00597461	0.00514379	0.00514379	0.00275818	0.00750646	0.00279359	0.00284986	0.880087	0.13096	0.710122	0.446459	0.110197	0.0487156	SPINK2	cluster 6
CD22	uniprot.P20273_ukb.OID20637_decode.NA	P20273	0.00109563	0.00085434	0.00085434	7.29e-06	0.280292	2.77e-05	5.09e-05	0.960111	2.01e-05	0.544068	0.194184	0.00263814	0.558988	CD22	cluster 2
RAB6A	uniprot.P20340_ukb.OID20608_decode.NA	P20340	4.24e-05	3.68e-05	3.68e-05	1.02e-05	0.135818	9.18e-05	0.000164296	0.55342	0.00560907	0.920898	0.0818246	0.150174	0.772429	RAB6A	cluster 5
ITGAL	uniprot.P20701_ukb.OID30537_decode.11617_1	P20701	5.74e-05	5.52e-05	5.52e-05	0.000416111	0.66331	0.0242727	0.0401648	0.780717	0.0253137	0.34344	0.00591847	0.000850113	0.673909	ITGAL	cluster 2
PZP	uniprot.P20742_ukb.OID30730_decode.6580_29	P20742	0.0237751	0.0208301	0.0208301	0.0246893	0.559359	0.0428668	0.0535032	0.549694	0.0418422	0.839852	0.222701	0.043163	0.909162	PZP	cluster 2
NTF3	uniprot.P20783_ukb.OID20591_decode.4145_58	P20783	9.62e-08	6.54e-08	6.54e-08	1.46e-05	0.366777	0.0169472	0.0422165	0.711881	0.864012	0.832802	0.636555	0.0344527	0.596392	NTF3	cluster 5
IL11	uniprot.P20809_ukb.OID20455_decode.4493_92	P20809	0.125778	0.139657	0.139657	0.352057	0.910694	0.560222	0.587354	0.996332	0.295919	0.572645	0.867283	0.941185	0.873316	IL11	cluster 4
COL5A1	uniprot.P20908_ukb.OID30587_decode.NA	P20908	0.00926184	0.00654794	0.00654794	0.0119748	0.689195	0.0607119	0.0722116	0.918187	0.104022	0.601071	0.874966	0.00799331	0.688503	COL5A1	cluster 3
KITLG	uniprot.P21583_ukb.NA_decode.9377_25	P21583	3.87e-06	4.82e-06	4.82e-06	0.315895	4.85e-05	0.49534	0.316324	0.536337	0.378266	0.350156	0.280275	0.000793719	0.0958559	KITLG	cluster 5
EPHA1	uniprot.P21709_ukb.OID20677_decode.3431_54	P21709	1.03e-07	6.54e-08	6.54e-08	2.33e-16	4.34e-13	3.88e-21	1.69e-21	0.00285658	6.15e-07	0.70683	0.0224705	8.2e-08	4.12e-05	EPHA1	cluster 6
CD72	uniprot.P21854_ukb.OID30641_decode.7009_8	P21854	7.84e-06	5.14e-06	5.14e-06	2.73e-12	7.61e-07	8.8e-16	5.79e-16	0.592292	5.78e-05	0.531026	0.172078	9.97e-05	0.0197153	CD72	cluster 6
ERBB3	uniprot.P21860_ukb.OID20705_decode.2617_56	P21860	0.00703541	0.00448426	0.00448426	1.53e-08	0.00662758	2.65e-07	3.95e-07	0.00379642	0.208115	0.0438984	0.0883158	0.529585	0.387206	ERBB3	cluster 5
IL10	uniprot.P22301_ukb.OID20431_decode.2773_50	P22301	0.214188	0.206869	0.206869	0.242866	0.952992	0.406913	0.44021	0.843797	0.0710787	0.431712	0.0180442	0.319496	0.946632	IL10	cluster 2
ACHE	uniprot.P22303_ukb.OID30585_decode.15553_22	P22303	8.85e-05	8.96e-05	8.96e-05	0.000681413	0.531239	0.022159	0.0330785	0.829159	0.560182	0.0446406	0.0165334	0.055157	0.230301	ACHE	cluster 5
IDS	uniprot.P22304_ukb.OID20619_decode.3198_4	P22304	0.000618678	0.000553071	0.000553071	1.64e-05	0.693266	0.000127316	0.000309738	0.697321	0.271619	0.579824	0.201027	6.51e-05	0.00256291	IDS	cluster 5
FGFR4	uniprot.P22455_ukb.OID30646_decode.4988_49	P22455	0.101983	0.139706	0.139706	0.306953	0.00838226	0.071041	0.0530344	0.881057	0.566978	0.4854	0.4942	0.472414	0.53131	FGFR4	cluster 4
GAL	uniprot.P22466_ukb.OID20727_decode.15390_3	P22466	0.274258	0.263863	0.263863	0.084334	0.39868	0.101545	0.110274	0.87529	0.612345	0.473097	0.376076	0.395023	0.767898	GAL	cluster 3
MMP8	uniprot.P22894_ukb.OID21019_decode.9172_69	P22894	0.00477216	0.00451403	0.00451403	0.000921361	0.627486	0.00368761	0.00826909	0.317033	0.000475692	0.601071	0.00882949	0.0155543	0.440331	MMP8	cluster 2
MRC1	uniprot.P22897_ukb.OID30694_decode.2637_77	P22897	6.63e-05	6.69e-05	6.69e-05	0.000307574	0.641633	0.0140285	0.0249156	0.752834	0.00617729	0.740079	0.0110822	1.6e-07	0.794207	MRC1	cluster 2
ITGA6	uniprot.P23229_ukb.OID20528_decode.NA	P23229	0.778068	0.688822	0.688822	0.925185	0.984821	0.992882	0.973042	0.857613	0.438159	0.811353	0.370046	0.965878	0.405078	ITGA6	cluster 3
NPPC	uniprot.P23582_ukb.OID20568_decode.NA	P23582	3.34e-06	1.21e-06	1.21e-06	2.48e-18	4.83e-34	3.1e-28	2.54e-30	0.393687	6.82e-09	0.740079	0.00537617	2.51e-12	3.11e-08	NPPC	cluster 6
DGKA	uniprot.P23743_ukb.OID30546_decode.NA	P23743	0.00702782	0.00805134	0.00805134	0.187004	0.31009	0.679951	0.767134	0.833009	0.0665918	0.571458	0.0721812	0.00848176	0.772429	DGKA	cluster 3
IL32	uniprot.P24001_ukb.OID20605_decode.9051_13	P24001	0.180525	0.23216	0.23216	0.173775	0.00239294	0.0241077	0.0147056	0.559431	0.150219	0.431712	0.0114878	0.582094	0.595678	IL32	cluster 4
FCAR	uniprot.P24071_ukb.OID20564_decode.4987_17	P24071	0.0185735	0.0185514	0.0185514	0.036405	0.600778	0.124659	0.167717	0.857613	0.0851829	0.955118	0.176842	0.0502294	0.6979	FCAR	cluster 2
CRHBP	uniprot.P24387_ukb.OID20747_decode.6039_24	P24387	0.000176387	0.000125016	0.000125016	2.57e-07	3.19e-05	3.43e-08	3.63e-08	0.128253	0.000146723	0.805184	0.0034011	1.19e-05	0.0373719	CRHBP	cluster 2
IL4R	uniprot.P24394_ukb.OID20576_decode.3055_54	P24394	0.0131834	0.00678581	0.00678581	4.56e-07	2.77e-06	1.5e-08	1.02e-08	0.996332	0.0644002	0.431712	0.624031	0.0242646	0.284062	IL4R	cluster 2
EDNRB	uniprot.P24530_ukb.OID30421_decode.NA	P24530	NA	NA	NA	NA	NA	NA	NA	NA	NA	NA	NA	NA	NA	EDNRB	#N/A
ACP1	uniprot.P24666_ukb.OID30524_decode.3858_5	P24666	0.417424	0.412639	0.412639	0.534356	0.952992	0.720909	0.709149	0.936482	0.311482	0.971718	0.461823	0.515325	0.629714	ACP1	cluster 3
CCNE1	uniprot.P24864_ukb.OID30456_decode.NA	P24864	0.581577	0.562012	0.562012	0.569212	0.911391	0.728732	0.75587	0.630056	0.798288	0.460865	0.289297	0.376656	0.975432	CCNE1	cluster 3
POLR2A	uniprot.P24928_ukb.OID30440_decode.NA	P24928	NA	NA	NA	NA	NA	NA	NA	NA	NA	NA	NA	NA	NA	POLR2A	#N/A
F2R	uniprot.P25116_ukb.OID20691_decode.NA	P25116	0.0005094	0.000332626	0.000332681	0.000185987	0.61336	0.00454187	0.00717168	0.981864	0.0514293	0.39641	0.015554	0.0290929	0.250629	F2R	cluster 2
YY1	uniprot.P25490_ukb.OID30446_decode.17337_1	P25490	NA	NA	NA	NA	NA	NA	NA	NA	NA	NA	NA	NA	NA	YY1	#N/A
DNAJB2	uniprot.P25686_ukb.OID30661_decode.11438_6	P25686	0.0185443	0.0207945	0.0207945	0.0948644	0.715819	0.392341	0.441086	0.640315	0.45414	0.951913	0.720033	0.0881417	0.783322	DNAJB2	cluster 3
CD40	uniprot.P25942_ukb.OID20724_decode.NA	P25942	0.000482483	0.000332626	0.000332681	5.29e-05	0.368778	0.000590211	0.000937256	0.809	0.0426123	0.469955	0.0284276	0.0100623	0.290262	CD40	cluster 2
PTX3	uniprot.P26022_ukb.OID20570_decode.6447_73	P26022	0.00444791	0.00370159	0.00370159	0.000118525	0.251329	0.000939045	0.00146208	0.612329	0.373846	0.869837	0.910493	0.193917	0.700166	PTX3	cluster 2
MST1	uniprot.P26927_ukb.OID30713_decode.4407_10	P26927	0.287069	0.280303	0.280303	0.731255	0.546522	0.681201	0.673109	0.609565	0.345053	0.811353	0.341087	0.617307	0.670008	MST1	cluster 3
IL3RA	uniprot.P26951_ukb.OID20461_decode.13744_37	P26951	0.907901	0.751958	0.751958	0.00512768	0.000280325	0.000483347	0.000387014	0.928909	0.616065	0.434892	0.300486	0.57113	0.943719	IL3RA	cluster 4
PON1	uniprot.P27169_ukb.OID30704_decode.4261_55	P27169	0.0292105	0.030738	0.030738	0.0267311	0.0990486	0.0370085	0.0375701	0.381605	0.164721	0.469955	0.837664	0.306733	0.744891	PON1	cluster 5
YWHAQ	uniprot.P27348_ukb.OID30605_decode.7625_27	P27348	0.134331	0.143243	0.143243	0.739401	0.182651	0.8472	0.802977	0.549694	0.828649	0.785151	0.636555	0.212656	0.781357	YWHAQ	cluster 3
ARNT	uniprot.P27540_ukb.OID20432_decode.NA	P27540	0.994329	0.888861	0.888861	0.599844	0.456366	0.631803	0.602712	0.288971	0.766265	0.843634	0.936868	0.26482	0.245065	ARNT	cluster 4
CFP	uniprot.P27918_ukb.OID30784_decode.2960_66	P27918	0.0107087	0.0102881	0.0102881	0.00565714	0.734935	0.0109717	0.0133203	0.697321	0.00276397	0.68145	0.105204	1.41e-05	0.55495	CFP	cluster 2
IL1R2	uniprot.P27930_ukb.OID20757_decode.14133_93	P27930	0.291373	0.256049	0.256049	0.379228	0.0223134	0.141924	0.122942	0.0174221	0.490043	0.544068	0.65545	0.00168185	0.657463	IL1R2	cluster 3
CST5	uniprot.P28325_ukb.OID20995_decode.3803_10	P28325	0.299053	0.347042	0.347042	0.79652	0.000262957	0.518712	0.486932	0.85315	0.608886	0.544068	0.289297	0.154224	0.248768	CST5	cluster 4
PTPRM	uniprot.P28827_ukb.OID20598_decode.NA	P28827	0.0179025	0.0101203	0.0101203	7.5e-05	0.0199308	0.000166972	0.000250083	0.972552	0.26592	0.757666	0.875523	0.0871231	0.824891	PTPRM	cluster 2
HSD11B1	uniprot.P28845_ukb.OID20575_decode.NA	P28845	0.00374713	0.00366039	0.00366039	0.00614551	0.974243	0.0629813	0.0924408	0.118666	0.00143634	0.577611	0.000998965	2.18e-07	0.0195244	HSD11B1	cluster 5
CD34	uniprot.P28906_ukb.OID21025_decode.NA	P28906	0.000601792	0.000756139	0.000756139	0.283389	6.47e-12	0.000552952	9.09e-05	0.743665	0.784967	0.842753	0.68596	0.00102317	0.824891	CD34	cluster 4
CCN2	uniprot.P29279_ukb.OID20709_decode.2975_19	P29279	0.0365505	0.0300486	0.0300486	0.164078	0.660449	0.513214	0.587492	0.701938	0.605445	0.840845	0.958275	0.476195	0.518218	CCN2	cluster 3
PTPN6	uniprot.P29350_ukb.OID20717_decode.4318_12	P29350	0.691337	0.685132	0.685132	0.550757	0.148701	0.28707	0.27582	0.489968	0.742757	0.645309	0.698282	0.605679	0.79885	PTPN6	cluster 3
IL12B	uniprot.P29460_ukb.OID20666_decode.13733_5	P29460	8.68e-06	5.57e-06	5.57e-06	6.53e-11	3.28e-08	6.91e-13	4.59e-13	0.587035	0.0105325	0.839819	0.141162	0.000287707	0.0136335	IL12B	cluster 2
SERPINA4	uniprot.P29622_ukb.OID30774_decode.3449_58	P29622	0.141192	0.131416	0.131416	0.0360777	0.371364	0.0613817	0.0722116	0.934953	0.892865	0.635861	0.370046	0.227136	0.76847	SERPINA4	cluster 3
CD40LG	uniprot.P29965_ukb.OID20616_decode.3534_14	P29965	0.414098	0.410323	0.410323	0.645441	0.0898269	0.351617	0.314553	0.640315	0.376799	0.619418	0.250536	0.966601	0.734956	CD40LG	cluster 3
ERP29	uniprot.P30040_ukb.OID30578_decode.13728_19	P30040	0.0118559	0.0121176	0.0121176	0.354086	0.178622	0.966035	0.985793	0.633929	0.527651	0.574029	0.243579	0.133437	0.992132	ERP29	cluster 3
PRDX5	uniprot.P30044_ukb.OID20644_decode.5017_19	P30044	0.271862	0.239023	0.239023	0.88697	0.161531	0.542205	0.524588	0.733307	0.92553	0.638163	0.61004	0.454814	0.992132	PRDX5	cluster 3
GCHFR	uniprot.P30047_ukb.OID30631_decode.NA	P30047	8.68e-06	5.06e-06	5.06e-06	6.38e-13	1.11e-08	1.99e-15	9.48e-16	0.549694	0.000811427	0.538513	0.384151	8.65e-08	0.0120651	GCHFR	cluster 6
PRDX3	uniprot.P30048_ukb.OID20483_decode.8358_30	P30048	0.0281273	0.0180103	0.0180103	0.187653	0.640785	0.598744	0.644173	0.790053	0.19263	0.536007	0.101654	0.57017	0.702198	PRDX3	cluster 3
PDIA3	uniprot.P30101_ukb.OID30573_decode.4719_58	P30101	0.00110881	0.000701445	0.000701445	1.58e-06	0.00795006	5.98e-06	9.24e-06	0.651694	0.398995	0.986319	0.567503	0.00129725	0.00533687	PDIA3	cluster 2
CD6	uniprot.P30203_ukb.OID20649_decode.NA	P30203	0.0105592	0.0117318	0.0117318	0.0558764	0.384015	0.274515	0.348881	0.792413	0.0748325	0.757487	0.0872564	0.00015016	0.965502	CD6	cluster 3
PKLR	uniprot.P30613_ukb.OID20682_decode.15607_56	P30613	0.89412	0.868787	0.868787	0.348079	0.211482	0.293832	0.278755	0.995291	0.574901	0.922562	0.886503	0.566056	0.895199	PKLR	cluster 3
ALDH3A1	uniprot.P30838_ukb.OID20512_decode.11480_1	P30838	0.58762	0.562596	0.562596	0.809541	0.733044	0.998134	0.973042	0.780772	0.721446	0.839819	0.463416	0.188883	0.975432	ALDH3A1	cluster 3
PRDX2	uniprot.P32119_ukb.OID30668_decode.NA	P32119	0.994329	0.955916	0.955916	0.363903	0.27562	0.317298	0.321195	0.344847	0.631267	0.321173	0.109183	0.987663	0.86371	PRDX2	cluster 4
DCTD	uniprot.P32321_ukb.OID30657_decode.17756_69	P32321	0.161055	0.193277	0.193277	0.79972	0.0440108	0.337223	0.307068	0.549694	0.953209	0.571458	0.411412	0.511476	0.801835	DCTD	cluster 3
GBP2	uniprot.P32456_ukb.OID20489_decode.18891_98	P32456	0.0971296	0.0741497	0.0741497	0.0588047	0.359098	0.0910069	0.0867921	0.631592	0.888197	0.544068	0.425107	0.0126804	0.910379	GBP2	cluster 2
CD70	uniprot.P32970_ukb.OID20599_decode.5807_77	P32970	0.141192	0.134368	0.134368	0.115079	0.146208	0.118983	0.119132	0.592292	0.1751	0.971718	0.285684	0.235215	0.702432	CD70	cluster 6
LSP1	uniprot.P33241_ukb.OID20530_decode.NA	P33241	0.000777343	0.000623175	0.000623665	7.11e-07	0.0027956	2.31e-07	3.22e-07	0.871949	0.000473909	0.986319	0.0492897	8.82e-07	0.0373719	LSP1	cluster 6
RNASE4	uniprot.P34096_ukb.OID30705_decode.5644_60	P34096	0.00263741	0.00235213	0.00235213	0.000473948	0.000814779	0.000339106	0.000338188	0.0400594	0.00224326	0.934108	0.0149915	0.00117616	0.00410468	RNASE4	cluster 6
SHMT1	uniprot.P34896_ukb.OID20714_decode.12334_25	P34896	0.220801	0.223999	0.223999	0.51316	0.283064	0.831233	0.738181	0.596716	0.624408	0.762426	0.60253	0.240172	0.804985	SHMT1	cluster 3
CA8	uniprot.P35219_ukb.OID30482_decode.11390_24	P35219	0.511189	0.515255	0.515255	0.512765	0.855709	0.665665	0.714443	0.831757	0.254608	0.759651	0.963353	0.729006	0.932686	CA8	cluster 4
IL13	uniprot.P35225_ukb.OID20430_decode.3072_4	P35225	0.0816278	0.0749011	0.0749011	0.415513	0.293368	0.947191	0.973042	0.955611	0.913812	0.544068	0.347384	0.74816	0.758959	IL13	cluster 4
SAA4	uniprot.P35542_ukb.OID30726_decode.15516_12	P35542	0.774561	0.72832	0.72832	0.376221	0.0990486	0.150018	0.117611	0.701938	0.110106	0.932756	0.160561	0.00985021	0.943719	SAA4	cluster 3
ADD1	uniprot.P35611_ukb.OID30655_decode.NA	P35611	0.0743247	0.0686956	0.0686956	0.748884	0.240143	0.728732	0.714443	0.815515	0.70318	0.774192	0.555835	0.488621	0.975432	ADD1	cluster 3
BSG	uniprot.P35613_ukb.OID20626_decode.3585_54	P35613	0.00231692	0.000606502	0.000606502	2.55e-18	1.02e-22	3.46e-26	3.2e-27	0.0400594	2.46e-05	0.273748	0.480036	0.349283	0.00991238	BSG	cluster 6
TIMP3	uniprot.P35625_ukb.OID20684_decode.2480_58	P35625	0.00589242	0.00402882	0.00402882	0.261908	0.160762	0.865585	0.954221	0.488771	0.196011	0.839819	0.326228	0.294306	0.797768	TIMP3	cluster 3
CPOX	uniprot.P36551_ukb.OID30495_decode.18241_18	P36551	0.126004	0.121602	0.121586	0.0989976	0.783475	0.230225	0.267649	0.630056	0.787029	0.937857	0.692451	0.232287	0.714212	CPOX	cluster 4
TGFBR1	uniprot.P36897_ukb.OID30502_decode.NA	P36897	0.24803	0.229194	0.229194	0.20416	0.212315	0.220706	0.218353	0.605206	0.328646	0.578276	0.831639	0.535601	0.367809	TGFBR1	cluster 5
LTBR	uniprot.P36941_ukb.OID20768_decode.2636_10	P36941	0.00267295	0.00235213	0.00235213	0.00019954	0.000239806	0.000130249	0.000116096	0.00213441	0.0132627	0.579824	0.201758	0.0407213	0.00314394	LTBR	cluster 6
SERPINF1	uniprot.P36955_ukb.OID30757_decode.9211_19	P36955	5.83e-07	3.66e-07	3.66e-07	5.58e-14	6.65e-14	9.23e-18	3.07e-18	0.000525041	1.33e-10	0.68145	5.67e-05	6.27e-09	2.47e-05	SERPINF1	cluster 6
GMPR	uniprot.P36959_ukb.OID20641_decode.19254_125	P36959	NA	NA	NA	NA	NA	NA	NA	NA	NA	NA	NA	NA	NA	GMPR	#N/A
CFHR2	uniprot.P36980_ukb.OID30720_decode.15584_9	P36980	0.422464	0.412541	0.412541	0.478863	0.492718	0.525702	0.522349	0.651694	0.382123	0.986319	0.543978	0.486561	0.702198	CFHR2	cluster 2
HPCAL1	uniprot.P37235_ukb.OID20615_decode.17791_25	P37235	0.39502	0.392584	0.392584	0.665268	0.148495	0.366922	0.354147	0.25079	0.769178	0.434892	0.292575	0.620825	0.824891	HPCAL1	cluster 3
SNCA	uniprot.P37840_ukb.OID30645_decode.8458_111	P37840	0.0490979	0.0468368	0.0468368	0.675862	0.0948082	0.761296	0.729769	0.549694	0.414214	0.810775	0.384688	0.0177725	0.975432	SNCA	cluster 3
MMP12	uniprot.P39900_ukb.OID21439_decode.4496_60	P39900	0.000193677	0.000138961	0.000138961	2.27e-07	0.00122791	1.35e-07	2.17e-07	0.55342	0.03457	0.839819	0.108204	6.54e-07	0.00853944	MMP12	cluster 2
GDNF	uniprot.P39905_ukb.OID20861_decode.5822_22	P39905	0.0293006	0.0143316	0.0143316	0.000177275	0.0027956	0.000264689	0.000270048	0.609565	0.033428	0.431712	0.991376	0.0185023	0.284062	GDNF	cluster 2
GP5	uniprot.P40197_ukb.OID30611_decode.7185_29	P40197	0.0985299	0.103607	0.103607	0.870573	0.101657	0.679874	0.644173	0.578611	0.892657	0.530656	0.384151	0.357589	0.518218	GP5	cluster 3
CD79B	uniprot.P40259_ukb.OID20635_decode.6351_55	P40259	0.000843879	0.000694983	0.000694983	2.24e-06	2.22e-06	2.92e-07	2.33e-07	0.578611	0.000215733	0.577399	0.0966597	0.0235995	0.106829	CD79B	cluster 6
MDH1	uniprot.P40925_ukb.OID30669_decode.3853_56	P40925	0.0721877	0.0840322	0.0840322	0.718469	0.151715	0.750186	0.714443	0.679734	0.359145	0.955118	0.613076	0.0919468	0.9645	MDH1	cluster 3
IL15	uniprot.P40933_ukb.OID20562_decode.19568_17	P40933	0.189958	0.210005	0.210005	0.977944	0.205229	0.728732	0.668658	0.906773	0.703724	0.986319	0.852967	0.462398	0.40189	IL15	cluster 4
LEP	uniprot.P41159_ukb.OID20187_decode.8484_24	P41159	1.97e-10	1.65e-10	1.65e-10	4.13e-22	0.00372929	5.11e-25	4.67e-24	0.00788775	1.33e-10	0.842731	0.00259256	2.91e-15	0.00172106	LEP	cluster 6
CD200	uniprot.P41217_ukb.OID20603_decode.5112_73	P41217	0.00253232	0.00492193	0.00492193	0.0311872	1.13e-07	0.000118068	5.09e-05	0.797401	0.395871	0.601071	0.160561	0.0016152	0.357546	CD200	cluster 4
CASP2	uniprot.P42575_ukb.OID20555_decode.4904_7	P42575	0.353601	0.324122	0.324122	0.421776	0.0168311	0.179404	0.153298	0.419182	0.944763	0.649077	0.516892	0.536916	0.69574	CASP2	cluster 3
IL12RB1	uniprot.P42701_ukb.OID20486_decode.2632_5	P42701	0.108091	0.107322	0.107322	0.109656	0.146208	0.111276	0.112482	0.777565	0.30232	0.840845	0.42842	0.216571	0.261973	IL12RB1	cluster 2
LIFR	uniprot.P42702_ukb.OID20606_decode.5837_49	P42702	0.0129947	0.0173685	0.0173685	0.304078	0.251329	0.895717	0.973042	0.424911	0.437481	0.778211	0.320929	0.0571632	0.670008	LIFR	cluster 4
WAS	uniprot.P42768_ukb.OID20479_decode.NA	P42768	0.395049	0.396024	0.396024	0.715279	0.199928	0.44867	0.418465	0.734934	0.990524	0.453455	0.244231	0.792993	0.98696	WAS	cluster 3
CXCL5	uniprot.P42830_ukb.OID20207_decode.2979_8	P42830	0.0159063	0.0164915	0.0164915	0.452374	0.031287	0.849393	0.738181	0.587035	0.270034	0.431712	0.0883158	0.267876	0.943719	CXCL5	cluster 3
CTSO	uniprot.P43234_ukb.OID20660_decode.9264_11	P43234	0.000461019	0.000299667	0.000299667	1.06e-06	0.112129	6.57e-06	1.26e-05	0.792413	0.011412	0.666104	0.0133222	0.000121779	0.890163	CTSO	cluster 2
BTD	uniprot.P43251_ukb.OID30754_decode.15644_1	P43251	0.489934	0.436041	0.436041	0.164078	0.062358	0.113822	0.113018	0.482761	0.773222	0.544068	0.367882	0.0112922	0.273357	BTD	cluster 3
PTPN9	uniprot.P43378_ukb.OID30437_decode.12633_3	P43378	0.774561	0.814627	0.814627	0.910744	0.690446	0.880101	0.857788	0.792413	0.824937	0.810775	0.637961	0.829279	0.779054	PTPN9	cluster 4
TNFRSF4	uniprot.P43489_ukb.OID20653_decode.3730_81	P43489	8.87e-08	2.46e-08	2.46e-08	4.68e-23	1.53e-15	5.26e-32	3.14e-32	0.016716	4.09e-06	0.0836382	0.337982	0.000521904	0.00528033	TNFRSF4	cluster 6
AFM	uniprot.P43652_ukb.OID30741_decode.4763_31	P43652	1.07e-05	1.05e-05	1.05e-05	0.63342	7.84e-06	0.217346	0.121632	0.815515	0.178654	0.34344	0.00656203	1.42e-13	0.875082	AFM	cluster 2
MMP13	uniprot.P45452_ukb.OID20807_decode.4925_54	P45452	0.0224334	0.0265639	0.0265844	0.493517	0.00416414	0.06484	0.0392794	0.741948	0.713679	0.536007	0.240484	0.201649	0.759835	MMP13	cluster 4
MAPK9	uniprot.P45984_ukb.OID20557_decode.15604_18	P45984	0.4045	0.324642	0.324642	0.165528	0.393615	0.252261	0.256526	0.697456	0.454883	0.740079	0.377645	0.135775	0.327528	MAPK9	cluster 3
MKI67	uniprot.P46013_ukb.OID30455_decode.NA	P46013	0.626066	0.617647	0.617647	0.599844	0.642483	0.656144	0.660214	0.85695	0.519536	0.930747	0.645711	0.53687	0.852658	MKI67	cluster 2
CRKL	uniprot.P46109_ukb.OID20742_decode.9877_28	P46109	0.0351348	0.0366566	0.0366566	0.609674	0.100268	0.816215	0.760786	0.651694	0.503951	0.572645	0.27893	0.150174	0.957612	CRKL	cluster 3
PLA2G4A	uniprot.P47712_ukb.OID20685_decode.NA	P47712	0.0490979	0.0452033	0.0452033	0.969083	0.0315477	0.420521	0.368618	0.702188	0.193368	0.469955	0.0765747	0.53687	0.824891	PLA2G4A	cluster 3
FASLG	uniprot.P48023_ukb.OID20665_decode.3052_8	P48023	0.89412	0.880205	0.880205	0.614455	0.54271	0.609851	0.622426	0.78321	0.0417731	0.922562	0.24444	0.143588	0.16773	FASLG	cluster 4
GIPR	uniprot.P48546_ukb.OID30542_decode.NA	P48546	NA	NA	NA	NA	NA	NA	NA	NA	NA	NA	NA	NA	NA	GIPR	#N/A
CSNK1D	uniprot.P48730_ukb.OID30492_decode.11289_31	P48730	0.929995	0.909406	0.909406	0.953849	0.709596	0.813975	0.849055	0.344847	0.936292	0.806585	0.617308	0.165872	0.910379	CSNK1D	cluster 3
CEBPA	uniprot.P49715_ukb.OID30458_decode.18874_66	P49715	0.00154431	0.00108093	0.00108093	0.000649717	0.0832844	0.00220656	0.00284986	0.752834	0.0170117	0.782918	0.21987	0.0112395	0.657463	CEBPA	cluster 6
NUMB	uniprot.P49757_ukb.OID30568_decode.NA	P49757	0.00109563	0.00115293	0.00115293	0.0307996	0.587518	0.293416	0.348818	0.914819	0.0633341	0.575373	0.0693611	0.00515276	0.58578	NUMB	cluster 3
PGF	uniprot.P49763_ukb.OID20673_decode.3078_1	P49763	6.93e-05	5.97e-05	5.97e-05	0.000131441	0.0065301	0.000288898	0.000323122	0.224371	0.0139148	0.039668	0.758952	0.00187642	0.0340402	PGF	cluster 6
VEGFB	uniprot.P49765_ukb.OID30554_decode.9453_12	P49765	1.59e-05	7.88e-06	7.88e-06	8.43e-11	2.82e-06	3.88e-12	4.14e-12	0.379719	0.000324299	0.431712	0.394568	1.74e-06	0.162829	VEGFB	cluster 6
FLT3LG	uniprot.P49771_ukb.OID20661_decode.14093_10	P49771	0.0690508	0.0918248	0.0918248	0.675862	0.153235	0.941228	0.882875	0.697456	0.17194	0.806585	0.715086	0.0416795	0.234956	FLT3LG	cluster 4
KLK7	uniprot.P49862_ukb.OID30652_decode.3378_49	P49862	0.186803	0.186792	0.186792	0.252915	0.546522	0.481239	0.513617	0.663897	0.788635	0.839819	0.621165	0.848603	0.714212	KLK7	cluster 5
SELENOP	uniprot.P49908_ukb.OID30745_decode.NA	P49908	0.0133485	0.0140899	0.0140899	0.069677	0.533475	0.340014	0.456929	0.918187	0.0753827	0.866396	0.394207	0.447897	0.0201449	SELENOP	cluster 5
MMP14	uniprot.P50281_ukb.NA_decode.5002_76	P50281	NA	NA	NA	NA	NA	NA	NA	NA	NA	NA	NA	NA	NA	MMP14	#N/A
SERPINB8	uniprot.P50452_ukb.OID20630_decode.19130_81	P50452	0.216806	0.222127	0.222127	0.262641	0.326585	0.288449	0.296751	0.991856	0.483282	0.757666	0.476492	0.260246	0.468512	SERPINB8	cluster 2
ST13	uniprot.P50502_ukb.OID30624_decode.18387_7	P50502	0.101511	0.0837198	0.0837198	0.108693	0.770827	0.261918	0.267154	0.843797	0.0506835	0.757666	0.4942	0.222558	0.889373	ST13	cluster 3
VASP	uniprot.P50552_ukb.OID30692_decode.9762_14	P50552	0.422684	0.423593	0.423593	0.731691	0.133163	0.360748	0.368618	0.928909	0.446189	0.820786	0.384151	0.452426	0.742886	VASP	cluster 3
TNFSF10	uniprot.P50591_ukb.OID20611_decode.8833_20	P50591	0.00107306	0.000875547	0.000875982	0.0229051	0.161531	0.360162	0.510709	0.675263	0.953209	0.686578	0.366872	0.732739	0.895199	TNFSF10	cluster 3
ANXA11	uniprot.P50995_ukb.OID20583_decode.17513_11	P50995	0.426385	0.443155	0.443155	0.90782	0.177514	0.598381	0.591412	0.743991	0.828649	0.940972	0.858827	0.413986	0.801835	ANXA11	cluster 3
IRAK1	uniprot.P51617_ukb.OID20485_decode.NA	P51617	0.00382345	0.00390529	0.00390529	0.32131	0.117379	0.974299	0.973042	0.696935	0.278878	0.434892	0.0883158	0.0967327	0.939814	IRAK1	cluster 3
CCL11	uniprot.P51671_ukb.OID20668_decode.5301_7	P51671	0.43208	0.391059	0.391059	0.108248	0.264684	0.0901586	0.109908	0.55342	0.747088	0.757487	0.533692	0.550931	0.515353	CCL11	cluster 3
PRELP	uniprot.P51888_ukb.OID20766_decode.NA	P51888	0.718963	0.933312	0.933312	6.56e-09	2.07e-30	2.07e-15	1.27e-16	0.2313	5.1e-07	0.431712	0.130521	0.0686331	0.000880231	PRELP	cluster 2
MAP2K6	uniprot.P52564_ukb.OID20552_decode.17175_5	P52564	0.316902	0.339883	0.339883	0.762151	0.161465	0.445028	0.414311	0.825261	0.859901	0.434892	0.198253	0.51139	0.943719	MAP2K6	cluster 3
STAT2	uniprot.P52630_ukb.OID30536_decode.NA	P52630	0.000184002	0.000258421	0.000258421	0.0185434	0.305422	0.282067	0.356094	0.675263	0.20765	0.465725	0.0693611	0.022084	0.772429	STAT2	cluster 3
RIDA	uniprot.P52758_ukb.OID30635_decode.14636_25	P52758	8.96e-08	4.8e-08	4.8e-08	4e-15	0.000262795	2.41e-14	8.97e-14	0.430669	2.62e-07	0.757666	0.00012944	1.14e-14	0.00551836	RIDA	cluster 6
CTSC	uniprot.P53634_ukb.OID20679_decode.3178_5	P53634	0.0414994	0.0418298	0.0418487	0.159375	0.148495	0.592656	0.71927	0.800809	0.961618	0.935372	0.910441	0.134712	0.730505	CTSC	cluster 3
CRISP3	uniprot.P54108_ukb.OID30715_decode.3187_52	P54108	0.474341	0.470291	0.470291	0.923942	0.51689	0.865585	0.849055	0.780717	0.686869	0.4854	0.331022	0.0234419	0.480042	CRISP3	cluster 4
TERF1	uniprot.P54274_ukb.OID30480_decode.10049_112	P54274	NA	NA	NA	NA	NA	NA	NA	NA	NA	NA	NA	NA	NA	TERF1	#N/A
PNLIPRP2	uniprot.P54317_ukb.OID20775_decode.15471_29	P54317	0.496583	0.481017	0.481017	0.70796	0.947846	0.804234	0.816014	0.549694	0.305293	0.810775	0.872657	0.247551	0.639297	PNLIPRP2	cluster 4
EPHA4	uniprot.P54764_ukb.OID30622_decode.16288_17	P54764	0.783543	0.83885	0.83885	1.12e-08	2.83e-18	1.38e-13	3.1e-14	0.218302	0.437481	0.228677	0.164488	0.585413	0.273357	EPHA4	cluster 2
MFAP4	uniprot.P55083_ukb.OID30598_decode.5636_10	P55083	0.00378208	0.00363551	0.00363551	0.00194423	0.485947	0.013114	0.0201805	0.734934	0.787486	0.63273	0.421605	0.0242646	0.367809	MFAP4	cluster 4
MANF	uniprot.P55145_ukb.OID20707_decode.9223_11	P55145	0.0210362	0.0196556	0.0196556	0.51316	0.117379	0.880101	0.83724	0.407534	0.616065	0.513502	0.198253	0.143043	0.945313	MANF	cluster 3
CASP9	uniprot.P55211_ukb.OID30530_decode.NA	P55211	0.18293	0.155841	0.155841	0.846044	0.413473	0.884579	0.844444	0.812032	0.342626	0.544068	0.115079	0.110197	0.968717	CASP9	cluster 3
BID	uniprot.P55957_ukb.OID20517_decode.5798_3	P55957	0.00388917	0.00437306	0.00437306	0.170874	0.156563	0.750186	0.834767	0.781469	0.333503	0.800895	0.327897	0.00451948	0.711356	BID	cluster 2
MARS1	uniprot.P56192_ukb.OID30658_decode.NA	P56192	0.0107675	0.0116684	0.0116684	0.460327	0.124938	0.967287	0.915758	0.611914	0.35751	0.547967	0.191553	0.0571632	0.957612	MARS1	cluster 3
LGALS4	uniprot.P56470_ukb.OID20748_decode.2982_82	P56470	0.000960106	0.000736883	0.000736883	1.17e-06	0.000339716	2.08e-07	1.43e-07	0.901872	0.00480129	0.431712	0.00281172	4.26e-10	5.5e-05	LGALS4	cluster 2
PER3	uniprot.P56645_ukb.OID30511_decode.NA	P56645	0.332416	0.359752	0.359752	0.911515	0.149863	0.605436	0.538597	0.450281	0.367381	0.453455	0.112127	0.170461	0.510907	PER3	cluster 3
RGS8	uniprot.P57771_ukb.OID20454_decode.11666_72	P57771	0.102256	0.10387	0.10387	0.120741	0.58268	0.181907	0.192789	0.828129	0.800765	0.929082	0.800955	0.3322	0.558988	RGS8	cluster 2
PROK1	uniprot.P58294_ukb.OID20543_decode.2247_20	P58294	0.378719	0.359752	0.359752	0.692591	0.178999	0.48863	0.439963	0.675263	0.359965	0.811353	0.355512	0.748683	0.82544	PROK1	cluster 3
IL2	uniprot.P60568_ukb.OID20419_decode.3070_1	P60568	0.137267	0.155841	0.155841	0.665268	0.320887	0.992882	0.871675	0.972552	0.13096	0.922562	0.323221	0.356157	0.943719	IL2	cluster 2
FGF12	uniprot.P61328_ukb.OID30454_decode.4392_54	P61328	0.783901	0.850762	0.850762	0.692591	0.65108	0.726055	0.729769	0.825261	0.828649	0.817324	0.693463	0.699567	0.833241	FGF12	cluster 2
PCBD1	uniprot.P61457_ukb.OID30610_decode.11313_100	P61457	1.08e-06	4.43e-07	4.43e-07	2.73e-08	0.470439	1.88e-05	6.83e-05	0.812032	1.93e-05	0.544068	0.000416267	2.91e-15	0.18607	PCBD1	cluster 2
RAP1A	uniprot.P62834_ukb.OID30452_decode.NA	P62834	0.665688	0.749818	0.749818	0.511613	0.113808	0.285213	0.257392	0.807027	0.827627	0.544068	0.394568	0.208637	0.674679	RAP1A	cluster 4
EIF5A	uniprot.P63241_ukb.OID20423_decode.5888_29	P63241	0.265217	0.23216	0.23216	0.163988	0.433383	0.175501	0.190007	0.675263	0.905848	0.832802	0.68596	0.78666	0.263121	EIF5A	cluster 5
FKBP1B	uniprot.P68106_ukb.OID20618_decode.11568_2	P68106	0.417424	0.425879	0.425879	0.706451	0.293368	0.941267	0.915758	0.781469	0.847649	0.431712	0.332548	0.169818	0.294021	FKBP1B	cluster 3
CXADR	uniprot.P78310_ukb.OID20561_decode.11204_80	P78310	0.0100167	0.00764771	0.00764771	1.08e-05	0.000207417	4.26e-06	3.43e-06	0.815515	0.0133924	0.544068	0.0185008	3.91e-05	0.00853944	CXADR	cluster 2
SRPK2	uniprot.P78362_ukb.OID20502_decode.NA	P78362	0.000960106	0.000851461	0.000851461	0.0773139	0.310279	0.508125	0.59829	0.987384	0.0887252	0.547967	0.0939847	0.0493802	0.975432	SRPK2	cluster 3
BTN3A2	uniprot.P78410_ukb.OID20540_decode.NA	P78410	3.33e-06	2.27e-06	2.27e-06	4.76e-12	3.01e-06	1.36e-13	1.67e-13	0.85315	0.00309985	0.544068	0.0114244	1.08e-10	0.00136905	BTN3A2	cluster 6
CX3CL1	uniprot.P78423_ukb.OID20976_decode.2827_23	P78423	0.0432986	0.0255976	0.0255976	7.11e-07	4.69e-09	1.84e-08	1.1e-08	0.00285658	0.14364	0.986319	0.421605	0.971005	0.0501148	CX3CL1	cluster 2
CCL7	uniprot.P80098_ukb.OID20523_decode.4886_3	P80098	6.27e-05	5.67e-05	5.67e-05	7.34e-06	0.824541	0.000247397	0.000700049	0.85315	0.00631135	0.60721	0.0223772	0.000218109	0.325488	CCL7	cluster 2
CXCL6	uniprot.P80162_ukb.OID20613_decode.3495_15	P80162	0.0369167	0.0323405	0.0323405	0.00435639	0.345482	0.00798051	0.00724366	0.549694	0.261441	0.564361	0.124851	0.0268149	0.294021	CXCL6	cluster 3
S100A12	uniprot.P80511_ukb.OID21374_decode.5852_6	P80511	0.0089099	0.0105196	0.0105196	0.00254007	0.679237	0.00963635	0.0177526	0.732803	0.0759239	0.934108	0.246161	0.00588991	0.0801242	S100A12	cluster 3
DEFB103A_DEFB103B	uniprot.P81534_ukb.OID30534_decode.5679_16	P81534	0.12718	0.1161	0.1161	0.547611	0.319732	0.983215	0.973042	0.640315	0.444512	0.544068	0.210572	0.151198	0.909162	DEFB103A_DEFB103B	cluster 3
PRR5	uniprot.P85299_ukb.OID30457_decode.NA	P85299	NA	NA	NA	NA	NA	NA	NA	NA	NA	NA	NA	NA	NA	PRR5	#N/A
XIAP	uniprot.P98170_ukb.OID30490_decode.NA	P98170	0.0168963	0.021367	0.021367	0.363903	0.275653	0.865585	0.903365	0.781469	0.419593	0.550352	0.218109	0.084966	0.975432	XIAP	cluster 3
CD83	uniprot.Q01151_ukb.OID20565_decode.5065_8	Q01151	1.17e-06	4.57e-07	4.57e-07	3.74e-16	2.04e-14	1.57e-22	1.09e-22	0.144521	1.45e-05	0.473097	0.10813	1.23e-06	0.0113575	CD83	cluster 6
RELB	uniprot.Q01201_ukb.OID30463_decode.11464_9	Q01201	0.209637	0.221953	0.221953	0.5818	0.564662	0.878233	0.95993	0.833009	0.703107	0.757666	0.780944	0.774857	0.943719	RELB	cluster 3
IL5RA	uniprot.Q01344_ukb.OID20601_decode.13686_2	Q01344	0.0165139	0.0118008	0.0118008	0.386794	0.161358	0.979664	0.929976	0.593696	0.953209	0.932756	0.858439	0.774857	0.859094	IL5RA	cluster 3
CTBS	uniprot.Q01459_ukb.OID30710_decode.NA	Q01459	1.41e-05	1.32e-05	1.32e-05	0.000620962	0.553071	0.0421344	0.069637	0.415287	0.149152	0.557248	0.0836705	0.000618957	0.595678	CTBS	cluster 3
TNFRSF17	uniprot.Q02223_ukb.OID30589_decode.2665_26	Q02223	0.0201853	0.00863299	0.00863299	6.48e-09	1.3e-10	7.91e-12	3.69e-12	0.702188	0.136152	0.567401	0.780374	0.000535411	0.000126595	TNFRSF17	cluster 2
TOP2B	uniprot.Q02880_ukb.OID30559_decode.NA	Q02880	8.03e-06	9.75e-06	9.75e-06	0.000746551	0.485947	0.0512701	0.0795003	0.828129	0.0365976	0.797597	0.106507	0.000551192	0.735098	TOP2B	cluster 2
AKAP12	uniprot.Q02952_ukb.OID30571_decode.NA	Q02952	0.0115759	0.0154876	0.0154876	0.932033	0.00819701	0.220706	0.171892	0.633929	0.624408	0.473097	0.144578	0.457603	0.633577	AKAP12	cluster 5
TFF2	uniprot.Q03403_ukb.OID20787_decode.9191_8	Q03403	0.0164125	0.0117318	0.0117318	6.55e-06	2.8e-06	3.29e-07	2.38e-07	0.697321	0.33413	0.544068	0.0994861	0.0277598	0.000384037	TFF2	cluster 2
PLAUR	uniprot.Q03405_ukb.OID20764_decode.2652_15	Q03405	0.00234794	0.00157247	0.00157247	8.73e-07	1.82e-09	1.84e-08	9.77e-09	0.842031	0.000504834	0.70683	0.159519	0.000117616	0.0208006	PLAUR	cluster 2
MVK	uniprot.Q03426_ukb.OID20459_decode.11391_69	Q03426	0.000219269	0.000188078	0.000188078	0.0057623	0.151715	0.292823	0.401906	0.631592	0.0282823	0.469955	0.0227194	0.000148317	0.975432	MVK	cluster 2
PTH1R	uniprot.Q03431_ukb.OID20571_decode.13470_43	Q03431	0.00559533	0.00507519	0.00507519	5.15e-05	0.155191	0.000118068	0.000195028	0.767876	0.14364	0.757666	0.136508	0.000793719	0.0340402	PTH1R	cluster 2
UBXN1	uniprot.Q04323_ukb.OID30654_decode.NA	Q04323	0.000155905	0.000211795	0.000211795	0.0209886	0.326585	0.284408	0.371178	0.711881	0.188512	0.731656	0.223613	0.0270286	0.943719	UBXN1	cluster 3
FOLH1	uniprot.Q04609_ukb.OID30430_decode.5478_50	Q04609	0.8638	0.749818	0.749818	0.623133	0.737362	0.726055	0.70493	0.575493	0.0947313	0.920524	0.289297	0.0285514	0.233784	FOLH1	cluster 3
EIF4G1	uniprot.Q04637_ukb.OID20625_decode.NA	Q04637	0.00022194	0.000240851	0.000240851	0.146255	0.0596935	0.8472	0.935247	0.675263	0.1751	0.431712	0.0582286	0.0796406	0.968275	EIF4G1	cluster 3
HGFAC	uniprot.Q04756_ukb.OID30718_decode.3617_80	Q04756	0.249646	0.286323	0.286323	0.799842	0.161531	0.420521	0.374782	0.697321	0.465749	0.930747	0.447657	0.74816	0.493516	HGFAC	cluster 4
PRKCQ	uniprot.Q04759_ukb.OID20468_decode.3817_18	Q04759	0.844407	0.800675	0.800675	0.784972	0.46113	0.633739	0.629625	0.792413	0.600019	0.922562	0.881339	0.529642	0.969924	PRKCQ	cluster 3
SSBP1	uniprot.Q04837_ukb.OID30468_decode.NA	Q04837	0.801587	0.791726	0.791726	0.706192	0.692664	0.758159	0.761331	0.934953	0.745386	0.843634	0.874388	0.722767	0.880468	SSBP1	cluster 2
ICA1	uniprot.Q05084_ukb.OID20484_decode.NA	Q05084	0.0985299	0.0953734	0.0953734	0.731588	0.0133285	0.220706	0.18149	0.733307	0.232418	0.431712	0.0610217	0.468176	0.558988	ICA1	cluster 3
GAD2	uniprot.Q05329_ukb.OID30449_decode.NA	Q05329	NA	NA	NA	NA	NA	NA	NA	NA	NA	NA	NA	NA	NA	GAD2	#N/A
SULT2A1	uniprot.Q06520_ukb.OID20508_decode.9829_91	Q06520	3.94e-05	2.83e-05	2.83e-05	1.62e-07	0.112684	7.09e-07	1.47e-06	0.756032	0.000620866	0.839819	0.0298293	5.4e-10	0.0664413	SULT2A1	cluster 2
CKAP4	uniprot.Q07065_ukb.OID20617_decode.7221_56	Q07065	0.000279076	0.000183988	0.000184048	3.13e-09	2.32e-12	8.59e-12	3.34e-12	2.2e-05	2.73e-05	0.572645	0.0818246	0.00117635	7.94e-06	CKAP4	cluster 6
PCDH1	uniprot.Q08174_ukb.OID20614_decode.NA	Q08174	0.0254803	0.0174581	0.0174581	7.11e-07	4.6e-08	1.58e-08	1.1e-08	0.756032	0.87522	0.832074	0.704042	0.0405984	0.000613803	PCDH1	cluster 6
IL10RB	uniprot.Q08334_ukb.OID20696_decode.2631_50	Q08334	7.47e-06	5.57e-06	5.57e-06	6.35e-10	4.83e-08	5.91e-12	2.67e-12	0.250212	7.34e-05	0.763023	0.00779495	0.000332145	0.00308008	IL10RB	cluster 6
LGALS3BP	uniprot.Q08380_ukb.OID30765_decode.5000_52	Q08380	0.00191915	0.00157247	0.00157247	0.0053637	0.246872	0.0791944	0.134606	0.792413	0.0316631	0.975283	0.137926	0.000119127	0.942833	LGALS3BP	cluster 3
FGL1	uniprot.Q08830_ukb.OID30702_decode.5581_28	Q08830	0.510083	0.656903	0.656903	0.0558764	0.0282662	0.0189785	0.0158157	0.776016	0.254257	0.922562	0.676197	0.217293	0.914032	FGL1	cluster 3
EP300	uniprot.Q09472_ukb.OID30438_decode.NA	Q09472	0.0802869	0.0702516	0.0702516	0.0506241	0.359098	0.0901586	0.091656	0.928909	0.716877	0.786329	0.489823	0.100187	0.66683	EP300	cluster 2
FABP9	uniprot.Q0Z7S8_ukb.OID20501_decode.18194_18	Q0Z7S8	0.920874	0.878835	0.878835	0.00565714	8.46e-08	8.93e-06	2.6e-06	0.144521	0.624408	0.986319	0.72437	0.987663	0.558618	FABP9	cluster 4
NEXN	uniprot.Q0ZGT2_ukb.OID30678_decode.NA	Q0ZGT2	0.0164442	0.0199268	0.0199268	0.63654	0.128888	0.796296	0.758955	0.966967	0.616241	0.526676	0.208964	0.961765	0.945313	NEXN	cluster 3
SCRN1	uniprot.Q12765_ukb.OID20542_decode.NA	Q12765	0.23636	0.23216	0.23216	0.380868	0.73371	0.736978	0.767134	0.857613	0.151523	0.530656	0.044786	0.116228	0.55495	SCRN1	cluster 3
FOXO1	uniprot.Q12778_ukb.OID20515_decode.NA	Q12778	0.112109	0.115131	0.115131	0.9951	0.107566	0.57867	0.524588	0.631592	0.20765	0.469955	0.0819685	0.227136	0.611434	FOXO1	cluster 3
MERTK	uniprot.Q12866_ukb.OID20657_decode.NA	Q12866	0.00330588	0.00170781	0.00170781	1.28e-07	1.93e-05	2.7e-08	3.69e-08	0.823451	0.759242	0.940972	0.858827	0.00257196	0.000210653	MERTK	cluster 2
TP53BP1	uniprot.Q12888_ukb.OID30470_decode.NA	Q12888	0.876728	0.848977	0.848977	0.1644	0.156563	0.119081	0.101057	0.488116	0.188327	0.937857	0.319966	0.74816	0.495317	TP53BP1	cluster 4
KLRB1	uniprot.Q12918_ukb.OID20629_decode.10809_14	Q12918	0.00244018	0.00157247	0.00157247	7.29e-09	1.06e-11	5.29e-11	8.7e-12	0.1621	0.0447671	0.835453	0.112059	0.0023397	0.0124817	KLRB1	cluster 2
TRAF2	uniprot.Q12933_ukb.OID20507_decode.NA	Q12933	0.112109	0.107996	0.107996	0.70407	0.31924	0.878233	0.846904	0.751491	0.688782	0.577399	0.411412	0.36634	0.993283	TRAF2	cluster 3
NFATC3	uniprot.Q12968_ukb.OID20470_decode.NA	Q12968	0.530958	0.415688	0.415688	0.0916867	0.359792	0.127598	0.132294	0.776016	0.631267	0.68145	0.862897	2.45e-05	0.310035	NFATC3	cluster 4
IL24	uniprot.Q13007_ukb.OID20440_decode.3321_2	Q13007	0.808573	0.911815	0.911815	0.904006	0.953217	0.979664	0.980836	0.966967	0.941175	0.70683	0.587672	0.735954	0.975432	IL24	cluster 4
TRAF3	uniprot.Q13114-2_ukb.OID30479_decode.NA	Q13114-2	0.772765	0.744083	0.744083	0.33984	0.133366	0.21314	0.188819	0.928909	0.168916	0.757666	0.756478	0.0671426	0.416592	TRAF3	cluster 4
STX5	uniprot.Q13190_ukb.OID30432_decode.NA	Q13190	0.108091	0.101924	0.101924	0.561228	0.284954	0.971626	0.977	0.74681	0.990373	0.567401	0.424456	0.974565	0.75933	STX5	cluster 2
PAPPA	uniprot.Q13219_ukb.OID20421_decode.4148_49	Q13219	0.00649877	0.00419529	0.00419529	0.0003259	0.325965	0.00245708	0.00313512	0.429772	0.837392	0.591448	0.613076	0.0662341	0.0830034	PAPPA	cluster 2
NME3	uniprot.Q13232_ukb.OID20789_decode.NA	Q13232	0.0114423	0.018702	0.018702	0.731255	0.00988314	0.166914	0.13969	0.93947	0.0489953	0.234301	0.725306	0.957728	0.585912	NME3	cluster 4
KLRD1	uniprot.Q13241_ukb.OID20632_decode.NA	Q13241	2.69e-05	1.6e-05	1.6e-05	2e-09	4.88e-05	4.4e-10	5.79e-10	0.596716	0.000365097	0.911383	0.0581408	4.22e-06	0.0344063	KLRD1	cluster 2
SLAMF1	uniprot.Q13291_ukb.OID20496_decode.7953_20	Q13291	0.000370895	0.00015298	0.000153041	8.82e-10	1.68e-08	7.9e-12	6.42e-12	0.843797	9.29e-06	0.469955	0.0598754	1.49e-08	0.0175398	SLAMF1	cluster 6
MYO9B	uniprot.Q13459_ukb.OID20451_decode.NA	Q13459	0.18293	0.162392	0.162392	0.679398	0.605647	0.957282	0.973042	0.55342	0.658271	0.473097	0.222701	0.974565	0.337799	MYO9B	cluster 3
IL18R1	uniprot.Q13478_ukb.OID20652_decode.14079_14	Q13478	0.00090091	0.000867037	0.000867037	0.000393537	0.941651	0.00157737	0.00209015	0.936237	0.00434993	0.4854	0.00685754	0.000941814	0.675189	IL18R1	cluster 2
EIF4EBP2	uniprot.Q13542_ukb.NA_decode.4184_43	Q13542	0.152727	0.169554	0.169554	0.116342	0.518364	0.205077	0.209217	0.878754	0.168916	0.544068	0.0868035	0.0544727	0.466964	EIF4EBP2	cluster 5
DGKZ	uniprot.Q13574_ukb.OID20466_decode.NA	Q13574	0.85779	0.894147	0.894147	0.787456	0.605959	0.728732	0.729769	0.781469	0.48991	0.943549	0.587672	0.951734	0.943719	DGKZ	cluster 2
APOF	uniprot.Q13790_ukb.OID30701_decode.12370_30	Q13790	0.00306643	0.0027322	0.0027322	0.00278365	0.325338	0.0613716	0.0867921	0.746658	0.000138526	0.469955	0.000149444	5.9e-06	0.828865	APOF	cluster 5
PRKG1	uniprot.Q13976_ukb.OID30621_decode.13067_5	Q13976	0.139491	0.158386	0.158386	0.498592	0.0140599	0.115806	0.0922443	0.589367	0.782071	0.490236	0.289297	0.455013	0.674679	PRKG1	cluster 3
IL16	uniprot.Q14005_ukb.OID20633_decode.2774_10	Q14005	8.87e-08	4.8e-08	4.8e-08	1.21e-14	1.21e-05	4.18e-15	5.76e-15	0.807023	0.0249477	0.687265	0.0321723	1.41e-07	0.000369688	IL16	cluster 6
IL18	uniprot.Q14116_ukb.OID20694_decode.5661_15	Q14116	0.00545843	0.00476342	0.00476342	0.00153643	0.139305	0.00177619	0.00170652	0.833009	0.0205433	0.225393	0.00148603	0.00136438	0.113772	IL18	cluster 2
DAG1	uniprot.Q14118_ukb.OID20774_decode.8369_102	Q14118	0.0173521	0.010291	0.010291	0.577911	0.0977858	0.889467	0.831782	0.668711	0.299047	0.912053	0.381266	0.356157	0.843026	DAG1	cluster 3
LY6D	uniprot.Q14210_ukb.OID20708_decode.NA	Q14210	0.0245902	0.0203384	0.0203384	0.00790549	0.00517851	0.00602083	0.00591561	0.434977	0.00136706	0.971718	0.0474799	0.0146065	0.0538428	LY6D	cluster 6
SELPLG	uniprot.Q14242_ukb.OID20560_decode.11266_8	Q14242	0.812494	0.909792	0.909792	0.823037	0.457591	0.750186	0.729769	0.781469	0.136013	0.898972	0.341087	0.0625095	0.975432	SELPLG	cluster 3
GALNT3	uniprot.Q14435_ukb.OID20471_decode.6593_5	Q14435	0.462787	0.432996	0.432996	0.372901	0.587518	0.420425	0.428003	0.630056	0.547305	0.644212	0.35596	0.788206	0.943719	GALNT3	cluster 3
NEDD9	uniprot.Q14511_ukb.OID30503_decode.12862_14	Q14511	0.0343825	0.0421809	0.0421809	0.120741	0.502841	0.4444	0.579904	0.897733	0.1324	0.922562	0.287376	0.111791	0.975432	NEDD9	cluster 3
ITIH4	uniprot.Q14624_ukb.OID30762_decode.4811_33	Q14624	0.223828	0.249747	0.249747	0.959359	0.022199	0.53488	0.373397	0.878085	0.0881899	0.757666	0.00779495	0.486561	0.943719	ITIH4	cluster 3
ICAM4	uniprot.Q14773_ukb.OID20578_decode.6550_4	Q14773	0.846935	0.898877	0.898877	0.326029	0.147256	0.169135	0.171436	0.596716	0.936292	0.350156	0.119603	0.0473325	0.358183	ICAM4	cluster 4
AGER	uniprot.Q15109_ukb.OID20756_decode.4125_52	Q15109	0.00869398	0.0177306	0.0177306	0.171939	2.82e-06	0.0044447	0.00247918	0.675263	0.863869	0.431712	0.197569	0.000159457	0.53131	AGER	cluster 4
PON3	uniprot.Q15166_ukb.OID20777_decode.NA	Q15166	0.00359971	0.00353018	0.00353018	0.00260149	0.235162	0.00321203	0.00383538	0.489968	0.000473909	0.898972	0.0185008	0.00245286	0.0340402	PON3	cluster 5
NECTIN1	uniprot.Q15223_ukb.OID30545_decode.8803_61	Q15223	0.134585	0.134368	0.134368	0.330872	0.42638	0.736978	0.845336	0.878754	0.440684	0.797112	0.831639	0.976281	0.58578	NECTIN1	cluster 2
RABEP1	uniprot.Q15276_ukb.OID30647_decode.NA	Q15276	0.0159063	0.0185312	0.0185312	0.498682	0.178999	0.966035	0.89872	0.792413	0.325796	0.6954	0.326228	0.242543	0.914032	RABEP1	cluster 3
ANGPT1	uniprot.Q15389_ukb.OID20740_decode.2811_27	Q15389	0.0793127	0.0738256	0.0738256	0.698494	0.264684	0.930297	0.899904	0.609565	0.57581	0.946993	0.697762	0.365936	0.686511	ANGPT1	cluster 3
SHH	uniprot.Q15465_ukb.OID30516_decode.2743_5	Q15465	0.0627281	0.0638582	0.0638582	0.0948644	0.693266	0.132811	0.147558	0.675263	0.307489	0.843634	0.40227	0.165412	0.949182	SHH	cluster 2
CDSN	uniprot.Q15517_ukb.OID20667_decode.7085_81	Q15517	0.00119051	0.000696587	0.000696587	8.54e-09	1.7e-13	7.26e-11	4.63e-11	0.549694	0.258172	0.920898	0.394207	0.00294114	5.96e-06	CDSN	cluster 2
TPSAB1	uniprot.Q15661_ukb.OID20642_decode.9409_11	Q15661	0.143204	0.141987	0.141987	0.141537	0.158318	0.146753	0.151933	0.549694	0.359965	0.575373	0.886503	0.784459	0.585254	TPSAB1	cluster 6
ZNF174	uniprot.Q15697_ukb.OID30508_decode.11486_26	Q15697	0.92226	0.867294	0.867294	0.963822	0.969785	0.950261	0.921617	0.843797	0.51473	0.922631	0.520628	0.882374	0.558618	ZNF174	cluster 4
CD226	uniprot.Q15762_ukb.OID30556_decode.5062_60	Q15762	0.0742072	0.0798697	0.0798697	0.58555	0.259628	0.979664	0.986057	0.675263	0.539699	0.757666	0.409704	0.812344	0.824891	CD226	cluster 3
ADIPOQ	uniprot.Q15848_ukb.OID30748_decode.3554_24	Q15848	2.91e-05	2.38e-05	2.38e-05	7.35e-06	0.892191	0.00151724	0.00300941	0.589367	0.000178918	0.757666	0.00325493	4.26e-10	0.585912	ADIPOQ	cluster 5
LAMA4	uniprot.Q16363_ukb.OID20769_decode.6577_64	Q16363	0.0139163	0.0101203	0.0101203	1.57e-05	0.0058709	1.11e-05	1.39e-05	0.592292	0.00340367	0.806585	0.261563	0.0206225	0.0204867	LAMA4	cluster 2
PRR4	uniprot.Q16378_ukb.OID30607_decode.NA	Q16378	0.751167	0.796587	0.796587	0.0412544	0.0166623	0.0104311	0.00855756	0.934953	0.120576	0.591448	0.099823	0.0705798	0.493516	PRR4	cluster 4
IL17A	uniprot.Q16552_ukb.OID20469_decode.9170_24	Q16552	0.948176	0.953849	0.953849	0.9951	0.937374	0.993556	0.997333	0.587035	0.660926	0.937857	0.720033	0.605679	0.75933	IL17A	cluster 3
ECM1	uniprot.Q16610_ukb.OID30736_decode.3366_51	Q16610	0.340761	0.342545	0.342545	0.547896	0.441959	0.941228	0.858395	0.786452	0.539699	0.544068	0.332242	0.349283	0.949182	ECM1	cluster 4
DBN1	uniprot.Q16643_ukb.OID30549_decode.NA	Q16643	0.0168272	0.0165683	0.0165683	0.013883	0.542634	0.060453	0.0686188	0.773358	0.57761	0.572645	0.289381	0.455013	0.714212	DBN1	cluster 2
PRSS8	uniprot.Q16651_ukb.OID20763_decode.15513_108	Q16651	4.84e-06	3.57e-06	3.57e-06	7.1e-09	0.108477	1.41e-07	3.57e-07	0.612329	4.45e-08	0.469955	2.33e-05	2.99e-17	0.240562	PRSS8	cluster 2
CCL15	uniprot.Q16663_ukb.NA_decode.18289_16	Q16663	0.770476	0.703208	0.703208	0.400355	0.345482	0.405628	0.401906	0.651694	0.777027	0.930747	0.939843	0.338913	0.103436	CCL15	cluster 2
HIF1A	uniprot.Q16665_ukb.OID30425_decode.13089_6	Q16665	0.0105592	0.0105196	0.0105196	0.0128529	0.824541	0.0672496	0.0872	0.905409	0.308734	0.932756	0.572909	0.605495	0.939285	HIF1A	cluster 2
DECR1	uniprot.Q16698_ukb.OID20579_decode.12687_2	Q16698	0.157762	0.147241	0.147241	0.823037	0.27562	0.823207	0.783734	0.675263	0.946788	0.35355	0.120989	0.661518	0.928618	DECR1	cluster 3
NDUFA5	uniprot.Q16718_ukb.OID30520_decode.19200_16	Q16718	0.0832138	0.0894727	0.0894727	0.313973	0.634634	0.711429	0.731044	0.742462	0.0483641	0.739632	0.122856	0.0603198	0.967608	NDUFA5	cluster 2
KYNU	uniprot.Q16719_ukb.OID20669_decode.4559_64	Q16719	0.000565236	0.000563266	0.000563266	0.00217499	0.540882	0.0215697	0.0355382	0.843797	0.0253155	0.591448	0.0551451	0.00199212	0.861194	KYNU	cluster 2
MICB_MICA	uniprot.Q29980_Q29983_ukb.OID20593_decode.NA	Q29980_Q29983	NA	NA	NA	NA	NA	NA	NA	NA	NA	NA	NA	NA	NA	MICB_MICA	#N/A
CEACAM21	uniprot.Q3KPI0_ukb.OID20548_decode.7204_1	Q3KPI0	0.033856	0.031694	0.031694	0.027161	0.0576525	0.0289649	0.0300948	0.555948	0.123605	0.68145	0.479132	0.049423	0.218919	CEACAM21	cluster 6
CDON	uniprot.Q4KMG0_ukb.OID20754_decode.4541_49	Q4KMG0	0.779621	0.740268	0.740268	0.515655	0.485263	0.53488	0.539235	0.578611	0.876096	0.8749	0.711897	0.692936	0.975432	CDON	cluster 3
AMOT	uniprot.Q4VCS5_ukb.OID30572_decode.NA	Q4VCS5	0.000224512	0.000182894	0.000182894	4.75e-05	0.298079	0.000470128	0.000772595	0.0502086	8.73e-05	0.635982	0.0474501	8.93e-06	0.585912	AMOT	cluster 2
TP53I3	uniprot.Q53FA7_ukb.OID30632_decode.17748_21	Q53FA7	0.170642	0.169554	0.169554	0.34618	0.397199	0.625545	0.673109	0.697456	0.124152	0.946993	0.40845	0.212656	0.943719	TP53I3	cluster 3
SDK2	uniprot.Q58EX2_ukb.OID30662_decode.NA	Q58EX2	0.101983	0.0749479	0.0749479	0.0076798	0.0383142	0.00786714	0.00857417	0.697456	0.124881	0.434892	0.627481	0.083399	0.852658	SDK2	cluster 2
NHLRC3	uniprot.Q5JS37_ukb.OID30614_decode.9087_8	Q5JS37	0.00025533	0.000168803	0.000168803	0.00198254	0.751449	0.0290817	0.0535032	0.578611	1.38e-05	0.772531	0.0218892	2.51e-08	0.475187	NHLRC3	cluster 2
PSMG4	uniprot.Q5JS54_ukb.OID30514_decode.NA	Q5JS54	0.0490979	0.0511942	0.0511942	0.0538588	0.386013	0.0746859	0.0843436	0.489968	0.150219	0.513502	0.872657	0.319496	0.895199	PSMG4	cluster 2
COLEC12	uniprot.Q5KU26_ukb.OID20738_decode.5457_5	Q5KU26	0.00308954	0.00164074	0.00164074	4.41e-09	5.38e-16	9.44e-13	2.35e-13	0.00285658	2.85e-06	0.635982	0.0185008	0.00245286	2.7e-08	COLEC12	cluster 6
CLEC12A	uniprot.Q5QGZ9_ukb.OID30552_decode.11187_11	Q5QGZ9	0.209579	0.198856	0.198856	0.141547	0.250844	0.145009	0.152655	0.936482	0.221245	0.971718	0.337324	0.266431	0.811672	CLEC12A	cluster 2
RABGAP1L	uniprot.Q5R372_ukb.OID20447_decode.NA	Q5R372	0.0562211	0.0589186	0.0589186	0.404216	0.473293	0.848531	0.881058	0.907326	0.0759239	0.757487	0.15417	0.0919468	0.66362	RABGAP1L	cluster 3
PDZK1	uniprot.Q5T2W1_ukb.OID30550_decode.16852_10	Q5T2W1	0.00118611	0.00113343	0.00113343	9.94e-05	0.498322	0.000601991	0.00100128	0.957369	0.0210952	0.536007	0.0321723	0.000936254	0.0664413	PDZK1	cluster 2
ARTN	uniprot.Q5T4W7_ukb.OID20446_decode.2939_10	Q5T4W7	0.395441	0.436041	0.436041	0.526047	0.996125	0.632638	0.621778	0.669453	0.388351	0.4854	0.611445	0.330171	0.914032	ARTN	cluster 4
BCL2L15	uniprot.Q5TBC7_ukb.OID30498_decode.NA	Q5TBC7	0.235383	0.231418	0.231418	0.262641	0.330159	0.291698	0.295984	0.7709	0.371728	0.912053	0.418556	0.298545	0.558988	BCL2L15	cluster 2
DDI2	uniprot.Q5TDH0_ukb.OID30602_decode.NA	Q5TDH0	0.257877	0.325808	0.325808	0.88379	0.490431	0.877197	0.842996	0.792413	0.808335	0.434892	0.140413	0.992727	0.945313	DDI2	cluster 4
MYOM3	uniprot.Q5VTT5_ukb.OID30633_decode.13966_30	Q5VTT5	0.0012371	0.00157247	0.00157247	0.609674	1.3e-06	0.00383228	0.00148548	0.813945	0.631267	0.434892	0.0829792	0.200611	0.0739415	MYOM3	cluster 4
CD276	uniprot.Q5ZPR3_ukb.OID20680_decode.NA	Q5ZPR3	0.860643	0.696163	0.696163	0.014094	0.00139456	0.00472443	0.00379178	0.702188	0.0511219	0.453455	0.874044	0.987663	0.664137	CD276	cluster 2
IGFL4	uniprot.Q6B9Z1_ukb.OID30500_decode.NA	Q6B9Z1	0.973008	0.915776	0.915776	0.807151	0.708214	0.837089	0.840667	0.702188	0.685477	0.663952	0.614713	0.838068	0.69574	IGFL4	cluster 4
FCRL6	uniprot.Q6DN72_ukb.OID20529_decode.6617_12	Q6DN72	0.0955849	0.0948557	0.0948557	0.0988021	0.189251	0.111303	0.113018	0.539002	0.276408	0.544068	0.250536	0.190854	0.365434	FCRL6	cluster 6
IL31	uniprot.Q6EBC2_ukb.OID30487_decode.10455_196	Q6EBC2	0.238305	0.249993	0.249993	0.80508	0.296188	0.834688	0.767134	0.947289	0.469192	0.757487	0.910441	0.972738	0.875082	IL31	cluster 3
SFRP4	uniprot.Q6FHJ7_ukb.OID30648_decode.17447_52	Q6FHJ7	0.0524652	0.031694	0.031694	2e-06	1.34e-07	1.57e-08	7.95e-09	0.737779	0.0433419	0.739307	0.513447	0.00182354	0.037241	SFRP4	cluster 2
PTRHD1	uniprot.Q6GMV3_ukb.OID30659_decode.NA	Q6GMV3	0.00432319	0.0050078	0.0050078	0.382647	0.104622	0.979664	0.929976	0.697321	0.307489	0.70683	0.289297	0.202764	0.957612	PTRHD1	cluster 3
LAIR1	uniprot.Q6GTX8_ukb.OID20737_decode.11284_24	Q6GTX8	4.21e-05	3.32e-05	3.32e-05	3.44e-07	2.66e-06	7.69e-08	7.24e-08	0.0263961	8.59e-06	0.531026	0.00779495	5.44e-06	0.000128388	LAIR1	cluster 6
TNFAIP8L2	uniprot.Q6P589_ukb.OID30629_decode.NA	Q6P589	0.0618244	0.0658958	0.0658958	0.885487	0.112	0.666266	0.602712	0.631592	0.244604	0.544068	0.120989	0.103588	0.910379	TNFAIP8L2	cluster 3
LEG1	uniprot.Q6P5S2_ukb.OID30608_decode.7154_92	Q6P5S2	0.204521	0.189677	0.189677	0.279792	0.864855	0.446972	0.461223	0.440096	0.948259	0.918124	0.87822	0.0230813	0.0802485	LEG1	cluster 4
ADGRD1	uniprot.Q6QNK2_ukb.OID30588_decode.NA	Q6QNK2	0.0683214	0.0557291	0.0557291	0.215733	0.61088	0.56745	0.661532	0.731872	0.189935	0.806585	0.244015	4.92e-13	0.358183	ADGRD1	cluster 3
RICTOR	uniprot.Q6R327_ukb.OID30433_decode.NA	Q6R327	0.932073	0.955916	0.955916	0.3874	0.381449	0.362485	0.326843	0.582272	0.0626731	0.531026	0.70549	0.643342	0.735098	RICTOR	cluster 4
METAP1D	uniprot.Q6UB28_ukb.OID20519_decode.NA	Q6UB28	0.00058311	0.000479254	0.000479254	0.203903	0.0551952	0.880101	0.973042	0.790053	0.0990021	0.454343	0.0321723	0.156144	0.943719	METAP1D	cluster 3
ENPP7	uniprot.Q6UWV6_ukb.OID20689_decode.4435_66	Q6UWV6	NA	NA	NA	NA	NA	NA	NA	NA	NA	NA	NA	NA	NA	ENPP7	#N/A
OLFM4	uniprot.Q6UX06_ukb.OID30665_decode.4769_10	Q6UX06	0.119694	0.12412	0.12412	0.470102	0.605959	0.736978	0.811583	0.934953	0.379572	0.780677	0.890854	0.454234	0.939285	OLFM4	cluster 3
CXCL17	uniprot.Q6UXB2_ukb.OID20622_decode.9495_10	Q6UXB2	3.1e-05	2.57e-05	2.57e-05	5.31e-07	0.435913	1.43e-05	4.1e-05	0.905409	0.35751	0.431712	0.0515029	0.000850113	0.313548	CXCL17	cluster 2
CLEC4G	uniprot.Q6UXB4_ukb.OID20590_decode.10781_19	Q6UXB4	0.000700116	0.000573837	0.000573837	2.5e-05	0.0052176	3.95e-05	5.28e-05	0.633929	0.0112185	0.943549	0.165104	1.91e-05	0.00273686	CLEC4G	cluster 2
PI16	uniprot.Q6UXB8_ukb.OID30676_decode.NA	Q6UXB8	0.204454	0.177631	0.177631	0.111291	0.16778	0.132811	0.135827	0.701938	0.208115	0.866396	0.425107	0.144456	0.533496	PI16	cluster 4
CRELD2	uniprot.Q6UXH1_ukb.OID20751_decode.NA	Q6UXH1	4.34e-05	4.03e-05	4.03e-05	4.95e-05	0.115184	0.000259832	0.000419929	0.592292	0.000211871	0.431712	0.000269567	0.000638783	0.116784	CRELD2	cluster 2
LRRN1	uniprot.Q6UXK5_ukb.OID20438_decode.11293_14	Q6UXK5	7.25e-06	8.26e-06	8.26e-06	0.115133	0.000680759	0.616211	0.407736	0.578611	0.891388	0.431712	0.141162	0.385969	0.884074	LRRN1	cluster 5
IL20RB	uniprot.Q6UXL0_ukb.OID30461_decode.13435_31	Q6UXL0	0.774561	0.76197	0.76197	0.294527	0.186583	0.100117	0.100275	0.733307	0.63112	0.561244	0.318807	0.708647	0.948654	IL20RB	cluster 4
LRIG3	uniprot.Q6UXM1_ukb.OID30450_decode.3322_52	Q6UXM1	0.183036	0.155841	0.155841	0.0175249	0.0596935	0.0174338	0.0156013	0.596911	0.0351974	0.778211	0.0403458	0.0591726	0.558988	LRIG3	cluster 4
UNC5D	uniprot.Q6UXZ4_ukb.OID30447_decode.16307_22	Q6UXZ4	0.00758757	0.016044	0.016044	0.00449512	2.06e-09	6.25e-06	2.57e-06	0.777565	0.344855	0.572645	0.179278	0.00355681	0.285267	UNC5D	cluster 4
SLC39A5	uniprot.Q6ZMH5_ukb.OID20539_decode.NA	Q6ZMH5	1.4e-05	8.2e-06	8.2e-06	3.7e-13	2.4e-08	5.2e-16	2.09e-16	0.0178406	2.88e-07	0.946993	0.00385364	9.02e-16	1.15e-08	SLC39A5	cluster 6
PIK3AP1	uniprot.Q6ZUJ8_ukb.OID20587_decode.NA	Q6ZUJ8	0.0265874	0.0286479	0.0286479	0.0988021	0.889169	0.300237	0.348881	0.897733	0.688782	0.645309	0.425107	0.189697	0.816557	PIK3AP1	cluster 3
BTN2A1	uniprot.Q7KYR7_ukb.OID20713_decode.8869_5	Q7KYR7	3.15e-07	6.87e-08	6.87e-08	2.48e-20	1.35e-24	5.41e-30	2.01e-31	0.238774	5.86e-06	0.350156	0.341087	0.144515	0.000300341	BTN2A1	cluster 6
VASH1	uniprot.Q7L8A9_ukb.OID20516_decode.NA	Q7L8A9	0.0384323	0.0379267	0.0379267	0.706161	0.132504	0.796296	0.758955	0.833009	0.232199	0.545619	0.157368	0.0666697	0.975432	VASH1	cluster 3
C1QL2	uniprot.Q7Z5L3_ukb.OID30515_decode.15670_15	Q7Z5L3	0.0527137	0.0534628	0.0534628	0.317448	0.605647	0.70243	0.783734	0.697456	0.87522	0.810775	0.700857	0.860894	0.50569	C1QL2	cluster 3
SPRED2	uniprot.Q7Z698_ukb.OID30423_decode.NA	Q7Z698	0.846935	0.835931	0.835931	0.897699	0.798149	0.862895	0.87281	0.776016	0.620993	0.806585	0.43978	0.563611	0.596392	SPRED2	cluster 3
MILR1	uniprot.Q7Z6M3_ukb.OID20482_decode.11173_29	Q7Z6M3	0.808573	0.724784	0.724784	0.0860482	0.0596935	0.0561056	0.0525224	0.802163	0.624408	0.575373	0.572909	0.51139	0.914032	MILR1	cluster 4
YTHDF3	uniprot.Q7Z739_ukb.OID20478_decode.NA	Q7Z739	0.0177432	0.0152988	0.0152988	0.164078	0.518023	0.601329	0.649236	0.913243	0.104361	0.469955	0.0486115	0.00604467	0.379015	YTHDF3	cluster 3
GLRX5	uniprot.Q86SX6_ukb.OID30663_decode.16597_11	Q86SX6	0.000167774	0.000148072	0.000148072	0.0101508	0.261547	0.242513	0.360797	0.668711	0.1667	0.457185	0.0474006	0.0129199	0.932686	GLRX5	cluster 3
MTDH	uniprot.Q86UE4_ukb.OID30538_decode.NA	Q86UE4	0.000816355	0.000764914	0.000764914	0.0207862	0.264684	0.344828	0.43858	0.787942	0.0249477	0.4854	0.0242483	0.0001747	0.949182	MTDH	cluster 3
IFNLR1	uniprot.Q8IU57_ukb.OID20506_decode.7192_37	Q8IU57	0.00330588	0.00253885	0.00253885	3.37e-05	0.000448373	3.35e-06	3.19e-06	0.549694	0.0136808	0.536007	0.445859	5.12e-06	0.313055	IFNLR1	cluster 6
PHYKPL	uniprot.Q8IUZ5_ukb.OID30634_decode.NA	Q8IUZ5	0.0144066	0.011842	0.011842	0.233618	0.298516	0.717537	0.788442	0.609565	0.150219	0.683742	0.129235	0.00962551	0.398098	PHYKPL	cluster 3
ANKMY2	uniprot.Q8IV38_ukb.OID30518_decode.NA	Q8IV38	0.0300891	0.0299971	0.0299971	0.242866	0.493111	0.728732	0.758865	0.751491	0.299047	0.544068	0.165741	0.212656	0.881545	ANKMY2	cluster 3
SAMD9L	uniprot.Q8IVG5_ukb.OID20536_decode.NA	Q8IVG5	0.0092199	0.00907639	0.00907639	0.401076	0.162438	0.951962	0.9998	0.697456	0.267522	0.547967	0.198253	0.161216	0.861194	SAMD9L	cluster 3
MCEMP1	uniprot.Q8IX19_ukb.OID30501_decode.6283_60	Q8IX19	0.00763741	0.0084092	0.0084092	0.00530609	0.751449	0.0256972	0.0349952	0.878754	0.136013	0.510059	0.106695	0.040177	0.0417049	MCEMP1	cluster 2
SIRT2	uniprot.Q8IXJ6_ukb.OID21375_decode.5030_52	Q8IXJ6	0.0280955	0.0256563	0.0256563	0.877032	0.0223134	0.250256	0.214385	0.801685	0.363572	0.473097	0.136508	0.456244	0.585912	SIRT2	cluster 3
OSCAR	uniprot.Q8IYS5_ukb.OID20776_decode.7116_31	Q8IYS5	0.265718	0.266636	0.266636	0.315247	0.367755	0.347953	0.352193	0.752834	0.38326	0.635982	0.874966	0.455013	0.593562	OSCAR	cluster 1
RNF168	uniprot.Q8IYW5_ukb.OID30506_decode.NA	Q8IYW5	0.739152	0.657664	0.657664	0.319624	0.401165	0.340014	0.331945	0.934953	0.430665	0.937857	0.677249	0.683438	0.972003	RNF168	cluster 4
SPART	uniprot.Q8N0X7_ukb.OID30656_decode.11161_5	Q8N0X7	0.106381	0.122886	0.122871	0.768162	0.179455	0.796296	0.758955	0.494638	0.713637	0.564361	0.351664	0.258569	0.975432	SPART	cluster 3
AFAP1	uniprot.Q8N556_ukb.OID30569_decode.NA	Q8N556	0.364305	0.383582	0.383582	0.498479	0.974243	0.719611	0.758955	0.786452	0.57581	0.817324	0.925751	0.305356	0.975432	AFAP1	cluster 2
DPP10	uniprot.Q8N608_ukb.OID20527_decode.7890_68	Q8N608	0.364305	0.404997	0.404997	0.233655	0.366777	0.249735	0.224531	0.609565	0.643645	0.61475	0.268977	0.395023	0.431562	DPP10	cluster 4
IL22RA1	uniprot.Q8N6P7_ukb.OID20449_decode.3620_67	Q8N6P7	0.0627063	0.0679038	0.0679038	0.244851	0.302388	0.683748	0.770763	0.581009	0.177608	0.473097	0.926399	0.907139	0.895199	IL22RA1	cluster 2
ENAH	uniprot.Q8N8S7_ukb.OID20497_decode.9757_29	Q8N8S7	0.00332339	0.00206529	0.00206529	0.000195228	0.134114	0.00186681	0.00238885	0.991856	0.583276	0.68145	0.338423	0.0232997	0.163334	ENAH	cluster 2
BMPER	uniprot.Q8N8U9_ukb.OID30615_decode.15368_3	Q8N8U9	0.00566605	0.00347533	0.00347533	1.47e-05	0.000211621	3.11e-06	3.19e-06	0.828129	0.00116847	0.797112	0.108204	6.32e-06	0.653737	BMPER	cluster 2
DAND5	uniprot.Q8N907_ukb.OID30420_decode.NA	Q8N907	NA	NA	NA	NA	NA	NA	NA	NA	NA	NA	NA	NA	NA	DAND5	#N/A
SUMF1	uniprot.Q8NBK3_ukb.OID30486_decode.6941_11	Q8NBK3	0.0498945	0.040393	0.040393	0.000199038	0.0201445	0.000287987	0.000381374	0.609565	0.600019	0.934108	0.852205	0.242857	0.562548	SUMF1	cluster 2
HMCN2	uniprot.Q8NDA2_ukb.OID30592_decode.NA	Q8NDA2	NA	NA	NA	NA	NA	NA	NA	NA	NA	NA	NA	NA	NA	HMCN2	#N/A
BANK1	uniprot.Q8NDB2_ukb.OID20594_decode.NA	Q8NDB2	0.0907116	0.094926	0.094926	0.82548	0.035254	0.392341	0.338046	0.812032	0.224242	0.536007	0.155264	0.223133	0.699376	BANK1	cluster 3
APPL2	uniprot.Q8NEU8_ukb.OID30590_decode.NA	Q8NEU8	0.157605	0.186792	0.186792	0.633161	0.139552	0.40755	0.388254	0.45158	0.807335	0.4854	0.250536	0.795175	0.667229	APPL2	cluster 3
LILRB4	uniprot.Q8NHJ6_ukb.OID20429_decode.6453_70	Q8NHJ6	0.0112011	0.010291	0.010291	0.00209203	0.00440809	0.0013419	0.00124871	0.752834	0.0034664	0.687265	0.122856	0.00840656	0.0308576	LILRB4	cluster 6
AKR7L	uniprot.Q8NHP1_ukb.OID30488_decode.NA	Q8NHP1	0.0490979	0.0433594	0.0433594	0.063898	0.690446	0.137198	0.158947	0.875268	0.130194	0.644212	0.0818246	0.0290929	0.801835	AKR7L	cluster 2
GIMAP7	uniprot.Q8NHV1_ukb.OID30639_decode.NA	Q8NHV1	0.106381	0.100126	0.100126	0.291716	0.447012	0.796296	0.817055	0.454611	0.397271	0.536007	0.155264	0.51139	0.585912	GIMAP7	cluster 4
IL31RA	uniprot.Q8NI17_ukb.OID30475_decode.8273_84	Q8NI17	0.812494	0.776554	0.776661	0.666146	0.751294	0.609851	0.649236	0.932878	0.637211	0.920898	0.892015	0.357671	0.968275	IL31RA	cluster 4
IL17D	uniprot.Q8TAD2_ukb.OID20481_decode.4136_40	Q8TAD2	0.0336259	0.0242068	0.0242068	0.00154609	0.00789654	0.00148317	0.00149592	0.5139	0.0993383	0.841172	0.421605	0.212278	0.238272	IL17D	cluster 2
PNPT1	uniprot.Q8TCS8_ukb.OID20445_decode.NA	Q8TCS8	0.774561	0.732283	0.732283	0.939152	0.792195	0.967287	0.938398	0.845875	0.724608	0.63273	0.332386	0.242543	0.973857	PNPT1	cluster 3
CD200R1	uniprot.Q8TD46_ukb.OID20595_decode.5103_30	Q8TD46	0.350438	0.316542	0.316542	0.0565195	0.0572941	0.0342651	0.0320396	0.549694	0.444512	0.930747	0.793269	0.882374	0.943719	CD200R1	cluster 4
GNPDA2	uniprot.Q8TDQ7_ukb.OID30597_decode.NA	Q8TDQ7	0.235383	0.203655	0.203655	0.0988021	0.137947	0.0994803	0.104674	0.589367	0.444512	0.572824	0.700857	0.722767	0.629714	GNPDA2	cluster 3
DTD1	uniprot.Q8TEA8_ukb.OID30580_decode.19194_9	Q8TEA8	0.907901	0.90474	0.90474	0.589343	0.667947	0.646398	0.673109	0.809	0.624408	0.66338	0.35437	0.740374	0.942833	DTD1	cluster 3
WFIKKN2	uniprot.Q8TEU8_ukb.OID20785_decode.3235_50	Q8TEU8	0.000153773	0.000141606	0.000141606	0.000747177	0.0129963	0.507686	0.761008	0.627184	0.000620866	0.866434	0.0358804	2.1e-07	0.842412	WFIKKN2	cluster 5
CLEC4C	uniprot.Q8WTT0_ukb.OID20547_decode.9094_5	Q8WTT0	0.0753006	0.0702516	0.0702516	0.0428564	0.08479	0.04291	0.0428744	0.912225	0.624408	0.920898	0.958291	0.336358	0.473224	CLEC4C	cluster 2
MZB1	uniprot.Q8WU39_ukb.OID20732_decode.16322_10	Q8WU39	1.16e-09	9.38e-10	9.38e-10	5.65e-17	0.001109	1.09e-17	4.04e-17	0.555948	0.000138526	0.936192	0.00302496	2.98e-07	0.106005	MZB1	cluster 2
LTO1	uniprot.Q8WV07_ukb.OID20434_decode.18195_3	Q8WV07	NA	NA	NA	NA	NA	NA	NA	NA	NA	NA	NA	NA	NA	LTO1	#N/A
BLNK	uniprot.Q8WV28_ukb.OID30541_decode.19225_11	Q8WV28	7.25e-06	4.39e-06	4.39e-06	3.91e-06	0.494179	0.0008325	0.00176644	0.928909	0.134859	0.954913	0.367634	0.0016918	0.150966	BLNK	cluster 2
POF1B	uniprot.Q8WVV4_ukb.OID30504_decode.NA	Q8WVV4	0.0072324	0.0053626	0.0053626	8.05e-07	8.23e-06	1.5e-08	1.07e-08	0.555948	0.139947	0.835453	0.155264	0.000941814	9.51e-06	POF1B	cluster 2
PALLD	uniprot.Q8WX93_ukb.OID30444_decode.NA	Q8WX93	NA	NA	NA	NA	NA	NA	NA	NA	NA	NA	NA	NA	NA	PALLD	#N/A
SCG3	uniprot.Q8WXD2_ukb.OID20728_decode.7957_2	Q8WXD2	0.0150489	0.0160678	0.0160678	0.491905	0.0114358	0.0608956	0.0436102	0.886802	0.00126643	0.837084	0.210572	0.00108836	0.310012	SCG3	cluster 4
CLEC4D	uniprot.Q8WXI8_ukb.OID20609_decode.7752_31	Q8WXI8	3.95e-06	3.33e-06	3.33e-06	2.8e-09	0.00819701	6.19e-09	1.04e-08	0.281633	0.000151657	0.937857	0.0138247	0.000936254	0.0771359	CLEC4D	cluster 6
ST8SIA1	uniprot.Q92185_ukb.OID30442_decode.NA	Q92185	0.808573	0.934471	0.934471	0.599844	0.397199	0.568018	0.522349	0.949936	0.13954	0.674368	0.744766	0.454234	0.780834	ST8SIA1	cluster 4
SMPDL3A	uniprot.Q92484_ukb.OID20676_decode.4771_10	Q92484	0.91469	0.988666	0.988666	0.0575702	0.00819701	0.0160842	0.0150172	0.0240825	0.434595	0.763023	0.341087	0.0820254	0.0781661	SMPDL3A	cluster 5
CFHR4	uniprot.Q92496_ukb.OID30758_decode.6471_53	Q92496	0.424848	0.415917	0.415917	0.559696	0.751449	0.624553	0.649236	0.843797	0.798637	0.82518	0.733895	0.831181	0.933047	CFHR4	cluster 4
TSC1	uniprot.Q92574_ukb.OID30478_decode.NA	Q92574	0.952263	0.992754	0.992754	0.621312	0.54271	0.664526	0.644173	0.805446	0.57478	0.810775	0.419435	0.668789	0.852184	TSC1	cluster 3
CCL17	uniprot.Q92583_ukb.OID20745_decode.3519_3	Q92583	0.00384442	0.00339509	0.00339509	0.00117985	0.554235	0.00593787	0.0102121	0.379719	0.220995	0.469955	0.078769	0.00547323	0.772429	CCL17	cluster 3
TBC1D5	uniprot.Q92609_ukb.OID20521_decode.9960_2	Q92609	0.5519	0.578446	0.578446	0.928103	0.544155	0.877197	0.845336	0.526623	0.608113	0.806585	0.987826	0.822967	0.875082	TBC1D5	cluster 3
ARHGAP45	uniprot.Q92619_ukb.OID30653_decode.13544_9	Q92619	0.0536351	0.0577324	0.0577324	0.750194	0.155191	0.782318	0.730151	0.640315	0.413032	0.742448	0.338423	0.109423	0.975432	ARHGAP45	cluster 3
NRGN	uniprot.Q92686_ukb.OID30674_decode.18303_39	Q92686	0.831888	0.888861	0.888861	0.0910177	0.00453854	0.0141084	0.0120305	0.843797	0.778024	0.686678	0.421605	0.840999	0.558988	NRGN	cluster 3
TANK	uniprot.Q92844_ukb.OID20474_decode.14013_11	Q92844	0.636436	0.578446	0.578446	0.360279	0.627486	0.491376	0.456563	0.640315	0.375956	0.572824	0.240255	0.236501	0.957612	TANK	cluster 3
TNFRSF14	uniprot.Q92956_ukb.OID20783_decode.5352_11	Q92956	1.81e-07	1.08e-07	1.08e-07	2.7e-15	8.23e-11	1.77e-19	5.28e-20	0.0218794	7.1e-10	0.930747	0.000200013	2.87e-05	3.07e-05	TNFRSF14	cluster 6
RBPMS	uniprot.Q93062_ukb.OID30507_decode.NA	Q93062	0.0986421	0.101924	0.101924	0.336453	0.457779	0.827354	0.880825	0.549694	0.703724	0.605021	0.285684	0.161946	0.759835	RBPMS	cluster 2
RNASE6	uniprot.Q93091_ukb.OID30689_decode.5646_20	Q93091	0.00702782	0.00659378	0.00659378	0.00306123	0.00356158	0.00245708	0.00240449	0.144521	0.0159058	0.547967	0.0750752	0.0045112	0.0178321	RNASE6	cluster 1
NCLN	uniprot.Q969V3_ukb.OID20448_decode.NA	Q969V3	0.772765	0.768012	0.768012	0.979342	0.824541	0.928702	0.915758	0.737779	0.859901	0.750477	0.511943	0.882374	0.670537	NCLN	cluster 4
SYAP1	uniprot.Q96A49_ukb.OID30636_decode.NA	Q96A49	0.0162664	0.0175591	0.0175591	0.614455	0.108114	0.822405	0.761404	0.45158	0.45414	0.463674	0.109183	0.0019416	0.914032	SYAP1	cluster 3
VTI1A	uniprot.Q96AJ9_ukb.OID30640_decode.7952_2	Q96AJ9	0.0131639	0.0121101	0.0121101	0.0267311	0.853194	0.135774	0.152655	0.55342	0.1324	0.473097	0.0693611	0.102801	0.639297	VTI1A	cluster 2
RAB37	uniprot.Q96AX2_ukb.OID20425_decode.NA	Q96AX2	0.315707	0.261483	0.261483	0.712079	0.659764	0.954076	0.954221	0.792413	0.212062	0.863326	0.283662	0.931488	0.758959	RAB37	cluster 3
REPS1	uniprot.Q96D71_ukb.OID30496_decode.NA	Q96D71	0.197185	0.196857	0.196857	0.233637	0.781492	0.31609	0.326843	0.733307	0.389777	0.688225	0.337834	0.348359	0.493516	REPS1	cluster 6
FXYD5	uniprot.Q96DB9_ukb.OID20463_decode.NA	Q96DB9	0.0227	0.0224439	0.0224439	0.549712	0.0774861	0.847721	0.771926	0.711881	0.384704	0.547967	0.220686	0.0740149	0.943719	FXYD5	cluster 3
SIRT1	uniprot.Q96EB6_ukb.OID30439_decode.NA	Q96EB6	0.500894	0.428515	0.428515	0.546428	0.978283	0.761296	0.763656	0.549694	0.432711	0.216119	0.00625357	0.545582	0.980245	SIRT1	cluster 3
RNF31	uniprot.Q96EP0_ukb.OID30473_decode.NA	Q96EP0	0.89412	0.793892	0.793892	0.374856	0.42638	0.397395	0.387399	0.802163	0.502446	0.810775	0.926399	0.352462	0.877372	RNF31	cluster 4
CRELD1	uniprot.Q96HD1_ukb.OID30619_decode.7628_40	Q96HD1	8.96e-08	6.54e-08	6.54e-08	4.6e-09	0.00263392	4.2e-08	6.84e-08	0.138029	8.73e-05	0.920898	0.0297586	2.85e-10	0.00237475	CRELD1	cluster 2
CPB2	uniprot.Q96IY4_ukb.OID30734_decode.3518_54	Q96IY4	0.0153073	0.0172815	0.0172815	0.103192	0.50372	0.53992	0.644173	0.450281	0.360373	0.228677	0.0207827	0.00261941	0.656778	CPB2	cluster 3
MEGF10	uniprot.Q96KG7_ukb.OID20746_decode.11168_3	Q96KG7	0.124501	0.109995	0.109995	0.116527	0.449397	0.877616	0.959288	0.604425	0.26592	0.645309	0.300597	0.400661	0.673909	MEGF10	cluster 4
FCRL2	uniprot.Q96LA5_ukb.OID20639_decode.NA	Q96LA5	0.00589457	0.0045467	0.0045467	5.5e-05	0.000350651	1.58e-05	1.32e-05	0.781469	0.613534	0.911383	0.991301	0.0671426	0.26654	FCRL2	cluster 2
SIGLEC10	uniprot.Q96LC7_ukb.OID20537_decode.NA	Q96LC7	1.74e-05	1.25e-05	1.25e-05	1.89e-09	6.93e-05	1.58e-10	1.47e-10	0.527872	0.00271321	0.4854	0.290138	5.25e-06	0.0489507	SIGLEC10	cluster 6
HS6ST2	uniprot.Q96MM7_ukb.OID30481_decode.13524_25	Q96MM7	0.0161415	0.0299912	0.0299912	8.41e-07	5.45e-24	2.03e-14	5.59e-16	0.143457	0.0594698	0.00927923	0.0421759	0.00176308	0.23603	HS6ST2	cluster 2
FCRL3	uniprot.Q96P31_ukb.OID20443_decode.4440_15	Q96P31	0.076118	0.0719475	0.0719475	0.0311906	0.186583	0.0389907	0.0411456	0.986615	0.0545152	0.574029	0.53586	0.0708039	0.966061	FCRL3	cluster 2
IL17F	uniprot.Q96PD4_ukb.OID20456_decode.14026_24	Q96PD4	0.0164125	0.0153352	0.0153352	0.0455797	0.627156	0.220706	0.305093	0.751491	0.987583	0.920898	0.832716	0.753711	0.76847	IL17F	cluster 2
PGLYRP2	uniprot.Q96PD5_ukb.OID30742_decode.5601_2	Q96PD5	0.595948	0.551517	0.551517	0.323144	0.492718	0.323939	0.318943	0.865606	0.346108	0.937857	0.605261	0.0920212	0.0197153	PGLYRP2	cluster 4
SCGB3A2	uniprot.Q96PL1_ukb.OID20723_decode.NA	Q96PL1	0.00156129	0.00141751	0.00141751	0.300553	0.075833	0.895717	0.961196	0.555948	0.13954	0.937857	0.332242	0.000258775	0.949182	SCGB3A2	cluster 4
ERMAP	uniprot.Q96PL5_ukb.OID30539_decode.8631_13	Q96PL5	0.00897205	0.00863662	0.00863662	0.0101508	0.320887	0.0168098	0.0196435	0.856284	0.0535625	0.545619	0.036069	0.0375932	0.297182	ERMAP	cluster 2
NEDD4L	uniprot.Q96PU5_ukb.OID30521_decode.NA	Q96PU5	0.031089	0.040393	0.040393	0.614455	0.134214	0.785642	0.739821	0.912277	0.9869	0.914877	0.852967	0.356157	0.868145	NEDD4L	cluster 3
SLITRK1	uniprot.Q96PX8_ukb.OID30510_decode.15539_15	Q96PX8	3.76e-08	6.4e-08	6.41e-08	0.64036	4.36e-08	0.0791944	0.0333149	0.842751	0.0104963	0.39641	0.00374202	1.99e-07	0.670008	SLITRK1	cluster 5
[truncated: 173 more rows]

## Sheet: ST6
Supplementary Table 6. Causal effect of inflammation protein on kidney function based on 5 Mendelian Randomizations
[truncated: 41,005 more rows]

## Sheet: ST7
Supplementary Table 7. Causal effect of kidney function on inflammation protein based on 5 Mendelian Randomization
[truncated: 88,939 more rows]

[truncated: 7 more sheets: ST8, ST9, ST10, ST11, ST12, ST13, ST14]
